# Supplementary material for: Combining miRNA and mRNA Expression Profiles in Wilms Tumor Subtypes
Source: Int J Mol Sci. 2016 Mar 30;17(4):475. doi: 10.3390/ijms17040475 (PMC4848931; doi:10.3390/ijms17040475)
Supplement: Supplementary file 1 [file ijms-17-00475-s001.xlsx]

## Sheet: Blatt1 Table S1
Table S1. Deregulated miRNA in WT subtypes.
MiRNA	all WT vs Normal		blastema vs normal
	Fold change	p-value	Fold change	p-value	Fold change	p-value
hsa-let-7a					-4.30358	0.00464549
hsa-let-7c					-5.15153	0.0031755
hsa-let-7d					-2.57204	0.0245311
hsa-let-7d*					2.16168	0.00549959
hsa-let-7e					-3.31413	0.018624
hsa-let-7f					-5.97044	0.00286373
hsa-let-7g*					2.07084	0.00708904
hsa-miR-1					-4.32046	0.00269524
hsa-miR-101	-2.52409	0.0022804			-13.9175	0.000770496
hsa-miR-103-2*					2.07843	0.00118061
hsa-miR-105					2.38857	0.0401954
hsa-miR-106b*			2.59813	0.00123738
hsa-miR-107					-2.20598	0.0148073
hsa-miR-10a					-4.24919	0.0276319
hsa-miR-10a*					-2.45473	0.0149098
hsa-miR-10b					-8.12195	0.00859006
hsa-miR-1179					2.51246	0.0023225
hsa-miR-1180					8.57241	0.000982436
hsa-miR-1193			-2.07347	0.0157813
hsa-miR-1202					6.779	0.0169687
hsa-miR-1207-5p	5.1752	0.00144797	2.95441	0.016914	13.2149	0.000197007
hsa-miR-122					6.26677	0.0022982
hsa-miR-1224-3p					2.92569	0.0326697
hsa-miR-1225-3p					2.96699	0.00422737
hsa-miR-1225-5p	3.50426	9.16e-06			20.5542	6.63e-05
hsa-miR-1228					3.62809	0.00541483
hsa-miR-1228*					15.8745	0.000789929
hsa-miR-1231			-2.37104	0.011846
hsa-miR-1238					2.22046	0.000673406
hsa-miR-124					-2.62887	0.0238021
hsa-miR-1246					11.659	0.0290377
hsa-miR-1249	3.81421	0.0175998			6.77902	0.00212381
hsa-miR-125a-5p					-4.6109	0.00118061
hsa-miR-125b					-4.0114	0.00504771
hsa-miR-126	-3.76663	4.46e-06			-10.2261	0.000317281
hsa-miR-126*	-2.70338	0.0126203			-3.83572	0.00111611
hsa-miR-1261					4.22459	0.00849004
hsa-miR-1266					-2.11562	0.0487505
hsa-miR-1268	2.50794	7.21e-07			7.9301	0.000305357
hsa-miR-127-3p					3.06235	0.0191196
hsa-miR-1274b					-2.09623	0.03745
hsa-miR-128					-2.24615	0.0276319
hsa-miR-1280	-5.53177	9.52e-10	-5.35276	1.79e-05	-5.83611	0.000112569
hsa-miR-1281	2.16453	0.00789577			7.2476	0.000442332
hsa-miR-129-5p					2.11636	0.0103748
hsa-miR-1290					23.6083	0.0143714
hsa-miR-1296					2.57156	0.00947435
hsa-miR-1306					13.07	0.000666117
hsa-miR-130a			2.4557	0.000593921	-2.978	0.0181782
hsa-miR-130a*					2.06373	0.0184456
hsa-miR-130b	3.80083	0.00520967	6.15509	0.00573619
hsa-miR-1322					4.46519	0.00163263
hsa-miR-134	2.04091	0.00958326			4.75243	0.000543461
hsa-miR-138	-6.09319	0.0393204	-7.56824	0.0371913	-4.81755	0.0290377
hsa-miR-139-5p			-3.67129	0.0317679	-2.10353	0.0427593
hsa-miR-140-3p					-5.28709	0.0125424
hsa-miR-141	-31.9336	0.000951205	-14.4736	0.00302399	-24.1044	0.000476976
hsa-miR-143	-2.04312	0.043472			-11.7891	0.000673406
hsa-miR-145	-2.30911	0.000190459			-5.80609	0.00445033
hsa-miR-146a					-2.91458	0.0104854
hsa-miR-1470					2.27618	0.0023521
hsa-miR-148a	-2.56443	0.00768519			-4.6854	0.00105522
hsa-miR-148b					-2.41357	0.00346657
hsa-miR-149	2.291	0.0120225	2.25722	0.0279968
hsa-miR-151-3p					-3.54071	0.00586047
hsa-miR-151-5p					-3.94906	0.00480903
hsa-miR-152					-4.57268	0.000225927
hsa-miR-1538					2.94576	0.000708414
hsa-miR-155			2.24152	0.011846
hsa-miR-16			2.26592	0.0317679
hsa-miR-17*					-3.32697	0.0205578
hsa-miR-181a-2*			2.19796	0.00582484
hsa-miR-181b					3.19515	0.0205528
hsa-miR-181c*			2.97297	0.0331896
hsa-miR-1825	2.0258	0.0190592			6.36539	0.000387511
hsa-miR-183			4.47985	0.00582484
hsa-miR-184	-3.77856	0.0471754	-4.00142	0.0486834	-4.14916	0.0223024
hsa-miR-185*					2.20172	0.00174933
hsa-miR-188-5p					5.57264	0.00193666
hsa-miR-18a			3.57636	0.00792918
hsa-miR-1909*					3.94155	0.000565551
hsa-miR-190b					2.19424	0.00386516
hsa-miR-1910					4.03846	0.000789929
hsa-miR-1911					2.04605	0.0401954
hsa-miR-1915					3.12163	0.0256337
hsa-miR-192	-28.5527	0.00455468	-33.2017	0.00123738	-26.6363	0.00294873
hsa-miR-192*	-2.59251	0.0496439	-3.65887	0.0331896	-2.23408	0.0332452
hsa-miR-193a-3p					-2.96965	0.00193666
hsa-miR-193b	-2.11453	7.87e-05	-2.21994	0.00442672	-3.35807	0.00130028
hsa-miR-194	-46.2178	9.52e-10	-48.9516	1.42e-06	-64.6655	1.14e-06
hsa-miR-195					-10.5628	0.00121185
hsa-miR-195*					6.00674	0.000286762
hsa-miR-1973	-22.3522	0.00154679	-12.7473	0.00442672	-26.0486	0.000770496
hsa-miR-199a-3p			3.23366	0.0351761
hsa-miR-199b-5p	4.57993	0.00988295	7.87032	0.00398719
hsa-miR-19a					-3.93639	0.0421872
hsa-miR-19b					-2.31192	0.0429086
hsa-miR-200a	-46.4655	2.79e-13	-33.7079	7.97e-05	-38.3015	3.9e-06
hsa-miR-200a*			-2.35668	0.0331896
hsa-miR-200b	-35.3775	3.1e-06	-24.3932	0.000244422	-31.5751	4.75e-05
hsa-miR-200b*	-3.1324	0.0190592	-2.36423	0.0276845	-3.48341	0.00395914
hsa-miR-200c	-21.4575	7.21e-07	-24.6245	0.001264	-21.4426	4.75e-05
hsa-miR-204	-36.81	0.00154679	-43.0908	0.000322072	-36.5049	0.000991055
hsa-miR-206	2.14193	0.00699125			6.01892	0.00436076
hsa-miR-2113					2.94644	0.00112989
hsa-miR-215	-24.0158	0.00192994	-25.5154	0.000297122	-19.3407	0.00159669
hsa-miR-22	-2.15966	0.0040731	-2.47267	0.030872	-4.40756	0.0221679
hsa-miR-22*	-2.18871	3.33e-06			-2.98698	0.00108287
hsa-miR-223					6.31996	0.0272402
hsa-miR-2277-3p					2.4893	0.00267725
hsa-miR-2278					13.2259	0.000547244
hsa-miR-23b	-2.22707	0.000137514			-12.9717	0.000789929
hsa-miR-26a					-14.5136	0.0054752
hsa-miR-26b					-5.19657	0.00379881
hsa-miR-27a					-2.81441	0.0427593
hsa-miR-27b					-9.55225	0.00050516
hsa-miR-2861					3.17892	0.00477577
hsa-miR-296-5p					4.28405	0.0338793
hsa-miR-297					7.026	0.00165076
hsa-miR-29a	-3.59987	1.48e-05	-4.64727	0.000593921	-4.07996	0.00386516
hsa-miR-29b	-6.05381	1.53e-09	-4.49386	0.000114283	-6.71898	0.00159669
hsa-miR-29b-1*					2.63892	0.0146696
hsa-miR-29b-2*					2.99508	0.00549959
hsa-miR-29c	-6.41599	7.63e-10	-5.95252	4.22e-05	-7.18323	0.000770496
hsa-miR-29c*	-2.48117	0.0315166	-2.82789	0.0104376
hsa-miR-301a			3.87782	0.0301404
hsa-miR-301b			4.00062	0.00120824
hsa-miR-30a	-16.9463	7.4e-12	-11.4614	5.99e-06	-143.285	2.31e-05
hsa-miR-30a*	-18.8146	0.00022834	-18.327	0.000151679	-34.5797	0.000106007
hsa-miR-30b	-5.18561	2.83e-06	-2.37266	0.00306399	-18.6099	4.35e-05
hsa-miR-30c	-7.00515	8.66e-09	-4.86432	3.09e-05	-13.1765	7.79e-06
hsa-miR-30c-2*	-7.05949	0.000128821	-6.16279	0.000114283	-8.86263	0.000135833
hsa-miR-30d	-4.08877	0.0040731	-3.37401	0.0156617	-7.01981	0.00109457
hsa-miR-30d*					-2.08509	0.0169405
hsa-miR-30e	-3.67906	0.000527046	-2.85204	0.00573619	-7.13461	0.000673406
hsa-miR-30e*	-6.40949	2.86e-08	-3.83401	5.45e-05	-10.0187	3.9e-06
hsa-miR-3124					-2.32596	0.0383134
hsa-miR-3132					-2.19228	0.0105694
hsa-miR-3136					4.29659	0.00391129
hsa-miR-3148	2.16406	8.93e-05			19.0942	0.000396311
hsa-miR-3149	2.31002	0.00144797			25.0479	0.000552893
hsa-miR-3154					-4.7586	0.0315484
hsa-miR-3174	-3.91365	0.0040731	-4.1838	0.00648712	-4.07897	0.00166453
hsa-miR-3183			-2.30121	0.00306399
hsa-miR-3186-5p					2.21526	0.000572632
hsa-miR-3195					2.03778	0.00422737
hsa-miR-32					-2.38818	0.00525074
hsa-miR-32*					20.6322	0.000552893
hsa-miR-320a			2.6884	0.012845
hsa-miR-320b			2.56455	0.0021099
hsa-miR-320c	3.59274	3.56e-09	2.2033	0.000947791	6.4942	1.64e-05
hsa-miR-320d	3.33924	0.000298489	2.46508	0.00416925	4.34246	0.000180874
hsa-miR-320e	2.96208	0.000298489	2.37508	0.00582484	4.16196	0.00023481
hsa-miR-323b-5p					2.50891	0.00388073
hsa-miR-328					4.33965	0.00240737
hsa-miR-335			5.49904	0.0262607
hsa-miR-338-5p					3.82743	0.00269524
hsa-miR-342-3p	2.3406	0.0190592	3.08248	1.27e-05
hsa-miR-342-5p			2.82492	0.0435978
hsa-miR-346					4.7458	0.00541483
hsa-miR-34a	5.47031	0.0483291			4.94736	0.0193222
hsa-miR-34b*	2.25678	0.0363362	3.7876	0.0355543
hsa-miR-3605-5p					-2.41161	0.0432915
hsa-miR-3607-3p					-7.24971	0.0256337
hsa-miR-3607-5p	-3.66125	0.00729408			-6.16403	0.000673406
hsa-miR-3609					3.45676	0.00418021
hsa-miR-361-5p					-2.75386	0.0104285
hsa-miR-3619	-2.22165	7.57e-06	-2.74744	0.000161072
hsa-miR-362-3p	-3.80364	0.00120223	-2.70379	0.00786887	-6.39306	0.000420157
hsa-miR-362-5p	-3.72617	0.0195059	-2.8672	0.030872	-4.04532	0.00480903
hsa-miR-3622b-3p					2.90471	0.00444578
hsa-miR-363	-2.52828	0.0236749	-2.06959	0.0368776	-5.03498	0.00517868
hsa-miR-3647-3p					5.4706	0.00159669
hsa-miR-365					-2.53546	0.0162551
hsa-miR-365*					-2.11725	0.0465229
hsa-miR-3650					3.91287	0.00258898
hsa-miR-3651			2.53831	0.0355543
hsa-miR-3653					-10.7889	0.0181782
hsa-miR-3655					2.38958	0.00480903
hsa-miR-3656					6.97993	0.000767092
hsa-miR-3659					-2.40416	0.00269524
hsa-miR-3662					2.61498	0.00219682
hsa-miR-3665					2.08269	0.0276319
hsa-miR-3689a-3p					5.01213	0.00240737
hsa-miR-3689b*					5.6342	0.00420163
hsa-miR-3714					2.91315	0.0125176
hsa-miR-373					3.17759	0.00271353
hsa-miR-374a					-4.5431	0.00746262
hsa-miR-374b					-4.12633	0.0031755
hsa-miR-376a					-6.13337	0.0184456
hsa-miR-376c					-3.62457	0.00121697
hsa-miR-377					-3.53209	0.000243585
hsa-miR-378	-6.71232	0.000839801	-4.32089	0.0104376	-13.0281	0.000713218
hsa-miR-378*			-3.15429	0.0317679
hsa-miR-382	2.51265	0.000951205			4.14566	0.00388073
hsa-miR-383					3.04229	0.0159314
hsa-miR-3907			-2.66381	0.0355543
hsa-miR-3916					2.25304	0.0113711
hsa-miR-3923					6.21803	0.00341032
hsa-miR-3937					3.82701	0.000770496
hsa-miR-3944					2.48294	0.0392631
hsa-miR-411					-2.08616	0.0262792
hsa-miR-424	-2.78917	0.0126203			-10.1508	0.000246114
hsa-miR-425*					2.16024	0.00708904
hsa-miR-4254	-2.23216	0.044083	-3.24046	0.0088432
hsa-miR-4259					2.25056	0.0150096
hsa-miR-4260					-2.31871	0.0244215
hsa-miR-4261					-4.09875	0.0177743
hsa-miR-4270	3.25387	7.35e-05	2.07215	0.0355543	13.7987	0.000226415
hsa-miR-4274					3.96017	0.0120999
hsa-miR-4278					2.14742	0.0361155
hsa-miR-4280	-2.08514	0.00616155			-2.33477	0.00268659
hsa-miR-4281	3.00879	0.00234241			12.1901	0.000305357
hsa-miR-4284	-5.84348	0.00234241			-23.5719	0.000770496
hsa-miR-4286	-3.75103	1.22e-07	-2.87502	0.000399023	-9.4839	0.000305357
hsa-miR-429	-28.4646	9.52e-10	-29.987	5.78e-05	-20.7907	1.14e-06
hsa-miR-4290	2.16527	0.00455468			7.54136	0.000254674
hsa-miR-4291					-5.77449	0.0169059
hsa-miR-4297					3.78087	0.000991055
hsa-miR-4312					2.03123	0.0148287
hsa-miR-4313	-3.83928	0.0433536	-3.99684	0.0243485	-3.19835	0.0427295
hsa-miR-432*					2.10119	0.0272402
hsa-miR-4327	2.04839	0.0486507			3.37281	0.00480903
hsa-miR-449c					3.44212	0.00118061
hsa-miR-449c*					2.70521	0.00355257
hsa-miR-450a					-2.09315	0.0191332
hsa-miR-452					-2.65125	0.0282967
hsa-miR-455-3p					-3.40686	1.88e-05
hsa-miR-455-5p	-2.36193	0.012181			-3.42163	0.00183878
hsa-miR-483-3p	8.10918	0.0126338	4.61075	0.0317679	8.20706	0.00330018
hsa-miR-485-3p	2.02334	0.0209151			3.97178	0.00102891
hsa-miR-487b					-2.32777	0.003574
hsa-miR-488			2.11674	0.00611988
hsa-miR-493			-2.1753	0.0104376
hsa-miR-497					-7.64844	0.00607196
hsa-miR-497*					3.85045	0.00341848
hsa-miR-500a					-4.60737	0.0461578
hsa-miR-500a*	-2.69328	0.0492036			-3.34764	0.00947435
hsa-miR-501-3p					-3.16133	0.0103748
hsa-miR-502-3p	-3.83844	0.0195059	-2.39276	0.0413822	-4.68658	0.00268659
hsa-miR-503					-3.2754	0.0225841
hsa-miR-507					-2.20782	0.0383728
hsa-miR-509-3-5p	-2.88187	0.0368071			-3.45727	0.0139388
hsa-miR-509-5p	-2.87305	0.0406154			-3.06549	0.0178707
hsa-miR-510	-3.43443	0.00848597	-3.04683	0.016914	-3.53446	0.00378687
hsa-miR-513a-5p	-3.39217	0.00192994			-4.86885	0.0015618
hsa-miR-513c	-2.69623	0.000298489	-2.75162	0.0181753	-2.4445	0.00258898
hsa-miR-514	-9.56105	0.0315166	-15.7682	0.0276845	-6.95148	0.0191196
hsa-miR-514b-5p	-4.34316	0.014236			-7.38203	0.00192562
hsa-miR-520b					2.61317	0.0225018
hsa-miR-520d-3p					2.96503	0.00303864
hsa-miR-520f					2.30094	0.00267725
hsa-miR-532-3p	-5.3682	0.00494485	-3.22739	0.00804795	-7.5445	0.000991055
hsa-miR-532-5p	-4.15879	0.000754552	-2.72874	0.00544581	-7.67112	0.00014672
hsa-miR-539					5.84234	0.0019409
hsa-miR-542-3p					-3.69062	0.0125966
hsa-miR-545					2.11761	0.0107949
hsa-miR-548c-5p					4.6686	0.00150084
hsa-miR-548d-5p					2.74282	0.00355257
hsa-miR-548t					2.28644	0.00288637
hsa-miR-548w					2.65873	0.00267725
hsa-miR-548y					2.6331	0.0016776
hsa-miR-548z					2.06791	0.00239041
hsa-miR-557					3.59955	0.000789929
hsa-miR-574-5p					10.9148	0.000770496
hsa-miR-590-5p					-2.32576	0.0229502
hsa-miR-595	2.56618	0.000369323			23.952	0.000254674
hsa-miR-610					2.56561	0.00875909
hsa-miR-615-3p					2.12847	0.00947435
hsa-miR-628-3p					-3.5184	0.0487505
hsa-miR-630					4.21436	0.00330018
hsa-miR-636					2.92126	0.00271353
hsa-miR-638	2.46194	0.00455468			3.9468	0.00050516
hsa-miR-642b					2.81502	0.00117988
hsa-miR-645					3.57097	0.00269524
hsa-miR-647					2.46919	0.00448109
hsa-miR-650	-2.82359	0.000641415	-3.62539	0.000449344	-2.82282	5.11e-05
hsa-miR-660	-3.1577	0.00404992	-2.18626	0.0295474	-5.14035	0.000380333
hsa-miR-664*	-2.0919	0.00307952			-5.32095	0.00879093
hsa-miR-665	-2.17957	0.0468347			-2.32473	0.0132718
hsa-miR-670	2.28022	0.000298489			15.0617	0.000321324
hsa-miR-762					3.07242	0.0163254
hsa-miR-764					2.97656	0.0138387
hsa-miR-873			2.72067	0.0021099
hsa-miR-874					-4.21308	0.00269524
hsa-miR-875-3p					2.03862	0.00391129
hsa-miR-877*					5.47995	0.000991055
hsa-miR-885-5p					2.76985	0.000789929
hsa-miR-921					-2.12553	0.0435907
hsa-miR-92b*					2.51098	0.0256337
hsa-miR-937					2.83584	0.00026147
hsa-miR-939			-3.4305	0.0371913
hsa-miR-940	2.17478	0.0126203			3.97878	0.00121185
hsa-miR-941					3.40832	0.037707
hsa-miR-943					2.36973	0.0427593
hsa-miR-95					-3.06534	0.00541483
hsa-miR-96			2.53371	0.0216097
hsa-miR-98					-8.1594	0.000770496
hsa-miR-99a					-5.95359	0.0184456
hsa-miR-99b					-8.69135	0.0150096

## Sheet: Blatt1 Table S2
Table S2. Significantly deregulated genes in WT.
	all WT vs normal		blastema vs normal		regressive vs normal
Gene name	Fold change	pval	Fold change	pval	Fold change	pval
A1CF	-4.98149	1.34775e-12	-5.07794	1.22792e-06	-4.94305	0.000481118
ABCA12	2.73075	3.31648e-05	2.67348	0.000578032
ABCA3					-2.14477	0.0284906
ABCA8	-2.09807	0.00897283	-2.16945	0.0158781
ABCB1	-3.35057	3.27521e-06	-3.13711	0.000873816	-2.6343	0.0141871
ABCC2	-3.26324	0.0468865	-3.42934	0.0392286
ABCC6	-3.51951	1.38618e-10	-3.11154	8.28932e-06	-4.57724	0.00679765
ABCC6P1	-5.3226	7.09162e-10	-5.09883	1.74439e-06	-6.47191	0.00506657
ABCC9	2.77645	2.92742e-07	2.97062	9.45606e-06
ACADL	-5.884	1.34268e-05	-5.98384	4.35443e-05	-6.50834	0.0120431
ACADS	-2.06656	1.44523e-05	-2.1761	9.80929e-06
ACADSB	-2.1798	0.00105016	-2.06954	0.000337254	-2.46995	0.0044059
ACAP1	2.10099	3.76716e-05
ACAT1	-3.16278	0.000919211	-3.15064	0.000272238	-3.19984	0.0304881
ACE2	-7.16126	5.51894e-05	-6.73537	2.58877e-05	-7.65867	0.00214641
ACMSD	-7.19107	1.6911e-10	-7.21362	2.51278e-06	-7.65383	0.0178222
ACOT11	-2.15695	9.85666e-12	-2.33034	8.28413e-07
ACOT12	-3.3701	0.00258397	-3.47478	0.000742229	-3.57662	0.0106949
ACOT4			-2.03957	4.89559e-05
ACOT6	-3.57209	7.90515e-05	-3.72474	3.39721e-05	-3.66964	0.00349354
ACOX2					-2.71413	0.0059748
ACPP	-4.73938	0.000153923	-4.93795	4.15893e-05	-4.49862	0.0186308
ACSBG2	-2.53598	0.0074473	-2.87152	0.00400421	-2.58073	0.0268416
ACSF2	-2.34568	3.26002e-06	-2.34911	8.16086e-06	-2.31037	0.0212386
ACSL1	-2.66247	0.012963	-2.78226	0.0102561
ACSL6			-2.90145	0.0365475
ACSM2B	-9.63077	3.71894e-14	-9.51222	1.42277e-06	-10.0681	0.026191
ACSM3	-2.96467	0.000641102	-2.48432	0.00175535	-4.08716	0.0437166
ACSM5	-2.52809	0.000140479	-2.61902	0.00023981
ACSS1	-2.89138	1.89285e-08	-2.93745	1.3202e-05
ACTA1	2.89156	0.027073	3.40042	0.0205809
ACTR3C	-2.4471	0.00022451	-2.50759	3.90639e-05	-2.15116	0.018896
ACY1	-3.79805	0.00013655	-3.6174	2.97276e-05	-3.72586	0.0026915
ACY3	-6.28085	1.88094e-06	-6.32313	6.3119e-06	-6.45016	0.00219109
ADA	2.38981	0.0175963	2.34587	0.0149067
ADAM11			2.18162	9.0876e-05
ADAM19	2.20681	0.000197062			3.50519	0.01106
ADAMTS14	3.17934	0.00107433	2.4461	0.00721836	5.88291	0.0177584
ADAMTS16	-2.80316	0.000964329	-2.58038	0.00400676	-4.33241	0.0276077
ADAMTS2					2.49529	0.0333369
ADAMTS9-AS2	-2.38883	1.02912e-05	-2.25498	7.71234e-05	-2.87144	0.0193199
ADAP1	-2.094	5.30749e-06	-2.33384	0.000103791
ADCY10			-2.19803	9.92597e-05
ADCY3					2.54325	0.0268416
ADCY6					-2.00367	0.0432675
ADCY7	2.64989	0.00958825	2.30261	0.0157058
ADH6	-3.8887	5.33614e-08	-4.07456	8.28413e-07	-3.87354	0.00307287
ADHFE1					-2.16031	0.012257
ADIRF	-3.98997	4.47744e-08	-4.26687	5.51984e-05
ADORA2A-AS1	-4.00501	6.83345e-06	-3.9486	5.2998e-06	-3.79754	0.00262979
ADORA2B	3.37274	0.017934	2.80518	0.0398895
ADORA3	2.63246	0.00104858	2.05233	0.0203871
ADRB1	-3.67451	0.00322391	-3.86068	0.00245444
ADTRP	-2.10366	0.000461713	-2.5998	0.000268264
AEBP1	2.16525	0.000249973
AFAP1L2					-2.20235	0.0135935
AFF2	2.95713	3.93263e-06	3.1462	0.000248776
AFM	-8.58335	7.34424e-09	-8.70188	6.3367e-07	-8.85338	0.000804156
AFP	-7.74312	1.17005e-05	-8.10209	3.49176e-06	-6.99739	0.0174445
AGAP1-IT1	-2.50213	0.000565616	-2.41149	0.000502781	-2.69637	0.00787611
AGMAT	-7.08671	2.33494e-09	-6.97488	6.40174e-07	-6.38313	0.00440773
AGPAT9	-4.6801	6.24638e-10	-4.5523	6.60484e-06
AGR2	-2.53928	0.00531403	-2.52304	0.0227237
AGRN					-2.26577	0.0360542
AGT	-4.26338	0.000890929	-4.33193	0.00121933
AGTR1	-2.36597	0.00701988
AGXT	-2.90343	0.0340685	-3.02692	0.0273444
AGXT2	-8.4341	3.07697e-16	-8.43039	7.5989e-07	-8.35323	0.00131819
AIF1L	-2.77508	0.00264407	-2.41026	0.00479686	-3.59973	0.00951773
AIM1	-2.48298	0.00367048	-2.48077	0.00556301
AJAP1	-2.2573	0.00897283
AK4	-4.02702	6.98752e-11	-4.05661	1.04843e-06	-3.43391	0.0321275
AK7	-2.66242	0.00433957	-2.83855	0.00176906	-2.83793	0.027792
AKR7A3	-2.06778	0.00134925			-2.56723	0.0276175
AKR7L	-2.85535	1.36016e-05	-2.48979	7.44601e-05	-3.76963	0.0433965
ALB	-4.91226	0.00628048	-4.70273	0.00323375	-5.91741	0.0172418
ALDH1A1	-2.55004	0.000357286	-2.34761	0.0056175
ALDH1L1	-6.70496	4.56627e-14	-6.91963	7.5989e-07	-6.98809	0.0196043
ALDH4A1	-3.60374	0.00070748	-3.64303	9.97385e-05	-3.41543	0.00621367
ALDH6A1	-3.72755	3.15716e-10	-3.54325	6.40174e-07	-4.27229	0.00127199
ALDH8A1	-5.43231	1.07408e-10	-5.43751	4.03432e-06	-4.98525	0.0253958
ALDOB	-11.9661	6.69528e-15	-12.3742	7.09936e-07	-11.4645	0.0152037
ALK	2.66776	0.000319104	2.76364	0.00369001
ALPK2	-2.44578	0.038104
ALPL	-2.59155	0.0208699	-2.70354	0.0227136
ALS2CL	-2.45253	0.00628048	-2.49189	0.00216824	-2.29063	0.0214705
ALS2CR11			2.2663	0.000646216
AMACR	-2.12921	0.00013655			-2.6677	0.0283441
AMBP	-5.46301	0.00115802	-5.51799	0.000440731	-5.5546	0.0342672
AMDHD1	-3.83461	5.89139e-08	-3.68446	5.68393e-05
AMH	2.46289	0.00100256	2.68676	0.000715107
ANGPT2	2.0477	0.029408
ANGPTL2			2.10124	4.72312e-05
ANGPTL3	-5.45301	6.12821e-09	-5.65686	6.79826e-07	-5.44772	0.0014104
ANGPTL6	2.37897	0.000628774	2.53032	0.0012653
ANK2	-2.86809	5.13052e-06	-2.48897	5.85651e-05	-3.60211	0.0267936
ANK3	-2.31488	6.9206e-09			-3.51248	0.0371774
ANKFN1	2.20558	0.000353613	2.46907	0.00587582
ANKRD18A	-2.04407	4.51895e-06	-2.26487	7.47706e-05
ANKRD2	-4.16718	0.0281401	-4.05166	0.0204574
ANKRD22	-2.41754	0.0262265	-2.48308	0.0233139
ANKRD33B			-2.07138	0.0110755
ANKRD35	2.3576	0.00636217	2.68382	0.00338842
ANKRD50			2.15126	7.39085e-07
ANKS4B	-3.20333	3.92641e-07	-3.22102	0.00131683	-3.27796	0.00586835
ANO2			2.21079	0.0158188
ANO4	3.40523	2.22302e-07	3.63989	2.25726e-05
ANO5	-3.64528	8.74323e-05	-3.94744	0.000283509
ANPEP	-5.18756	1.23523e-07	-5.49297	3.49435e-06
ANTXR1	2.91187	0.0158876	2.67026	0.0190326
ANTXR2					2.25018	0.0370661
ANXA3					-4.45624	0.0302365
ANXA9	-4.98732	0.000303669	-4.90952	7.60681e-05	-4.9506	0.00481881
AOC1	-5.54905	9.59397e-10	-5.47439	2.19948e-06	-5.88605	0.00106359
AOX1	-2.70151	0.000232306	-2.7376	0.00195805
AP1M2	-4.75351	1.24893e-06	-4.1952	0.00015343	-6.59923	0.00424026
AP1S3	-2.06082	0.00891294	-2.04892	0.00494376
APBA2	3.01892	0.0128694	3.22141	0.00739895
APC2	2.39167	0.00347337	2.4096	0.0197121
APCDD1L	-2.823	0.000423242	-3.09392	0.00626038
APCDD1L-AS1	-2.65823	0.00188659	-2.92666	0.000985721	-2.83043	0.039489
APOBEC3C	2.00735	0.0143675			2.5082	0.0215673
APOBEC3G					2.65319	0.0251013
APOC1	4.83923	0.00466154	4.68562	0.005314
APOC3	-4.25177	4.06096e-07	-4.48066	1.36763e-06	-4.1133	0.00240381
APOH	-5.55386	0.00103986	-5.71791	0.000253312	-5.30031	0.00959008
APOM	-4.05884	4.04436e-06	-3.84848	4.76046e-06	-4.40502	0.00131819
AQP1	-3.41123	2.41647e-08	-3.34955	4.76046e-06	-3.32486	0.0207441
AQP2	-12.0363	5.69962e-07	-11.5521	2.787e-06	-12.8569	0.00124198
AQP3	-4.1276	0.0215347	-3.72397	0.0186952	-4.75501	0.0304881
AQP6	-4.4306	3.36173e-08	-3.97262	1.78416e-05	-5.27541	0.00140063
AQP7	-2.50067	0.00676336	-2.71434	0.00290151	-2.37233	0.0437967
AQP7P1	-3.21233	0.00435106	-3.20548	0.00174681	-3.12059	0.0180724
AQP7P3	-3.87591	0.00241192	-4.47282	0.0006954	-2.70228	0.0497773
ARG2	-3.43167	1.80924e-06	-3.05855	0.000139121	-3.61044	0.0135263
ARHGAP20	2.12449	0.00143616	2.39014	0.000886594
ARHGAP22	2.49425	0.00462662
ARHGAP25					2.88968	0.0410908
ARHGAP29	-2.12014	1.48223e-05	-2.04944	0.00156934
ARHGAP8	-3.33989	2.11442e-08	-3.29388	0.000188304	-4.37973	0.000804156
ARHGEF16	-3.19794	6.46983e-09	-2.51373	0.000177902	-4.77734	0.0276175
ARHGEF35					-2.07254	0.0320641
ARHGEF37					-3.89097	0.0366872
ARHGEF38	-2.78401	1.29798e-08	-2.81921	0.000188009
ARL4D	-2.52512	9.17917e-07	-2.08831	0.000176934	-4.2177	0.0198753
ARL9	2.57757	0.00183516	2.64789	0.00114438
ARSE	-4.06286	1.49582e-09	-3.87695	4.58647e-05
ARSF	-3.38063	3.44313e-07	-3.54112	5.33668e-06	-3.22963	0.00262979
ASAP1					2.36652	0.0177481
ASB15	-5.4165	1.66764e-06	-5.50174	2.53754e-06	-5.30215	0.00586835
ASB2			2.05402	0.013813
ASB5					-2.60073	0.0141607
ASB9	-2.66729	2.27758e-13	-2.51489	7.47068e-06	-2.78696	0.00232024
ASB9P1	-2.26919	2.27605e-06			-2.73919	0.005331
ASCL3	-2.02359	0.0410602	-2.42551	0.0198686
ASGR1	2.0645	0.000808942	2.06888	0.000724841	2.548	0.0211644
ASPA	-4.44675	2.02916e-08	-3.84491	0.000156834
ASPDH	-3.07385	5.95848e-09	-3.32983	2.51278e-06	-3.06523	0.0106089
ASPG	-6.13385	3.41594e-10	-5.7823	1.38175e-05	-6.29194	0.0272299
ASPM	4.26673	0.0264292	4.60098	0.0170236
ASPN			2.08221	0.0133507
ASS1	-4.69359	4.32739e-08	-4.73993	2.10316e-06	-5.53353	0.0119298
ASTN1	3.7545	4.43833e-05	4.86272	8.7341e-05
ATAD2	2.41208	0.0112784	2.48993	0.00564129
ATAD5	2.44525	9.48496e-05	2.52846	0.000124006	2.41918	0.0106944
ATOH7			2.51077	0.00991299
ATP12A	-5.89958	2.99284e-06	-5.844	5.86271e-06	-6.85902	0.00225251
ATP1A1	-3.26198	8.17775e-09	-3.3894	1.34425e-06	-2.63046	0.00956206
ATP1A4	-3.24149	0.00124818	-3.17456	0.000423735	-3.17001	0.0268416
ATP1B1	-4.20105	4.64696e-07	-4.0464	4.05372e-06	-4.65192	0.0026915
ATP1B2	-2.03242	0.000138636			-4.01249	0.020119
ATP2C2	-2.3606	0.0096182	-2.32046	0.0115598	-2.84315	0.0325484
ATP6	-2.16229	6.42381e-07	-2.17623	7.39577e-06	-2.13536	0.0091227
ATP6V0A4	-8.96448	2.27758e-13	-8.75574	8.28932e-06	-10.5309	0.00456194
ATP6V0D2	-5.35295	6.86478e-07	-5.4219	0.000127752
ATP6V1B1	-5.68959	1.04945e-06	-5.02733	1.86881e-05	-6.99487	0.0236732
ATP6V1G3	-8.31325	8.47693e-10	-7.93515	8.76661e-06	-9.34007	0.000804156
ATP8	-2.48028	4.06451e-08	-2.66393	2.53754e-06	-2.07812	0.0254441
AUH					-2.41971	0.011994
AUNIP			2.80308	0.0328846
AURKB			3.24432	0.0361886
AVPR1A	-4.34503	0.00964998	-4.61122	0.00510805
AVPR2	-4.32054	0.0179001	-4.50728	0.0123286	-4.57624	0.0455006
AZGP1	-6.11013	3.72842e-13	-6.264	1.34425e-06	-6.49341	0.00225251
B3GALT2			2.03453	0.0131434
B3GAT1	2.36966	0.0102873	3.1188	0.00269548
B3GNT4	-2.3103	0.0297743	-2.15547	0.0305928
B4GALNT4	4.36835	3.21432e-07	5.21371	7.48578e-06
BACH2			2.00524	0.0498465
BAI2	2.04607	0.00137531	2.28924	0.00072286
BAIAP2L2	-2.17923	0.00130379	-2.26192	0.000450528	-2.13302	0.0285412
BAIAP3	-2.07257	0.000235968
BARD1			2.02445	0.00367519
BARX1	3.27974	1.1313e-05	2.76229	0.00549851
BASP1	2.64153	0.00201361	2.16088	0.00481597
BAZ1A					2.27734	0.0162371
BBOX1	-8.25954	1.86484e-12	-8.74308	2.09608e-06	-9.04866	0.0243246
BCAM	-2.32284	2.92375e-07	-2.03623	0.000191295	-3.62631	0.0446564
BCL11A					2.79829	0.0206657
BCL2L10	-2.49675	0.00379767	-2.42412	0.00397289	-3.92128	0.00844052
BCMO1			-2.10782	0.00456043
BDH1	-2.61283	0.00228818	-2.2983	0.00334702	-2.55297	0.047593
BDH2					-2.65723	0.0320295
BDKRB1	-3.10189	0.000684602	-3.18385	0.00130124
BDKRB2	-3.81496	0.000459724	-3.89625	0.000552814
BDNF-AS					-2.28822	0.0239804
BEX1			2.97102	0.000264831
BEX5	-2.29726	0.00237552	-2.03274	0.0167575
BFSP2			-2.59649	0.0337263
BHLHE22	2.28767	0.000567848	2.54783	0.00767146
BHMT	-9.41567	2.76137e-14	-9.40982	2.94111e-06	-9.4748	0.02734
BHMT2	-6.52667	1.5699e-14	-6.09374	2.13116e-06	-6.42208	0.016717
BLM	3.58669	0.0148484	3.77835	0.00815968	3.8125	0.0337605
BLNK	-3.09135	5.69962e-07	-3.22971	0.000390731
BMP1					2.07141	0.0141607
BMP5	-2.52519	0.0229181	-2.21363	0.0356929	-3.64605	0.0242054
BMP8A	2.48347	0.00602891	2.47181	0.00524829
BMPER	3.21715	5.31137e-05	3.90112	0.000210614
BMPR1B					-2.44898	0.0438163
BOC	2.44903	0.00261623	2.66981	0.00216824
BORA					2.17001	0.0295913
BPHL					-2.52359	0.0173851
BRCA1	2.00407	0.00021325	2.11062	0.000248195
BRCA2	2.75604	0.00720042	2.53259	0.00663613	3.63726	0.0096806
BRSK1	2.44114	4.3269e-05	2.75399	2.33487e-05
BSND	-7.4379	1.21269e-14	-7.63461	1.74439e-06	-7.47112	0.000804156
BSPRY	-4.8163	1.88329e-09	-4.70127	0.000170575
BTBD17	3.33661	4.16706e-05	4.53053	0.000976339
BTC	-2.67896	8.13198e-07	-3.07726	0.000135907
BTNL9					-2.90118	0.0426925
BUB1	3.74146	0.0379505	3.92394	0.0273444
BUB1B	3.45916	0.022414	3.73865	0.0134244
C10orf115	-2.08341	0.00938865	-2.01766	0.00966712	-2.94543	0.0311541
C10orf126	-4.79546	2.91851e-08	-5.05442	8.28413e-07	-4.82191	0.00225251
C10orf25			2.22051	0.00281562
C10orf67	-2.11737	0.000449535	-2.02068	0.00097343	-2.57333	0.0451075
C11orf35	-2.26971	2.02816e-10	-2.26579	2.94897e-05
C11orf52	-3.71089	7.06699e-06	-3.07125	0.000125852	-5.56562	0.0204791
C11orf53					-2.17749	0.0449697
C11orf54	-3.08727	6.61893e-13	-2.91872	6.3367e-07	-3.38816	0.000869639
C11orf82	3.53659	0.0288015	3.81869	0.0196592	3.57749	0.0493244
C11orf86	-2.88744	0.0493819	-3.34706	0.0341998
C11orf87	2.70477	1.48605e-06	2.40329	4.93613e-05
C12orf39	-2.57954	8.85088e-08	-2.78704	5.50185e-05
C14orf105	-5.39835	3.06114e-10	-5.49089	6.683e-05	-6.27334	0.0279395
C14orf164	-2.08822	0.0120429	-2.46412	0.0125636
C14orf64			-2.24935	0.0231045
C15orf27	-2.66679	0.0162391	-2.44754	0.0251729
C16orf11	-7.03507	1.61974e-05	-6.84877	1.19248e-05	-7.7468	0.00202572
C16orf59	2.65735	0.0134798	3.26937	0.00490826
C16orf89	-3.67681	0.000109835	-3.3764	0.00079078	-4.81496	0.0199733
C17orf96			2.13035	0.000578518	2.17091	0.0370275
C19orf33	-2.31272	0.022752	-2.47011	0.0180051
C19orf69	-3.25392	4.96485e-06	-3.40265	1.60715e-06	-2.7796	0.00225251
C19orf77	-6.34866	8.04798e-11	-6.22844	1.61331e-05	-7.82762	0.00149153
C1orf106	-2.1879	0.0001364
C1orf112			2.04793	0.000670252
C1orf115	-3.10969	3.78799e-11	-2.9198	1.13404e-06	-4.31553	0.00913586
C1orf116	-4.80167	0.000246446	-4.76914	0.000356032	-5.82283	0.00432371
C1orf168	-5.02303	1.4446e-09	-5.0028	2.5431e-05	-5.60586	0.00131819
C1orf172	-2.44058	0.000106597
C1orf173			2.35785	0.0242314
C1orf204	-2.2129	2.25293e-06	-2.15936	0.00111868	-2.47639	0.0304881
C1orf210	-3.13037	5.53426e-06	-2.9879	0.000198842	-3.80386	0.00187613
C1orf64	-2.96277	0.002827	-3.0184	0.00120312	-2.84481	0.0387582
C1QA	3.10776	0.0152804	2.85999	0.021198
C1QB	3.84906	0.0166177	3.60761	0.0205918
C1QC	2.97514	0.0404043
C1QTNF7			2.10732	9.28662e-05
C21orf62	-3.57115	0.0305204	-3.49348	0.034127
C2CD4D	-2.16246	0.00607039	-2.40127	0.00243977
C2orf40	-3.29386	8.03032e-05	-2.46656	0.0177657
C2orf54	-5.63932	2.23818e-06	-5.64845	5.23018e-06	-6.251	0.00126731
C2orf62	-2.07537	0.00531778	-2.44086	0.00213105
C2orf71	-2.87648	0.0248006	-3.09124	0.0152763
C2orf88					-2.49886	0.00913586
C3orf70	2.11915	0.0117487	2.81571	0.00290158
C4orf19	-4.1323	4.03123e-09	-3.96993	0.000124992
C5orf58	-3.93537	0.00022476	-3.98318	0.000112057	-4.33118	0.0137883
C6	-2.39295	0.0468865
C6orf123			-2.02749	0.0297949	-2.49415	0.0431413
C7orf10	-2.10831	1.05897e-07	-2.40864	1.40743e-05
C8orf12	-2.11417	0.00356354	-2.28751	0.00229848	-2.32298	0.0255963
C8orf31	2.7019	1.59618e-05	2.87332	1.32244e-05
C8orf46	-2.92378	2.77935e-12	-2.77	1.34425e-06	-3.74731	0.00011882
C8orf47	-2.10758	0.00557886
C9	-2.66188	0.0191866	-2.82654	0.0110428	-2.9787	0.040707
C9orf129	2.03394	0.000840237
C9orf169					-2.06841	0.0280926
C9orf171	3.41145	4.67283e-05	4.0818	0.000787834
C9orf24	-4.39465	6.2504e-05	-4.35848	9.17125e-06	-4.48017	0.00194256
C9orf66	-4.26637	7.5741e-13	-4.55286	6.4008e-07	-3.86453	0.00402268
CA10	-5.70081	8.32859e-10	-5.96271	1.31338e-05	-6.74071	0.0252698
CA12	-5.22512	3.76637e-11	-5.23926	1.86881e-05	-4.89703	0.0208994
CA14	2.68942	7.18732e-05	3.20597	0.000552397
CA2	-5.36175	8.17565e-08	-5.17173	7.98575e-06
CA4	-3.7678	2.3174e-06	-3.24149	0.000253738	-5.72829	0.000953443
CA8					-2.71696	0.0366222
CABP1	-4.54356	4.66876e-11	-4.79631	2.23571e-06	-4.89682	0.0347056
CABYR	2.68161	1.01096e-07	2.49902	1.30094e-05
CACNA1A	2.0551	1.79321e-06	2.1169	0.000418179
CACNA1G	2.1588	0.00895528
CACNA2D1			-2.03235	0.00428738
CACNA2D3					-3.35743	0.0250895
CACNB2					-2.74986	0.0289992
CACNB3	2.0967	0.00014861	2.39262	0.000182551
CACNG6			3.8792	0.0281012
CALB1	-10.7391	1.09195e-05	-10.4702	5.06614e-06	-11.5638	0.00307287
CALCA	-2.08058	0.0386635	-2.03239	0.0471426	-2.87477	0.0477334
CALCR	-3.50004	0.0270045	-3.60386	0.0173027	-3.7258	0.0449697
CALU					2.32557	0.0455376
CAMK1D	2.41399	0.00760188	2.32961	0.00345044	2.48526	0.0145739
CAMSAP3	-2.1556	0.00466379
CAPN12	-3.70939	8.20347e-05	-3.72918	0.00017072	-3.85252	0.0304881
CAPN13	-4.25412	3.52502e-12	-4.27131	2.33981e-06	-4.25089	0.026191
CAPZA3	-2.4183	0.00204418	-2.73149	0.00128757
CARD10					-2.5606	0.0304881
CASC15	2.67913	3.74896e-05	2.91307	5.47285e-05
CASC16	-2.43854	0.000673721	-2.55469	0.00279768	-2.40683	0.0163729
CASC9			2.92804	0.0196974
CASR	-6.53848	2.64942e-05	-6.57047	3.27409e-05	-7.80515	0.0129303
CASZ1	-2.02001	2.37641e-11			-2.14566	0.000804156
CBLC	-3.34972	1.51341e-08	-3.45104	2.33609e-05	-3.6868	0.0122764
CBR3-AS1	-2.7183	3.10109e-05	-2.81797	0.000697741
CBX2	2.01736	0.00113201	2.29257	0.000510743
CCDC109B					2.73935	0.0262997
CCDC136	2.42794	1.35838e-08	2.79089	1.90373e-05
CCDC138			2.19182	8.2091e-05
CCDC148	-2.83422	3.43156e-08	-2.51987	4.93456e-05	-4.24377	0.0399742
CCDC160	-2.87383	0.0117755	-2.3469	0.023837	-4.49742	0.0281164
CCDC162P	-2.78145	0.00308051	-2.72698	0.00155401	-2.83764	0.0255963
CCDC178	-2.02206	4.93791e-06			-2.79012	0.012257
CCDC3	2.6516	0.00462308	2.41063	0.0126835
CCDC30					-2.11728	0.0484004
CCDC64	-3.25276	0.0141208	-3.32354	0.00705057	-3.55768	0.031311
CCDC64B	-2.19518	0.0010031	-2.20269	0.000621122	-2.54077	0.00846122
CCDC88A	2.67708	3.53301e-06	2.50119	9.98203e-06	3.28942	0.00695358
CCK	3.09757	0.000814656	4.59352	0.00345896
CCL11			2.08369	0.0461591
CCL18	5.56075	0.0156861	5.58488	0.017327
CCNA2			2.73855	0.0486618
CCNB1			2.3701	9.86312e-05
CCNB2			4.75469	0.0474854
CCND2	4.39773	1.63245e-06	4.84118	3.49176e-06
CCNE2	2.02687	0.0497774
CCNI2	-3.98177	3.12179e-05	-4.02235	3.04967e-05	-4.43846	0.0273735
CCR1	2.21894	0.037085
CCSAP					2.17571	0.0158533
CCSER1			-2.01424	5.85651e-05
CD14	2.21654	0.00927087
CD163	3.3103	0.0241913	2.80316	0.0462575
CD163L1	2.68848	6.19524e-06	2.43342	0.000282321
CD180	2.2376	0.000340119	2.01813	0.00724095
CD19	2.69447	1.5044e-05	3.24255	0.000226889
CD22	2.09419	0.0253667	2.41304	0.0115114
CD24	-3.1915	0.000718593
CD276	2.04817	2.09467e-06			2.42693	0.00240381
CD300A	2.16469	0.00314463
CD36	2.83727	0.00529219	2.60134	0.0103332
CD6	2.13356	0.0110776			4.13489	0.0194551
CD68	2.41864	0.0257089	2.15309	0.0436417
CD79A	-3.58563	0.0134798	-3.76577	0.00608504	-3.22366	0.0342299
CD84	3.09136	0.00228938	2.59853	0.0121042
CD96	2.3637	0.00307368	2.21068	0.00875878
CDC20	2.27594	0.000275505	2.41755	0.000366857
CDC25A			2.43769	0.000567631
CDC25C	2.97289	0.0281381	3.25078	0.0159433
CDC42BPG	-2.37666	0.00377168	-2.216	0.00611732	-3.31804	0.0192714
CDC45	2.96755	0.0464878	3.24505	0.0299359
CDC7			2.28424	0.0453212
CDCA2	2.89662	0.0328008	3.11439	0.0214907
CDCA7					2.15073	0.0345444
CDCA8	2.3241	0.0105232	2.6138	0.00517698
CDH1	-4.36823	3.03623e-07	-3.6308	0.000657143	-6.31978	0.0253958
CDH11	3.42155	3.07874e-07	3.41042	5.28343e-06	3.35356	0.00149153
CDH12	2.78142	0.00792957	2.87492	0.00813688
CDH15	2.82935	0.000156321	3.12656	0.00161011
CDH16	-9.45144	1.31022e-10	-9.29515	4.71191e-05	-12.1168	0.0285721
CDH24	2.16732	5.97505e-06	2.50916	9.1099e-05
CDH7	4.02192	2.42612e-05	5.25264	3.09518e-05
CDH9	-3.78083	0.000629522	-3.80922	0.000248221	-4.10447	0.00913586
CDHR3					-2.60631	0.00343053
CDHR5	-4.06372	1.50981e-05	-4.28607	2.10786e-05	-4.24817	0.0122764
CDK1	2.02707	0.000886456	2.1842	0.00175856
CDKL1	-2.3798	0.00321138	-2.43147	0.001639	-2.68523	0.0133796
CDKL2	-3.25393	0.000520344	-3.04637	0.00115737	-4.76533	0.0102605
CDKN1C					-2.65555	0.0356769
CDO1	2.06127	0.00514055	2.27487	0.00359733
CDON	2.17576	0.00296893	2.97335	0.000406017
CDS1	-2.13226	0.000439747
CDT1			2.8372	0.0472531
CEACAM1	-2.95741	0.000250481	-2.86249	0.000180408	-2.65007	0.00904228
CEACAM3	-2.18582	0.00335391	-2.48044	0.00169035
CECR6			2.15263	0.0382399
CELF4					-2.78483	0.00392323
CENPA	4.20913	0.0153863	4.48257	0.00952227
CENPE	3.78759	0.0341564	3.89977	0.0253569
CENPF	3.87258	0.0463873	4.26582	0.0293371
CENPH	3.088	0.00520279	3.49787	0.00213445
CENPK	3.00016	0.047085	3.13192	0.0360642
CENPL	2.18695	0.0488612	2.24736	0.0356915
CENPM			2.30882	0.0472228
CENPU	2.98832	0.0352804	3.34651	0.0220103
CENPW	3.64142	4.39932e-08	3.88301	3.71997e-06	3.18896	0.0415499
CEP170	2.05956	0.00576311			2.72642	0.0365935
CEP41			2.00157	0.0268535
CERKL	-3.50787	2.23021e-10	-3.8557	8.28413e-07	-3.08918	0.0315713
CERS1	3.27503	3.78466e-08	3.82189	1.33655e-06
CES3	-2.40218	0.0139604	-2.64086	0.00977544	-2.32476	0.0408012
CES4A			-2.07597	0.000922443
CFB	-2.0868	0.0399535
CFTR	-2.97099	0.00244425	-2.84958	0.0115733
CGN	-4.20364	1.07067e-05	-3.00224	0.000920044	-7.33742	0.0193199
CGNL1	-2.70472	1.217e-07	-2.36035	1.98334e-05	-4.41952	0.0356769
CHCHD10	-2.47498	0.000176452	-2.62172	7.53588e-05
CHDH	-3.68789	2.00416e-05	-3.47383	2.62074e-05	-4.39965	0.0132245
CHEK2					2.02318	0.0172418
CHGA			4.78643	0.0242474
CHGB					-3.40174	0.0311541
CHL1	-3.90677	4.52764e-09	-3.8874	6.74871e-05	-4.12984	0.022424
CHN1	2.48015	9.48713e-08	2.74496	2.33751e-05
CHRM3	-2.79673	0.000984184	-2.67535	0.00103401	-3.78929	0.0259489
CHRNA1	4.09528	1.31401e-06	4.85904	0.000113005
CHRNA5	4.28246	5.5188e-09	4.70514	1.43129e-06
CHRNE					2.66756	0.00975403
CHST1	4.34965	4.50833e-05	4.66647	6.21139e-05
CHST11	2.91157	0.0349121			4.68162	0.0213569
CHSY3	2.49533	0.00837374	2.50977	0.00624796	3.17372	0.0415499
CIDEB			-2.0097	0.00245779
CILP	3.02239	3.06902e-06	3.39856	0.000230546
CILP2	3.19412	4.04117e-06	3.18203	0.00246381
CISH					-2.31592	0.00844052
CIT					-2.56862	0.0409203
CITED1	3.54906	0.0105232	4.46506	0.00405543
CKAP2L	3.29941	0.0314127	3.60635	0.0197148
CKB	-2.90096	0.000115607	-2.33993	0.00288988
CKLF					2.28038	0.0171502
CKMT1A	-3.69704	5.31691e-07	-3.30486	0.000537898	-5.16265	0.0206253
CKMT2	-4.03646	4.16319e-08	-3.78845	3.8906e-05	-5.0208	0.0387582
CKS2			2.0991	0.0193977
CLCN5	-2.57404	0.00142553	-2.26513	0.00189616	-2.90334	0.012198
CLCNKA	-7.01675	5.11526e-05	-6.87469	1.78416e-05	-7.99212	0.00343053
CLCNKB	-7.16354	6.57293e-14	-7.0753	4.05372e-06	-7.50458	0.00480416
CLDN10	-5.01074	6.8184e-05	-4.65981	0.000192689	-6.27999	0.00254683
CLDN14	-4.91639	0.0030333	-5.22144	0.000750252	-4.37811	0.0201992
CLDN16	-6.25837	2.27758e-13	-6.14518	1.14406e-06	-6.65722	0.00225251
CLDN19	-3.53746	0.00728022	-3.5085	0.00311467	-4.31195	0.0164199
CLDN2	-6.09425	4.45701e-06	-6.03739	0.000112595
CLDN20	-2.92755	0.0287999	-3.34139	0.0194026
CLDN23	-2.20065	0.000362195	-2.69409	0.000328883
CLDN3	-2.01074	0.00546853
CLDN4	-2.26624	0.0141205
CLDN6	2.11319	0.000998906	2.60778	0.00425879
CLDN7	-2.58222	2.34685e-05	-2.53768	0.000296873	-3.10837	0.00285053
CLDN8	-7.68344	8.47844e-14	-7.46738	4.66504e-06	-8.54284	0.000804156
CLEC18B	-2.81939	1.59632e-05	-2.3953	0.00108597
CLEC3B	-2.88928	2.35312e-05	-3.14256	0.000146872
CLEC4A					3.03354	0.0495665
CLIC5	-3.66896	0.00127939	-3.30256	0.00207566	-5.20795	0.0340981
CLMN	-2.57553	0.00110141	-2.47836	0.000379738	-2.29066	0.0120397
CLMP			2.17073	3.21422e-05
CLNK	-4.18524	0.00209298	-4.11973	0.00149706
CLRN3	-6.41835	1.30391e-10	-6.27791	2.69213e-05	-6.9601	0.0172018
CLU	-2.21485	0.0222235	-2.10522	0.0349363
CMBL	-2.67316	1.58403e-05	-2.91173	5.23557e-05	-3.20321	0.00256709
CMTM3	2.61533	0.00396163	2.50906	0.00160305	2.80875	0.00983958
CMTM4	-2.36172	2.00246e-05	-2.25339	3.70887e-05	-2.97054	0.012257
CMTM7					2.40333	0.011994
CNDP1	-4.069	7.51693e-06	-4.26893	6.20529e-06	-4.16454	0.00778092
CNGA1	-2.69191	0.000442122	-2.97838	0.000419509	-3.27064	0.0222732
CNKSR1	-2.50567	0.000325858			-3.47269	0.0102087
CNR1	4.28705	4.52496e-07	4.26327	2.32776e-05
CNRIP1	2.27383	0.00207008	2.08585	0.00274833	2.81172	0.0141607
CNTFR	4.50984	9.60035e-06	5.69715	1.41487e-05
CNTN2	3.59998	2.63996e-09	3.73475	4.28836e-06
CNTN5	2.01588	0.00127375	2.53781	0.0113409
CNTNAP2	3.04396	5.18233e-06	3.78502	3.41998e-05
CNTNAP3	-2.2754	0.00237409	-2.41722	0.00175832
CNTNAP3B	-2.54144	0.00491275	-2.67853	0.00359531
COBL	-3.50469	6.24659e-11	-3.51764	2.66956e-05	-4.46453	0.00131819
COBLL1	-4.64078	4.06096e-07	-4.74035	5.50773e-05
COCH					-2.17339	0.0236732
COL13A1	4.05502	8.25546e-09	4.29732	3.65606e-05
COL14A1	2.90509	0.000183369	2.82703	0.000517642
COL16A1	2.18469	0.000306694	2.0762	0.00183767
COL18A1-AS1	-5.6288	0.000551219	-5.74056	0.000106347	-6.06932	0.0040095
COL19A1	-2.59995	0.000667995	-2.76383	0.000444994	-2.69976	0.0299363
COL1A1	4.74687	0.0125434	4.32209	0.0158125
COL1A2	2.94616	0.0160016	2.92346	0.0188722
COL25A1			2.52768	0.0160198
COL2A1	7.35391	1.15422e-08	8.81406	2.10316e-06
COL3A1	3.65807	0.0161108	3.46118	0.0182344	4.29822	0.0374908
COL4A3	-5.07745	6.42367e-10	-5.34951	2.94271e-05	-5.59652	0.0436458
COL4A4	-3.04732	4.36657e-06	-3.13638	0.00160108
COL5A1	3.12597	0.000770229	2.67944	0.0020008	4.11483	0.0403681
COL5A2	3.34601	0.000193252	2.91193	0.00094924	4.38561	0.00913586
COL6A2	2.35109	0.0125434	2.15553	0.0158693	3.03854	0.0211644
COL6A3	3.76066	0.00422964	3.69789	0.00691183	4.87843	0.00871283
COL6A6	2.26874	7.70368e-05	2.46812	0.000152587
COL8A1					3.47467	0.0440663
COL8A2	2.46209	0.00744303
COLCA1	-5.13223	6.56288e-10	-5.02887	4.91802e-05	-6.48857	0.00604832
COLCA2	-2.64805	0.0029605	-2.48528	0.00787549	-4.34313	0.0315125
COLEC12	3.09494	0.000372465	3.05881	0.000497474	2.75838	0.0297889
COLGALT1					3.09587	0.0151838
COLGALT2			2.35038	0.00317676
COMP	3.71813	0.0148434	3.22996	0.0273968
COMTD1	-2.00601	0.000394898	-2.11326	0.00028073
COPG2IT1			2.10094	0.00714919
CORO1C					2.36567	0.0443292
COX2	-2.14905	7.3038e-06	-2.18298	3.13589e-05
COX3	-2.39037	9.01715e-12	-2.36505	2.10316e-06	-2.43861	0.0089023
COX7A1	-2.17077	0.000544441	-2.47131	0.0019705
CPA3	2.21973	0.0463584
CPA6	2.62675	2.7502e-05	2.60878	0.0016011
CPEB2	-2.23354	0.000233838	-2.50189	0.000449284
CPEB4	-2.62325	0.000761591	-2.77324	0.000355107
CPNE7			2.06662	0.012838
CPT1A	-2.11344	1.35641e-07	-2.39557	1.26933e-05
CPT1C	3.4974	1.72059e-08	3.84355	1.60681e-05
CPXM1	3.57711	0.0195476	3.8249	0.0127191
CPXM2	-2.75838	0.000219543	-3.15904	0.000477982
CPZ	2.66608	0.0044776	2.55833	0.00564007
CRABP1	-2.02238	0.0083889	-2.14046	0.0113888
CRABP2			2.06159	0.00510734
CRB3	-4.47607	6.20653e-08	-4.07695	6.23733e-05	-6.61549	0.0141435
CRHBP	-3.71009	4.18148e-05	-3.81153	7.66592e-05
CRLF1	2.11726	0.0152544	2.05208	0.0210728
CRTAM	2.40631	0.000419621	2.21025	0.0084922
CRYAB	-3.08161	0.00383842	-3.30337	0.00319315
CRYBB3	-2.21866	0.00225129	-2.43976	0.00164848
CRYGD	2.71854	0.00625689	3.06805	0.00621391
CRYL1	-3.30299	7.21259e-06	-3.47925	8.0108e-06	-2.71304	0.0106944
CRYM	-4.07511	5.07758e-07	-4.09335	1.46329e-05	-5.47743	0.00179324
CRYZ	-2.67695	0.000974297	-2.39743	0.000952324	-3.20546	0.0177481
CTH					-2.1318	0.0497441
CTHRC1	5.52759	0.0046367	5.43335	0.00310267
CTSH			-2.07656	0.000646356
CTSK	2.11534	0.0141928
CTSL3P	-4.80632	0.00157172	-4.91028	0.000625791	-4.86701	0.0102087
CTSV	-2.01027	0.00514055			-2.70868	0.0345444
CTXN3	-6.55232	1.16696e-08	-6.63221	8.11899e-07	-6.6678	0.000933862
CUBN	-5.23962	1.0716e-06	-5.14562	4.87615e-06	-5.55949	0.00233986
CWH43	-6.57628	2.03089e-11	-6.37328	6.56565e-06	-7.28667	0.000804156
CX3CL1	-2.39952	6.70298e-07	-2.39705	0.000253503	-3.03647	0.029502
CXCL14	-6.50636	4.03123e-09	-6.19983	9.48075e-05
CXCR2P1	3.02317	0.0290984	2.62001	0.0490699
CXCR4	2.70612	0.00701344	2.46987	0.00990846	4.42945	0.0225033
CXCR6	2.66789	0.00214233	2.53391	0.011217
CXorf28	2.39427	2.02525e-05	2.53133	0.000248195
CXorf57	-3.08134	0.000339733	-3.6945	0.000179681
CXXC4	2.05169	0.00551454	3.05312	0.000241601
CYB5A	-2.57163	5.42963e-05	-2.44047	3.82903e-05	-2.60803	0.0145892
CYFIP2	-3.39712	0.0144641	-2.97555	0.0193977	-3.97237	0.0304881
CYP17A1			-2.0356	0.000147828
CYP24A1			-5.37298	0.0438179
CYP26A1	2.84123	0.000409223	3.11697	0.000945389
CYP27B1	-2.22971	0.0402298	-2.52032	0.0241576
CYP27C1	4.08503	3.43003e-10	4.53021	4.39329e-06
CYP3A4	-2.91324	0.00029835	-2.83004	0.00103037	-3.07811	0.0147827
CYP3A5	-2.31053	0.00156214	-2.09463	0.0038563
CYP3A7	-3.02672	1.09223e-06	-2.78458	0.000179829	-3.34847	0.0442199
CYP4A11	-4.99028	3.69711e-08	-5.06173	8.28413e-07	-4.66133	0.00257903
CYP4A22	-5.56568	3.72842e-13	-5.89827	6.4008e-07	-5.49737	0.00913586
CYP4F12	-3.17233	0.00107433	-3.5424	0.0006173	-3.18303	0.0137515
CYP4F3	-5.41152	0.000725045	-5.52326	0.000248221	-4.9421	0.0157046
CYP8B1	-5.52287	3.50945e-06	-5.5651	1.48321e-05
CYS1	-6.18416	6.22131e-10	-5.78231	1.61114e-05	-8.53622	0.0315713
CYSTM1	-2.67575	1.90194e-07	-2.8911	2.96611e-06	-2.00079	0.0328723
CYTB	-2.09476	1.46554e-08	-2.11489	3.49176e-06	-2.20158	0.0152708
CYTL1	4.15403	2.89264e-09	3.94019	3.62163e-06	4.07808	0.0113231
DACH2					-3.6955	0.0167405
DACT2					-2.34064	0.018896
DACT3	2.11826	2.86291e-05	2.18905	0.000102419
DAO	-6.78827	2.57921e-14	-6.63956	2.25362e-06	-6.44492	0.012257
DAPL1	3.50379	0.000660848	4.53911	0.000492157
DAPP1					3.85669	0.0437313
DCAF12L1	-3.40446	0.000340547	-3.26466	0.000738897	-3.84367	0.0109465
DCC			2.0075	0.0141273
DCDC2	-3.29817	8.34298e-06	-2.68014	0.00212677
DCHS1	2.23576	9.48713e-08	2.52661	1.34836e-06
DCLK1	2.18151	0.00490492
DCSTAMP	2.75362	0.00057876	2.69994	0.0121275
DCXR	-2.41241	2.97144e-05	-2.46881	3.27409e-05	-2.13436	0.00532371
DDC	-5.76786	1.95564e-13	-5.78824	7.5989e-07	-6.19492	0.00923479
DDHD1					2.23679	0.018167
DDN	-3.15547	0.0168985	-3.29371	0.00924319	-3.16203	0.0437131
DDO	-2.32269	7.09107e-05	-2.74556	0.000492101
DEFB1	-9.62192	3.32216e-14	-9.5549	3.49176e-06	-10.2761	0.00403113
DEPDC7					-2.24591	0.024207
DGCR10	-3.66237	0.0415432	-3.90444	0.0269339
DGKI			-2.19903	0.000947741
DGKK	2.73431	0.000234857	3.09791	0.00203667
DHDH	-3.31859	0.000256063	-3.19958	0.00016772
DHRS11					-2.03904	0.0466322
DHRS9	3.23913	0.000677323	3.42675	0.00644723
DIO1	-6.8505	1.95564e-13	-6.94776	6.73314e-07	-6.67052	0.00402268
DKK2	2.04975	0.00391609
DLGAP5	2.93364	0.0100404	3.18417	0.00591858
DLK1	2.03355	0.00836926	2.47523	0.00422599
DLK2			2.016	0.00835929
DLL3	3.37903	0.016705	3.80764	0.00901328
DMGDH	-5.00944	1.5699e-14	-4.87533	1.74439e-06	-5.71277	0.00364724
DMRT1	2.70861	7.3318e-05	2.61408	0.000125852	2.55276	0.0133075
DMRT2	-2.85789	6.89882e-05	-2.50265	0.000805116	-4.11103	0.00225251
DMRT3	3.74356	0.00324048	4.13429	0.00355273
DMRTA1	-3.20966	0.000126538	-3.5951	6.72155e-05	-3.27344	0.0132499
DMTN	-2.30794	3.7164e-05	-2.11936	0.000334391	-3.52067	0.0233705
DNAAF1			-2.34124	0.0145872
DNAH11			2.88429	0.041148
DNAJC6	-2.48315	0.0137364			-3.4222	0.0242054
DNASE1	-2.51579	6.95027e-06	-2.56596	1.87655e-05	-2.64306	0.0172606
DNASE1L2	-2.34318	0.0139956			-3.17478	0.0202572
DNASE1L3	-2.76729	0.0111782	-2.57291	0.0171476
DNER	-3.29785	6.02455e-08	-3.54424	0.000195277	-4.76603	0.0180724
DNMT3L	-5.15527	5.50104e-13	-5.34961	3.00907e-07	-4.65301	0.0132499
DOK1					2.40212	0.0472196
DPEP1	-3.06069	4.22986e-05	-2.33266	0.00437838
DPP10	2.6419	3.30211e-05	3.34678	0.000350781
DPP10-AS1	4.00439	6.70298e-07	5.14028	2.97276e-05
DPP4	-2.43089	0.000777842	-2.69349	0.00218412
DPY19L2P1	-2.22988	0.00812375			-3.10809	0.0229371
DPY19L2P2					-2.58415	0.0310324
DPYS	-8.26737	7.36605e-11	-8.02133	1.26405e-06	-8.07315	0.0164091
DPYSL3	2.40248	0.0261144	2.34585	0.0304827
DSCAML1	-2.1484	0.0171578			-3.70866	0.0395679
DSCC1	3.2427	0.000654054	3.39666	0.000314641
DSCR8	4.89268	3.76686e-05	5.8472	0.000125484
DSE					2.65898	0.0430678
DSG2	-2.00636	7.5536e-05
DTL	3.89593	0.0410602	4.12831	0.0283279
DUSP26					-3.08405	0.0319975
DUSP4	2.0522	0.00156832
DUSP5P1	3.10918	2.53727e-05	2.84537	0.000405122
DUSP9	-3.49147	0.00907041	-3.25996	0.00621391	-3.31715	0.030681
DYDC2	2.03151	0.000748873	2.20981	0.00991282
E2F7	2.64512	0.0193592	2.64075	0.013841
E2F8	2.88478	1.49451e-06	2.8297	0.00017654
EAF2	-2.40259	4.76232e-08	-2.48556	2.5552e-05
ECEL1	3.9651	0.00340156	5.28815	0.000781495
ECHDC3	-2.24898	0.0105943	-2.44446	0.00430722
EDDM3A	-3.11627	0.0149191	-3.2025	0.00783521	-3.06506	0.0397006
EDNRA	2.28852	0.000259719
EEPD1					2.75111	0.026191
EFHD1	-4.08523	0.000255955	-4.06194	0.000122226	-5.33181	0.00289138
EFS	2.10292	0.00527088	2.44114	0.00284521
EGF	-9.44157	0.00019477	-9.46387	3.0323e-05	-9.39275	0.00503763
EGFLAM	2.00813	0.023894	2.37808	0.0115001
EGOT	-5.36677	7.16708e-08	-5.16533	5.74311e-05	-6.57376	0.00225251
EHBP1L1					2.77069	0.0363689
EHD3	-2.35944	0.0214608	-2.49364	0.0118043	-2.21795	0.0446407
EHF	-5.67454	3.16172e-10	-5.68278	5.77404e-05	-5.61711	0.0211644
EHHADH	-3.6345	2.82444e-08	-3.36254	2.13413e-06	-4.33399	0.0188378
ELF3	-4.59372	1.07801e-06	-4.05919	0.000775057
ELF5	-6.39709	0.000116431	-6.35076	3.40789e-05	-6.78047	0.0027034
ELMO3	-3.10095	0.00547451	-3.11199	0.00381849	-2.93042	0.0255974
ELMOD1	-2.236	0.0111467	-2.08816	0.0241745	-3.58635	0.0135935
ELOVL2	4.84154	3.39098e-05	5.42509	2.33487e-05
ELOVL2-AS1	2.44847	2.36699e-05	2.62984	0.000886594
ELOVL4	3.37238	4.30123e-06	3.41151	9.17044e-06	2.21603	0.0436117
ELOVL7	-4.15356	1.96562e-07	-3.8423	2.76422e-05	-5.61783	0.0130352
EMB	2.16844	0.0188176	2.06565	0.0224816
EMC3-AS1			2.00151	2.50035e-05
EMCN	-2.04758	0.000540432
EME1	2.32145	0.0350446	2.16095	0.0321645	2.6204	0.0438279
EMILIN2	2.67056	0.00872651	2.39541	0.0144602	4.31198	0.045697
EMX1	-2.80554	1.07408e-10	-2.85021	2.10316e-06	-2.6892	0.00921138
EMX2	-2.2242	0.00347035
ENAH	2.57163	8.9072e-12	2.47826	2.94111e-06
ENAM	-3.49915	1.54898e-08	-3.61812	1.92492e-05	-3.50116	0.00691015
ENC1	2.98427	0.0139241	3.39478	0.00716886
ENPEP	-2.11129	0.00897283			-3.69243	0.0253958
ENPP3	-2.04779	3.46053e-08	-2.06316	0.000156834	-2.1063	0.045697
ENPP5	-2.0629	0.00174967
ENPP6	-4.78145	2.34905e-09	-4.75929	4.76046e-06	-5.06227	0.000891639
ENPP7	-2.2224	0.00216805	-2.56936	0.00129114
ENTPD2					-2.05429	0.0212386
ENTPD3					-2.72702	0.0313203
ENTPD3-AS1	-2.29388	0.0241049	-2.48001	0.0145662
ENTPD5	-2.61505	0.000208986	-2.80624	5.57196e-05	-2.21695	0.0377538
ENTPD8	-2.94738	7.51924e-06	-3.15499	8.86012e-05	-4.24338	0.0192848
EOMES	2.82587	4.16547e-06	2.70069	0.0011895
EPB41L4B	-2.6234	0.00149606	-2.74122	0.000848296	-3.39571	0.035999
EPCAM	-3.12189	0.00128536
EPHA1	-2.41872	0.0333409	-2.5431	0.0254271
EPHB1	2.0618	0.0109941
EPHB2	2.12531	0.0027265			2.63053	0.0158533
EPHB3			2.06565	0.00942956
EPHX2	-3.17884	4.31017e-09	-2.83799	2.53754e-06	-4.8793	0.0378224
EPN3	-2.27547	0.00630904
EPOR					-2.1551	0.00532371
EPS8L2	-4.26875	1.83596e-06	-4.32015	1.57358e-05	-4.80846	0.0106944
ERBB3	-3.14558	4.60319e-05	-2.96903	3.1987e-05	-3.69978	0.00254683
ERBB4	-3.58422	2.31582e-09	-3.15381	0.000131323	-5.53424	0.0144151
ERICH2	-2.36649	0.00587395	-2.50491	0.00524913	-3.70711	0.0392129
ERP27	-4.72244	5.72855e-10	-4.53704	8.36693e-05
ESCO2	3.30483	0.0223686	3.28167	0.0161603
ESPN					-2.06932	0.0169934
ESRP1	-3.06382	4.96485e-06	-2.97659	0.000514951	-3.9239	0.00327354
ESRP2	-2.65499	4.86945e-05	-2.33682	0.000325844	-3.89427	0.00305129
ESRRB	-2.41275	0.000471584	-2.62963	0.000151602	-2.46897	0.0127845
ESRRG	-3.37269	6.81374e-11	-2.98353	1.97824e-05	-4.0315	0.0065722
ETNK2	-2.43655	0.000257024			-4.30369	0.0168083
ETNPPL	-4.46094	1.4556e-05	-4.7667	1.11142e-05	-4.6306	0.00420653
ETV1	2.85286	0.00155183	3.08736	0.000907455
ETV4	3.82355	0.00812375	4.59633	0.0034955
ETV5	2.36938	0.0299609	2.64272	0.0163692
EVPLL					-2.287	0.0308396
EXOC3L4	-2.20811	8.96161e-06
EXPH5	-2.282	7.15632e-09			-3.91363	0.0356769
EXTL1	2.87294	0.00434185	2.97668	0.0027674
EYA1	4.73967	7.32883e-09	5.45657	3.66792e-06
EZH2	2.65751	0.00120367	2.99407	0.00037448
F11	-6.24659	2.7351e-11	-6.09541	2.10316e-06	-6.7564	0.00402268
F2RL1	-3.64216	1.85333e-07	-3.48585	0.000264831	-3.58268	0.0292764
F2RL2	2.92767	0.00778824	3.21651	0.00595095
F5	-3.49123	0.00477978	-3.95891	0.00182522
FA2H	-5.92416	2.55785e-10	-5.50249	1.19355e-05	-7.66863	0.000933862
FABP1	-7.05505	2.93407e-07	-7.29806	7.39085e-07	-6.79854	0.000933862
FABP3	-3.44174	3.27521e-06	-3.63521	7.21948e-05
FABP5	3.23314	0.00363796	3.05437	0.00380999	4.52059	0.0333369
FADS2	2.16184	0.0386981	2.11679	0.0321645
FAIM2	2.9989	6.18711e-07	3.59967	2.66956e-05
FAM101A	2.5517	0.000799613	2.06463	0.00324195	2.87485	0.020119
FAM110C	-2.54473	0.000149322	-2.30751	0.00116847
FAM131B	2.24177	3.95714e-05	2.2995	0.000669566
FAM132A					-2.0434	0.0379618
FAM134B	-2.0218	0.000645599
FAM149A	-2.70854	1.96154e-05	-2.48487	0.000226546	-3.69569	0.0202632
FAM151A	-6.76498	1.77248e-12	-6.70284	6.40174e-07	-6.57415	0.000804156
FAM153A	-2.04186	2.0943e-05	-2.70928	8.46477e-06
FAM153B	-2.23008	0.0235737	-2.96957	0.00755471
FAM153C			-2.23784	0.044574
FAM181B					-2.58158	0.0270577
FAM189A2					-2.0779	0.00794071
FAM20A					2.27474	0.00598365
FAM217A	-2.99967	0.0257601	-3.19091	0.0162796
FAM222A					-2.7529	0.0333127
FAM26D			-2.62177	0.0417294
FAM27A					-2.0725	0.0325375
FAM3B	-4.88367	8.62642e-08	-4.40445	3.32679e-05
FAM46B	-2.03428	0.00173208
FAM49A	2.86371	0.0328061	2.63044	0.0482677
FAM49B					2.13367	0.0433545
FAM64A	3.4675	0.0163205	3.9161	0.00825221
FAM65C					-2.15187	0.0416286
FAM78A	2.11313	0.00636687			3.89351	0.01672
FAM78B	2.13688	2.6333e-05	2.20858	0.00342652
FAM81B			-2.52896	0.0444889
FAM83B	-4.78584	2.30279e-11	-4.9468	1.56393e-05	-5.55196	0.000804156
FAM83D			2.19198	0.0264604
FAM83F	-2.67356	4.3381e-05	-2.84334	5.37774e-05	-2.60638	0.00977685
FAM84B	-2.80373	0.000438974	-2.67568	0.00229092	-4.92108	0.0339675
FANCA	2.65871	0.00488273	2.9728	0.00217023
FANCD2					2.07923	0.0152708
FANCI	2.23377	0.00822961	2.31419	0.00423012	2.29811	0.0467928
FAP	3.9404	0.0421861
FAXC					-2.0917	0.0379548
FBLL1	2.34082	0.0238377	2.54595	0.012385
FBLN1	2.37378	0.0180332	2.57411	0.0202856
FBLN2	2.43054	1.71924e-05	2.0005	0.000321311	3.20451	0.00945926
FBLN7	2.286	9.32691e-07	2.15719	3.24537e-05
FBN1	2.35883	1.63402e-05	2.16645	0.000360512
FBN2	4.67449	0.00603551	4.85584	0.00496694
FBN3			2.17976	0.0133618
FBP1	-4.83111	2.67774e-08	-4.8053	3.04967e-05
FBP2			-2.20642	4.67327e-05
FBXL16	-2.60941	0.0397633
FBXO2	-2.45778	0.00270064	-2.13797	0.0103933	-3.85451	0.00684217
FBXO41	2.56034	0.00576855	2.49136	0.00484786	3.77384	0.00917608
FBXO5	2.0579	1.14465e-07	2.30366	5.22294e-05
FCAMR	-4.68539	0.000186742	-4.96296	9.1451e-05	-4.71735	0.0110372
FCGR2C	2.67171	0.0437052
FCHO1					2.9973	0.0142997
FDCSP	3.51978	0.00120437	3.84679	0.0125969
FFAR3	2.48902	0.0220419	2.11266	0.0327455
FGD4			-2.19298	7.12968e-05
FGF1	-3.82574	0.0193727	-4.15003	0.0118364
FGF9	-5.21524	3.39399e-08	-5.19783	7.21948e-05	-7.37291	0.00722155
FGFR3	-3.6659	0.00939507	-3.4628	0.00681796	-4.9605	0.012257
FHIT	-2.06513	1.45215e-08			-2.50161	0.0104512
FKBP10	3.55155	0.00146422	3.42043	0.000397359	3.34881	0.0102087
FKBP7	2.65407	5.15191e-10	2.68304	8.28413e-07
FLJ13744			-2.08655	0.0150776
FLJ22763	-6.01413	3.06114e-10	-6.3086	5.23018e-06	-6.2445	0.00941157
FLJ30901	2.21829	0.00330239	2.44528	0.00570728
FLJ35934	2.29877	0.0111954	2.30046	0.00772294
FLJ38379	2.94877	6.58321e-07	3.61144	1.8112e-05
FLJ46552	-2.48343	0.00476541	-2.48083	0.00575599	-3.83667	0.0200236
FLRT2	2.23638	0.00741766	2.44992	0.0048995
FLT1	-2.07483	0.0130387	-2.37003	0.00773449
FMNL1					3.21885	0.0221269
FMO1	-5.00438	1.98358e-08	-5.10586	1.69308e-05	-5.19533	0.00126731
FMO4	-2.95657	9.70883e-05	-3.04752	9.78277e-05	-3.109	0.00562104
FMO5	-3.48777	0.001585	-3.5328	0.000510292	-3.25749	0.0319519
FMOD	3.37939	0.0107731	3.04885	0.0128276
FN1	2.51314	0.00268042
FOLH1	-2.39409	8.10167e-07	-2.28246	0.00165823
FOLH1B	-2.21172	0.000599998
FOLR1	-4.77954	0.000638743	-4.64017	0.000375665	-6.01152	0.00759046
FOLR2	2.06025	0.00954076
FOLR3	-4.945	0.00119919	-4.85898	0.000449284	-5.37867	0.0077461
FOXD1			2.9184	0.0227869
FOXI1	-8.43186	2.40419e-14	-8.23835	3.62276e-06	-8.79674	0.000804156
FOXM1	2.29022	0.0345266	2.56171	0.0223815
FOXO6			2.11951	0.00180089
FOXQ1	-5.7412	7.62237e-08	-5.76463	0.000510329
FPR3	2.8448	0.0138415	2.52041	0.0248749
FREM1					-4.24934	0.028971
FREM2	-2.34415	0.00295846			-5.23225	0.0220078
FRK	-3.11796	1.18753e-07	-3.3379	2.12048e-05	-3.53272	0.0157046
FRMD1	-2.17383	0.000239792	-2.29906	6.32492e-05	-2.12667	0.0370602
FRMD3	-3.17229	2.78534e-10	-3.12376	3.52134e-05	-4.14365	0.0303638
FRMD5	2.54581	3.96454e-06	3.14305	2.40561e-05
FRMD6					2.00045	0.018811
FRMD7	-4.52645	6.28426e-11	-4.64579	3.08278e-06	-4.86174	0.00738389
FRRS1L	2.95107	5.0636e-07	3.13341	5.28493e-05
FSCN1	2.76127	0.000359246	2.72652	0.000113745	2.45719	0.0108298
FST			3.78505	0.0499018
FSTL1	2.12154	0.00111195
FSTL4	-2.91459	6.06441e-05	-3.03399	0.000176934	-3.54269	0.0162622
FTCD	-6.66789	1.58185e-11	-6.13757	1.46692e-06	-8.76371	0.000951174
FTCDNL1			-2.36939	0.00227501
FUT3	-4.00797	2.74373e-06	-4.14765	5.82901e-05
FUT5	-3.84822	3.78466e-08	-3.90584	1.822e-06	-4.00314	0.0044059
FUT6	-2.46586	8.3398e-08	-2.4657	9.47401e-07	-2.40914	0.00599586
FXYD2	-7.20167	8.60477e-12	-7.21222	3.73331e-06	-7.43345	0.0180784
FXYD3	-2.04849	0.0239439	-2.1396	0.0189263	-2.26533	0.0457756
FXYD4	-9.10253	0.000532725	-8.77096	0.000143773	-9.85739	0.0104565
FZD10			6.25165	0.0407814
FZD2	2.10293	0.00483355	2.29694	0.00261399
FZD7	2.38212	0.0260832	2.63451	0.018948
G0S2	-2.58562	0.00757626	-2.40449	0.0141652
G6PC	-8.74968	4.86945e-05	-8.82813	4.66504e-06	-8.63588	0.00175908
GABBR2	4.237	7.86575e-06	5.14406	0.000271895
GABRA2	-4.56108	3.07096e-07	-4.56791	9.47839e-05	-5.02491	0.00859312
GAD1	-4.36315	2.32373e-10	-4.36323	1.56173e-05	-5.19816	0.0180724
GADL1			-2.98559	0.0328875
GAL3ST1	-4.24192	0.00149194	-3.64736	0.00260236	-6.72424	0.00488461
GAL3ST4	3.98747	3.28464e-06	3.49343	3.65285e-05	5.29367	0.0366872
GALNT1					2.14457	0.00520103
GALNT14	-4.21639	1.25954e-05	-4.31483	0.000182463	-4.30423	0.0425418
GALNT18					-2.52434	0.0406132
GALNT3	-2.38731	0.0013901	-2.44954	0.002187
GAS1			2.13986	0.0172585
GAS7	2.67964	0.0288485	2.39628	0.0348613
GATA2	-3.02974	0.00280267	-3.13858	0.00336617	-2.75963	0.0329011
GATA3	-4.62462	6.40713e-07	-4.08675	0.000177656
GATA3-AS1	-4.76706	5.15372e-10	-4.47521	3.37974e-05	-5.64379	0.00811121
GATA6-AS1			2.07631	0.00691809
GATM	-4.52981	1.63669e-12	-4.15698	8.28413e-07	-5.01552	0.026191
GBA3	-7.84093	4.35607e-08	-7.69974	9.00855e-06	-8.7316	0.011072
GCGR	-7.45966	2.55785e-10	-7.55885	3.46743e-06	-9.10909	0.00833155
GCNT1	2.21904	0.0186745	2.07441	0.0208782
GCNT4	-2.98115	2.98029e-05	-3.43641	5.56656e-05	-2.73837	0.0368364
GDA	-5.63434	0.00250863	-5.54949	0.000749812	-5.66332	0.0141998
GDF1	3.89705	3.72373e-05	4.19903	6.47443e-05
GDF15	-3.92427	0.0130378	-3.64728	0.0129213
GDNF	2.92883	0.00146175	3.43341	0.001151
GDPD3					-2.46763	0.0135935
GFRA4	2.15431	0.0158141	2.47557	0.00789855
GGT1	-2.99557	0.00188953	-3.07489	0.00040739	-2.66876	0.0136949
GGT3P	-3.08631	0.00312332	-2.98763	0.00116872	-3.29467	0.0172811
GGT6	-3.50286	0.00108329	-3.52444	0.000353641	-3.51646	0.00722155
GGT8P	-3.83385	1.25348e-05	-3.82879	0.000137651	-3.62005	0.0338481
GGTA1P	2.06922	0.0185632
GGTLC1	-4.33277	0.000123653	-4.42257	4.38195e-05	-3.67143	0.027265
GGTLC2	-3.67396	6.12511e-05	-3.73467	3.02959e-05	-2.988	0.0220078
GHRL			2.35027	0.0045553
GINS1	2.0977	0.0401665	2.46749	0.0228814
GINS2	2.86233	0.000587939	3.12625	0.000350428
GINS4	2.24163	0.00127419	2.49015	0.000739655
GIPC2	-4.44553	0.00068864	-4.39955	0.000418179	-4.80939	0.00690791
GJA3	-3.54265	0.00200492	-3.26352	0.00980521	-4.36096	0.0425913
GJB1	-3.68805	6.35989e-05	-3.81273	0.00027606	-4.73424	0.00776604
GJB2	-3.69154	1.96463e-05	-4.23316	0.000340824
GJC1	3.60031	8.77237e-05	3.57534	2.97276e-05	3.14221	0.0133782
GK	-2.13561	0.00904053	-2.50258	0.00518758
GK3P	-2.16385	0.00108214	-2.44427	0.00110644
GLDC	-6.00885	1.51287e-13	-5.89497	6.79714e-06	-6.66148	0.00331179
GLI3	2.4173	8.1984e-08	2.33424	1.3273e-05
GLIPR1	4.17554	0.00104905	3.9423	0.00112941
GLIPR2	3.20589	0.0126873	2.86373	0.0124078	3.91373	0.0139377
GLOD5	-3.57198	0.000634675	-3.21104	0.00144895	-4.48742	0.00581072
GLRX	-2.28171	1.81031e-06	-2.58576	2.12302e-05
GLS	-3.69715	3.31258e-08	-3.71239	6.00165e-06	-3.50128	0.0287687
GLTPD2	-2.59252	6.92425e-06	-2.54199	5.09732e-06	-2.77439	0.00131819
GLYAT	-7.7086	7.42733e-13	-7.86706	8.29924e-07	-7.88941	0.00653406
GLYATL1	-6.584	1.39602e-10	-6.60301	7.5989e-07	-6.43742	0.00225251
GLYCTK	-2.23504	0.000556278	-2.21501	0.000605295
GNG2	2.06007	1.12494e-05	2.38195	2.49978e-05
GOLGA2P5					-2.55938	0.035185
GOLT1A	-4.39224	1.44956e-10	-4.36266	2.19733e-05	-4.73921	0.00254683
GOT1	-2.54049	0.000493229	-2.39899	0.000255164	-2.45619	0.0185013
GP2	-5.62433	0.00673772	-5.69335	0.00226906	-5.59108	0.0249875
GPC2	3.60959	1.78859e-06	4.01042	1.72744e-05
GPC5	-3.67732	0.00183195	-2.98288	0.00842979	-5.7766	0.00520103
GPD1	-4.23277	8.71359e-09	-4.52469	8.11899e-07	-4.74172	0.000953443
GPHN					-2.29773	0.00707147
GPR110	-4.09465	4.30444e-07	-3.89867	4.09796e-05	-6.12083	0.0131003
GPR116	-2.36042	0.000197062	-2.19553	0.00142132
GPR123					-2.4156	0.0239572
GPR124	3.0035	0.000108016	2.88334	0.000100261	2.85631	0.0065722
GPR137C	2.55943	6.31579e-06	3.13006	7.98575e-06
GPR155			-2.01625	0.00500551
GPR158	3.63239	2.46045e-06	4.63519	3.70158e-05
GPR160	-3.35894	3.92246e-06	-3.28016	0.000129889
GPR171	2.18456	0.000582098	2.00598	0.00635764
GPR19	2.74453	0.00449141	2.97601	0.00480967
GPR56	-3.30304	2.49136e-08	-3.05017	3.25352e-05	-3.43656	0.0263077
GPR64	6.34067	0.000463701	7.30079	0.000390731
GPR65	2.2182	0.0132298	2.07215	0.0213722
GPR68	2.7023	0.0391035
GPR98	-3.67744	0.000814656	-3.65568	0.00167052
GPRC5B	-2.31543	1.05308e-07			-3.0936	0.00124198
GPRC5C	-2.18804	0.0151236	-2.08816	0.0163324
GPT	-3.71892	0.00296479	-3.8215	0.000787834	-3.92014	0.0102605
GPX3	-5.37498	4.18148e-05	-5.50445	1.06744e-05	-4.80904	0.0225116
GPX7	2.07588	0.0143425	2.22441	0.00690628
GPX8	2.13181	0.00207199	2.03784	0.000795403
GRAMD1C	-3.38654	7.964e-06	-3.02369	0.00014056
GRAMD2	-2.16613	0.0299207	-2.58448	0.0204574
GRB14	-5.69133	4.94985e-09	-5.83039	0.000154358	-7.41226	0.0369292
GRB7	-2.12233	0.000197294
GREM1	2.46617	0.000634675	2.02475	0.0149093
GRHL1	-2.00942	0.000165015
GRHL2	-2.06623	0.0328658			-2.86792	0.0379686
GRIA3			-2.08446	0.035113
GRIK1	3.83702	1.39524e-05	4.01509	0.00164932
GRIN2D	3.15076	0.00685757	3.25805	0.00330419	3.72525	0.0151838
GRK6					2.19223	0.00553698
GRM2					2.05573	0.0458688
GRTP1	-2.39589	3.57182e-05
GSTA2	-6.50967	0.000844804	-6.48714	0.000156261	-6.97811	0.00503763
GSTA5	-8.88118	8.33215e-07	-8.64457	2.8607e-06	-9.99091	0.000933862
GSTA7P	-5.14176	0.000106419	-5.34322	2.56329e-05	-5.00507	0.00254683
GSTM1					-2.34943	0.0308396
GSTM3	-2.61565	0.0108439	-2.57395	0.00625115	-3.23196	0.0249431
GSTT1	-3.28545	0.000890929	-3.39417	0.0225231
GTSE1			3.55053	0.040333
GTSF1	2.21882	0.000149221	2.03775	0.0160464
GULP1	-2.99866	9.15297e-06	-3.27355	0.000466971
GXYLT2	3.38071	0.000895087	3.04995	0.000843856	3.29923	0.0367593
GYLTL1B	-2.08469	0.0213001			-2.87623	0.0253958
H2AFY2			2.13772	0.000736184
H2BFM	3.61613	3.55044e-06	4.0404	5.89376e-06
HAMP	3.14315	0.000439747	2.73219	0.00201958	5.86537	0.0195065
HAO2	-9.03733	8.58681e-15	-9.10302	6.4008e-07	-8.82037	0.00327354
HAPLN3	2.82194	0.0258666			3.92359	0.0234513
HAS2	5.56178	6.19388e-10	5.78405	5.54497e-06	5.59093	0.0300049
HAS2-AS1	2.65937	3.64811e-06	2.85892	0.000163468
HECW1	-4.19007	0.0207732	-4.50507	0.015086
HELT	-2.63162	0.027216	-3.01479	0.0165569
HEPACAM2	-6.20303	3.4262e-08	-5.9087	2.66521e-05	-6.84561	0.000933862
HEPH					2.0883	0.0203691
HEY1	2.09083	0.0242384	2.22425	0.0194189
HGD	-6.98833	8.77561e-13	-6.91057	2.30127e-06	-7.41977	0.020541
HHIP	-2.03318	0.00386008	-2.33166	0.0113154
HHLA2	-2.84275	0.00421336	-2.76818	0.00205247	-2.81839	0.0184497
HIBADH					-2.24855	0.0308518
HIBCH					-2.08517	0.0104565
HIC1	2.26249	9.17917e-07	2.52582	1.29747e-05
HIST1H1B	3.41427	0.0288055	3.37599	0.0211717
HIST1H2AG	3.22738	0.0318418	3.30442	0.0207001
HIST1H2AI	3.64282	0.0265062	3.81776	0.0149578
HIST1H2AL	2.61568	0.0344747	2.71686	0.0254769
HIST1H3B	3.08114	0.0268176	3.14472	0.016939
HIST1H3D	2.32121	0.0221133	2.39034	0.0158801
HIST1H3F	2.5425	0.0193502	2.62901	0.0131632
HIST1H3I	2.06403	0.0162522	2.36306	0.00905972
HIST1H3J			2.12419	0.00216994
HIST1H4F	2.12723	0.0288014	2.27521	0.0176337
HIST3H2A	2.76973	0.00214837	2.72891	0.00295677
HKDC1	-2.12518	0.00826115	-2.10657	0.00896284
HLA-DMB					3.42689	0.0198753
HLF	-2.84786	5.96883e-06	-2.49639	0.000226889
HMCN1	3.30726	0.0012171	3.78609	0.000490958
HMGA2	2.84829	4.86159e-05	3.16949	6.80062e-05
HMGCS2	-7.26827	0.00782182	-7.01069	0.00347156	-8.25127	0.028886
HMP19	-2.17921	7.00433e-05	-2.23354	0.00717219	-2.14991	0.0163404
HNF1A	-3.09649	0.00116488	-3.27011	0.000439476	-3.04321	0.0100577
HNF1A-AS1	-5.48572	5.03689e-10	-5.55387	9.65444e-06	-6.37253	0.00520103
HNF1B	-3.33093	0.000698436	-3.40578	0.000457332	-3.2772	0.0412475
HNF4A	-3.49985	0.00448558	-3.77986	0.00223701	-3.56897	0.0304881
HNF4G	-2.78194	0.00957065	-3.04031	0.00503605	-2.70458	0.0295328
HOGA1	-4.40233	2.7424e-08	-4.28081	3.55006e-06	-4.42705	0.0180724
HOOK2					-2.13392	0.00722155
HOTAIR	2.54201	0.00271192	2.67289	0.00380196
HOXA11	2.28172	0.00030949	2.98297	7.8656e-06
HOXA11-AS	2.00545	0.0210408	2.34873	0.0130437
HOXB3					-2.34745	0.0203334
HOXB6	-2.27119	0.00697661			-4.79355	0.00553698
HOXB8	-2.23637	0.00909232			-5.59189	0.00272568
HOXB9	-2.24003	0.0149724			-4.8904	0.0283183
HOXD-AS1					-2.93116	0.018581
HOXD1					-3.97107	0.00956206
HOXD8	-2.00203	1.44713e-05			-3.53553	0.0212386
HPCA			2.23467	0.0380713
HPD	-6.57938	0.000230899	-6.71856	6.66514e-05	-6.88071	0.00338372
HPGD	-2.24788	5.42963e-05
HPN	-5.42924	8.6687e-11	-4.93221	6.68322e-05	-7.14294	0.0238049
HRASLS2	-2.74066	0.0048273	-2.68145	0.00278514	-3.04369	0.0212386
HRG	-8.62894	3.79572e-05	-8.82094	9.98203e-06	-7.7306	0.0227279
HRK	2.88229	0.00116043	3.59587	0.00111458
HRSP12	-3.31275	3.62327e-05	-3.25455	8.0108e-06	-3.64431	0.0014104
HS3ST2	4.14755	1.35513e-05	3.84786	0.000353423
HS6ST2	-3.36771	9.70223e-07	-3.25528	8.7341e-05	-5.55993	0.020119
HSD11B2	-5.86461	1.97817e-11	-5.00422	9.17044e-06	-8.4052	0.0291109
HSD17B8					-2.41994	0.016717
HSF2BP			2.18611	3.67655e-05
HSPA12A	-2.26148	4.97041e-07	-2.38709	0.000982656	-2.88135	0.0248398
HSPA4L	-3.15373	5.36383e-07	-2.99057	6.11275e-05	-4.14197	0.0133782
HSPB8			-2.34296	0.0495134
HTR1F	5.60292	0.00825798	6.38039	0.00329084
HTR2B	2.75049	0.00120974	3.14894	0.000599365
HYAL1	-3.88812	6.94271e-05	-3.81303	7.13246e-05	-4.80067	0.0156287
ICA1	-2.24009	1.50314e-07	-2.45813	0.000125484
IDNK	-2.48301	0.00340128	-2.52493	0.000849832	-2.15869	0.0172418
IDO1	2.0028	0.0253274
IDO2	-2.01054	0.0480736	-2.3483	0.0273745
IFI16	2.07834	0.0103505			3.13638	0.0319975
IFNAR2					2.02808	0.0233136
IGANRP					4.34998	0.0335473
IGDCC3			2.63782	0.00604503
IGDCC4	3.88849	0.0157188	3.94619	0.00965746
IGF2	4.17962	5.16124e-08	4.81191	1.03793e-06
IGF2-AS	3.4137	2.74332e-06	3.99268	5.19004e-05
IGF2BP1	-2.24478	0.010432	-2.44006	0.0274473
IGFALS	-2.67733	2.61888e-05	-2.42964	9.86312e-05	-3.24195	0.00323721
IGSF11					-3.1076	0.0130601
IGSF21			2.38452	0.00502208
IGSF3					-3.03993	0.0059495
IGSF9			2.34833	0.00021343
IHH	-5.73256	9.16872e-12	-5.8529	3.3284e-06	-6.43927	0.000481118
IKBIP					2.36311	0.0166294
IL10	2.13195	0.0263357
IL13RA2	-4.03594	1.90197e-05	-3.99375	0.000104951	-4.34535	0.0442199
IL17D	2.72938	0.00576855	2.71077	0.00733392
IL17RB	-3.06459	0.00129943	-2.82403	0.0007164	-3.73838	0.0132499
IL1R2	-2.76057	0.0023404	-2.95844	0.0019798
IL20RB					2.00325	0.0268416
IL22RA1	-3.18561	0.00990732	-3.17744	0.00745043
IL2RB	2.7699	0.0297447	2.62841	0.0298417	3.94215	0.0292764
IMPA2	-3.76754	0.000934673	-3.69854	0.000517489	-3.54877	0.0188764
INA			2.08905	0.0157872
INADL					-2.35221	0.0449697
INHBA	3.15902	0.00028465	2.65196	0.00930775
INPP5J	-3.52257	5.87092e-05	-3.34696	4.56652e-05	-4.30356	0.0110715
INS-IGF2	2.49576	0.0472852	2.78322	0.0334784
IQUB	-2.79134	5.66861e-06	-3.00387	1.31338e-05	-3.16562	0.00878827
IRF6	-4.53294	4.16082e-10	-4.45549	0.000113005	-5.58732	0.00247259
IRX1	-7.20719	8.90596e-06	-6.83274	6.46816e-05	-8.04408	0.0271606
IRX2	-6.8426	1.97037e-06	-6.39638	0.000130722	-7.29887	0.00233986
IRX3			-2.42526	0.0421264
IRX5	-3.39739	0.0174593	-3.60485	0.0136771
ISG15					2.44144	0.0320641
ISLR	3.1204	0.00542022	3.02065	0.00846291	3.09879	0.0336844
ITGA2	-2.37737	1.50802e-06	-2.68018	0.000789997
ITGA8			2.71544	0.0149183
ITGB3	-2.96586	0.00836276	-3.68608	0.00324195
ITGB6	-4.424	0.00281253	-4.5072	0.00221971
ITGB8	-2.21515	2.93364e-07	-2.16586	0.000437334	-2.98156	0.0189805
ITIH1					2.38941	0.0321275
ITIH5			-2.10283	0.000431942	-2.12368	0.0372283
ITLN1	-4.84118	0.00265479	-4.57527	0.00758713
ITLN2	-2.17047	0.0168445	-2.22895	0.0179861
IYD	-4.91434	2.37994e-11	-4.97128	6.3367e-07	-5.01635	0.000933862
JUP					-3.00931	0.0104565
KAZN					-2.04598	0.0367776
KBTBD11					-2.66207	0.0254798
KBTBD12	-2.11715	0.0230924	-2.23825	0.015129	-2.2827	0.0478857
KCNC1	2.51556	1.85958e-05	2.93424	0.000851895
KCNC2	2.58482	0.0130518	3.87899	0.00846066
KCNC4	-2.69678	1.46982e-07	-2.86921	8.44369e-06
KCNE1	-2.93433	0.00595804	-3.26136	0.00411994
KCNE1L			2.62023	0.0121498
KCNE4					3.22396	0.028971
KCNG1	3.25208	2.34035e-07	3.37563	0.000167098
KCNG3			2.03478	0.0146962
KCNH2	2.29199	0.00508839	3.06806	0.00109248
KCNH6	-4.59397	1.67445e-05	-4.53652	1.17535e-05	-4.83645	0.00233986
KCNH8	3.38866	3.82858e-07	3.9705	0.000106563
KCNIP4	-2.46273	0.0245504	-2.29159	0.024844
KCNJ1	-8.40787	5.63092e-15	-8.37557	2.25362e-06	-8.86153	0.00233986
KCNJ10	-6.81042	1.22471e-13	-7.08531	1.33187e-06	-5.34255	0.0498299
KCNJ13	-2.0421	0.00913552	-2.14696	0.00429
KCNJ15	-3.67212	1.3459e-07	-3.17543	0.000606483
KCNJ16	-7.29747	2.87e-10	-6.81579	3.97916e-05	-9.32068	0.0332041
KCNJ3	-6.19435	7.15191e-05	-6.43666	2.70705e-05	-5.89758	0.0118685
KCNJ6			2.68707	0.0340481
KCNJ8	2.17908	0.00181349	2.46529	0.00091813
KCNK12	3.30226	1.13512e-05	3.08112	0.000258708	2.70268	0.0180724
KCNK13	-3.14537	0.0264057	-3.37264	0.0185521
KCNK2	4.99769	8.76152e-08	5.44568	4.08686e-06
KCNK5	-2.58487	1.36016e-05			-3.68875	0.0490823
KCNN1	3.10892	3.65452e-07	3.36228	4.39507e-05
KCNT1	2.05047	0.000219421	2.36435	0.000543149
KCTD8	-2.63569	5.74372e-06	-2.60771	0.00160501	-3.9171	0.0269844
KDELC1	2.21298	0.000346458	2.29027	0.000234196
KDM2B			2.01336	0.00140758
KHDC1			2.02587	0.00226921
KHK	-4.96407	2.84896e-15	-4.91322	7.17993e-07	-4.66347	0.000804156
KIAA0101	3.33996	0.0305659	3.69583	0.0185357
KIAA0226L	2.79237	0.023019	2.49878	0.0302292	4.681	0.0133782
KIAA0509	-2.06759	0.00479067	-2.41433	0.00239636
KIAA1024	2.00647	0.000134516
KIAA1199	2.74782	1.31291e-05	2.19935	0.000603838
KIAA1210	2.90126	2.7555e-05	2.98515	0.00599731
KIAA1244	-2.53615	0.0413122	-2.7343	0.0245054	-3.28031	0.039821
KIAA1522					-2.91008	0.0206253
KIAA1804			-2.29233	1.4824e-05
KIF11	2.16667	0.00072028	2.41937	0.00115895
KIF12	-5.16291	4.76232e-08	-5.03776	3.13193e-05	-6.98815	0.0337605
KIF13B	-2.18347	0.00053789	-2.26038	0.000204356
KIF14	4.21471	0.04859	4.26625	0.041388
KIF15	3.92555	0.0281881	4.34408	0.016645
KIF18A	3.22769	4.34883e-08	3.48952	4.58124e-06
KIF1A	4.7182	5.92136e-06	5.87333	1.02632e-05
KIF20A	3.89543	0.0469251	4.24858	0.0331161
KIF21A					-2.72837	0.0342672
KIF2C	3.10801	0.00612908	3.39338	0.0029292
KIF3C	2.17395	0.000285571	2.34785	0.000136621
KIF7			2.15439	1.28915e-05
KIFC1	3.58064	0.0309056	3.95503	0.0198723
KL	-6.80786	7.55928e-13	-6.22717	5.82262e-06	-8.3643	0.00182281
KLB			-2.3842	0.0140979
KLC3	-2.50291	0.0259342	-2.63821	0.0164137
KLF5	-2.00862	0.0144206	-2.10086	0.0248878
KLHDC8A	3.75533	0.000721173	3.99264	0.000757904
KLHL3					-2.51198	0.0196006
KLHL32					-2.39493	0.031311
KLHL6	2.2973	0.00150958	2.10049	0.0130582
KLK1	-8.02237	1.50802e-09	-7.79694	1.02687e-05	-8.11278	0.0163404
KLK3	-2.10787	0.0118201	-2.33968	0.00514603
KLK7	-2.11769	0.0395155
KLK8	4.21216	0.0134087	5.37386	0.00592033
KLKB1	-2.70639	0.00169373	-2.7035	0.000607494	-2.37954	0.0251013
KLRC1	2.06204	0.0433378
KLRC4	2.29214	0.000732422	2.10757	0.00443294
KLRK1	2.04374	0.00626093
KMO	-2.93474	5.00819e-08	-3.1622	5.2152e-06
KNG1	-11.5736	1.23917e-10	-11.4537	1.03407e-06	-11.8769	0.000804156
KREMEN2			3.62897	0.022675
KRT17	2.26197	0.0106818			3.24952	0.0260642
KRT19	-2.20666	0.00644132
KRT19P2	-2.27963	0.00535286			-4.21697	0.0432675
KRT7			-2.07216	0.000318281
KRTAP19-8	-3.49327	0.000677056	-3.5465	0.000163468	-3.58282	0.00886824
KRTAP21-2	2.24443	4.96172e-05	2.35617	0.000511574
KRTAP3-3	-2.16143	0.0190058	-2.43923	0.0107798
KRTAP5-3	-2.86645	0.0214737	-2.99583	0.0160317	-2.76822	0.0441508
KRTAP5-8	-4.90397	3.33784e-12	-4.87131	2.13413e-06	-5.1487	0.000481118
KRTCAP3					-2.19137	0.01106
KSR2	-2.27134	0.0266695	-2.26092	0.0188326	-2.53065	0.0449697
L1CAM	-3.44533	2.66197e-05	-3.4185	8.91367e-05	-4.12732	0.011853
LAD1	-3.81598	1.30246e-05	-3.32503	0.000451891	-5.33313	0.0369471
LAIR1	2.27579	0.00473509
LAMA4	2.8198	0.045221	2.85417	0.032328
LAMB4	-2.71502	0.000586352	-2.63263	0.000577889	-3.11513	0.00684217
LAMC3			2.29978	0.021584
LAMP5	3.89766	0.0173843	3.5432	0.0207739
LAPTM5	2.72817	0.0174992	2.46063	0.0288776
LBP			-2.03295	0.0233391
LCK					2.66232	0.0437313
LCN12	-2.0538	0.0404914	-2.13147	0.0270456
LDHD	-5.82022	1.15408e-09	-6.23365	2.13413e-06	-5.03544	0.0370502
LDLRAD2					2.13544	0.00722155
LDLRAD3	2.46678	3.16706e-05	2.41427	0.000156533
LDLRAD4	2.16346	0.0238316
LEF1	2.02249	0.00033594	2.06721	0.000475884
LEFTY1	3.09093	0.00607926	3.74547	0.00262052
LEPREL1	-2.19936	1.1272e-05	-2.27717	0.000934249
LEPREL2	2.29158	4.03123e-09	2.0808	1.34836e-06	2.14347	0.0106944
LGALS1	2.61085	0.00871391	2.21315	0.0206438	3.9491	0.0194551
LGALS2	-2.44294	3.33252e-06	-2.27809	0.000103776
LGR4					-3.27782	0.00969355
LGSN	-4.18756	0.00894741	-4.59811	0.00408777
LHFPL2	3.71938	3.49382e-08	3.21932	3.62276e-06	5.37087	0.00787611
LHFPL3-AS1	-3.41685	0.00591748	-3.61566	0.0039139	-3.5324	0.037115
LHFPL3-AS2	-4.71983	5.17658e-09	-4.53286	0.000338359	-6.07843	0.0324374
LHX1	-3.85906	6.52899e-06	-3.43488	0.000834331
LHX2	2.78175	2.38228e-06	3.03492	0.000176937
LILRB5	2.69991	0.0132346	2.57209	0.0176495
LIMK1					2.23348	0.0298913
LIN28B	2.13361	0.0135158
LIN7A	-2.76547	3.11224e-06	-2.99324	0.000594148
LINC00113	-2.03889	0.0454559	-2.12962	0.0364262
LINC00238			-2.12443	0.00370414
LINC00242			2.1014	0.00480967
LINC00271					-2.92198	0.0379686
LINC00284	-3.92595	0.0282122	-3.78173	0.0302944
LINC00379	-5.57787	0.00459856	-5.39027	0.00208788	-6.40448	0.0186308
LINC00380	-2.0958	0.00804076	-2.66759	0.005314	-2.25194	0.0350012
LINC00417			-2.23119	0.00157326	-2.01685	0.0433965
LINC00472	-3.08506	1.07067e-05	-2.85093	3.57665e-05	-3.98233	0.00618638
LINC00494			-2.16882	0.0277859
LINC00515					-2.62499	0.0371972
LINC00543	-2.33732	0.0244272	-2.76561	0.0148943
LINC00551	-2.70695	0.00239799	-2.74312	0.0012892	-3.16817	0.012198
LINC00570			-2.11311	0.0244142
LINC00605	-3.6833	0.000595767	-3.39095	0.000985505	-4.58612	0.0279395
LINC00645	-5.61523	0.00020704	-5.5961	0.000179829	-6.74593	0.00536767
LINC00659	-3.28911	4.87865e-07	-3.29375	3.57911e-06	-3.50891	0.00131819
LINC00669	2.34687	1.41794e-06	2.58353	0.000482627
LINC00671	-3.47306	3.15742e-05	-3.67008	2.54561e-05	-3.53396	0.0163404
LINC00672	2.19031	0.0176761	2.51651	0.00897757
LINC00683			2.19761	0.0444889
LINC00839	-2.23669	0.00100594	-2.52938	0.00134919	-2.6132	0.0122323
LINC00844			-3.05828	0.0464267
LINC00845	-2.55509	0.000640061	-2.59694	0.000439476
LINC00853	-2.6049	0.0126819	-2.64629	0.0113642	-3.07186	0.0192797
LINC00864	-5.83182	9.64586e-09	-5.98191	1.2555e-06	-5.94999	0.000804156
LINC00900	2.5516	0.0266924	2.46653	0.0193406
LINC00913	2.24802	0.00280075	3.2672	0.000919678
LINC00923	-3.60619	0.000182539	-3.4187	9.24273e-05	-3.99752	0.00393812
LINC00939			-2.27626	1.8026e-05
LINC00948	-3.6901	5.31784e-05	-3.94501	0.000387629	-4.35326	0.00402268
LINC00955	-2.26198	0.00500429	-2.53163	0.00278219	-2.08698	0.0290244
LINC00982	-7.14921	7.01903e-05	-7.15276	2.29909e-05	-7.59105	0.00247423
LINC01006					-2.1277	0.0335046
LINC01020			-2.17957	0.0431027
LINC01057	-2.40214	0.000556278	-2.22927	0.00104811
LINC01060	-2.06627	0.0308292	-2.47234	0.0173019
LINC01105	2.26896	0.00155342	2.54798	0.00547678
LINC01124	-2.49326	0.0143488	-2.73245	0.00776636	-2.98257	0.0249875
LINC01127			-2.1648	0.0449008
LINGO1	2.63967	0.00452228	2.59569	0.00321444
LINGO2			2.29604	0.000944127
LIPC	-2.8126	1.94382e-08	-2.96789	0.000113053
LIPH	-5.353	3.47012e-05	-5.33154	3.70991e-05	-6.20745	0.00254683
LLGL2	-2.9438	8.6687e-11	-2.74934	1.12213e-06	-3.27783	0.00728057
LMNB1	3.11358	0.00479045	3.37633	0.00222006
LMNB2	2.23926	0.00527088	2.37187	0.00284886
LMO1					-3.10782	0.0396632
LMO7	-2.05198	3.59287e-06	-2.2508	7.21948e-05
LMOD1	2.15624	0.0012472
LMTK3	-2.83951	0.0166366	-2.86036	0.0141603	-2.90809	0.04519
LNX1	-4.55153	1.36543e-10	-4.6316	2.13413e-06	-4.94539	0.0026915
LOC100128226	2.66023	4.98768e-06	3.06997	6.7427e-05
LOC100128494	-2.06867	0.00577091	-2.21534	0.00337547
LOC100128593			2.03214	0.0286468
LOC100129148	-3.13067	0.006469	-3.12614	0.0044756	-3.71155	0.0276175
LOC100129397	2.41395	0.00406436	2.07364	0.0116664	3.21972	0.0475057
LOC100129455					-2.04865	0.0267697
LOC100129596	-2.07785	0.0228185	-2.3027	0.0107802
LOC100129721	-3.72939	0.000508667	-3.69881	0.000139461	-4.31697	0.00659449
LOC100129846	-2.05989	0.00011071	-2.0928	0.000580239
LOC100129940					-2.96967	0.0251013
LOC100130111	-3.26861	7.90273e-06	-2.88328	0.000296684
LOC100130232	-6.76062	7.63209e-08	-6.43304	3.40947e-06	-6.09628	0.0380367
LOC100130301	3.78258	0.000210734	3.8193	0.000265942
LOC100130547			-2.05231	0.0441051
LOC100130691	-5.70101	0.000745225	-5.45766	0.00014294	-6.01274	0.00466542
LOC100130899	-5.07663	8.71359e-09	-5.22935	1.06744e-05	-5.51171	0.00709204
LOC100130938	-2.1043	0.00230068	-2.45986	0.000906852
LOC100131000					-2.03189	0.00331179
LOC100131094	-3.77606	9.88889e-06	-3.78345	2.50035e-05
LOC100131662	-4.51163	2.25617e-05	-4.60923	3.05283e-05	-5.27396	0.00402268
LOC100131796	-3.59022	2.13504e-07	-3.59577	3.49176e-06
LOC100132111	-2.25568	0.00033109	-2.5187	0.000538814
LOC100132735	-2.48075	0.000105054	-2.49111	0.00499673	-2.41549	0.0366873
LOC100132891					2.97609	0.0342672
LOC100134317	-2.16113	1.1022e-05	-2.0889	0.00116912
LOC100134368			-2.17866	0.0125602
LOC100134423	-4.17907	0.000174534	-4.30715	4.91722e-05	-4.21283	0.00456194
LOC100287082			-2.061	0.0126969
LOC100287651			-2.31961	6.3367e-07
LOC100288748	-4.10723	0.000490965	-4.18697	0.000248368	-4.85062	0.00488461
LOC100288798			-2.11686	3.14455e-06	-2.18967	0.000933862
LOC100289092			2.22719	0.00594062
LOC100289361					-2.44602	0.025008
LOC100289424			-2.15819	0.043305
LOC100289455	2.06786	0.0104651	2.21448	0.00771251
LOC100422737	-5.07414	3.23132e-09	-5.27769	1.32011e-06	-4.87493	0.0254441
LOC100499221			-2.09806	0.0385338
LOC100499489	2.57448	2.21623e-08	2.8159	9.53074e-06
LOC100505645	-3.19802	0.0108049	-3.48386	0.00564228
LOC100505664	-4.18152	0.00784275	-4.77069	0.00280151
LOC100505676	-2.38054	0.00133008	-2.67351	0.00128248	-2.63737	0.0150177
LOC100505835	-2.14124	0.0482835	-2.45053	0.0299301
LOC100505985	-8.35768	3.90154e-14	-8.56957	3.00907e-07	-8.31206	0.000911103
LOC100506007					-2.36185	0.0199733
LOC100506098	-4.68384	5.30513e-05	-4.68155	0.000338555
LOC100506257	-2.30081	0.0201945	-2.45733	0.0111988
LOC100506421	-3.93166	0.000124359	-4.14488	0.000424083	-5.40545	0.0236732
LOC100506459	-2.15177	1.50237e-05	-2.54145	4.95176e-05
LOC100506498	-4.05408	0.00597989	-4.22434	0.00232068	-3.81227	0.0265911
LOC100506585	3.07545	0.0322211	2.90102	0.0372237
LOC100506664	-5.66964	3.81551e-06	-5.4472	1.00003e-05	-5.84664	0.00285053
LOC100506688					-2.02427	0.0286626
LOC100506718			2.00328	0.0178606
LOC100506731	2.09393	7.16594e-05
LOC100506882	2.2361	0.000563587	2.04522	0.00269611
LOC100507012	-2.79575	0.0202409	-2.9399	0.0169204	-3.70518	0.0461288
LOC100507053	2.23698	0.00613178	2.56214	0.00320652
LOC100507073	2.13933	0.000398147	2.90138	0.000878511
LOC100507165	2.59894	0.0240395
LOC100507267	-7.92272	2.81972e-06	-7.7711	3.73332e-06	-8.20138	0.00305129
LOC100507308					-3.89118	0.0365935
LOC100507351			2.78482	0.0288814
LOC100507403	2.24893	0.040131	2.11264	0.0448986
LOC100507460					2.23071	0.0315125
LOC100507480			-2.03977	0.0003272	-2.21556	0.00279593
LOC100507537	-3.60452	6.32529e-06	-3.77298	1.038e-05	-3.63841	0.00240381
LOC100507651	-4.5569	3.90154e-14	-4.46229	2.51278e-06	-4.882	0.00188811
LOC100509195			2.13695	0.00610105
LOC100509445	2.66481	3.77719e-07	3.02487	2.26541e-05
LOC100509620			-2.16524	0.0325486
LOC100996266	-7.83843	5.90444e-16	-7.94004	7.39085e-07	-7.86889	0.00299459
LOC100996624	2.00801	9.1026e-05
LOC100996628	-2.75549	0.000141753	-2.50755	0.000888789	-3.77432	0.012257
LOC101060091					2.17566	0.0118685
LOC101927252	-2.06089	0.0317562	-2.23509	0.0184878	-2.45101	0.0450324
LOC101927381	2.61842	1.80545e-05	2.96103	0.00180089
LOC101927471			-2.25708	3.3243e-06
LOC101927959			-2.03209	0.000125484
LOC101928004	-2.369	0.00380437	-2.65412	0.00234103
LOC101928058					-2.64762	0.00604832
LOC101928136	-2.03563	0.00531021	-2.51399	0.00478945
LOC101928223	-3.28043	3.94875e-09	-3.43037	0.000147828
LOC101928249			-2.23306	0.0468674
LOC101928331			-2.03304	0.027449
LOC101928652					-2.33882	0.0251574
LOC101928658	-2.33363	0.00644943	-2.02005	0.00924319	-2.6956	0.0252311
LOC101928681	-4.95696	0.0252297	-5.35261	0.0180377
LOC101928987	-2.0206	0.0238064	-2.35375	0.013566
LOC101929152	-2.40954	0.00417334	-2.77745	0.00142731	-2.46167	0.043553
LOC101929221	-2.03605	0.0250226	-2.1013	0.0189721	-2.28161	0.0461288
LOC101929223	-2.9333	0.00831935	-3.16408	0.00437299
LOC101929256	2.09531	0.00039673
LOC101929287	-4.57278	5.74389e-11	-4.84141	6.40174e-07	-4.30116	0.00659675
LOC101929311	3.62446	1.22736e-06	3.91186	3.14041e-05
LOC101929412	-2.85014	0.0311338	-3.02545	0.0232276
LOC101929466	-3.06662	4.56823e-05	-3.33897	8.94384e-05	-3.1109	0.00626667
LOC101929578	-5.14392	0.000117479	-5.34962	7.39682e-05	-4.28331	0.0406132
LOC101929659	-4.22964	4.44376e-07	-4.11709	0.000258708
LOC101930633	-2.32963	2.80283e-07	-2.41889	5.19632e-05
LOC145757	-2.59611	3.65447e-07	-2.73704	1.11236e-05	-2.34881	0.0135263
LOC145837	-2.24535	0.0149917	-2.34398	0.00721976	-2.31586	0.0285721
LOC150381	-2.10544	6.95256e-05	-2.3128	0.000163468
LOC220077					2.24047	0.0456612
LOC254099	-3.26549	0.00687116	-3.20394	0.00378122	-3.33077	0.0236732
LOC283070	2.29083	7.43458e-05	2.22793	3.8152e-05	2.01435	0.0464298
LOC283177	-2.99346	0.00231503	-2.93919	0.00110335	-3.1177	0.0126485
LOC284080					-3.17469	0.0450324
LOC284578	-7.55673	0.00038951	-7.2033	0.000133408	-8.64244	0.00691015
LOC284632			-2.8684	0.0284557
LOC285095			2.26473	0.0206438
LOC285768	-3.92503	0.00550269	-4.39382	0.00250543
LOC388780	2.78934	3.84587e-06	3.10664	4.06738e-05
LOC389332	-7.97889	2.75956e-14	-7.74065	4.76046e-06	-8.94536	0.0155774
LOC401052					-2.23957	0.0292058
LOC440173			2.2045	0.00936085
LOC440910			2.09921	0.00479686
LOC553103	-2.47984	0.00679001	-2.34062	0.00526359	-3.40634	0.0141435
LOC641510	-2.33638	8.37651e-06	-2.2722	0.000309746
LOC643037	-3.49525	0.00645668	-3.67289	0.00345896	-3.5398	0.0370165
LOC643441	-3.42301	0.00305904	-3.72343	0.0012197	-3.47741	0.0156316
LOC644090	-5.01129	0.0200052	-4.92824	0.0113409
LOC644662	-2.97054	0.000209956	-3.21425	9.91255e-05	-3.17689	0.0133782
LOC644838	2.03019	0.00565075	2.38537	0.0075081
LOC645321	-3.24477	0.0265919	-3.52936	0.0136204
LOC645434	-2.16219	0.014565	-2.47165	0.00933954	-2.18919	0.0450324
LOC646976					-2.41119	0.0327845
LOC648149	2.3451	0.0043133	3.10872	0.00209687
LOC727944	-2.58607	0.000272707	-2.83113	0.000169993	-2.46531	0.016698
LOC728040	-4.65871	0.00253369	-4.91417	0.0016805	-4.59405	0.0103093
LOC728290	-5.28335	2.28249e-12	-5.45365	7.39085e-07	-5.40227	0.00356608
LOC728392	3.08815	1.26711e-07	3.47644	2.46582e-06
LOC728586			2.35284	0.00251087
LOC728715	2.92321	0.007625	3.3706	0.00352474
LOC728975	-2.23154	0.00458881	-2.36197	0.00198082	-2.12739	0.0300049
LOC729911			-2.3294	0.0320802
LOC729950	2.04397	0.000569755	2.5822	0.00446578
LOC730159			-2.27056	0.00811263
LOC93444	-2.47566	0.000106419	-2.5253	0.000182463
LOXL2	3.45391	0.000757674	3.05265	0.000930523	4.12998	0.027773
LOXL3	2.25234	0.00108214	2.11493	0.00101325	2.78071	0.0297762
LPAR1	2.17789	0.00127939			2.21602	0.0239226
LPAR4	2.67806	1.91902e-05	2.40773	0.00460186	2.07407	0.0342672
LPAR5	2.2174	0.0335572	2.12419	0.0293008	2.54999	0.0495475
LPIN3	-3.57284	1.57433e-07	-3.60455	0.000313229
LPL	-2.83557	0.0357061	-3.11324	0.0256061
LPPR1	-4.05005	1.30485e-05	-4.37262	5.28493e-05	-5.20708	0.0020106
LPPR3	4.05066	1.8475e-05	4.72686	2.82192e-05
LRFN5	4.31213	0.0022246	4.63884	0.0010931
LRP1B			-2.16161	0.00223944	-2.3999	0.0199685
LRP4	2.24748	3.1777e-05	2.65913	1.32134e-05
LRP8					2.44467	0.0214493
LRRC16A					-2.24552	0.0198897
LRRC17	2.81423	9.20341e-09	2.83404	1.31338e-05	2.79469	0.0325517
LRRC19	-5.87845	3.74845e-11	-5.86422	7.57418e-06	-6.5616	0.00722155
LRRC3-AS1			2.08807	2.60869e-05
LRRC37A6P					-2.22621	0.0433545
LRRC3B	2.43224	0.0138903	2.06451	0.0332977
LRRC43	-3.4373	9.82408e-05	-3.56305	4.22022e-05	-3.88325	0.0026915
LRRC4C	2.80374	4.35957e-06	2.7611	0.000918076
LRRC52			-2.04161	0.000525229
LRRC7			2.46357	0.0077393
LRRC73	-2.29188	8.00035e-05	-2.13966	0.000721371	-3.08402	0.047593
LRRK1					3.25305	0.0309611
LRRK2			-2.10411	0.00527117
LRRN1	3.96408	2.58142e-07	4.50027	3.49176e-06
LRRN3	3.07412	7.47293e-08	3.39137	9.65874e-06
LRRN4	2.64821	0.00389401	3.06865	0.00270703
LRRTM2			2.55915	0.0113656
LRRTM4			2.14723	0.00937528
LRTM2	2.63863	0.0133666	3.16056	0.0167621
LSAMP			2.15102	0.00608504
LSP1					2.93483	0.0396632
LTBP1	2.97069	0.00565781	2.72508	0.00435599	2.71693	0.0293173
LURAP1	-2.02323	0.013873	-2.25897	0.006626
LY6H	4.78809	1.25704e-09	5.29119	6.3119e-06
LY6K	-3.01486	0.00830699	-3.13445	0.0112759
LY86	2.26992	0.010361
LY96	2.10873	0.0379023
LYPD1	4.69756	0.000270623	5.52957	0.000184226
LYPD6B	-2.32584	0.0363037	-2.06659	0.0492476	-3.8505	0.0254798
LZTS3	-2.3711	1.25007e-07	-2.11333	1.42396e-05	-3.46694	0.0229036
MACC1	-4.38924	2.13154e-08	-4.88645	4.55146e-05
MACROD1	-2.14426	1.63623e-06	-2.25481	9.62913e-05
MAD2L1	2.28679	5.50377e-06	2.48895	0.000449284
MAGEL2	3.19613	3.43752e-10	3.36222	3.85845e-06
MAGI2-AS3	-2.17955	0.0148484	-2.21936	0.0134178	-2.81276	0.0457192
MAGI2-IT1	-3.31568	0.00826914	-3.236	0.00595095	-3.78204	0.0268025
MAL	-6.7585	9.96589e-11	-6.47401	2.12048e-05	-8.92976	0.0229297
MAL2	-2.95337	0.000261343
MAN1A1	-2.21046	4.64431e-05	-2.51582	0.00108999
MAN2B1					2.48459	0.0295628
MAOA	-3.92973	0.000914455	-4.02801	0.000338525
MAOB	-3.32036	1.19916e-05	-3.28524	0.00142951
MAP1B	2.29867	0.0493932
MAP3K15	-2.66573	0.0106956	-2.48145	0.0086171	-3.56715	0.0237145
MAP4K4	2.07465	0.000138364	2.18096	6.32492e-05
MAP7	-2.76132	3.4415e-11	-2.61762	3.85489e-06	-2.75624	0.0251013
MAPT	-3.14743	1.41645e-06	-2.36937	0.000208622
MARC2	-2.18866	5.47263e-10	-2.06613	3.07121e-06	-3.0742	0.0466536
MARCH10	-2.90118	0.00940423	-2.78312	0.00603757	-3.51642	0.0165246
MARCH11					-2.45883	0.0379618
MARCH3	2.16391	0.000220025
MARCKS	2.5951	0.00415297	2.37852	0.00311467	2.81071	0.0106944
MARCKSL1	2.97014	1.63835e-08	3.54999	4.72543e-06
MARVELD1	2.90243	0.000837572	2.61134	0.000443354	3.04224	0.00605624
MARVELD3	-3.3203	8.47571e-06	-3.43216	0.000123673	-3.55555	0.00307287
MCCD1	-6.68834	2.55475e-05	-6.71825	4.76046e-06	-7.15423	0.00144932
MCF2L-AS1	-2.34804	0.00172859			-3.6598	0.0426714
MCM10	3.42197	0.00581684	3.65052	0.00277667
MCM2	2.2489	0.00332892	2.73006	0.00129207
MDFI	2.83416	0.044669	2.9598	0.0360455
MDGA2	2.17441	0.0222987	2.22911	0.0203871
MDK	4.17198	4.15097e-08	4.64682	1.34425e-06
ME2					2.2135	0.0212386
MECOM	-3.42543	5.62594e-07	-3.46371	9.44547e-05	-4.76664	0.0397512
MEIS1	2.35141	0.00539926	2.47159	0.00297515
MEIS2			2.37125	6.5511e-05
MELK			3.14772	0.0489882
MEOX1	5.05049	2.40378e-07	5.5036	0.000141965
MEST	2.81384	2.99233e-06	3.44788	4.68265e-06
MEX3A	3.94756	1.09244e-07	4.59188	4.87613e-06
MEX3B	3.95631	8.40891e-06	4.2964	1.08659e-05
MFAP2	4.5181	5.5298e-06	4.9119	5.33668e-06	3.39649	0.0188764
MFAP3L	-3.45912	0.000748644	-3.44666	0.000290461	-3.69734	0.00695358
MFAP4	2.81983	0.00102767	3.39339	0.000438944
MFGE8	2.41241	5.19657e-07	2.3282	2.70424e-05
MFNG					2.48655	0.0419679
MFSD4	-5.77382	0.0162072	-5.59882	0.0100366	-6.8864	0.0245701
MFSD6L	-3.19088	3.59265e-08	-3.00711	0.000172585	-3.11746	0.0308396
MGAM	-2.02214	0.000859701			-2.67632	0.0268416
MIA2	-5.76244	1.21981e-09	-6.06766	8.69084e-06	-5.91974	0.0358585
MIMT1	2.30411	0.00835353	2.72527	0.0100091
MIOX	-7.70664	2.17477e-16	-7.72913	5.3265e-07	-7.62583	0.00704117
MIR181A1HG	2.13627	0.00339641			2.67205	0.0220078
MIR4458HG					-3.26395	0.0308396
MIR4697HG	2.00158	0.00149166	2.90066	0.00031315
MIS18BP1	2.04869	0.00215503	2.01264	0.00105797	2.5554	0.00550303
MISP	-2.35879	1.28916e-05
MKI67	3.33482	0.040057	3.44207	0.0317889
MKLN1-AS	-2.05954	0.001585	-2.09996	0.00174681
MLLT11	3.44021	2.03044e-05	3.59956	6.96491e-05
MLLT4-AS1					-3.07658	0.0305467
MLXIPL	-3.64388	3.7876e-11	-3.26712	4.16325e-06	-3.87684	0.0236993
MMD					2.40742	0.0233705
MME	-6.4146	1.25129e-06	-6.82374	5.32757e-06	-5.96382	0.0314494
MMP11	2.73852	0.00317539	2.55531	0.00378122
MMP16	4.20694	0.00218556	4.40159	0.000839205	3.41572	0.0263077
MMP2	2.67411	0.000713939	2.57395	0.00160513
MMP23B	4.11236	0.000337298	4.60065	0.000128513	2.93758	0.0433545
MMP24	-3.40176	4.48047e-05	-2.89017	0.0124531	-4.89057	0.012257
MMP26	2.31467	0.0017982	2.83115	0.00147355
MMP9	2.88194	0.0175578
MN1	2.06524	0.0139409	2.26086	0.0103545
MND1	3.02128	0.0371273	3.32854	0.0219749
MOGAT1	-4.55431	7.35329e-07	-4.97268	7.95909e-06	-3.78809	0.0172418
MPC1	-2.80957	0.0135588	-2.80416	0.00698267	-2.72875	0.0287566
MPP7	-2.52746	0.00262292	-2.33922	0.0032152	-2.89378	0.0246437
MPPED2	-3.07638	1.27713e-06	-3.22325	4.15893e-05	-4.44464	0.000933862
MRC2	2.69747	4.25607e-10	2.36792	2.8607e-06	3.1378	0.000933862
MRO	-2.39254	1.33258e-06	-2.95444	1.02687e-05
MS4A4A	3.32716	0.0115633	3.05582	0.0154018
MS4A6A	2.42708	0.0400788
MS4A7	2.32894	0.00450536	2.08518	0.0134358
MSANTD3-TMEFF1	3.19189	7.47009e-06	3.71574	2.12048e-05
MSRA	-2.83725	8.70527e-05	-2.85167	1.39897e-05	-2.45007	0.00913586
MST1L	-4.77564	0.00137339	-4.36029	0.000537898	-5.81772	0.0133796
MT1A	-2.02366	0.0445404	-2.31706	0.0287567
MT1B	-2.85587	0.0164097	-3.35421	0.00842112
MT1E	-3.66431	0.00089046	-4.04002	0.000612178
MT1F	-4.12402	0.000595973	-4.09123	0.000248605	-4.0376	0.0141607
MT1G	-8.98041	0.000219112	-9.02411	6.14877e-05	-7.182	0.0268416
MT1H	-8.67115	0.00150584	-8.77668	0.000321311	-7.24106	0.0149007
MT1HL1	-2.99612	0.0123573	-3.41134	0.00641953
MT1L	-2.68934	0.0125434	-3.20761	0.00590815
MT1M	-3.77629	0.00142553	-4.23254	0.000976339
MT1X	-2.56839	0.0201185	-2.96305	0.0125883
MT2A			-2.09782	0.0087963
MTHFD1L					2.03084	0.0193199
MTHFD2					2.88096	0.0338662
MTRNR2L10	-2.66522	2.7351e-11	-2.63081	2.69593e-05	-2.80714	0.0136096
MTRNR2L3	-2.64882	3.7876e-11	-2.64245	6.63983e-06	-2.80748	0.010174
MTRNR2L7	-2.54491	6.46752e-12	-2.52004	9.84248e-06	-2.75226	0.0156768
MTRNR2L9	-2.12152	1.35641e-07	-2.26923	2.23756e-05
MTTP	-3.77617	1.10696e-05	-3.70554	2.74757e-05	-4.07387	0.0059377
MTURN	-2.38354	0.00231543	-2.28931	0.00149124	-3.21567	0.00598874
MTUS1	-2.17821	6.50875e-06	-2.30436	0.000343917
MUC1	-3.65927	1.05267e-06	-3.83182	2.25118e-05	-3.76173	0.0412475
MUC15	-6.06481	0.00327571	-6.14652	0.00123304	-6.54157	0.0220078
MUC20	-3.50365	1.88094e-06	-2.90813	0.000529356	-5.23083	0.00594844
MUC6	-2.6514	0.00524979	-2.65898	0.00218412	-2.37023	0.02781
MURC	4.00149	8.34298e-06	3.94366	1.56393e-05	3.47667	0.0136949
MYB					2.54015	0.0177481
MYBPC2	2.80919	0.00623649	3.43698	0.00245779
MYCN			2.64782	0.0118137
MYH7B					-2.06017	0.0285872
MYH8					-7.21943	0.0395585
MYL3	-4.09954	2.18345e-10	-3.77842	6.683e-05	-5.55548	0.0129303
MYLK2	2.51066	1.16384e-06	2.73735	6.0126e-05
MYO15A			2.41508	0.0229877
MYO3B	-3.30902	4.08663e-05	-3.44718	4.20551e-05	-3.57781	0.00379313
MYO5B	-2.05924	3.29718e-05	-2.20298	0.000297343	-2.49611	0.04519
MYO6					-2.18973	0.0273407
MYO9B					2.90237	0.0389248
MYOM3	-4.25966	5.79948e-10	-4.32772	5.56656e-05	-4.54476	0.0219479
MYOT					-2.43634	0.022614
MYOZ1					-2.44091	0.0152708
MYRFL			-2.12622	0.018576
NAAA	-2.12683	0.00225103	-2.13296	0.00362664
NAP1L2	-3.5022	4.16323e-06	-3.31386	0.00208863
NAPEPLD					-2.04817	0.0248875
NAPSA			-2.13911	0.00206909
NAT8	-10.1614	2.77935e-12	-9.779	1.59637e-06	-10.8514	0.013652
NAT8B	-7.54159	7.27001e-09	-7.4396	1.14406e-06	-7.12162	0.00308602
NAV1					2.35404	0.0325517
NAV3	3.01499	1.71127e-05	2.84388	0.000149958
NCAM1			2.64269	0.049113
NCAPG	3.67686	0.00745127	4.1689	0.00371079
NCCRP1	-2.81405	0.00361259	-2.81832	0.00155796	-2.51216	0.0279395
NCKAP5	-2.07839	0.000825638			-2.8081	0.0238989
ND1	-2.83666	1.08262e-06	-2.8235	1.32244e-05	-2.85598	0.00722155
ND2	-2.77657	4.98874e-05	-2.82109	5.23654e-05	-2.7465	0.00506657
ND3			-2.06573	0.000603838	-2.01532	0.0265042
ND4	-2.44666	4.13124e-05	-2.47965	5.64535e-05	-2.40475	0.00543044
ND4L			-2.14364	4.75785e-05
ND5	-2.50635	1.6579e-06	-2.61918	2.12302e-05	-2.03779	0.0166294
NDC80	2.999	0.0078957	3.0796	0.00476751
NDNF	-2.80755	0.00650417	-2.12869	0.0424308	-5.10022	0.0193199
NDRG1	-2.95247	0.0029686	-3.23428	0.00101428
NEAT1	-2.44711	2.85505e-06	-2.7558	0.000180959
NEBL	-2.32655	3.01437e-08	-2.58219	1.61114e-05	-2.98016	0.0392129
NEBL-AS1	-3.09305	5.97505e-06	-3.07101	8.74902e-05	-4.32354	0.0408524
NECAB2	-2.61701	0.000153523	-2.62025	0.00146429
NEDD4L	-2.45918	1.61868e-06	-2.02948	9.74634e-05	-4.0005	0.0325484
NEK2	2.454	0.044669	2.62445	0.0332018
NELL1	-3.19137	1.7445e-05	-3.24374	8.36693e-05
NELL2	3.57835	0.00202671	3.65359	0.00266881
NEURL3	-4.41836	6.24638e-10	-4.17764	0.000130829	-5.51968	0.00937926
NFAM1	2.16358	0.0181892
NFATC4	3.03487	0.00039673	3.15541	0.000463986
NGFR	2.08386	0.007625	2.43069	0.00406298
NHLRC4					-2.88736	0.0466536
NINJ2	3.06937	0.0449126			4.30608	0.0437313
NINL					-2.24384	0.0461164
NIPAL1	-2.84268	0.00473416	-2.71424	0.00183422	-3.09599	0.018827
NKAIN1	4.13132	2.5379e-06	4.72688	5.50185e-05
NKAIN3	2.68071	0.00408754	3.31279	0.00118582
NKX3-2	2.07058	0.00246318
NLRP3	2.64917	0.038321
NME8	2.40719	0.044352
NMNAT3	-3.69506	5.41291e-05	-3.89595	0.000524844
NMU			4.36423	0.042444
NNAT	4.15161	4.67773e-07	4.94873	6.68322e-05
NOS1	-2.49161	0.00163655	-2.83124	0.00100677	-2.38358	0.0246437
NOSTRIN	-2.83845	8.02201e-10	-2.62614	3.55108e-05
NPHS1	-5.01158	0.00111209	-4.38945	0.00237788	-7.40759	0.0378145
NPHS2	-5.30178	0.000153389	-5.5157	0.000150282
NPNT	-3.64995	7.50698e-07	-3.86124	0.000258949
NPR3	-2.85263	9.42141e-05	-2.45538	0.00114292
NPTX2	5.54798	7.22524e-05	5.89969	0.000194321
NPW	2.4001	0.0318332	2.72599	0.0199863
NPY	3.69417	0.000582098	4.79883	0.000331529
NPY1R	-2.69981	0.000223514	-2.54118	0.00385786
NPY5R	-2.06617	0.000207947
NPY6R	-2.80071	0.0128551	-2.84138	0.00640863	-3.01187	0.0269405
NQO1			-2.17581	0.0109245
NR0B2	-6.16462	3.52502e-12	-5.95212	1.82211e-05	-6.59334	0.000964525
NR1H4	-4.57809	7.83013e-11	-4.67816	4.22978e-05	-4.79065	0.0220654
NR1I3	-4.21612	0.000454677	-4.38482	0.000234196	-4.06979	0.00605624
NR2F1	2.2144	0.000104999	2.59185	9.198e-05
NR2F1-AS1			2.22647	3.09518e-05
NR3C2	-2.28101	0.000602861	-2.0621	0.00301497	-3.89142	0.04351
NR6A1	-2.03871	1.76333e-07
NRCAM	-2.22463	0.000168097			-3.72634	0.00541835
NREP	2.20341	3.11193e-06	2.58625	1.92909e-05
NRG1	-3.02505	4.87663e-06	-3.10928	0.000865731
NRG3			2.34884	0.0444889
NRK	-2.12881	0.00107119
NRXN1	3.07506	2.86291e-05	3.96864	0.000166337
NT5E			-2.02368	0.00319315
NTF4	2.33038	5.62345e-05	2.6219	0.000266127
NTM	2.83418	7.20271e-05	2.77589	0.000466971	3.22821	0.00859312
NTN4	-3.83474	0.000855089	-3.72828	0.001142	-5.30914	0.0337794
NTNG1	-3.53484	0.0167017	-3.5614	0.0107158	-3.80316	0.0351335
NUAK2	-2.89222	0.0460259
NUDT1					2.31939	0.0138105
NUDT11	3.14873	1.94067e-06	3.58819	0.000556742
NUF2	3.18693	0.0085364	3.35429	0.00513075
NUP62CL	-2.80191	0.0138277	-2.83787	0.00947235	-3.47693	0.0283183
NUPR1L	-2.70958	0.000246446	-2.40777	0.000318982	-3.54106	0.0124259
NXF2	2.2001	0.00280229	3.3769	0.00110335
NXF5			2.13105	0.00191764
NXNL2					-2.17552	0.018609
NXPH4	2.17369	0.00612908
OBP2A	2.03189	0.00183909
OCLN	-2.18678	9.3246e-06			-3.37722	0.00356641
ODAM	-3.06381	0.00881465	-3.40141	0.0032289	-3.00136	0.0470871
ODF3L1	2.02635	0.0272028	2.23014	0.0165321
ODF3L2	-3.2303	0.00195367	-3.46374	0.000807148	-3.12266	0.0251883
OGDHL	-6.71008	3.7876e-11	-5.65782	3.32266e-06	-9.69309	0.0412711
OGFRL1					2.28318	0.0158435
OIP5	3.1474	0.00454842	3.45904	0.00256862
OLFM3	2.08687	0.000664288
OLFM4			-5.68894	0.0457099
OLFML1	2.30016	0.00534909	2.3135	0.00529124
OLFML2B	3.31184	0.000654675	2.63964	0.00201	4.50874	0.00312877
OLFML3			2.2314	0.0091387
OLIG1	-6.83211	2.31387e-08	-6.38104	2.60869e-05	-7.08907	0.00373747
OR2T10	-3.51847	0.000583103	-3.77918	0.000265012	-3.50671	0.0096806
OR2T5			-2.74852	0.038815
OR4X1			-2.3881	0.00146598
OR51E1	3.0026	0.00237421	3.69782	0.000865364
OR51E2	2.99688	8.78105e-05	3.45356	0.000248195
OR5L2	-3.49399	0.000208986	-3.45309	0.000112595	-3.64423	0.00477458
OR8I2			-2.84317	0.0364766
ORC1	2.22628	4.67584e-06	2.19955	0.000937912
ORC6	2.74163	0.000116404	3.04509	0.000157204
OSBPL3	-2.2256	0.000120408	-2.55494	0.00204271
OSR1	3.46634	2.58196e-05	3.94099	0.000103031
OTUD6A	-2.7762	1.78859e-06	-2.81709	1.28915e-05	-2.71467	0.0129539
OVOL1	-4.46288	0.00497738	-4.2259	0.00532605	-6.07154	0.0166294
OVOL2	-3.90584	2.47073e-05	-3.37121	0.000500431	-5.23512	0.00179324
OXER1	-2.07663	0.000904508
OXT	-2.14675	0.000641819	-2.27944	0.000208032
P2RX5					2.35297	0.0337624
PACSIN3					-2.27916	0.0457192
PADI2	-2.53466	0.00651678	-2.59712	0.00705396
PAG1					2.47109	0.00604832
PAGE4	2.70854	0.0289322	3.06756	0.048645
PAH	-4.39746	1.44842e-10	-4.57904	6.3161e-07	-4.34142	0.00393812
PAK6	-3.5494	6.32501e-05	-3.12619	0.00080238	-4.79295	0.00233986
PALM3	-4.46389	3.3873e-13	-4.47765	3.59643e-06	-5.40665	0.00526859
PANK1	-2.24168	2.90374e-05
PAQR4	2.81768	0.00370582	2.90982	0.00149722	3.03339	0.0163404
PAQR5	-5.96218	5.03689e-10	-5.96221	2.9226e-05
PAQR7					-2.15087	0.0183671
PARD6B	-2.76147	2.11972e-05	-2.29212	0.000399651	-4.54104	0.0468855
PARK2	-2.36488	0.00397245	-2.43042	0.0027358
PARPBP	2.34376	0.0247346	2.33307	0.0188722
PATE2	3.48217	5.28693e-07	4.15946	4.65235e-05
PATL2					2.21699	0.0143997
PBLD	-3.33805	2.84685e-08	-3.20163	9.62848e-07	-3.44947	0.00573733
PCCA	-2.04556	0.00139255			-2.59801	0.013862
PCDH1	-2.49209	9.03319e-10	-2.5608	1.80502e-05
PCDH18	2.96428	0.00314256	3.31568	0.00112089
PCDH20			-2.64732	0.0367064
PCDHA11			2.14644	0.0125883
PCDHB10	2.61383	8.33215e-07	3.13787	1.41779e-05
PCDHB16			2.01533	0.00129982
PCDHB18			2.56218	0.00137668
PCDHB2	3.10232	8.96235e-05	3.35983	0.000552397
PCDHB6	2.87328	2.16837e-07	3.60002	2.25726e-05
PCDHB9	2.32041	3.42114e-06	2.72527	6.30082e-05
PCDP1	-3.91399	2.92141e-09	-3.96897	0.000100261	-4.37637	0.025068
PCK1	-9.99643	9.84015e-15	-9.79005	8.28413e-07	-11.869	0.0096806
PCK2	-2.70046	1.28603e-07	-2.8579	1.822e-06	-2.20454	0.00357095
PCOLCE2	-4.1688	1.93332e-05	-4.81815	0.000724841
PCP2	-2.73235	0.00808277	-2.75198	0.00349167	-2.56427	0.0248875
PCP4					-4.21169	0.0217637
PDCD4-AS1	2.30307	0.00452984	2.49325	0.001378	2.19106	0.0266481
PDE1B					2.01691	0.0365126
PDE1C	-2.87152	0.035378	-3.05242	0.0261151	-3.67584	0.0349659
PDE5A	2.10611	1.04946e-06	2.20129	7.53588e-05
PDE7B					-2.27207	0.0337624
PDE8B	-2.43353	1.65094e-05	-2.29857	5.82901e-05	-3.30233	0.0014669
PDLIM3	3.72788	0.00362772	3.71824	0.00436163	4.47693	0.0207416
PDLIM4					2.31507	0.0180784
PDLIM7	2.23043	0.00161131	2.09314	0.00103037	2.34049	0.0124651
PDZD3	-6.91533	2.54172e-14	-6.66082	2.64947e-06	-7.34558	0.00527311
PDZK1	-6.27392	2.99552e-11	-5.89235	7.98575e-06	-7.67992	0.0304881
PDZK1IP1	-7.12823	3.41594e-10	-7.22139	6.36889e-05	-8.125	0.0427866
PEBP1					-2.10026	0.0319975
PEBP4	-2.04342	0.0163068	-2.1134	0.00908882
PEG10	2.02917	0.0351851	3.02434	0.00516741
PERP	-2.38331	0.00529219	-2.46121	0.00947235	-3.15549	0.0499823
PGPEP1	-2.01167	0.00424076	-2.15489	0.00159321
PHF19	2.06146	0.00261057			2.29107	0.0300049
PHYH	-2.02429	0.00712826	-2.13559	0.00216171
PHYHIP	-2.21515	0.0228872	-2.48064	0.0127928
PHYHIPL	-3.87438	0.00015599	-3.70088	0.000340824	-4.39394	0.00520103
PI16	-3.81829	0.00986661	-4.23829	0.00405686	-4.0372	0.0415499
PIANP	5.37256	1.83244e-05	5.61808	5.22294e-05
PIGR	-6.6164	2.23818e-06	-7.01749	0.000165279
PIK3C2G	-4.31374	1.15423e-07	-4.31893	0.000206061	-5.16711	0.0268416
PIP5K1B	-2.09089	0.00354359	-2.20745	0.0035275
PIPOX	-2.60977	1.4038e-05	-2.5784	2.41452e-06	-2.85908	0.0026915
PKDREJ	-2.0297	0.0123128	-2.1742	0.0078272	-2.32419	0.039821
PKHD1	-4.55457	2.84088e-13	-4.72301	1.2555e-06	-4.56891	0.0207416
PKLR	-3.39283	2.0943e-05	-3.27407	1.5533e-05	-3.6053	0.028971
PKMYT1			2.10552	0.00142951
PKNOX2			2.04728	0.0175514
PKP3	-2.07001	0.0218219
PKP4					-2.4335	0.031311
PLA1A	-2.64255	2.11442e-08	-2.82377	0.000152991
PLA2G12B	-3.81458	0.022685	-4.01088	0.0191473	-4.18718	0.0446213
PLA2G4F	-2.23807	0.000627791	-2.19356	0.000638443	-2.63961	0.0321275
PLA2G7	4.84324	0.0319058	4.56949	0.0330876
PLA2R1	-2.92728	0.0368924	-2.92745	0.0287799
PLAC1	2.52378	0.0002668	3.23881	0.00384372
PLCE1					-2.79776	0.0449697
PLCG2	-2.43653	0.00233544	-2.69001	0.000912278
PLCL1	-3.76343	0.000440623	-3.71181	0.000259036	-3.95519	0.0321275
PLCXD3	-2.86745	0.00018369	-2.53197	0.00812014
PLEK2	-2.71201	0.00625832	-2.98234	0.00641674
PLEKHG7	-2.58901	0.00158512	-2.82758	0.000873816	-2.7571	0.0160272
PLEKHH2	-2.19228	9.59304e-05	-2.13844	0.00245537	-2.90575	0.0466322
PLEKHO1	2.27907	0.00286591	2.28268	0.00116183	2.58001	0.0131003
PLG	-10.8451	1.72116e-16	-11.0404	6.3367e-07	-10.6004	0.00326543
PLIN4	-3.49299	1.94042e-05	-3.73056	3.83136e-05
PLIN5	-4.3935	9.01715e-12	-4.21263	7.91134e-06
PLK4			3.24255	0.0471141
PLLP	-3.21631	0.0101845	-2.96316	0.00727485	-4.15299	0.0189805
PLS1	-2.85063	0.00020349	-2.48745	0.00165316
PLSCR2	-2.44564	3.36965e-06	-2.80235	2.78058e-05	-2.21526	0.00425743
PLXDC1	2.15886	0.000559993	2.12153	0.00101428
PM20D1	-3.18793	0.0001488	-3.58763	0.000142397	-2.85969	0.0448672
PMFBP1					3.74354	0.0339675
PNP	-2.31781	5.24623e-05	-2.52812	0.000266127
PNPLA1	-3.76218	3.33978e-07	-4.15403	2.30127e-06	-3.38049	0.0153436
PNPLA3	-2.71177	3.06538e-09	-2.47545	0.000214075	-2.6019	0.0379686
PODXL	-3.32125	0.00302999	-3.26937	0.00184085
POLE2	2.47162	0.00153957	2.77396	0.000627945
POLQ	3.00149	0.0248069	3.3441	0.0146306
POTED			2.3436	0.0264967
POU3F3	-2.63811	0.000192844	-2.84231	0.000264033	-3.63527	0.0300215
POU3F4			-2.00572	0.00480192
PP7080	-2.3178	0.0443401			-3.1145	0.0425913
PPAPDC1A	-2.69354	4.30405e-05	-2.81305	0.00026372
PPARA	-2.10469	3.78799e-11	-2.17663	1.02468e-06
PPARGC1A	-2.6695	4.33152e-05	-2.57655	0.000124949	-3.67613	0.0110238
PPBP			-2.08083	0.00709727
PPFIA2	-2.92138	0.000187271	-3.4564	8.35471e-05
PPL	-2.09245	0.0347519			-4.25677	0.0310324
PPP1R1A	-2.35733	6.43808e-09	-2.42337	1.18992e-05	-2.70343	0.0221269
PPP2R3A					-2.95366	0.0239226
PPP5D1	2.16115	0.00171904	2.344	0.00107792
PRAME	2.93377	0.000413459	3.1588	0.000423008
PRC1	2.47134	0.0297172	2.69094	0.0197816
PRDM16			-2.10088	8.28413e-07
PRKAA2	-2.83783	5.99938e-06	-2.18154	0.000339976	-5.71418	0.0358585
PRKCB	3.59042	0.00148181	3.60594	0.000928955	4.86676	0.00547239
PRL			2.25036	0.0139214
PRLR	-3.56493	5.24375e-08	-3.68335	7.98575e-06	-3.52395	0.0351335
PROC	-3.85002	3.21524e-11	-3.9321	7.95909e-06
PRODH	-4.24991	0.00621264	-4.33701	0.00220295	-4.48652	0.0251574
PRODH2	-8.43553	9.40872e-11	-8.27615	1.11478e-06	-9.84357	0.000804156
PROM2	-4.75904	2.80789e-05	-4.57578	3.20949e-05	-5.36624	0.0026915
PROZ	-4.3776	0.00152298	-4.4626	0.000604844	-4.17763	0.0149711
PRR15L	-5.31667	3.54114e-08	-4.82427	0.000232929	-7.64852	0.0468855
PRR5-ARHGAP8	-2.96722	1.83591e-07	-2.65042	4.6813e-05	-3.75113	0.000933862
PRRG2	-2.62759	0.000953621	-2.6041	0.000460124	-2.686	0.0254798
PRRG4	-3.02763	9.99903e-07	-3.23638	0.000116183
PRRT4	2.16753	0.0184005	2.22777	0.0168435
PRRX1	3.61085	0.0484048
PRSS22	-2.90626	6.22059e-07	-2.65418	0.000123673	-3.4083	0.00131819
PRSS45	-2.36193	0.0334871	-2.23323	0.040333	-3.51788	0.0370165
PRSS55			-2.04305	0.00141871
PRSS56	2.59259	3.24364e-05	2.87339	4.95572e-05	2.3545	0.00787783
PRSS8	-4.14063	4.59986e-06	-3.00009	0.000401745
PSD2	3.24293	5.22301e-07	3.96136	1.11142e-05
PSRC1	2.25396	0.0247043	2.38077	0.0149231
PTGER1	-5.28285	0.00130511	-5.24147	0.000675082	-5.61027	0.0398839
PTGER3	-5.88589	1.2561e-08	-5.4934	7.91486e-05	-5.96833	0.00420653
PTGFR	-3.81917	3.92246e-06	-4.36252	4.63841e-05
PTGFRN	2.5836	0.00135292	2.51322	0.000619075	2.06035	0.0215148
PTGIS	3.23621	0.0189319	2.9536	0.0259897
PTH1R	-5.23034	2.42713e-05	-4.63462	0.000109539	-7.39303	0.0207174
PTK7			2.1479	4.76046e-06
PTPN3	-2.19264	1.90904e-05
PTPRO	-3.88598	0.000725045	-4.00378	0.00072891
PTPRQ	-4.54418	0.00509953	-4.71196	0.00251087	-5.08608	0.0192815
PTTG1	3.14153	0.0202409	3.31588	0.0117624
PTTG2	2.70375	0.0179199	2.83299	0.0103068
PTTG3P	3.14133	0.00237673	3.28333	0.00114489
PURG	2.43296	5.87098e-06	2.8282	5.73143e-06
PVALB	-5.86283	0.000238513	-5.91905	6.98977e-05	-5.9455	0.00659449
PVRL4	-2.94074	3.95879e-06	-3.28058	7.4098e-05
PWAR4	-2.07753	0.00501094	-2.2869	0.00348865	-2.18981	0.0299363
PXDN	3.53578	0.0031976	3.60328	0.000740602	3.14707	0.0135935
PYCARD					3.39134	0.0236732
PYCR1	2.69334	0.00235673	2.29256	0.00505674	2.94759	0.0175834
PYDC1					2.43816	0.0239804
QRFPR	-3.84357	0.000272707	-4.01497	0.000141936
RAB11FIP3					-2.19068	0.0323413
RAB11FIP4	-2.12835	6.07634e-07			-3.13227	0.0340284
RAB11FIP5	-2.52314	2.01431e-07	-2.54121	0.000112641	-2.58692	0.0461962
RAB17	-5.30302	2.46949e-11	-5.28906	3.59643e-06	-6.03602	0.00878827
RAB19	-2.15477	0.00567811	-2.34655	0.00358565
RAB25	-4.98645	1.19397e-06	-4.52763	0.000439318	-7.0292	0.00853681
RAB31					2.85488	0.0212386
RAB33A	3.48412	0.0139784	3.75713	0.0093643	3.30787	0.037839
RAB3IP	-2.0571	2.65167e-07			-2.81417	0.00149153
RAB42	3.48913	1.1272e-05	3.17203	0.000421599
RAB7B	3.49319	0.00849158	3.07601	0.0136857
RAB9B	2.10661	8.77237e-05	2.11833	7.21948e-05
RAC2					2.66002	0.0203334
RAD51	2.6272	0.00310597	2.83194	0.001697
RAD51AP1	3.73853	0.0036146	3.75268	0.00142951	3.59715	0.0158533
RADIL	3.13724	2.89402e-05	3.56729	0.000104139
RAET1E			-3.80153	0.0466327
RALGPS1					-3.10295	0.00240381
RALYL	-3.65621	1.30167e-06	-3.63417	0.000416529
RAMP3	-2.78572	7.97801e-05	-3.1223	0.00032146
RANBP3L	-5.14413	0.00111134	-4.88303	0.0018165	-6.76082	0.0233136
RAP1GAP	-2.59694	0.0140896	-2.63863	0.00946084	-2.46554	0.0478245
RAPGEF3	-2.64444	1.51616e-05	-2.61348	3.50912e-06	-2.83042	0.0044059
RASA3					2.31379	0.0265042
RASAL1	-2.8106	0.00853889	-2.56327	0.011311
RASD1	-4.49523	0.00070912	-4.42964	0.000691168	-3.66192	0.0375676
RASEF	-2.61876	4.38288e-07	-2.78879	3.14041e-05	-3.69761	0.0180724
RASGRP1	-2.20695	0.000119837	-2.21981	0.00256766
RASL12	2.57956	0.0338151	3.02678	0.0230355
RASSF3					3.09146	0.0344393
RASSF7	-2.05469	0.00227748
RBKS	-2.1434	1.92297e-05	-2.10101	4.06181e-05	-2.42586	0.0211283
RBM24	3.63956	5.07758e-07	4.5271	5.09732e-06
RBM47	-3.14589	2.05323e-08	-3.37052	3.25352e-05
RBP1	3.52553	0.00171544	3.86623	0.000812342
RBP2			-3.9991	0.0370749
RBP4	-4.52842	2.19006e-05	-4.49969	0.000979472
RBP5	-5.05461	1.57879e-06	-4.768	2.37218e-06	-5.68895	0.0075061
RCAN2	-2.24374	0.000640137	-2.30777	0.00122716
RCOR2	2.53639	0.000911668	3.13546	0.000430143
RCSD1	2.035	0.0469261			3.57661	0.0406132
RDH12	-4.98629	3.395e-08	-5.04946	5.23018e-06	-4.5501	0.0368559
REEP2	2.52299	0.00798748	3.14416	0.00283269
REEP4					2.06232	0.0427866
REEP6	-2.44412	0.00118857	-2.59831	0.00032146	-2.03738	0.016717
RELT					2.48827	0.0446709
REN	-4.65945	0.00134072	-4.1567	0.0021562	-6.21878	0.00679765
RERGL	-2.96914	0.000142192	-2.50047	0.00945587
RGL3	-2.47971	1.6896e-08	-2.1166	0.000110339	-3.49067	0.0206657
RGMA	3.06905	0.0175023	3.5647	0.0101103
RGN	-3.99314	2.60624e-08	-3.7225	3.14041e-05	-5.69645	0.0178222
RGS10					2.77701	0.00488461
RGS17	3.23496	2.86278e-07	3.50538	4.44607e-05
RGS19					2.99123	0.0302365
RGS22	3.20503	1.08805e-06	3.28437	7.22679e-06	2.41128	0.0231463
RGS4	2.33744	0.012374			3.07868	0.0268416
RGS7					-3.26802	0.0366872
RGS9BP	-2.16655	0.0110293	-2.29037	0.00724095	-2.22964	0.0304881
RHBG	-6.52979	7.82732e-14	-6.23576	2.32077e-06	-7.15779	0.00331179
RHCG	-8.20633	0.000543562	-8.09763	6.23733e-05	-8.63371	0.00509695
RHEBL1					2.0815	0.02835
RHPN2	-2.20345	0.000455314			-3.36883	0.0419119
RILP	-2.1528	0.000239816	-2.32231	0.000787834
RIMBP3	2.28845	0.00355345	2.23068	0.00202611	2.83406	0.0125442
RNF125					2.39281	0.0475464
RNF148	-2.42428	0.00539737	-2.41783	0.00506983
RNF152	-2.94585	1.27132e-06	-2.82631	8.0108e-06
RNF165	2.25305	0.0169371	2.42458	0.0131656
RNF166					2.24082	0.043698
RNF175	3.86801	0.0488697	3.90655	0.0435831
RNF183	-2.32138	0.0077917	-2.40014	0.00506061	-2.34633	0.0449993
RNF186	-6.67157	0.000516096	-7.01859	0.000182463	-6.98881	0.00690791
RNF43	-2.51018	0.00170914
ROBO2			2.50121	0.038642
ROR1	2.16832	1.50802e-06	2.03566	0.000135536
RORC	-4.68667	4.06278e-10	-4.53934	4.41304e-05	-3.82869	0.00722155
RPH3AL					-2.22545	0.00986071
RPL27A	2.42417	0.000118157	2.78888	6.683e-05
RPRM	2.24346	0.0323411	2.55567	0.0216356
RPS6KA6	-2.14551	1.28603e-07
RRAD	-3.12937	5.57537e-06	-2.97251	0.00160305
RRAGD	-2.12674	0.00244235
RRM2			2.11726	0.000379738
RSPO1	2.96312	9.59774e-05	4.27116	0.000101735
RSPO4	2.53081	0.000729277	3.05388	0.000684844
RTDR1	-2.25861	0.000547492
RTKN					-3.04568	0.0236993
RTKN2	2.70059	0.00527822	2.91221	0.00244973
RTN4R	2.03181	0.000296319	2.26638	0.000299888
RTN4RL1					-2.183	0.016717
RTP3	-2.28115	0.0465951	-2.7427	0.0351012
RUNDC3B	-2.66724	9.35828e-07	-2.65635	0.000826442
RUNX3	2.18901	0.00762381
S100A14	-3.93712	1.77031e-05	-3.77279	0.000934249	-5.56888	0.00913586
S100A2	-5.29682	0.00061473	-5.06668	0.000195148	-5.39936	0.0102087
S100A3			-2.17414	0.0324098
S100A6			-2.2028	0.000402118
S1PR5					2.56218	0.0323665
SACS	2.36682	0.00164964	2.27544	0.000438249	2.45604	0.0107692
SAMD12	-2.38723	9.046e-08	-2.23022	1.97824e-05	-3.23359	0.0390165
SAMD5	-2.05772	2.559e-06
SBK1			2.59517	0.00144226
SCARB1					3.12554	0.0366872
SCARNA14	2.34719	0.000100334	2.87614	0.000149958
SCG5	5.12988	0.00362772	5.49833	0.00114794	4.09805	0.0347225
SCGB1D1	-5.08713	0.00548631	-5.23273	0.00260845
SCGB1D2	-4.96199	0.00504719	-5.13905	0.00213445	-5.12791	0.0446564
SCGB2A1	-2.89425	0.00127058	-2.84442	0.0053187
SCIN	-5.35858	1.33693e-09	-5.48845	6.23731e-05
SCML2			2.16211	0.00429391
SCN2A	-3.06939	0.0124271	-2.73623	0.0149414	-4.06931	0.022614
SCN4B	2.38388	0.00732157	2.46712	0.00473299
SCNN1A	-6.1055	6.65461e-11	-5.79692	4.75516e-05	-7.81918	0.0172814
SCNN1B	-6.14392	1.3711e-07	-6.25692	4.76046e-06	-6.84097	0.000933862
SCNN1G	-7.11226	3.50945e-06	-7.2772	3.49176e-06	-7.66361	0.00126731
SCTR	-2.07725	0.000523031	-2.39524	0.00494376
SDC1			-2.08177	0.0166937
SDC4	-2.47756	0.00011092	-2.21485	0.000338359	-2.79884	0.0240667
SDCBP2-AS1	-2.0627	0.000514851	-2.10294	0.000383988	-2.43205	0.00586835
SEBOX	2.71859	0.01538	2.93717	0.00787549
SEMA3A	3.81157	0.000828641	3.94452	0.000571652	3.31054	0.0335473
SEMA3G					-2.20968	0.0304881
SEMA6D	-2.53583	0.000601293	-2.26811	0.00156249	-4.22995	0.00364724
SERINC2	-2.57513	0.00336883	-2.30846	0.00323531	-2.89237	0.0177601
SERPINA5	-7.33389	1.70115e-06	-6.70038	1.92233e-05	-8.44833	0.00116809
SERPINA6	-4.59072	2.27758e-13	-4.70174	7.5989e-07	-3.89835	0.00527311
SERPINC1	-2.65912	0.0459333	-2.98335	0.0284392
SERPINE1	2.25974	0.0128622	2.16794	0.0189857
SERPINF2	-2.88941	4.43771e-06	-3.04586	4.29779e-05
SERPINH1					2.31113	0.0361713
SERPINI2			-2.43736	0.0335152
SFRP2	5.07298	0.0286453	4.10946	0.046901
SFXN2					-2.3315	0.0137515
SGIP1	-2.40626	0.00118766	-2.45117	0.00440244
SGK2	-4.78984	1.89842e-11	-4.40714	8.29924e-07	-6.10369	0.0236878
SGMS2	-2.32916	0.000127894	-3.06508	0.000226244
SGOL1	2.22964	0.0173707	2.32664	0.0106245
SGPP2	-2.35167	8.55814e-07
SGSM1	-2.37448	0.00056702	-2.81427	0.000514174	-2.49626	0.0102087
SH2D3A	-3.81456	1.17341e-08	-3.82369	0.000226672	-3.34762	0.0390484
SH3BP1					2.19813	0.00882362
SH3GL2	-4.02528	3.08014e-07	-3.65927	2.97276e-05	-5.29567	0.0175834
SH3PXD2A					2.19911	0.0106734
SH3RF3-AS1			2.19111	0.00118331
SH3YL1					-2.36656	0.00512841
SHANK1					2.40094	0.0477143
SHANK2	-2.4965	0.00312142	-2.66444	0.00132562	-2.46129	0.02303
SHC4			2.21984	0.049094
SHD			2.00074	0.00276008	2.57348	0.0102087
SHF	2.03277	0.00322005	2.38038	0.00255133
SHMT1	-2.45912	0.00118213	-2.31937	0.00079078	-2.52673	0.0185622
SIAE	-2.45133	0.000937346	-2.67023	0.000408631
SIGLEC1	4.00888	0.0161483	3.65228	0.0212154
SIGLEC15					2.71641	0.0439181
SIGLEC7	2.74702	0.0169364	2.53994	0.0244822
SIM1	-3.87656	1.65038e-09	-3.97148	8.04821e-05
SIX1	6.26719	0.000283245	6.45964	0.000161425
SIX2	5.75359	0.0137407	6.6619	0.00745043
SIX4			2.41689	0.00167379
SKA1	2.98966	0.0110695	2.99152	0.00704346
SKA3	3.24979	0.0336427	3.31984	0.0264037
SLC10A2	-2.31461	2.64979e-05	-2.09722	0.0229088	-2.4154	0.0177481
SLC10A4	2.09675	7.68508e-07	2.17935	0.000907455
SLC12A1	-9.98158	8.71925e-07	-9.91842	2.37218e-06	-10.6773	0.000953443
SLC12A3	-7.41389	6.67594e-05	-7.6981	1.41348e-05	-6.67386	0.0163404
SLC13A1	-5.88717	0.000226935	-5.85557	4.5952e-05	-5.96413	0.00392323
SLC13A3	-4.48417	0.00549214	-4.36593	0.00188877	-4.86105	0.0157046
SLC14A1			-2.62252	0.04062
SLC15A1			2.28784	0.00885016
SLC15A2	-3.83451	2.68739e-09	-3.97812	1.27742e-05
SLC15A3	2.10679	0.00319507
SLC16A1	2.02995	0.000305453	2.13552	0.000194321
SLC16A12	-5.17872	0.000423242	-5.44649	7.78702e-05	-4.95609	0.0134765
SLC16A4	-3.40017	1.91796e-08	-3.48561	3.09518e-05	-4.0775	0.0363942
SLC16A5	-2.66759	6.03148e-07	-2.60767	1.09516e-05
SLC16A7	-4.01124	1.35651e-05	-4.33894	2.96198e-05
SLC16A9	-3.43634	3.80623e-06	-3.12597	6.74871e-05	-5.24802	0.0253958
[truncated: 569 more rows]

## Sheet: Blatt1 Table S3
Table S3. Correlation analysis of miRNA and mRNA profile in WT.
miRNA	accession no.	gene name	Pearson correlation coefficient	Gene Fold change (WT vs Normal)	Gene p-value (ttest; WT vs Normal)	miRNA Fold change (WT vs Normal)	miRNA p-value (ttest; WT vs Normal)	mirwalk.predicted	mirwalk.tools	mirtarbase.validated	mirtarbase.experiments	starbase.stringencyGe2	starbase.tools
hsa-miR-30a	MIMAT0000087	GLIPR1	-0.513178	4.17554	0.00104905	-16.9463	7.4e-12	TRUE	miRanda	TRUE	Proteomics	FALSE	-
hsa-miR-194	MIMAT0000460	GLIPR1	-0.715939	4.17554	0.00104905	-46.2178	9.52e-10	TRUE	miRanda	FALSE	-	FALSE	-
hsa-miR-204	MIMAT0000265	GLIPR1	-0.626138	4.17554	0.00104905	-36.81	0.00154679	TRUE	miRanda,miRWalk,Targetscan	FALSE	-	FALSE	-
hsa-miR-192	MIMAT0000222	GLIPR1	-0.725913	4.17554	0.00104905	-28.5527	0.00455468	TRUE	miRanda,miRWalk	FALSE	-	FALSE	-
hsa-miR-429	MIMAT0001536	GLIPR1	-0.533085	4.17554	0.00104905	-28.4646	9.52e-10	TRUE	miRanda	FALSE	-	FALSE	-
hsa-miR-30a*	MIMAT0000088	GLIPR1	-0.563838	4.17554	0.00104905	-18.8146	0.00022834	TRUE	miRanda,miRWalk	FALSE	-	FALSE	-
hsa-miR-514	MIMAT0002883	GLIPR1	-0.618549	4.17554	0.00104905	-9.56105	0.0315166	TRUE	miRanda,miRWalk	FALSE	-	FALSE	-
hsa-miR-30c-2*	MIMAT0004550	GLIPR1	-0.673495	4.17554	0.00104905	-7.05949	0.000128821	TRUE	miRanda,miRWalk	FALSE	-	FALSE	-
hsa-miR-30c	MIMAT0000244	GLIPR1	-0.61078	4.17554	0.00104905	-7.00515	8.66e-09	TRUE	miRanda	FALSE	-	FALSE	-
hsa-miR-30e*	MIMAT0000693	GLIPR1	-0.580683	4.17554	0.00104905	-6.40949	2.86e-08	TRUE	miRanda,miRWalk	FALSE	-	FALSE	-
hsa-miR-30b	MIMAT0000420	GLIPR1	-0.5456	4.17554	0.00104905	-5.18561	2.83e-06	TRUE	miRanda	FALSE	-	FALSE	-
hsa-miR-30d	MIMAT0000245	GLIPR1	-0.527788	4.17554	0.00104905	-4.08877	0.0040731	TRUE	miRanda	FALSE	-	FALSE	-
hsa-miR-30e	MIMAT0000692	GLIPR1	-0.545566	4.17554	0.00104905	-3.67906	0.000527046	TRUE	miRanda	FALSE	-	FALSE	-
hsa-miR-1973	MIMAT0009448	GLIPR1	-0.550743	4.17554	0.00104905	-22.3522	0.00154679	FALSE	-	FALSE	-	FALSE	-
hsa-miR-4284	MIMAT0016915	GLIPR1	-0.563108	4.17554	0.00104905	-5.84348	0.00234241	FALSE	-	FALSE	-	FALSE	-
hsa-miR-184	MIMAT0000454	GLIPR1	-0.573475	4.17554	0.00104905	-3.77856	0.0471754	FALSE	-	FALSE	-	FALSE	-
hsa-miR-509-5p	MIMAT0004779	GLIPR1	-0.561291	4.17554	0.00104905	-2.87305	0.0406154	FALSE	-	FALSE	-	FALSE	-
hsa-miR-192*	MIMAT0004543	GLIPR1	-0.638474	4.17554	0.00104905	-2.59251	0.0496439	FALSE	-	FALSE	-	FALSE	-
hsa-miR-4254	MIMAT0016884	GLIPR1	-0.533467	4.17554	0.00104905	-2.23216	0.044083	FALSE	-	FALSE	-	FALSE	-
hsa-miR-514	MIMAT0002883	IGF2	-0.543075	4.17962	5.16e-08	-9.56105	0.0315166	FALSE	-	FALSE	-	FALSE	-
hsa-miR-29c	MIMAT0000681	IGF2	-0.650986	4.17962	5.16e-08	-6.41599	7.63e-10	FALSE	-	FALSE	-	FALSE	-
hsa-miR-29b	MIMAT0000100	IGF2	-0.76926	4.17962	5.16e-08	-6.05381	1.53e-09	FALSE	-	FALSE	-	FALSE	-
hsa-miR-4313	MIMAT0016865	IGF2	-0.554232	4.17962	5.16e-08	-3.83928	0.0433536	FALSE	-	FALSE	-	FALSE	-
hsa-miR-29a	MIMAT0000086	IGF2	-0.750149	4.17962	5.16e-08	-3.59987	1.48e-05	FALSE	-	FALSE	-	FALSE	-
hsa-miR-650	MIMAT0003320	IGF2	-0.510425	4.17962	5.16e-08	-2.82359	0.000641415	FALSE	-	FALSE	-	FALSE	-
hsa-miR-145	MIMAT0000437	IGF2	-0.503895	4.17962	5.16e-08	-2.30911	0.000190459	FALSE	-	FALSE	-	FALSE	-
hsa-miR-3619	MIMAT0017999	IGF2	-0.504626	4.17962	5.16e-08	-2.22165	7.57e-06	FALSE	-	FALSE	-	FALSE	-
hsa-miR-22	MIMAT0000077	IGF2	-0.678368	4.17962	5.16e-08	-2.15966	0.0040731	FALSE	-	FALSE	-	FALSE	-
hsa-miR-3148	MIMAT0015021	LHX1	-0.565441	-3.85906	6.53e-06	2.16406	8.93e-05	FALSE	-	FALSE	-	FALSE	-
hsa-miR-1281	MIMAT0005939	LHX1	-0.534927	-3.85906	6.53e-06	2.16453	0.00789577	FALSE	-	FALSE	-	FALSE	-
hsa-miR-3149	MIMAT0015022	LHX1	-0.53958	-3.85906	6.53e-06	2.31002	0.00144797	FALSE	-	FALSE	-	FALSE	-
hsa-miR-382	MIMAT0000737	LHX1	-0.523774	-3.85906	6.53e-06	2.51265	0.000951205	FALSE	-	FALSE	-	FALSE	-
hsa-miR-1225-5p	MIMAT0005572	LHX1	-0.505844	-3.85906	6.53e-06	3.50426	9.16e-06	FALSE	-	FALSE	-	FALSE	-
hsa-miR-34a	MIMAT0000255	LHX1	-0.526157	-3.85906	6.53e-06	5.47031	0.0483291	FALSE	-	FALSE	-	FALSE	-
hsa-miR-194	MIMAT0000460	MEIS1	-0.580367	2.35141	0.00539926	-46.2178	9.52e-10	TRUE	miRanda	FALSE	-	FALSE	-
hsa-miR-29b	MIMAT0000100	MEIS1	-0.531864	2.35141	0.00539926	-6.05381	1.53e-09	TRUE	miRanda	FALSE	-	FALSE	-
hsa-miR-650	MIMAT0003320	MEIS1	-0.567813	2.35141	0.00539926	-2.82359	0.000641415	TRUE	miRanda,miRWalk	FALSE	-	FALSE	-
hsa-miR-192*	MIMAT0004543	MEIS1	-0.535088	2.35141	0.00539926	-2.59251	0.0496439	TRUE	miRanda	FALSE	-	FALSE	-
hsa-miR-192	MIMAT0000222	MEIS1	-0.561775	2.35141	0.00539926	-28.5527	0.00455468	FALSE	-	FALSE	-	FALSE	-
hsa-miR-429	MIMAT0001536	MEIS1	-0.523898	2.35141	0.00539926	-28.4646	9.52e-10	FALSE	-	FALSE	-	FALSE	-
hsa-miR-1973	MIMAT0009448	MEIS1	-0.526894	2.35141	0.00539926	-22.3522	0.00154679	FALSE	-	FALSE	-	FALSE	-
hsa-miR-514	MIMAT0002883	MEIS1	-0.580867	2.35141	0.00539926	-9.56105	0.0315166	FALSE	-	FALSE	-	FALSE	-
hsa-miR-30c-2*	MIMAT0004550	MEIS1	-0.546097	2.35141	0.00539926	-7.05949	0.000128821	FALSE	-	FALSE	-	FALSE	-
hsa-miR-4313	MIMAT0016865	MEIS1	-0.581499	2.35141	0.00539926	-3.83928	0.0433536	FALSE	-	FALSE	-	FALSE	-
hsa-miR-514	MIMAT0002883	SIX2	-0.591405	5.75359	0.0137407	-9.56105	0.0315166	FALSE	-	FALSE	-	FALSE	-
hsa-miR-29c	MIMAT0000681	SIX2	-0.566343	5.75359	0.0137407	-6.41599	7.63e-10	FALSE	-	FALSE	-	FALSE	-
hsa-miR-29b	MIMAT0000100	SIX2	-0.664157	5.75359	0.0137407	-6.05381	1.53e-09	FALSE	-	FALSE	-	FALSE	-
hsa-miR-4313	MIMAT0016865	SIX2	-0.584448	5.75359	0.0137407	-3.83928	0.0433536	FALSE	-	FALSE	-	FALSE	-
hsa-miR-29a	MIMAT0000086	SIX2	-0.622713	5.75359	0.0137407	-3.59987	1.48e-05	FALSE	-	FALSE	-	FALSE	-
hsa-miR-650	MIMAT0003320	SIX2	-0.600749	5.75359	0.0137407	-2.82359	0.000641415	FALSE	-	FALSE	-	FALSE	-
hsa-miR-3619	MIMAT0017999	SIX2	-0.595768	5.75359	0.0137407	-2.22165	7.57e-06	FALSE	-	FALSE	-	FALSE	-
hsa-miR-22*	MIMAT0004495	SIX2	-0.535228	5.75359	0.0137407	-2.18871	3.33e-06	FALSE	-	FALSE	-	FALSE	-
hsa-miR-22	MIMAT0000077	SIX2	-0.63889	5.75359	0.0137407	-2.15966	0.0040731	FALSE	-	FALSE	-	FALSE	-
hsa-miR-194	MIMAT0000460	SOX11	-0.555141	7.73845	1.52e-05	-46.2178	9.52e-10	TRUE	miRanda,miRDB,miRWalk,RNA22,Targetscan	FALSE	-	FALSE	-
hsa-miR-204	MIMAT0000265	SOX11	-0.624911	7.73845	1.52e-05	-36.81	0.00154679	TRUE	miRanda,miRDB,miRWalk,RNA22,Targetscan	FALSE	-	FALSE	-
hsa-miR-30a*	MIMAT0000088	SOX11	-0.570149	7.73845	1.52e-05	-18.8146	0.00022834	TRUE	miRanda	FALSE	-	FALSE	-
hsa-miR-30a	MIMAT0000087	SOX11	-0.527484	7.73845	1.52e-05	-16.9463	7.4e-12	TRUE	miRanda,miRWalk,Targetscan	FALSE	-	FALSE	-
hsa-miR-514	MIMAT0002883	SOX11	-0.682977	7.73845	1.52e-05	-9.56105	0.0315166	TRUE	miRanda,miRWalk	FALSE	-	FALSE	-
hsa-miR-29c	MIMAT0000681	SOX11	-0.677772	7.73845	1.52e-05	-6.41599	7.63e-10	TRUE	miRanda	FALSE	-	FALSE	-
hsa-miR-29b	MIMAT0000100	SOX11	-0.715907	7.73845	1.52e-05	-6.05381	1.53e-09	TRUE	miRanda	FALSE	-	FALSE	-
hsa-miR-502-3p	MIMAT0004775	SOX11	-0.513349	7.73845	1.52e-05	-3.83844	0.0195059	TRUE	miRanda,Targetscan	FALSE	-	FALSE	-
hsa-miR-29a	MIMAT0000086	SOX11	-0.73848	7.73845	1.52e-05	-3.59987	1.48e-05	TRUE	miRanda	FALSE	-	FALSE	-
hsa-miR-650	MIMAT0003320	SOX11	-0.643923	7.73845	1.52e-05	-2.82359	0.000641415	TRUE	miRanda,miRWalk,Targetscan	FALSE	-	FALSE	-
hsa-miR-192*	MIMAT0004543	SOX11	-0.645045	7.73845	1.52e-05	-2.59251	0.0496439	TRUE	miRanda,miRWalk	FALSE	-	FALSE	-
hsa-miR-145	MIMAT0000437	SOX11	-0.526306	7.73845	1.52e-05	-2.30911	0.000190459	TRUE	miRanda,miRDB,miRWalk,RNA22,Targetscan	FALSE	-	TRUE
hsa-miR-22	MIMAT0000077	SOX11	-0.661517	7.73845	1.52e-05	-2.15966	0.0040731	TRUE	miRanda	FALSE	-	FALSE	-
hsa-miR-193b	MIMAT0002819	SOX11	-0.518064	7.73845	1.52e-05	-2.11453	7.87e-05	TRUE	miRanda	FALSE	-	FALSE	-
hsa-miR-192	MIMAT0000222	SOX11	-0.561132	7.73845	1.52e-05	-28.5527	0.00455468	FALSE	-	FALSE	-	FALSE	-
hsa-miR-4313	MIMAT0016865	SOX11	-0.604842	7.73845	1.52e-05	-3.83928	0.0433536	FALSE	-	FALSE	-	FALSE	-
hsa-miR-3619	MIMAT0017999	SOX11	-0.597224	7.73845	1.52e-05	-2.22165	7.57e-06	FALSE	-	FALSE	-	FALSE	-
hsa-miR-145	MIMAT0000437	MEST	-0.535422	2.81384	2.99e-06	-2.30911	0.000190459	TRUE	miRanda,miRDB,miRWalk,Targetscan	TRUE	Reporter assay;Microarray	FALSE	-
hsa-miR-192	MIMAT0000222	DTL	-0.586198	3.89593	0.0410602	-28.5527	0.00455468	TRUE	miRanda,Targetscan	TRUE	Luciferase reporter assay//qRT-PCR//Reporter assay;Microarray;Other	FALSE	-
hsa-miR-192	MIMAT0000222	LMNB2	-0.540047	2.23926	0.00527088	-28.5527	0.00455468	TRUE	miRanda,miRWalk	TRUE	Luciferase reporter assay//qRT-PCR//Western blot//Reporter assay;Western blot;Microarray;Other	FALSE	-
hsa-miR-204	MIMAT0000265	MEIS1	-0.525171	2.35141	0.00539926	-36.81	0.00154679	TRUE	miRanda,Targetscan	TRUE	Luciferase reporter assay//Microarray//Western blot//Reporter assay;Western blot;Other	FALSE	-
hsa-miR-29a	MIMAT0000086	CD276	-0.503747	2.04817	2.09e-06	-3.59987	1.48e-05	TRUE	miRanda,miRWalk,Targetscan	TRUE	Luciferase reporter assay//Western blot	TRUE	TargetScan,PicTar,miRanda
hsa-miR-29a	MIMAT0000086	PXDN	-0.631124	3.53578	0.0031976	-3.59987	1.48e-05	TRUE	miRanda,miRDB,miRWalk,Targetscan	TRUE	Luciferase reporter assay//Western blot	FALSE	-
hsa-miR-29b	MIMAT0000100	TET1	-0.75627	2.45068	0.00273701	-6.05381	1.53e-09	TRUE	miRanda,miRDB,miRWalk,Targetscan	TRUE	qRT-PCR//Luciferase reporter assay//Western blot	TRUE	TargetScan,PicTar,miRanda
hsa-miR-30a	MIMAT0000087	DTL	-0.511418	3.89593	0.0410602	-16.9463	7.4e-12	FALSE	-	TRUE	Flow//Luciferase reporter assay//qRT-PCR//Western blot	FALSE	-
hsa-miR-30c	MIMAT0000244	SERPINE1	-0.524704	2.25974	0.0128622	-7.00515	8.66e-09	TRUE	miRanda,miRWalk,Targetscan	TRUE	Luciferase reporter assay	FALSE	-
hsa-miR-30d	MIMAT0000245	EZH2	-0.549658	2.65751	0.00120367	-4.08877	0.0040731	FALSE	-	TRUE	Luciferase reporter assay//qRT-PCR//Western blot	FALSE	-
hsa-miR-22	MIMAT0000077	BUB1B	-0.658085	3.45916	0.022414	-2.15966	0.0040731	FALSE	-	TRUE	CLASH	FALSE	-
hsa-miR-192	MIMAT0000222	BUB1B	-0.575946	3.45916	0.022414	-28.5527	0.00455468	FALSE	-	TRUE	Microarray	FALSE	-
hsa-miR-193b	MIMAT0002819	CDC20	-0.562551	2.27594	0.000275505	-2.11453	7.87e-05	FALSE	-	TRUE	Microarray	FALSE	-
hsa-miR-193b	MIMAT0002819	CDK1	-0.524333	2.02707	0.000886456	-2.11453	7.87e-05	FALSE	-	TRUE	Microarray	FALSE	-
hsa-miR-193b	MIMAT0002819	ORC6	-0.516449	2.74163	0.000116404	-2.11453	7.87e-05	FALSE	-	TRUE	Microarray	FALSE	-
hsa-miR-192	MIMAT0000222	TTK	-0.506676	4.02772	0.00666275	-28.5527	0.00455468	FALSE	-	TRUE	Microarray	FALSE	-
hsa-miR-193b	MIMAT0002819	BUB1B	-0.569285	3.45916	0.022414	-2.11453	7.87e-05	FALSE	-	TRUE	Microarray,CLASH	FALSE	-
hsa-miR-29c	MIMAT0000681	APC2	-0.51342	2.39167	0.00347337	-6.41599	7.63e-10	TRUE	miRanda	FALSE	-	FALSE	-
hsa-miR-29b	MIMAT0000100	APC2	-0.527154	2.39167	0.00347337	-6.05381	1.53e-09	TRUE	miRanda	FALSE	-	FALSE	-
hsa-miR-29a	MIMAT0000086	APC2	-0.54103	2.39167	0.00347337	-3.59987	1.48e-05	TRUE	miRanda	FALSE	-	FALSE	-
hsa-miR-30a	MIMAT0000087	BUB1	-0.56647	3.74146	0.0379505	-16.9463	7.4e-12	TRUE	miRanda	FALSE	-	FALSE	-
hsa-miR-30c	MIMAT0000244	BUB1	-0.509016	3.74146	0.0379505	-7.00515	8.66e-09	TRUE	miRanda	FALSE	-	FALSE	-
hsa-miR-30d	MIMAT0000245	BUB1	-0.530516	3.74146	0.0379505	-4.08877	0.0040731	TRUE	miRanda	FALSE	-	FALSE	-
hsa-miR-200a	MIMAT0000682	BUB1	-0.500191	3.74146	0.0379505	-46.4655	2.79e-13	FALSE	-	FALSE	-	FALSE	-
hsa-miR-194	MIMAT0000460	BUB1	-0.566088	3.74146	0.0379505	-46.2178	9.52e-10	FALSE	-	FALSE	-	FALSE	-
hsa-miR-204	MIMAT0000265	BUB1	-0.650385	3.74146	0.0379505	-36.81	0.00154679	FALSE	-	FALSE	-	FALSE	-
hsa-miR-192	MIMAT0000222	BUB1	-0.577475	3.74146	0.0379505	-28.5527	0.00455468	FALSE	-	FALSE	-	FALSE	-
hsa-miR-30a*	MIMAT0000088	BUB1	-0.661936	3.74146	0.0379505	-18.8146	0.00022834	FALSE	-	FALSE	-	FALSE	-
hsa-miR-514	MIMAT0002883	BUB1	-0.557602	3.74146	0.0379505	-9.56105	0.0315166	FALSE	-	FALSE	-	FALSE	-
hsa-miR-30c-2*	MIMAT0004550	BUB1	-0.546403	3.74146	0.0379505	-7.05949	0.000128821	FALSE	-	FALSE	-	FALSE	-
hsa-miR-29c	MIMAT0000681	BUB1	-0.736807	3.74146	0.0379505	-6.41599	7.63e-10	FALSE	-	FALSE	-	FALSE	-
hsa-miR-29b	MIMAT0000100	BUB1	-0.665222	3.74146	0.0379505	-6.05381	1.53e-09	FALSE	-	FALSE	-	FALSE	-
hsa-miR-532-3p	MIMAT0004780	BUB1	-0.59129	3.74146	0.0379505	-5.3682	0.00494485	FALSE	-	FALSE	-	FALSE	-
hsa-miR-532-5p	MIMAT0002888	BUB1	-0.578004	3.74146	0.0379505	-4.15879	0.000754552	FALSE	-	FALSE	-	FALSE	-
hsa-miR-502-3p	MIMAT0004775	BUB1	-0.757201	3.74146	0.0379505	-3.83844	0.0195059	FALSE	-	FALSE	-	FALSE	-
hsa-miR-362-3p	MIMAT0004683	BUB1	-0.584335	3.74146	0.0379505	-3.80364	0.00120223	FALSE	-	FALSE	-	FALSE	-
hsa-miR-362-5p	MIMAT0000705	BUB1	-0.608642	3.74146	0.0379505	-3.72617	0.0195059	FALSE	-	FALSE	-	FALSE	-
hsa-miR-29a	MIMAT0000086	BUB1	-0.72775	3.74146	0.0379505	-3.59987	1.48e-05	FALSE	-	FALSE	-	FALSE	-
hsa-miR-660	MIMAT0003338	BUB1	-0.526128	3.74146	0.0379505	-3.1577	0.00404992	FALSE	-	FALSE	-	FALSE	-
hsa-miR-650	MIMAT0003320	BUB1	-0.544666	3.74146	0.0379505	-2.82359	0.000641415	FALSE	-	FALSE	-	FALSE	-
hsa-miR-500a*	MIMAT0002871	BUB1	-0.635198	3.74146	0.0379505	-2.69328	0.0492036	FALSE	-	FALSE	-	FALSE	-
hsa-miR-192*	MIMAT0004543	BUB1	-0.659219	3.74146	0.0379505	-2.59251	0.0496439	FALSE	-	FALSE	-	FALSE	-
hsa-miR-29c*	MIMAT0004673	BUB1	-0.625906	3.74146	0.0379505	-2.48117	0.0315166	FALSE	-	FALSE	-	FALSE	-
hsa-miR-455-5p	MIMAT0003150	BUB1	-0.639219	3.74146	0.0379505	-2.36193	0.012181	FALSE	-	FALSE	-	FALSE	-
hsa-miR-145	MIMAT0000437	BUB1	-0.520964	3.74146	0.0379505	-2.30911	0.000190459	FALSE	-	FALSE	-	FALSE	-
hsa-miR-22	MIMAT0000077	BUB1	-0.609031	3.74146	0.0379505	-2.15966	0.0040731	FALSE	-	FALSE	-	FALSE	-
hsa-miR-193b	MIMAT0002819	BUB1	-0.574816	3.74146	0.0379505	-2.11453	7.87e-05	FALSE	-	FALSE	-	FALSE	-
hsa-miR-194	MIMAT0000460	BUB1B	-0.539261	3.45916	0.022414	-46.2178	9.52e-10	TRUE	miRanda,Targetscan	FALSE	-	FALSE	-
hsa-miR-30a*	MIMAT0000088	BUB1B	-0.596789	3.45916	0.022414	-18.8146	0.00022834	TRUE	miRanda,miRWalk	FALSE	-	FALSE	-
hsa-miR-22*	MIMAT0004495	BUB1B	-0.540806	3.45916	0.022414	-2.18871	3.33e-06	TRUE	miRanda,miRWalk	FALSE	-	FALSE	-
hsa-miR-204	MIMAT0000265	BUB1B	-0.597412	3.45916	0.022414	-36.81	0.00154679	FALSE	-	FALSE	-	FALSE	-
hsa-miR-514	MIMAT0002883	BUB1B	-0.570234	3.45916	0.022414	-9.56105	0.0315166	FALSE	-	FALSE	-	FALSE	-
hsa-miR-30c-2*	MIMAT0004550	BUB1B	-0.537338	3.45916	0.022414	-7.05949	0.000128821	FALSE	-	FALSE	-	FALSE	-
hsa-miR-29c	MIMAT0000681	BUB1B	-0.773346	3.45916	0.022414	-6.41599	7.63e-10	FALSE	-	FALSE	-	FALSE	-
hsa-miR-29b	MIMAT0000100	BUB1B	-0.746583	3.45916	0.022414	-6.05381	1.53e-09	FALSE	-	FALSE	-	FALSE	-
hsa-miR-30d	MIMAT0000245	BUB1B	-0.507453	3.45916	0.022414	-4.08877	0.0040731	FALSE	-	FALSE	-	FALSE	-
hsa-miR-502-3p	MIMAT0004775	BUB1B	-0.630607	3.45916	0.022414	-3.83844	0.0195059	FALSE	-	FALSE	-	FALSE	-
hsa-miR-184	MIMAT0000454	BUB1B	-0.50413	3.45916	0.022414	-3.77856	0.0471754	FALSE	-	FALSE	-	FALSE	-
hsa-miR-362-5p	MIMAT0000705	BUB1B	-0.525682	3.45916	0.022414	-3.72617	0.0195059	FALSE	-	FALSE	-	FALSE	-
hsa-miR-29a	MIMAT0000086	BUB1B	-0.78355	3.45916	0.022414	-3.59987	1.48e-05	FALSE	-	FALSE	-	FALSE	-
hsa-miR-200b*	MIMAT0004571	BUB1B	-0.509265	3.45916	0.022414	-3.1324	0.0190592	FALSE	-	FALSE	-	FALSE	-
hsa-miR-650	MIMAT0003320	BUB1B	-0.521892	3.45916	0.022414	-2.82359	0.000641415	FALSE	-	FALSE	-	FALSE	-
hsa-miR-500a*	MIMAT0002871	BUB1B	-0.51569	3.45916	0.022414	-2.69328	0.0492036	FALSE	-	FALSE	-	FALSE	-
hsa-miR-192*	MIMAT0004543	BUB1B	-0.659469	3.45916	0.022414	-2.59251	0.0496439	FALSE	-	FALSE	-	FALSE	-
hsa-miR-29c*	MIMAT0004673	BUB1B	-0.628868	3.45916	0.022414	-2.48117	0.0315166	FALSE	-	FALSE	-	FALSE	-
hsa-miR-455-5p	MIMAT0003150	BUB1B	-0.528732	3.45916	0.022414	-2.36193	0.012181	FALSE	-	FALSE	-	FALSE	-
hsa-miR-200a	MIMAT0000682	CCND2	-0.540293	4.39773	1.63e-06	-46.4655	2.79e-13	TRUE	miRanda,miRDB,miRWalk,RNA22,Targetscan	FALSE	-	FALSE	-
hsa-miR-194	MIMAT0000460	CCND2	-0.61979	4.39773	1.63e-06	-46.2178	9.52e-10	TRUE	miRanda,miRWalk,Targetscan	FALSE	-	FALSE	-
hsa-miR-204	MIMAT0000265	CCND2	-0.653927	4.39773	1.63e-06	-36.81	0.00154679	TRUE	miRanda,miRDB,miRWalk,Targetscan	FALSE	-	TRUE	TargetScan,PITA,miRanda
hsa-miR-200b	MIMAT0000318	CCND2	-0.539793	4.39773	1.63e-06	-35.3775	3.1e-06	TRUE	miRanda	FALSE	-	FALSE	-
hsa-miR-192	MIMAT0000222	CCND2	-0.640297	4.39773	1.63e-06	-28.5527	0.00455468	TRUE	miRanda,miRDB,miRWalk,Targetscan	FALSE	-	FALSE	-
hsa-miR-429	MIMAT0001536	CCND2	-0.530751	4.39773	1.63e-06	-28.4646	9.52e-10	TRUE	miRanda,RNA22	FALSE	-	FALSE	-
hsa-miR-30a*	MIMAT0000088	CCND2	-0.562952	4.39773	1.63e-06	-18.8146	0.00022834	TRUE	miRanda,miRWalk	FALSE	-	FALSE	-
hsa-miR-514	MIMAT0002883	CCND2	-0.739949	4.39773	1.63e-06	-9.56105	0.0315166	TRUE	Targetscan	FALSE	-	FALSE	-
hsa-miR-30c-2*	MIMAT0004550	CCND2	-0.59711	4.39773	1.63e-06	-7.05949	0.000128821	TRUE	miRanda,miRWalk	FALSE	-	FALSE	-
hsa-miR-29c	MIMAT0000681	CCND2	-0.714637	4.39773	1.63e-06	-6.41599	7.63e-10	TRUE	miRanda,miRWalk,Targetscan	FALSE	-	TRUE	TargetScan,PicTar,PITA,miRanda
hsa-miR-29b	MIMAT0000100	CCND2	-0.675758	4.39773	1.63e-06	-6.05381	1.53e-09	TRUE	miRanda,miRWalk,Targetscan	FALSE	-	TRUE	TargetScan,PicTar,PITA,miRanda
hsa-miR-30d	MIMAT0000245	CCND2	-0.534857	4.39773	1.63e-06	-4.08877	0.0040731	TRUE	miRanda,Targetscan	FALSE	-	FALSE	-
hsa-miR-30e	MIMAT0000692	CCND2	-0.573748	4.39773	1.63e-06	-3.67906	0.000527046	TRUE	miRanda,Targetscan	FALSE	-	FALSE	-
hsa-miR-29a	MIMAT0000086	CCND2	-0.677678	4.39773	1.63e-06	-3.59987	1.48e-05	TRUE	miRanda,miRWalk,Targetscan	FALSE	-	TRUE	TargetScan,PicTar,PITA,miRanda
hsa-miR-192*	MIMAT0004543	CCND2	-0.684738	4.39773	1.63e-06	-2.59251	0.0496439	TRUE	miRanda,miRWalk	FALSE	-	FALSE	-
hsa-miR-22*	MIMAT0004495	CCND2	-0.50894	4.39773	1.63e-06	-2.18871	3.33e-06	TRUE	miRanda	FALSE	-	FALSE	-
hsa-miR-22	MIMAT0000077	CCND2	-0.51262	4.39773	1.63e-06	-2.15966	0.0040731	TRUE	Targetscan	FALSE	-	FALSE	-
hsa-miR-1973	MIMAT0009448	CCND2	-0.515661	4.39773	1.63e-06	-22.3522	0.00154679	FALSE	-	FALSE	-	FALSE	-
hsa-miR-4313	MIMAT0016865	CCND2	-0.522997	4.39773	1.63e-06	-3.83928	0.0433536	FALSE	-	FALSE	-	FALSE	-
hsa-miR-184	MIMAT0000454	CCND2	-0.598198	4.39773	1.63e-06	-3.77856	0.0471754	FALSE	-	FALSE	-	FALSE	-
hsa-miR-200b*	MIMAT0004571	CCND2	-0.527971	4.39773	1.63e-06	-3.1324	0.0190592	FALSE	-	FALSE	-	FALSE	-
hsa-miR-650	MIMAT0003320	CCND2	-0.648362	4.39773	1.63e-06	-2.82359	0.000641415	FALSE	-	FALSE	-	FALSE	-
hsa-miR-29c*	MIMAT0004673	CCND2	-0.609634	4.39773	1.63e-06	-2.48117	0.0315166	FALSE	-	FALSE	-	FALSE	-
hsa-miR-3619	MIMAT0017999	CCND2	-0.515232	4.39773	1.63e-06	-2.22165	7.57e-06	FALSE	-	FALSE	-	FALSE	-
hsa-miR-194	MIMAT0000460	CCNE2	-0.545991	2.02687	0.0497774	-46.2178	9.52e-10	TRUE	miRanda	FALSE	-	FALSE	-
hsa-miR-514	MIMAT0002883	CCNE2	-0.530831	2.02687	0.0497774	-9.56105	0.0315166	TRUE	miRanda,miRDB,miRWalk,Targetscan	FALSE	-	FALSE	-
hsa-miR-30d	MIMAT0000245	CCNE2	-0.518852	2.02687	0.0497774	-4.08877	0.0040731	TRUE	miRanda,miRDB,miRWalk,Targetscan	FALSE	-	TRUE	TargetScan,PicTar,PITA,miRanda
hsa-miR-29c	MIMAT0000681	CCNE2	-0.677523	2.02687	0.0497774	-6.41599	7.63e-10	FALSE	-	FALSE	-	FALSE	-
hsa-miR-138	MIMAT0000430	CCNE2	-0.549094	2.02687	0.0497774	-6.09319	0.0393204	FALSE	-	FALSE	-	FALSE	-
hsa-miR-29b	MIMAT0000100	CCNE2	-0.647152	2.02687	0.0497774	-6.05381	1.53e-09	FALSE	-	FALSE	-	FALSE	-
hsa-miR-502-3p	MIMAT0004775	CCNE2	-0.602343	2.02687	0.0497774	-3.83844	0.0195059	FALSE	-	FALSE	-	FALSE	-
hsa-miR-29a	MIMAT0000086	CCNE2	-0.642499	2.02687	0.0497774	-3.59987	1.48e-05	FALSE	-	FALSE	-	FALSE	-
hsa-miR-650	MIMAT0003320	CCNE2	-0.509597	2.02687	0.0497774	-2.82359	0.000641415	FALSE	-	FALSE	-	FALSE	-
hsa-miR-500a*	MIMAT0002871	CCNE2	-0.576241	2.02687	0.0497774	-2.69328	0.0492036	FALSE	-	FALSE	-	FALSE	-
hsa-miR-665	MIMAT0004952	CCNE2	-0.544586	2.02687	0.0497774	-2.17957	0.0468347	FALSE	-	FALSE	-	FALSE	-
hsa-miR-22	MIMAT0000077	CCNE2	-0.600736	2.02687	0.0497774	-2.15966	0.0040731	FALSE	-	FALSE	-	FALSE	-
hsa-miR-193b	MIMAT0002819	CCNE2	-0.519114	2.02687	0.0497774	-2.11453	7.87e-05	FALSE	-	FALSE	-	FALSE	-
hsa-miR-204	MIMAT0000265	CDC20	-0.514824	2.27594	0.000275505	-36.81	0.00154679	FALSE	-	FALSE	-	FALSE	-
hsa-miR-514	MIMAT0002883	CDC20	-0.520733	2.27594	0.000275505	-9.56105	0.0315166	FALSE	-	FALSE	-	FALSE	-
hsa-miR-29c	MIMAT0000681	CDC20	-0.704734	2.27594	0.000275505	-6.41599	7.63e-10	FALSE	-	FALSE	-	FALSE	-
hsa-miR-29b	MIMAT0000100	CDC20	-0.689825	2.27594	0.000275505	-6.05381	1.53e-09	FALSE	-	FALSE	-	FALSE	-
hsa-miR-532-3p	MIMAT0004780	CDC20	-0.500385	2.27594	0.000275505	-5.3682	0.00494485	FALSE	-	FALSE	-	FALSE	-
hsa-miR-502-3p	MIMAT0004775	CDC20	-0.626178	2.27594	0.000275505	-3.83844	0.0195059	FALSE	-	FALSE	-	FALSE	-
hsa-miR-29a	MIMAT0000086	CDC20	-0.720423	2.27594	0.000275505	-3.59987	1.48e-05	FALSE	-	FALSE	-	FALSE	-
hsa-miR-650	MIMAT0003320	CDC20	-0.507463	2.27594	0.000275505	-2.82359	0.000641415	FALSE	-	FALSE	-	FALSE	-
hsa-miR-500a*	MIMAT0002871	CDC20	-0.538478	2.27594	0.000275505	-2.69328	0.0492036	FALSE	-	FALSE	-	FALSE	-
hsa-miR-192*	MIMAT0004543	CDC20	-0.516046	2.27594	0.000275505	-2.59251	0.0496439	FALSE	-	FALSE	-	FALSE	-
hsa-miR-29c*	MIMAT0004673	CDC20	-0.541549	2.27594	0.000275505	-2.48117	0.0315166	FALSE	-	FALSE	-	FALSE	-
hsa-miR-145	MIMAT0000437	CDC20	-0.52267	2.27594	0.000275505	-2.30911	0.000190459	FALSE	-	FALSE	-	FALSE	-
hsa-miR-22*	MIMAT0004495	CDC20	-0.537759	2.27594	0.000275505	-2.18871	3.33e-06	FALSE	-	FALSE	-	FALSE	-
hsa-miR-22	MIMAT0000077	CDC20	-0.730232	2.27594	0.000275505	-2.15966	0.0040731	FALSE	-	FALSE	-	FALSE	-
hsa-miR-145	MIMAT0000437	CDC25C	-0.505413	2.97289	0.0281381	-2.30911	0.000190459	TRUE	miRanda	FALSE	-	FALSE	-
hsa-miR-29c	MIMAT0000681	CDC25C	-0.662343	2.97289	0.0281381	-6.41599	7.63e-10	FALSE	-	FALSE	-	FALSE	-
hsa-miR-29b	MIMAT0000100	CDC25C	-0.639074	2.97289	0.0281381	-6.05381	1.53e-09	FALSE	-	FALSE	-	FALSE	-
hsa-miR-532-3p	MIMAT0004780	CDC25C	-0.550591	2.97289	0.0281381	-5.3682	0.00494485	FALSE	-	FALSE	-	FALSE	-
hsa-miR-502-3p	MIMAT0004775	CDC25C	-0.669588	2.97289	0.0281381	-3.83844	0.0195059	FALSE	-	FALSE	-	FALSE	-
hsa-miR-362-5p	MIMAT0000705	CDC25C	-0.513946	2.97289	0.0281381	-3.72617	0.0195059	FALSE	-	FALSE	-	FALSE	-
hsa-miR-29a	MIMAT0000086	CDC25C	-0.69428	2.97289	0.0281381	-3.59987	1.48e-05	FALSE	-	FALSE	-	FALSE	-
hsa-miR-650	MIMAT0003320	CDC25C	-0.534859	2.97289	0.0281381	-2.82359	0.000641415	FALSE	-	FALSE	-	FALSE	-
hsa-miR-500a*	MIMAT0002871	CDC25C	-0.597689	2.97289	0.0281381	-2.69328	0.0492036	FALSE	-	FALSE	-	FALSE	-
hsa-miR-22	MIMAT0000077	CDC25C	-0.65495	2.97289	0.0281381	-2.15966	0.0040731	FALSE	-	FALSE	-	FALSE	-
hsa-miR-193b	MIMAT0002819	CDC25C	-0.590394	2.97289	0.0281381	-2.11453	7.87e-05	FALSE	-	FALSE	-	FALSE	-
hsa-miR-204	MIMAT0000265	CDC45	-0.541396	2.96755	0.0464878	-36.81	0.00154679	FALSE	-	FALSE	-	FALSE	-
hsa-miR-30a*	MIMAT0000088	CDC45	-0.548397	2.96755	0.0464878	-18.8146	0.00022834	FALSE	-	FALSE	-	FALSE	-
hsa-miR-29c	MIMAT0000681	CDC45	-0.666523	2.96755	0.0464878	-6.41599	7.63e-10	FALSE	-	FALSE	-	FALSE	-
hsa-miR-29b	MIMAT0000100	CDC45	-0.6376	2.96755	0.0464878	-6.05381	1.53e-09	FALSE	-	FALSE	-	FALSE	-
hsa-miR-502-3p	MIMAT0004775	CDC45	-0.670947	2.96755	0.0464878	-3.83844	0.0195059	FALSE	-	FALSE	-	FALSE	-
hsa-miR-362-5p	MIMAT0000705	CDC45	-0.533026	2.96755	0.0464878	-3.72617	0.0195059	FALSE	-	FALSE	-	FALSE	-
hsa-miR-29a	MIMAT0000086	CDC45	-0.679458	2.96755	0.0464878	-3.59987	1.48e-05	FALSE	-	FALSE	-	FALSE	-
hsa-miR-500a*	MIMAT0002871	CDC45	-0.560836	2.96755	0.0464878	-2.69328	0.0492036	FALSE	-	FALSE	-	FALSE	-
hsa-miR-192*	MIMAT0004543	CDC45	-0.52586	2.96755	0.0464878	-2.59251	0.0496439	FALSE	-	FALSE	-	FALSE	-
hsa-miR-29c*	MIMAT0004673	CDC45	-0.503114	2.96755	0.0464878	-2.48117	0.0315166	FALSE	-	FALSE	-	FALSE	-
hsa-miR-455-5p	MIMAT0003150	CDC45	-0.544913	2.96755	0.0464878	-2.36193	0.012181	FALSE	-	FALSE	-	FALSE	-
hsa-miR-22	MIMAT0000077	CDC45	-0.647878	2.96755	0.0464878	-2.15966	0.0040731	FALSE	-	FALSE	-	FALSE	-
hsa-miR-193b	MIMAT0002819	CDC45	-0.599122	2.96755	0.0464878	-2.11453	7.87e-05	FALSE	-	FALSE	-	FALSE	-
hsa-miR-29c	MIMAT0000681	CDK1	-0.660012	2.02707	0.000886456	-6.41599	7.63e-10	FALSE	-	FALSE	-	FALSE	-
hsa-miR-29b	MIMAT0000100	CDK1	-0.656323	2.02707	0.000886456	-6.05381	1.53e-09	FALSE	-	FALSE	-	FALSE	-
hsa-miR-502-3p	MIMAT0004775	CDK1	-0.571469	2.02707	0.000886456	-3.83844	0.0195059	FALSE	-	FALSE	-	FALSE	-
hsa-miR-29a	MIMAT0000086	CDK1	-0.708914	2.02707	0.000886456	-3.59987	1.48e-05	FALSE	-	FALSE	-	FALSE	-
hsa-miR-22	MIMAT0000077	CDK1	-0.714866	2.02707	0.000886456	-2.15966	0.0040731	FALSE	-	FALSE	-	FALSE	-
hsa-miR-29c	MIMAT0000681	MAD2L1	-0.720249	2.28679	5.5e-06	-6.41599	7.63e-10	FALSE	-	FALSE	-	FALSE	-
hsa-miR-29b	MIMAT0000100	MAD2L1	-0.765894	2.28679	5.5e-06	-6.05381	1.53e-09	FALSE	-	FALSE	-	FALSE	-
hsa-miR-502-3p	MIMAT0004775	MAD2L1	-0.512649	2.28679	5.5e-06	-3.83844	0.0195059	FALSE	-	FALSE	-	FALSE	-
hsa-miR-29a	MIMAT0000086	MAD2L1	-0.78227	2.28679	5.5e-06	-3.59987	1.48e-05	FALSE	-	FALSE	-	FALSE	-
hsa-miR-145	MIMAT0000437	MAD2L1	-0.520236	2.28679	5.5e-06	-2.30911	0.000190459	FALSE	-	FALSE	-	FALSE	-
hsa-miR-22*	MIMAT0004495	MAD2L1	-0.548262	2.28679	5.5e-06	-2.18871	3.33e-06	FALSE	-	FALSE	-	FALSE	-
hsa-miR-22	MIMAT0000077	MAD2L1	-0.76862	2.28679	5.5e-06	-2.15966	0.0040731	FALSE	-	FALSE	-	FALSE	-
hsa-miR-193b	MIMAT0002819	MAD2L1	-0.578836	2.28679	5.5e-06	-2.11453	7.87e-05	FALSE	-	FALSE	-	FALSE	-
hsa-miR-29b	MIMAT0000100	MCM2	-0.750082	2.2489	0.00332892	-6.05381	1.53e-09	TRUE	miRanda	FALSE	-	FALSE	-
hsa-miR-29c	MIMAT0000681	MCM2	-0.678465	2.2489	0.00332892	-6.41599	7.63e-10	FALSE	-	FALSE	-	FALSE	-
hsa-miR-29a	MIMAT0000086	MCM2	-0.792456	2.2489	0.00332892	-3.59987	1.48e-05	FALSE	-	FALSE	-	FALSE	-
hsa-miR-29c*	MIMAT0004673	MCM2	-0.545197	2.2489	0.00332892	-2.48117	0.0315166	FALSE	-	FALSE	-	FALSE	-
hsa-miR-145	MIMAT0000437	MCM2	-0.604628	2.2489	0.00332892	-2.30911	0.000190459	FALSE	-	FALSE	-	FALSE	-
hsa-miR-22*	MIMAT0004495	MCM2	-0.586138	2.2489	0.00332892	-2.18871	3.33e-06	FALSE	-	FALSE	-	FALSE	-
hsa-miR-22	MIMAT0000077	MCM2	-0.767808	2.2489	0.00332892	-2.15966	0.0040731	FALSE	-	FALSE	-	FALSE	-
hsa-miR-204	MIMAT0000265	ORC1	-0.524053	2.22628	4.68e-06	-36.81	0.00154679	FALSE	-	FALSE	-	FALSE	-
hsa-miR-30a*	MIMAT0000088	ORC1	-0.519017	2.22628	4.68e-06	-18.8146	0.00022834	FALSE	-	FALSE	-	FALSE	-
hsa-miR-30a	MIMAT0000087	ORC1	-0.545894	2.22628	4.68e-06	-16.9463	7.4e-12	FALSE	-	FALSE	-	FALSE	-
hsa-miR-29c	MIMAT0000681	ORC1	-0.654545	2.22628	4.68e-06	-6.41599	7.63e-10	FALSE	-	FALSE	-	FALSE	-
hsa-miR-29b	MIMAT0000100	ORC1	-0.5901	2.22628	4.68e-06	-6.05381	1.53e-09	FALSE	-	FALSE	-	FALSE	-
hsa-miR-30d	MIMAT0000245	ORC1	-0.504855	2.22628	4.68e-06	-4.08877	0.0040731	FALSE	-	FALSE	-	FALSE	-
hsa-miR-502-3p	MIMAT0004775	ORC1	-0.65766	2.22628	4.68e-06	-3.83844	0.0195059	FALSE	-	FALSE	-	FALSE	-
hsa-miR-29a	MIMAT0000086	ORC1	-0.643745	2.22628	4.68e-06	-3.59987	1.48e-05	FALSE	-	FALSE	-	FALSE	-
hsa-miR-500a*	MIMAT0002871	ORC1	-0.570553	2.22628	4.68e-06	-2.69328	0.0492036	FALSE	-	FALSE	-	FALSE	-
hsa-miR-3619	MIMAT0017999	ORC1	-0.534371	2.22628	4.68e-06	-2.22165	7.57e-06	FALSE	-	FALSE	-	FALSE	-
hsa-miR-22	MIMAT0000077	ORC1	-0.703156	2.22628	4.68e-06	-2.15966	0.0040731	FALSE	-	FALSE	-	FALSE	-
hsa-miR-193b	MIMAT0002819	ORC1	-0.622748	2.22628	4.68e-06	-2.11453	7.87e-05	FALSE	-	FALSE	-	FALSE	-
hsa-miR-204	MIMAT0000265	ORC6	-0.574595	2.74163	0.000116404	-36.81	0.00154679	FALSE	-	FALSE	-	FALSE	-
hsa-miR-30a*	MIMAT0000088	ORC6	-0.518737	2.74163	0.000116404	-18.8146	0.00022834	FALSE	-	FALSE	-	FALSE	-
hsa-miR-514	MIMAT0002883	ORC6	-0.549155	2.74163	0.000116404	-9.56105	0.0315166	FALSE	-	FALSE	-	FALSE	-
hsa-miR-29c	MIMAT0000681	ORC6	-0.702415	2.74163	0.000116404	-6.41599	7.63e-10	FALSE	-	FALSE	-	FALSE	-
hsa-miR-29b	MIMAT0000100	ORC6	-0.701642	2.74163	0.000116404	-6.05381	1.53e-09	FALSE	-	FALSE	-	FALSE	-
hsa-miR-502-3p	MIMAT0004775	ORC6	-0.603422	2.74163	0.000116404	-3.83844	0.0195059	FALSE	-	FALSE	-	FALSE	-
hsa-miR-29a	MIMAT0000086	ORC6	-0.75153	2.74163	0.000116404	-3.59987	1.48e-05	FALSE	-	FALSE	-	FALSE	-
hsa-miR-192*	MIMAT0004543	ORC6	-0.524264	2.74163	0.000116404	-2.59251	0.0496439	FALSE	-	FALSE	-	FALSE	-
hsa-miR-29c*	MIMAT0004673	ORC6	-0.589761	2.74163	0.000116404	-2.48117	0.0315166	FALSE	-	FALSE	-	FALSE	-
hsa-miR-145	MIMAT0000437	ORC6	-0.593766	2.74163	0.000116404	-2.30911	0.000190459	FALSE	-	FALSE	-	FALSE	-
hsa-miR-3619	MIMAT0017999	ORC6	-0.501232	2.74163	0.000116404	-2.22165	7.57e-06	FALSE	-	FALSE	-	FALSE	-
hsa-miR-22*	MIMAT0004495	ORC6	-0.592001	2.74163	0.000116404	-2.18871	3.33e-06	FALSE	-	FALSE	-	FALSE	-
hsa-miR-22	MIMAT0000077	ORC6	-0.764424	2.74163	0.000116404	-2.15966	0.0040731	FALSE	-	FALSE	-	FALSE	-
hsa-miR-362-3p	MIMAT0004683	PTTG1	-0.529624	3.14153	0.0202409	-3.80364	0.00120223	TRUE	miRanda,Targetscan	FALSE	-	FALSE	-
hsa-miR-194	MIMAT0000460	PTTG1	-0.502031	3.14153	0.0202409	-46.2178	9.52e-10	FALSE	-	FALSE	-	FALSE	-
hsa-miR-204	MIMAT0000265	PTTG1	-0.552949	3.14153	0.0202409	-36.81	0.00154679	FALSE	-	FALSE	-	FALSE	-
hsa-miR-30a*	MIMAT0000088	PTTG1	-0.577846	3.14153	0.0202409	-18.8146	0.00022834	FALSE	-	FALSE	-	FALSE	-
hsa-miR-30a	MIMAT0000087	PTTG1	-0.506283	3.14153	0.0202409	-16.9463	7.4e-12	FALSE	-	FALSE	-	FALSE	-
hsa-miR-514	MIMAT0002883	PTTG1	-0.525102	3.14153	0.0202409	-9.56105	0.0315166	FALSE	-	FALSE	-	FALSE	-
hsa-miR-29c	MIMAT0000681	PTTG1	-0.709157	3.14153	0.0202409	-6.41599	7.63e-10	FALSE	-	FALSE	-	FALSE	-
hsa-miR-29b	MIMAT0000100	PTTG1	-0.700943	3.14153	0.0202409	-6.05381	1.53e-09	FALSE	-	FALSE	-	FALSE	-
hsa-miR-532-3p	MIMAT0004780	PTTG1	-0.543587	3.14153	0.0202409	-5.3682	0.00494485	FALSE	-	FALSE	-	FALSE	-
hsa-miR-502-3p	MIMAT0004775	PTTG1	-0.698735	3.14153	0.0202409	-3.83844	0.0195059	FALSE	-	FALSE	-	FALSE	-
hsa-miR-362-5p	MIMAT0000705	PTTG1	-0.57193	3.14153	0.0202409	-3.72617	0.0195059	FALSE	-	FALSE	-	FALSE	-
hsa-miR-29a	MIMAT0000086	PTTG1	-0.752101	3.14153	0.0202409	-3.59987	1.48e-05	FALSE	-	FALSE	-	FALSE	-
hsa-miR-650	MIMAT0003320	PTTG1	-0.526617	3.14153	0.0202409	-2.82359	0.000641415	FALSE	-	FALSE	-	FALSE	-
hsa-miR-500a*	MIMAT0002871	PTTG1	-0.590353	3.14153	0.0202409	-2.69328	0.0492036	FALSE	-	FALSE	-	FALSE	-
hsa-miR-192*	MIMAT0004543	PTTG1	-0.587512	3.14153	0.0202409	-2.59251	0.0496439	FALSE	-	FALSE	-	FALSE	-
hsa-miR-29c*	MIMAT0004673	PTTG1	-0.550327	3.14153	0.0202409	-2.48117	0.0315166	FALSE	-	FALSE	-	FALSE	-
hsa-miR-455-5p	MIMAT0003150	PTTG1	-0.535744	3.14153	0.0202409	-2.36193	0.012181	FALSE	-	FALSE	-	FALSE	-
hsa-miR-145	MIMAT0000437	PTTG1	-0.541792	3.14153	0.0202409	-2.30911	0.000190459	FALSE	-	FALSE	-	FALSE	-
hsa-miR-22*	MIMAT0004495	PTTG1	-0.525123	3.14153	0.0202409	-2.18871	3.33e-06	FALSE	-	FALSE	-	FALSE	-
hsa-miR-22	MIMAT0000077	PTTG1	-0.669167	3.14153	0.0202409	-2.15966	0.0040731	FALSE	-	FALSE	-	FALSE	-
hsa-miR-193b	MIMAT0002819	PTTG1	-0.554427	3.14153	0.0202409	-2.11453	7.87e-05	FALSE	-	FALSE	-	FALSE	-
hsa-miR-204	MIMAT0000265	PTTG2	-0.507884	2.70375	0.0179199	-36.81	0.00154679	FALSE	-	FALSE	-	FALSE	-
hsa-miR-30a*	MIMAT0000088	PTTG2	-0.533704	2.70375	0.0179199	-18.8146	0.00022834	FALSE	-	FALSE	-	FALSE	-
hsa-miR-514	MIMAT0002883	PTTG2	-0.503847	2.70375	0.0179199	-9.56105	0.0315166	FALSE	-	FALSE	-	FALSE	-
hsa-miR-29c	MIMAT0000681	PTTG2	-0.668384	2.70375	0.0179199	-6.41599	7.63e-10	FALSE	-	FALSE	-	FALSE	-
hsa-miR-29b	MIMAT0000100	PTTG2	-0.657663	2.70375	0.0179199	-6.05381	1.53e-09	FALSE	-	FALSE	-	FALSE	-
hsa-miR-532-3p	MIMAT0004780	PTTG2	-0.574198	2.70375	0.0179199	-5.3682	0.00494485	FALSE	-	FALSE	-	FALSE	-
hsa-miR-502-3p	MIMAT0004775	PTTG2	-0.707395	2.70375	0.0179199	-3.83844	0.0195059	FALSE	-	FALSE	-	FALSE	-
hsa-miR-362-3p	MIMAT0004683	PTTG2	-0.524394	2.70375	0.0179199	-3.80364	0.00120223	FALSE	-	FALSE	-	FALSE	-
hsa-miR-362-5p	MIMAT0000705	PTTG2	-0.577125	2.70375	0.0179199	-3.72617	0.0195059	FALSE	-	FALSE	-	FALSE	-
hsa-miR-29a	MIMAT0000086	PTTG2	-0.712944	2.70375	0.0179199	-3.59987	1.48e-05	FALSE	-	FALSE	-	FALSE	-
hsa-miR-650	MIMAT0003320	PTTG2	-0.537963	2.70375	0.0179199	-2.82359	0.000641415	FALSE	-	FALSE	-	FALSE	-
hsa-miR-500a*	MIMAT0002871	PTTG2	-0.617335	2.70375	0.0179199	-2.69328	0.0492036	FALSE	-	FALSE	-	FALSE	-
hsa-miR-192*	MIMAT0004543	PTTG2	-0.539827	2.70375	0.0179199	-2.59251	0.0496439	FALSE	-	FALSE	-	FALSE	-
hsa-miR-455-5p	MIMAT0003150	PTTG2	-0.519374	2.70375	0.0179199	-2.36193	0.012181	FALSE	-	FALSE	-	FALSE	-
hsa-miR-145	MIMAT0000437	PTTG2	-0.503461	2.70375	0.0179199	-2.30911	0.000190459	FALSE	-	FALSE	-	FALSE	-
hsa-miR-22	MIMAT0000077	PTTG2	-0.664784	2.70375	0.0179199	-2.15966	0.0040731	FALSE	-	FALSE	-	FALSE	-
hsa-miR-193b	MIMAT0002819	PTTG2	-0.561307	2.70375	0.0179199	-2.11453	7.87e-05	FALSE	-	FALSE	-	FALSE	-
hsa-miR-4280	MIMAT0016911	PTTG2	-0.501386	2.70375	0.0179199	-2.08514	0.00616155	FALSE	-	FALSE	-	FALSE	-
hsa-miR-192	MIMAT0000222	TGFB3	-0.615905	2.70238	0.000908301	-28.5527	0.00455468	TRUE	miRanda,miRWalk,RNA22	FALSE	-	FALSE	-
hsa-miR-509-5p	MIMAT0004779	TGFB3	-0.519746	2.70238	0.000908301	-2.87305	0.0406154	TRUE	miRanda,Targetscan	FALSE	-	FALSE	-
hsa-miR-194	MIMAT0000460	TGFB3	-0.62919	2.70238	0.000908301	-46.2178	9.52e-10	FALSE	-	FALSE	-	FALSE	-
hsa-miR-429	MIMAT0001536	TGFB3	-0.502157	2.70238	0.000908301	-28.4646	9.52e-10	FALSE	-	FALSE	-	FALSE	-
hsa-miR-1973	MIMAT0009448	TGFB3	-0.545653	2.70238	0.000908301	-22.3522	0.00154679	FALSE	-	FALSE	-	FALSE	-
hsa-miR-514	MIMAT0002883	TGFB3	-0.620673	2.70238	0.000908301	-9.56105	0.0315166	FALSE	-	FALSE	-	FALSE	-
hsa-miR-30c-2*	MIMAT0004550	TGFB3	-0.55395	2.70238	0.000908301	-7.05949	0.000128821	FALSE	-	FALSE	-	FALSE	-
hsa-miR-184	MIMAT0000454	TGFB3	-0.631493	2.70238	0.000908301	-3.77856	0.0471754	FALSE	-	FALSE	-	FALSE	-
hsa-miR-30e	MIMAT0000692	TGFB3	-0.513546	2.70238	0.000908301	-3.67906	0.000527046	FALSE	-	FALSE	-	FALSE	-
hsa-miR-650	MIMAT0003320	TGFB3	-0.548626	2.70238	0.000908301	-2.82359	0.000641415	FALSE	-	FALSE	-	FALSE	-
hsa-miR-192*	MIMAT0004543	TGFB3	-0.57939	2.70238	0.000908301	-2.59251	0.0496439	FALSE	-	FALSE	-	FALSE	-
hsa-miR-4254	MIMAT0016884	TGFB3	-0.503509	2.70238	0.000908301	-2.23216	0.044083	FALSE	-	FALSE	-	FALSE	-
hsa-miR-145	MIMAT0000437	TTK	-0.520062	4.02772	0.00666275	-2.30911	0.000190459	TRUE	miRanda	FALSE	-	FALSE	-
hsa-miR-204	MIMAT0000265	TTK	-0.560848	4.02772	0.00666275	-36.81	0.00154679	FALSE	-	FALSE	-	FALSE	-
hsa-miR-30a*	MIMAT0000088	TTK	-0.530337	4.02772	0.00666275	-18.8146	0.00022834	FALSE	-	FALSE	-	FALSE	-
hsa-miR-514	MIMAT0002883	TTK	-0.54109	4.02772	0.00666275	-9.56105	0.0315166	FALSE	-	FALSE	-	FALSE	-
hsa-miR-29c	MIMAT0000681	TTK	-0.736575	4.02772	0.00666275	-6.41599	7.63e-10	FALSE	-	FALSE	-	FALSE	-
hsa-miR-29b	MIMAT0000100	TTK	-0.729582	4.02772	0.00666275	-6.05381	1.53e-09	FALSE	-	FALSE	-	FALSE	-
hsa-miR-502-3p	MIMAT0004775	TTK	-0.593179	4.02772	0.00666275	-3.83844	0.0195059	FALSE	-	FALSE	-	FALSE	-
hsa-miR-29a	MIMAT0000086	TTK	-0.765447	4.02772	0.00666275	-3.59987	1.48e-05	FALSE	-	FALSE	-	FALSE	-
hsa-miR-650	MIMAT0003320	TTK	-0.550236	4.02772	0.00666275	-2.82359	0.000641415	FALSE	-	FALSE	-	FALSE	-
hsa-miR-192*	MIMAT0004543	TTK	-0.592443	4.02772	0.00666275	-2.59251	0.0496439	FALSE	-	FALSE	-	FALSE	-
hsa-miR-29c*	MIMAT0004673	TTK	-0.590245	4.02772	0.00666275	-2.48117	0.0315166	FALSE	-	FALSE	-	FALSE	-
hsa-miR-22*	MIMAT0004495	TTK	-0.511414	4.02772	0.00666275	-2.18871	3.33e-06	FALSE	-	FALSE	-	FALSE	-
hsa-miR-22	MIMAT0000077	TTK	-0.687979	4.02772	0.00666275	-2.15966	0.0040731	FALSE	-	FALSE	-	FALSE	-
hsa-miR-193b	MIMAT0002819	TTK	-0.561919	4.02772	0.00666275	-2.11453	7.87e-05	FALSE	-	FALSE	-	FALSE	-
hsa-miR-500a*	MIMAT0002871	FADS2	-0.521419	2.16184	0.0386981	-2.69328	0.0492036	FALSE	-	TRUE	CLASH	FALSE	-
hsa-miR-30d	MIMAT0000245	FBN2	-0.540545	4.67449	0.00603551	-4.08877	0.0040731	TRUE	miRanda	TRUE	CLASH	FALSE	-
hsa-miR-193b	MIMAT0002819	HIST1H1B	-0.599044	3.41427	0.0288055	-2.11453	7.87e-05	FALSE	-	TRUE	CLASH	FALSE	-
hsa-miR-193b	MIMAT0002819	HIST1H3B	-0.612343	3.08114	0.0268176	-2.11453	7.87e-05	FALSE	-	TRUE	CLASH	FALSE	-
hsa-miR-193b	MIMAT0002819	HIST1H3D	-0.614896	2.32121	0.0221133	-2.11453	7.87e-05	FALSE	-	TRUE	CLASH	FALSE	-
hsa-miR-193b	MIMAT0002819	LMNB1	-0.571519	3.11358	0.00479045	-2.11453	7.87e-05	FALSE	-	TRUE	CLASH	FALSE	-
hsa-miR-193b	MIMAT0002819	LMNB2	-0.562217	2.23926	0.00527088	-2.11453	7.87e-05	FALSE	-	TRUE	CLASH	FALSE	-
hsa-miR-30d	MIMAT0000245	MAP1B	-0.552667	2.29867	0.0493932	-4.08877	0.0040731	FALSE	-	TRUE	CLASH	FALSE	-
hsa-miR-29b	MIMAT0000100	MKI67	-0.650941	3.33482	0.040057	-6.05381	1.53e-09	FALSE	-	TRUE	CLASH	FALSE	-
hsa-miR-29b	MIMAT0000100	NREP	-0.788907	2.20341	3.11e-06	-6.05381	1.53e-09	FALSE	-	TRUE	CLASH	FALSE	-
hsa-miR-30b	MIMAT0000420	OLFML2B	-0.666667	3.31184	0.000654675	-5.18561	2.83e-06	TRUE	miRanda	TRUE	CLASH	FALSE	-
hsa-miR-30a*	MIMAT0000088	RPL27A	-0.541158	2.42417	0.000118157	-18.8146	0.00022834	TRUE	miRanda,miRWalk	TRUE	CLASH	FALSE	-
hsa-miR-342-3p	MIMAT0000753	SLC6A12	-0.516036	-4.44872	0.000243349	2.3406	0.0190592	FALSE	-	TRUE	CLASH	FALSE	-
hsa-miR-30a	MIMAT0000087	TUBA1B	-0.738084	2.01459	8.73e-06	-16.9463	7.4e-12	FALSE	-	TRUE	CLASH	FALSE	-
hsa-miR-193b	MIMAT0002819	TUBB	-0.639475	2.07137	3.98e-07	-2.11453	7.87e-05	FALSE	-	TRUE	CLASH	FALSE	-
hsa-miR-193b	MIMAT0002819	UNC5B	-0.538987	2.83195	0.0022948	-2.11453	7.87e-05	TRUE	miRanda,miRWalk,Targetscan	TRUE	CLASH	FALSE	-
hsa-miR-192	MIMAT0000222	ASPM	-0.591851	4.26673	0.0264292	-28.5527	0.00455468	FALSE	-	TRUE	Microarray	FALSE	-
hsa-miR-193b	MIMAT0002819	ASPM	-0.563077	4.26673	0.0264292	-2.11453	7.87e-05	FALSE	-	TRUE	Microarray	FALSE	-
hsa-miR-192	MIMAT0000222	ATAD2	-0.60516	2.41208	0.0112784	-28.5527	0.00455468	FALSE	-	TRUE	Microarray	FALSE	-
hsa-miR-192	MIMAT0000222	ATAD5	-0.701665	2.44525	9.48e-05	-28.5527	0.00455468	FALSE	-	TRUE	Microarray	FALSE	-
hsa-miR-192	MIMAT0000222	BLM	-0.697909	3.58669	0.0148484	-28.5527	0.00455468	FALSE	-	TRUE	Microarray	FALSE	-
hsa-miR-193b	MIMAT0002819	BLM	-0.634231	3.58669	0.0148484	-2.11453	7.87e-05	FALSE	-	TRUE	Microarray	FALSE	-
hsa-miR-192	MIMAT0000222	BRCA1	-0.508034	2.00407	0.00021325	-28.5527	0.00455468	TRUE	miRanda,miRWalk	TRUE	Microarray	FALSE	-
hsa-miR-193b	MIMAT0002819	BRCA1	-0.535554	2.00407	0.00021325	-2.11453	7.87e-05	FALSE	-	TRUE	Microarray	FALSE	-
hsa-miR-192	MIMAT0000222	BRCA2	-0.778773	2.75604	0.00720042	-28.5527	0.00455468	FALSE	-	TRUE	Microarray	FALSE	-
hsa-miR-193b	MIMAT0002819	C16orf59	-0.565778	2.65735	0.0134798	-2.11453	7.87e-05	FALSE	-	TRUE	Microarray	FALSE	-
hsa-miR-193b	MIMAT0002819	CDCA2	-0.554239	2.89662	0.0328008	-2.11453	7.87e-05	FALSE	-	TRUE	Microarray	FALSE	-
hsa-miR-192	MIMAT0000222	CENPA	-0.548865	4.20913	0.0153863	-28.5527	0.00455468	FALSE	-	TRUE	Microarray	FALSE	-
hsa-miR-192	MIMAT0000222	CENPE	-0.684326	3.78759	0.0341564	-28.5527	0.00455468	FALSE	-	TRUE	Microarray	FALSE	-
hsa-miR-192	MIMAT0000222	CENPF	-0.511688	3.87258	0.0463873	-28.5527	0.00455468	FALSE	-	TRUE	Microarray	FALSE	-
hsa-miR-192	MIMAT0000222	CENPK	-0.593572	3.00016	0.047085	-28.5527	0.00455468	TRUE	miRanda	TRUE	Microarray	FALSE	-
hsa-miR-192	MIMAT0000222	CHSY3	-0.626902	2.49533	0.00837374	-28.5527	0.00455468	FALSE	-	TRUE	Microarray	FALSE	-
hsa-miR-193b	MIMAT0002819	CKAP2L	-0.507306	3.29941	0.0314127	-2.11453	7.87e-05	TRUE	miRanda,miRWalk	TRUE	Microarray	FALSE	-
hsa-miR-192	MIMAT0000222	E2F8	-0.546317	2.88478	1.49e-06	-28.5527	0.00455468	FALSE	-	TRUE	Microarray	FALSE	-
hsa-miR-192	MIMAT0000222	EMB	-0.605168	2.16844	0.0188176	-28.5527	0.00455468	FALSE	-	TRUE	Microarray	FALSE	-
hsa-miR-192	MIMAT0000222	EME1	-0.691185	2.32145	0.0350446	-28.5527	0.00455468	FALSE	-	TRUE	Microarray	FALSE	-
hsa-miR-192	MIMAT0000222	ESCO2	-0.543669	3.30483	0.0223686	-28.5527	0.00455468	FALSE	-	TRUE	Microarray	FALSE	-
hsa-miR-193b	MIMAT0002819	EZH2	-0.602213	2.65751	0.00120367	-2.11453	7.87e-05	FALSE	-	TRUE	Microarray	FALSE	-
hsa-miR-193b	MIMAT0002819	FANCA	-0.540357	2.65871	0.00488273	-2.11453	7.87e-05	TRUE	miRWalk	TRUE	Microarray	FALSE	-
hsa-miR-192	MIMAT0000222	FANCI	-0.603624	2.23377	0.00822961	-28.5527	0.00455468	TRUE	miRanda	TRUE	Microarray	FALSE	-
hsa-miR-193b	MIMAT0002819	FANCI	-0.628236	2.23377	0.00822961	-2.11453	7.87e-05	FALSE	-	TRUE	Microarray	FALSE	-
hsa-miR-192	MIMAT0000222	FBN1	-0.670986	2.35883	1.63e-05	-28.5527	0.00455468	TRUE	miRanda	TRUE	Microarray	FALSE	-
hsa-miR-193b	MIMAT0002819	FBXO5	-0.520409	2.0579	1.14e-07	-2.11453	7.87e-05	FALSE	-	TRUE	Microarray	FALSE	-
hsa-miR-204	MIMAT0000265	HAS2	-0.599594	5.56178	6.19e-10	-36.81	0.00154679	TRUE	miRanda,miRDB,Targetscan	TRUE	Microarray	FALSE	-
hsa-miR-192	MIMAT0000222	IGDCC4	-0.79253	3.88849	0.0157188	-28.5527	0.00455468	FALSE	-	TRUE	Microarray	FALSE	-
hsa-miR-193b	MIMAT0002819	KIAA0101	-0.529991	3.33996	0.0305659	-2.11453	7.87e-05	FALSE	-	TRUE	Microarray	FALSE	-
hsa-miR-193b	MIMAT0002819	KIF11	-0.504471	2.16667	0.00072028	-2.11453	7.87e-05	FALSE	-	TRUE	Microarray	FALSE	-
hsa-miR-192	MIMAT0000222	KIF14	-0.576904	4.21471	0.04859	-28.5527	0.00455468	TRUE	miRanda	TRUE	Microarray	FALSE	-
hsa-miR-192	MIMAT0000222	KIF15	-0.530702	3.92555	0.0281881	-28.5527	0.00455468	FALSE	-	TRUE	Microarray	FALSE	-
hsa-miR-193b	MIMAT0002819	KIF15	-0.533156	3.92555	0.0281881	-2.11453	7.87e-05	FALSE	-	TRUE	Microarray	FALSE	-
hsa-miR-192	MIMAT0000222	KIF20A	-0.520063	3.89543	0.0469251	-28.5527	0.00455468	FALSE	-	TRUE	Microarray	FALSE	-
hsa-miR-192	MIMAT0000222	LMNB1	-0.519739	3.11358	0.00479045	-28.5527	0.00455468	FALSE	-	TRUE	Microarray	FALSE	-
hsa-miR-192	MIMAT0000222	LOXL2	-0.826406	3.45391	0.000757674	-28.5527	0.00455468	TRUE	miRanda,miRWalk,Targetscan	TRUE	Microarray	FALSE	-
hsa-miR-192	MIMAT0000222	MEX3B	-0.602493	3.95631	8.41e-06	-28.5527	0.00455468	FALSE	-	TRUE	Microarray	FALSE	-
hsa-miR-192	MIMAT0000222	MIS18BP1	-0.782246	2.04869	0.00215503	-28.5527	0.00455468	FALSE	-	TRUE	Microarray	FALSE	-
hsa-miR-192	MIMAT0000222	MKI67	-0.567611	3.33482	0.040057	-28.5527	0.00455468	TRUE	miRanda	TRUE	Microarray	FALSE	-
hsa-miR-193b	MIMAT0002819	NCAPG	-0.51073	3.67686	0.00745127	-2.11453	7.87e-05	FALSE	-	TRUE	Microarray	FALSE	-
hsa-miR-193b	MIMAT0002819	OIP5	-0.502224	3.1474	0.00454842	-2.11453	7.87e-05	FALSE	-	TRUE	Microarray	FALSE	-
hsa-miR-192	MIMAT0000222	PDLIM3	-0.634328	3.72788	0.00362772	-28.5527	0.00455468	FALSE	-	TRUE	Microarray	FALSE	-
hsa-miR-193b	MIMAT0002819	POLE2	-0.529872	2.47162	0.00153957	-2.11453	7.87e-05	FALSE	-	TRUE	Microarray	FALSE	-
hsa-miR-192	MIMAT0000222	POLQ	-0.584063	3.00149	0.0248069	-28.5527	0.00455468	TRUE	miRanda,Targetscan	TRUE	Microarray	FALSE	-
hsa-miR-193b	MIMAT0002819	POLQ	-0.636587	3.00149	0.0248069	-2.11453	7.87e-05	FALSE	-	TRUE	Microarray	FALSE	-
hsa-miR-193b	MIMAT0002819	PSRC1	-0.505772	2.25396	0.0247043	-2.11453	7.87e-05	TRUE	miRanda,miRDB,miRWalk,Targetscan	TRUE	Microarray	FALSE	-
hsa-miR-192	MIMAT0000222	PXDN	-0.853668	3.53578	0.0031976	-28.5527	0.00455468	TRUE	miRanda,miRWalk	TRUE	Microarray	FALSE	-
hsa-miR-193b	MIMAT0002819	RAD51	-0.584048	2.6272	0.00310597	-2.11453	7.87e-05	TRUE	miRanda,miRWalk,Targetscan	TRUE	Microarray	FALSE	-
hsa-miR-193b	MIMAT0002819	RTKN2	-0.506991	2.70059	0.00527822	-2.11453	7.87e-05	FALSE	-	TRUE	Microarray	FALSE	-
hsa-miR-193b	MIMAT0002819	SGOL1	-0.626166	2.22964	0.0173707	-2.11453	7.87e-05	FALSE	-	TRUE	Microarray	FALSE	-
hsa-miR-192	MIMAT0000222	SLC7A11	-0.664626	5.07776	0.00120125	-28.5527	0.00455468	TRUE	miRanda,Targetscan	TRUE	Microarray	FALSE	-
hsa-miR-192	MIMAT0000222	STIL	-0.585906	2.14979	0.00565975	-28.5527	0.00455468	FALSE	-	TRUE	Microarray	FALSE	-
hsa-miR-193b	MIMAT0002819	TICRR	-0.597308	2.52031	0.00760898	-2.11453	7.87e-05	FALSE	-	TRUE	Microarray	FALSE	-
hsa-miR-192	MIMAT0000222	TRAIP	-0.586223	2.56613	0.000127128	-28.5527	0.00455468	TRUE	miRanda,miRWalk,Targetscan	TRUE	Microarray	FALSE	-
hsa-miR-193b	MIMAT0002819	UBE2C	-0.569502	3.78152	0.0410633	-2.11453	7.87e-05	FALSE	-	TRUE	Microarray	FALSE	-
hsa-miR-192	MIMAT0000222	WDR76	-0.51135	2.23865	1.35e-07	-28.5527	0.00455468	FALSE	-	TRUE	Microarray	FALSE	-
hsa-miR-193b	MIMAT0002819	MCM10	-0.55309	3.42197	0.00581684	-2.11453	7.87e-05	FALSE	-	TRUE	Microarray,CLASH	FALSE	-
hsa-miR-34a	MIMAT0000255	AKR7L	-0.677636	-2.85535	1.36e-05	5.47031	0.0483291	FALSE	-	TRUE	Proteomics	FALSE	-
hsa-miR-30a	MIMAT0000087	FSCN1	-0.645456	2.76127	0.000359246	-16.9463	7.4e-12	FALSE	-	TRUE	Proteomics	FALSE	-
hsa-miR-30a	MIMAT0000087	PDLIM7	-0.536633	2.23043	0.00161131	-16.9463	7.4e-12	FALSE	-	TRUE	Proteomics	FALSE	-
hsa-miR-193b	MIMAT0002819	TUBA1B	-0.575315	2.01459	8.73e-06	-2.11453	7.87e-05	FALSE	-	TRUE	Proteomics	FALSE	-
hsa-miR-30a	MIMAT0000087	LMNB2	-0.522782	2.23926	0.00527088	-16.9463	7.4e-12	TRUE	miRanda,miRWalk,Targetscan	TRUE	pSILAC//Proteomics;Other	FALSE	-
hsa-miR-30a	MIMAT0000087	SLC7A11	-0.622277	5.07776	0.00120125	-16.9463	7.4e-12	TRUE	miRanda,Targetscan	TRUE	pSILAC//Proteomics;Other	FALSE	-
hsa-miR-29a	MIMAT0000086	TET1	-0.702911	2.45068	0.00273701	-3.59987	1.48e-05	TRUE	miRanda,miRDB,miRWalk,Targetscan	TRUE	qRT-PCR	TRUE	TargetScan,PicTar,miRanda
hsa-miR-130b	MIMAT0000691	NCKAP5	-0.547924	-2.07839	0.000825638	3.80083	0.00520967	FALSE	-	TRUE	Sequencing	FALSE	-
hsa-miR-29c	MIMAT0000681	OIP5	-0.774859	3.1474	0.00454842	-6.41599	7.63e-10	TRUE	miRanda	TRUE	Sequencing	FALSE	-
hsa-miR-29c	MIMAT0000681	PURG	-0.521171	2.43296	5.87e-06	-6.41599	7.63e-10	TRUE	miRanda,miRDB,miRWalk	TRUE	Sequencing	TRUE	TargetScan,PicTar,PITA,miRanda
hsa-miR-34a	MIMAT0000255	TPPP	-0.523925	-2.96182	3.75e-07	5.47031	0.0483291	TRUE	miRanda,miRDB,miRWalk,Targetscan	TRUE	Sequencing	FALSE	-
hsa-miR-34a	MIMAT0000255	TPD52	-0.548569	-2.44524	1.3e-07	5.47031	0.0483291	TRUE	miRanda,miRWalk,Targetscan	TRUE	Sequencing,Proteomics	TRUE	TargetScan,PicTar,PITA,miRanda
hsa-miR-149	MIMAT0000450	A1CF	-0.511818	-4.98149	1.35e-12	2.291	0.0120225	FALSE	-	FALSE	-	FALSE	-
hsa-miR-342-3p	MIMAT0000753	A1CF	-0.675572	-4.98149	1.35e-12	2.3406	0.0190592	FALSE	-	FALSE	-	FALSE	-
hsa-miR-130b	MIMAT0000691	A1CF	-0.534786	-4.98149	1.35e-12	3.80083	0.00520967	FALSE	-	FALSE	-	FALSE	-
hsa-miR-483-3p	MIMAT0002173	A1CF	-0.532671	-4.98149	1.35e-12	8.10918	0.0126338	FALSE	-	FALSE	-	FALSE	-
hsa-miR-29b	MIMAT0000100	ABCA12	-0.662066	2.73075	3.32e-05	-6.05381	1.53e-09	TRUE	miRanda	FALSE	-	FALSE	-
hsa-miR-29a	MIMAT0000086	ABCA12	-0.543909	2.73075	3.32e-05	-3.59987	1.48e-05	TRUE	miRanda	FALSE	-	FALSE	-
hsa-miR-514	MIMAT0002883	ABCA12	-0.501749	2.73075	3.32e-05	-9.56105	0.0315166	FALSE	-	FALSE	-	FALSE	-
hsa-miR-149	MIMAT0000450	ABCA8	-0.60802	-2.09807	0.00897283	2.291	0.0120225	FALSE	-	FALSE	-	FALSE	-
hsa-miR-483-3p	MIMAT0002173	ABCA8	-0.563238	-2.09807	0.00897283	8.10918	0.0126338	FALSE	-	FALSE	-	FALSE	-
hsa-miR-149	MIMAT0000450	ABCB1	-0.702568	-3.35057	3.28e-06	2.291	0.0120225	FALSE	-	FALSE	-	FALSE	-
hsa-miR-130b	MIMAT0000691	ABCB1	-0.524053	-3.35057	3.28e-06	3.80083	0.00520967	FALSE	-	FALSE	-	FALSE	-
hsa-miR-342-3p	MIMAT0000753	ABCC2	-0.68641	-3.26324	0.0468865	2.3406	0.0190592	FALSE	-	FALSE	-	FALSE	-
hsa-miR-130b	MIMAT0000691	ABCC2	-0.594987	-3.26324	0.0468865	3.80083	0.00520967	FALSE	-	FALSE	-	FALSE	-
hsa-miR-34a	MIMAT0000255	ABCC6	-0.549457	-3.51951	1.39e-10	5.47031	0.0483291	TRUE	miRanda,Targetscan	FALSE	-	FALSE	-
hsa-miR-342-3p	MIMAT0000753	ABCC6P1	-0.593976	-5.3226	7.09e-10	2.3406	0.0190592	FALSE	-	FALSE	-	FALSE	-
hsa-miR-483-3p	MIMAT0002173	ABCC6P1	-0.573317	-5.3226	7.09e-10	8.10918	0.0126338	FALSE	-	FALSE	-	FALSE	-
hsa-miR-192	MIMAT0000222	ABCC9	-0.577509	2.77645	2.93e-07	-28.5527	0.00455468	TRUE	miRanda,Targetscan	FALSE	-	FALSE	-
hsa-miR-30e	MIMAT0000692	ABCC9	-0.505575	2.77645	2.93e-07	-3.67906	0.000527046	TRUE	miRanda,miRDB,Targetscan	FALSE	-	FALSE	-
hsa-miR-194	MIMAT0000460	ABCC9	-0.616618	2.77645	2.93e-07	-46.2178	9.52e-10	FALSE	-	FALSE	-	FALSE	-
hsa-miR-4284	MIMAT0016915	ABCC9	-0.51004	2.77645	2.93e-07	-5.84348	0.00234241	FALSE	-	FALSE	-	FALSE	-
hsa-miR-149	MIMAT0000450	ACADL	-0.521508	-5.884	1.34e-05	2.291	0.0120225	FALSE	-	FALSE	-	FALSE	-
hsa-miR-342-3p	MIMAT0000753	ACADL	-0.661146	-5.884	1.34e-05	2.3406	0.0190592	FALSE	-	FALSE	-	FALSE	-
hsa-miR-320c	MIMAT0005793	ACADL	-0.502985	-5.884	1.34e-05	3.59274	3.56e-09	FALSE	-	FALSE	-	FALSE	-
hsa-miR-130b	MIMAT0000691	ACADL	-0.50199	-5.884	1.34e-05	3.80083	0.00520967	FALSE	-	FALSE	-	FALSE	-
hsa-miR-483-3p	MIMAT0002173	ACADL	-0.548824	-5.884	1.34e-05	8.10918	0.0126338	FALSE	-	FALSE	-	FALSE	-
hsa-miR-342-3p	MIMAT0000753	ACADS	-0.668275	-2.06656	1.45e-05	2.3406	0.0190592	FALSE	-	FALSE	-	FALSE	-
hsa-miR-130b	MIMAT0000691	ACADS	-0.503819	-2.06656	1.45e-05	3.80083	0.00520967	FALSE	-	FALSE	-	FALSE	-
hsa-miR-199b-5p	MIMAT0000263	ACADS	-0.563967	-2.06656	1.45e-05	4.57993	0.00988295	FALSE	-	FALSE	-	FALSE	-
hsa-miR-483-3p	MIMAT0002173	ACADS	-0.539505	-2.06656	1.45e-05	8.10918	0.0126338	FALSE	-	FALSE	-	FALSE	-
hsa-miR-34a	MIMAT0000255	ACADSB	-0.567086	-2.1798	0.00105016	5.47031	0.0483291	TRUE	miRanda,miRWalk,Targetscan	FALSE	-	FALSE	-
hsa-miR-483-3p	MIMAT0002173	ACADSB	-0.5646	-2.1798	0.00105016	8.10918	0.0126338	TRUE	miRanda,miRWalk,Targetscan	FALSE	-	FALSE	-
hsa-miR-194	MIMAT0000460	ACAP1	-0.574745	2.10099	3.77e-05	-46.2178	9.52e-10	FALSE	-	FALSE	-	FALSE	-
hsa-miR-192	MIMAT0000222	ACAP1	-0.528631	2.10099	3.77e-05	-28.5527	0.00455468	FALSE	-	FALSE	-	FALSE	-
hsa-miR-30c	MIMAT0000244	ACAP1	-0.574468	2.10099	3.77e-05	-7.00515	8.66e-09	FALSE	-	FALSE	-	FALSE	-
hsa-miR-30e*	MIMAT0000693	ACAP1	-0.569846	2.10099	3.77e-05	-6.40949	2.86e-08	FALSE	-	FALSE	-	FALSE	-
hsa-miR-4284	MIMAT0016915	ACAP1	-0.56514	2.10099	3.77e-05	-5.84348	0.00234241	FALSE	-	FALSE	-	FALSE	-
hsa-miR-30b	MIMAT0000420	ACAP1	-0.57971	2.10099	3.77e-05	-5.18561	2.83e-06	FALSE	-	FALSE	-	FALSE	-
hsa-miR-4254	MIMAT0016884	ACAP1	-0.508023	2.10099	3.77e-05	-2.23216	0.044083	FALSE	-	FALSE	-	FALSE	-
hsa-miR-23b	MIMAT0000418	ACAP1	-0.500519	2.10099	3.77e-05	-2.22707	0.000137514	FALSE	-	FALSE	-	FALSE	-
hsa-miR-342-3p	MIMAT0000753	ACAT1	-0.593427	-3.16278	0.000919211	2.3406	0.0190592	TRUE	miRanda,miRWalk	FALSE	-	FALSE	-
hsa-miR-320e	MIMAT0015072	ACAT1	-0.50195	-3.16278	0.000919211	2.96208	0.000298489	FALSE	-	FALSE	-	FALSE	-
hsa-miR-320d	MIMAT0006764	ACAT1	-0.509824	-3.16278	0.000919211	3.33924	0.000298489	FALSE	-	FALSE	-	FALSE	-
hsa-miR-199b-5p	MIMAT0000263	ACAT1	-0.550042	-3.16278	0.000919211	4.57993	0.00988295	FALSE	-	FALSE	-	FALSE	-
hsa-miR-483-3p	MIMAT0002173	ACAT1	-0.505459	-3.16278	0.000919211	8.10918	0.0126338	FALSE	-	FALSE	-	FALSE	-
hsa-miR-320e	MIMAT0015072	ACE2	-0.544423	-7.16126	5.52e-05	2.96208	0.000298489	FALSE	-	FALSE	-	FALSE	-
hsa-miR-320d	MIMAT0006764	ACE2	-0.583715	-7.16126	5.52e-05	3.33924	0.000298489	FALSE	-	FALSE	-	FALSE	-
hsa-miR-320c	MIMAT0005793	ACE2	-0.539231	-7.16126	5.52e-05	3.59274	3.56e-09	FALSE	-	FALSE	-	FALSE	-
hsa-miR-149	MIMAT0000450	ACMSD	-0.52293	-7.19107	1.69e-10	2.291	0.0120225	FALSE	-	FALSE	-	FALSE	-
hsa-miR-342-3p	MIMAT0000753	ACMSD	-0.679522	-7.19107	1.69e-10	2.3406	0.0190592	FALSE	-	FALSE	-	FALSE	-
hsa-miR-130b	MIMAT0000691	ACMSD	-0.550281	-7.19107	1.69e-10	3.80083	0.00520967	FALSE	-	FALSE	-	FALSE	-
hsa-miR-483-3p	MIMAT0002173	ACMSD	-0.555829	-7.19107	1.69e-10	8.10918	0.0126338	FALSE	-	FALSE	-	FALSE	-
hsa-miR-342-3p	MIMAT0000753	ACOT11	-0.661412	-2.15695	9.86e-12	2.3406	0.0190592	TRUE	miRanda	FALSE	-	FALSE	-
hsa-miR-320e	MIMAT0015072	ACOT11	-0.506074	-2.15695	9.86e-12	2.96208	0.000298489	FALSE	-	FALSE	-	FALSE	-
hsa-miR-320d	MIMAT0006764	ACOT11	-0.55558	-2.15695	9.86e-12	3.33924	0.000298489	FALSE	-	FALSE	-	FALSE	-
hsa-miR-130b	MIMAT0000691	ACOT11	-0.524034	-2.15695	9.86e-12	3.80083	0.00520967	FALSE	-	FALSE	-	FALSE	-
hsa-miR-199b-5p	MIMAT0000263	ACOT11	-0.622245	-2.15695	9.86e-12	4.57993	0.00988295	FALSE	-	FALSE	-	FALSE	-
hsa-miR-320c	MIMAT0005793	ACOT12	-0.535622	-3.3701	0.00258397	3.59274	3.56e-09	TRUE	miRanda	FALSE	-	FALSE	-
hsa-miR-4327	MIMAT0016889	ACOT12	-0.520973	-3.3701	0.00258397	2.04839	0.0486507	FALSE	-	FALSE	-	FALSE	-
hsa-miR-342-3p	MIMAT0000753	ACOT12	-0.552335	-3.3701	0.00258397	2.3406	0.0190592	FALSE	-	FALSE	-	FALSE	-
hsa-miR-1268	MIMAT0005922	ACOT12	-0.515347	-3.3701	0.00258397	2.50794	7.21e-07	FALSE	-	FALSE	-	FALSE	-
hsa-miR-342-3p	MIMAT0000753	ACOT6	-0.55391	-3.57209	7.91e-05	2.3406	0.0190592	FALSE	-	FALSE	-	FALSE	-
hsa-miR-149	MIMAT0000450	ACPP	-0.573303	-4.73938	0.000153923	2.291	0.0120225	TRUE	miRanda,Targetscan	FALSE	-	FALSE	-
hsa-miR-320d	MIMAT0006764	ACPP	-0.518754	-4.73938	0.000153923	3.33924	0.000298489	TRUE	miRWalk,Targetscan	FALSE	-	FALSE	-
hsa-miR-130b	MIMAT0000691	ACPP	-0.560824	-4.73938	0.000153923	3.80083	0.00520967	TRUE	Targetscan	FALSE	-	FALSE	-
hsa-miR-483-3p	MIMAT0002173	ACPP	-0.570787	-4.73938	0.000153923	8.10918	0.0126338	TRUE	miRanda	FALSE	-	FALSE	-
hsa-miR-342-3p	MIMAT0000753	ACPP	-0.724896	-4.73938	0.000153923	2.3406	0.0190592	FALSE	-	FALSE	-	FALSE	-
hsa-miR-342-3p	MIMAT0000753	ACSBG2	-0.612369	-2.53598	0.0074473	2.3406	0.0190592	FALSE	-	FALSE	-	FALSE	-
hsa-miR-382	MIMAT0000737	ACSF2	-0.590974	-2.34568	3.26e-06	2.51265	0.000951205	FALSE	-	FALSE	-	FALSE	-
hsa-miR-199b-5p	MIMAT0000263	ACSF2	-0.515296	-2.34568	3.26e-06	4.57993	0.00988295	FALSE	-	FALSE	-	FALSE	-
hsa-miR-149	MIMAT0000450	ACSL1	-0.637123	-2.66247	0.012963	2.291	0.0120225	TRUE	Targetscan	FALSE	-	FALSE	-
hsa-miR-342-3p	MIMAT0000753	ACSL1	-0.588073	-2.66247	0.012963	2.3406	0.0190592	TRUE	miRanda,miRWalk,Targetscan	FALSE	-	FALSE	-
hsa-miR-130b	MIMAT0000691	ACSL1	-0.620792	-2.66247	0.012963	3.80083	0.00520967	TRUE	miRanda,miRWalk,Targetscan	FALSE	-	TRUE	TargetScan,PicTar,PITA,miRanda
hsa-miR-483-3p	MIMAT0002173	ACSL1	-0.562396	-2.66247	0.012963	8.10918	0.0126338	FALSE	-	FALSE	-	FALSE	-
hsa-miR-342-3p	MIMAT0000753	ACSM2B	-0.649158	-9.63077	3.72e-14	2.3406	0.0190592	FALSE	-	FALSE	-	FALSE	-
hsa-miR-130b	MIMAT0000691	ACSM2B	-0.532969	-9.63077	3.72e-14	3.80083	0.00520967	FALSE	-	FALSE	-	FALSE	-
hsa-miR-483-3p	MIMAT0002173	ACSM2B	-0.596836	-9.63077	3.72e-14	8.10918	0.0126338	FALSE	-	FALSE	-	FALSE	-
hsa-miR-485-3p	MIMAT0002176	ACSM3	-0.515056	-2.96467	0.000641102	2.02334	0.0209151	FALSE	-	FALSE	-	FALSE	-
hsa-miR-1825	MIMAT0006765	ACSM3	-0.501191	-2.96467	0.000641102	2.0258	0.0190592	FALSE	-	FALSE	-	FALSE	-
hsa-miR-3148	MIMAT0015021	ACSM3	-0.60515	-2.96467	0.000641102	2.16406	8.93e-05	FALSE	-	FALSE	-	FALSE	-
hsa-miR-1281	MIMAT0005939	ACSM3	-0.546162	-2.96467	0.000641102	2.16453	0.00789577	FALSE	-	FALSE	-	FALSE	-
hsa-miR-4290	MIMAT0016921	ACSM3	-0.555484	-2.96467	0.000641102	2.16527	0.00455468	FALSE	-	FALSE	-	FALSE	-
hsa-miR-3149	MIMAT0015022	ACSM3	-0.581892	-2.96467	0.000641102	2.31002	0.00144797	FALSE	-	FALSE	-	FALSE	-
hsa-miR-382	MIMAT0000737	ACSM3	-0.628596	-2.96467	0.000641102	2.51265	0.000951205	FALSE	-	FALSE	-	FALSE	-
hsa-miR-595	MIMAT0003263	ACSM3	-0.588687	-2.96467	0.000641102	2.56618	0.000369323	FALSE	-	FALSE	-	FALSE	-
hsa-miR-34a	MIMAT0000255	ACSM3	-0.57831	-2.96467	0.000641102	5.47031	0.0483291	FALSE	-	FALSE	-	FALSE	-
hsa-miR-130b	MIMAT0000691	ACSM5	-0.694607	-2.52809	0.000140479	3.80083	0.00520967	TRUE	miRanda,Targetscan	FALSE	-	FALSE	-
hsa-miR-149	MIMAT0000450	ACSM5	-0.736305	-2.52809	0.000140479	2.291	0.0120225	FALSE	-	FALSE	-	FALSE	-
hsa-miR-342-3p	MIMAT0000753	ACSM5	-0.526767	-2.52809	0.000140479	2.3406	0.0190592	FALSE	-	FALSE	-	FALSE	-
hsa-miR-320e	MIMAT0015072	ACSM5	-0.501496	-2.52809	0.000140479	2.96208	0.000298489	FALSE	-	FALSE	-	FALSE	-
hsa-miR-483-3p	MIMAT0002173	ACSM5	-0.677243	-2.52809	0.000140479	8.10918	0.0126338	FALSE	-	FALSE	-	FALSE	-
hsa-miR-149	MIMAT0000450	ACSS1	-0.720223	-2.89138	1.89e-08	2.291	0.0120225	TRUE	miRanda,miRWalk,Targetscan	FALSE	-	FALSE	-
hsa-miR-483-3p	MIMAT0002173	ACSS1	-0.652753	-2.89138	1.89e-08	8.10918	0.0126338	TRUE	miRanda,miRWalk,Targetscan	FALSE	-	FALSE	-
hsa-miR-342-3p	MIMAT0000753	ACSS1	-0.588862	-2.89138	1.89e-08	2.3406	0.0190592	FALSE	-	FALSE	-	FALSE	-
hsa-miR-130b	MIMAT0000691	ACSS1	-0.655305	-2.89138	1.89e-08	3.80083	0.00520967	FALSE	-	FALSE	-	FALSE	-
hsa-miR-29c	MIMAT0000681	ACTA1	-0.50021	2.89156	0.027073	-6.41599	7.63e-10	FALSE	-	FALSE	-	FALSE	-
hsa-miR-342-3p	MIMAT0000753	ACTR3C	-0.577041	-2.4471	0.00022451	2.3406	0.0190592	FALSE	-	FALSE	-	FALSE	-
hsa-miR-130b	MIMAT0000691	ACTR3C	-0.532584	-2.4471	0.00022451	3.80083	0.00520967	FALSE	-	FALSE	-	FALSE	-
hsa-miR-483-3p	MIMAT0002173	ACTR3C	-0.592863	-2.4471	0.00022451	8.10918	0.0126338	FALSE	-	FALSE	-	FALSE	-
hsa-miR-34b*	MIMAT0000685	ACY1	-0.548983	-3.79805	0.00013655	2.25678	0.0363362	FALSE	-	FALSE	-	FALSE	-
hsa-miR-342-3p	MIMAT0000753	ACY1	-0.521521	-3.79805	0.00013655	2.3406	0.0190592	FALSE	-	FALSE	-	FALSE	-
hsa-miR-382	MIMAT0000737	ACY1	-0.565783	-3.79805	0.00013655	2.51265	0.000951205	FALSE	-	FALSE	-	FALSE	-
hsa-miR-199b-5p	MIMAT0000263	ACY1	-0.655117	-3.79805	0.00013655	4.57993	0.00988295	FALSE	-	FALSE	-	FALSE	-
hsa-miR-34a	MIMAT0000255	ACY1	-0.650161	-3.79805	0.00013655	5.47031	0.0483291	FALSE	-	FALSE	-	FALSE	-
hsa-miR-149	MIMAT0000450	ACY3	-0.544449	-6.28085	1.88e-06	2.291	0.0120225	FALSE	-	FALSE	-	FALSE	-
hsa-miR-342-3p	MIMAT0000753	ACY3	-0.64539	-6.28085	1.88e-06	2.3406	0.0190592	FALSE	-	FALSE	-	FALSE	-
hsa-miR-483-3p	MIMAT0002173	ACY3	-0.544626	-6.28085	1.88e-06	8.10918	0.0126338	FALSE	-	FALSE	-	FALSE	-
hsa-miR-30a*	MIMAT0000088	ADA	-0.626238	2.38981	0.0175963	-18.8146	0.00022834	TRUE	miRanda,miRWalk	FALSE	-	FALSE	-
hsa-miR-29c	MIMAT0000681	ADA	-0.577638	2.38981	0.0175963	-6.41599	7.63e-10	TRUE	miRanda,miRWalk,Targetscan	FALSE	-	TRUE	TargetScan,miRanda
hsa-miR-30e*	MIMAT0000693	ADA	-0.586454	2.38981	0.0175963	-6.40949	2.86e-08	TRUE	miRanda,miRWalk	FALSE	-	FALSE	-
hsa-miR-194	MIMAT0000460	ADA	-0.715186	2.38981	0.0175963	-46.2178	9.52e-10	FALSE	-	FALSE	-	FALSE	-
hsa-miR-204	MIMAT0000265	ADA	-0.677718	2.38981	0.0175963	-36.81	0.00154679	FALSE	-	FALSE	-	FALSE	-
hsa-miR-192	MIMAT0000222	ADA	-0.701397	2.38981	0.0175963	-28.5527	0.00455468	FALSE	-	FALSE	-	FALSE	-
hsa-miR-30a	MIMAT0000087	ADA	-0.610259	2.38981	0.0175963	-16.9463	7.4e-12	FALSE	-	FALSE	-	FALSE	-
hsa-miR-514	MIMAT0002883	ADA	-0.662258	2.38981	0.0175963	-9.56105	0.0315166	FALSE	-	FALSE	-	FALSE	-
hsa-miR-30c-2*	MIMAT0004550	ADA	-0.626331	2.38981	0.0175963	-7.05949	0.000128821	FALSE	-	FALSE	-	FALSE	-
hsa-miR-30c	MIMAT0000244	ADA	-0.609268	2.38981	0.0175963	-7.00515	8.66e-09	FALSE	-	FALSE	-	FALSE	-
hsa-miR-532-3p	MIMAT0004780	ADA	-0.577211	2.38981	0.0175963	-5.3682	0.00494485	FALSE	-	FALSE	-	FALSE	-
hsa-miR-30b	MIMAT0000420	ADA	-0.524122	2.38981	0.0175963	-5.18561	2.83e-06	FALSE	-	FALSE	-	FALSE	-
hsa-miR-532-5p	MIMAT0002888	ADA	-0.578928	2.38981	0.0175963	-4.15879	0.000754552	FALSE	-	FALSE	-	FALSE	-
hsa-miR-30d	MIMAT0000245	ADA	-0.594052	2.38981	0.0175963	-4.08877	0.0040731	FALSE	-	FALSE	-	FALSE	-
hsa-miR-30e	MIMAT0000692	ADA	-0.584792	2.38981	0.0175963	-3.67906	0.000527046	FALSE	-	FALSE	-	FALSE	-
hsa-miR-192*	MIMAT0004543	ADA	-0.623876	2.38981	0.0175963	-2.59251	0.0496439	FALSE	-	FALSE	-	FALSE	-
hsa-miR-29c*	MIMAT0004673	ADA	-0.661169	2.38981	0.0175963	-2.48117	0.0315166	FALSE	-	FALSE	-	FALSE	-
hsa-miR-4254	MIMAT0016884	ADA	-0.580823	2.38981	0.0175963	-2.23216	0.044083	FALSE	-	FALSE	-	FALSE	-
hsa-miR-23b	MIMAT0000418	ADA	-0.530647	2.38981	0.0175963	-2.22707	0.000137514	FALSE	-	FALSE	-	FALSE	-
hsa-miR-200a	MIMAT0000682	ADAM19	-0.621188	2.20681	0.000197062	-46.4655	2.79e-13	TRUE	miRanda,Targetscan	FALSE	-	FALSE	-
hsa-miR-204	MIMAT0000265	ADAM19	-0.650945	2.20681	0.000197062	-36.81	0.00154679	TRUE	miRanda,miRWalk,Targetscan	FALSE	-	FALSE	-
hsa-miR-200b	MIMAT0000318	ADAM19	-0.558486	2.20681	0.000197062	-35.3775	3.1e-06	TRUE	miRanda	FALSE	-	FALSE	-
hsa-miR-141	MIMAT0000432	ADAM19	-0.529542	2.20681	0.000197062	-31.9336	0.000951205	TRUE	miRanda,Targetscan	FALSE	-	FALSE	-
hsa-miR-192	MIMAT0000222	ADAM19	-0.760505	2.20681	0.000197062	-28.5527	0.00455468	TRUE	Targetscan	FALSE	-	FALSE	-
hsa-miR-429	MIMAT0001536	ADAM19	-0.675475	2.20681	0.000197062	-28.4646	9.52e-10	TRUE	miRanda	FALSE	-	FALSE	-
hsa-miR-200c	MIMAT0000617	ADAM19	-0.568783	2.20681	0.000197062	-21.4575	7.21e-07	TRUE	miRanda	FALSE	-	FALSE	-
hsa-miR-30a*	MIMAT0000088	ADAM19	-0.67496	2.20681	0.000197062	-18.8146	0.00022834	TRUE	miRanda	FALSE	-	FALSE	-
hsa-miR-30a	MIMAT0000087	ADAM19	-0.64812	2.20681	0.000197062	-16.9463	7.4e-12	TRUE	miRanda,miRDB,miRWalk,Targetscan	FALSE	-	TRUE	TargetScan,PicTar,PITA,miRanda
hsa-miR-514	MIMAT0002883	ADAM19	-0.650401	2.20681	0.000197062	-9.56105	0.0315166	TRUE	miRanda,miRWalk,Targetscan	FALSE	-	FALSE	-
hsa-miR-30c-2*	MIMAT0004550	ADAM19	-0.786191	2.20681	0.000197062	-7.05949	0.000128821	TRUE	miRanda	FALSE	-	FALSE	-
hsa-miR-30c	MIMAT0000244	ADAM19	-0.721828	2.20681	0.000197062	-7.00515	8.66e-09	TRUE	miRanda,miRDB,miRWalk,Targetscan	FALSE	-	TRUE	TargetScan,PicTar,PITA,miRanda
hsa-miR-30e*	MIMAT0000693	ADAM19	-0.72711	2.20681	0.000197062	-6.40949	2.86e-08	TRUE	miRanda	FALSE	-	FALSE	-
hsa-miR-532-3p	MIMAT0004780	ADAM19	-0.623311	2.20681	0.000197062	-5.3682	0.00494485	TRUE	miRanda,Targetscan	FALSE	-	FALSE	-
hsa-miR-30b	MIMAT0000420	ADAM19	-0.699171	2.20681	0.000197062	-5.18561	2.83e-06	TRUE	miRanda,miRDB,miRWalk,Targetscan	FALSE	-	TRUE	TargetScan,PITA,miRanda
hsa-miR-30d	MIMAT0000245	ADAM19	-0.63183	2.20681	0.000197062	-4.08877	0.0040731	TRUE	miRanda,miRDB,miRWalk,Targetscan	FALSE	-	TRUE	TargetScan,PicTar,PITA,miRanda
hsa-miR-184	MIMAT0000454	ADAM19	-0.544407	2.20681	0.000197062	-3.77856	0.0471754	TRUE	miRanda,miRWalk,Targetscan	FALSE	-	FALSE	-
hsa-miR-30e	MIMAT0000692	ADAM19	-0.643632	2.20681	0.000197062	-3.67906	0.000527046	TRUE	miRanda,miRDB,miRWalk,Targetscan	FALSE	-	TRUE	TargetScan,PITA,miRanda
hsa-miR-509-3-5p	MIMAT0004975	ADAM19	-0.523483	2.20681	0.000197062	-2.88187	0.0368071	TRUE	miRanda,Targetscan	FALSE	-	FALSE	-
hsa-miR-509-5p	MIMAT0004779	ADAM19	-0.587588	2.20681	0.000197062	-2.87305	0.0406154	TRUE	miRanda,Targetscan	FALSE	-	FALSE	-
hsa-miR-23b	MIMAT0000418	ADAM19	-0.527449	2.20681	0.000197062	-2.22707	0.000137514	TRUE	miRanda,miRDB,miRWalk,Targetscan	FALSE	-	FALSE	-
hsa-miR-665	MIMAT0004952	ADAM19	-0.598732	2.20681	0.000197062	-2.17957	0.0468347	TRUE	miRanda,miRWalk,Targetscan	FALSE	-	FALSE	-
hsa-miR-194	MIMAT0000460	ADAM19	-0.791933	2.20681	0.000197062	-46.2178	9.52e-10	FALSE	-	FALSE	-	FALSE	-
hsa-miR-1973	MIMAT0009448	ADAM19	-0.513667	2.20681	0.000197062	-22.3522	0.00154679	FALSE	-	FALSE	-	FALSE	-
hsa-miR-138	MIMAT0000430	ADAM19	-0.556313	2.20681	0.000197062	-6.09319	0.0393204	FALSE	-	FALSE	-	FALSE	-
hsa-miR-532-5p	MIMAT0002888	ADAM19	-0.558456	2.20681	0.000197062	-4.15879	0.000754552	FALSE	-	FALSE	-	FALSE	-
hsa-miR-3174	MIMAT0015051	ADAM19	-0.569587	2.20681	0.000197062	-3.91365	0.0040731	FALSE	-	FALSE	-	FALSE	-
hsa-miR-362-3p	MIMAT0004683	ADAM19	-0.551013	2.20681	0.000197062	-3.80364	0.00120223	FALSE	-	FALSE	-	FALSE	-
hsa-miR-362-5p	MIMAT0000705	ADAM19	-0.531394	2.20681	0.000197062	-3.72617	0.0195059	FALSE	-	FALSE	-	FALSE	-
hsa-miR-3607-5p	MIMAT0017984	ADAM19	-0.524902	2.20681	0.000197062	-3.66125	0.00729408	FALSE	-	FALSE	-	FALSE	-
hsa-miR-200b*	MIMAT0004571	ADAM19	-0.543483	2.20681	0.000197062	-3.1324	0.0190592	FALSE	-	FALSE	-	FALSE	-
hsa-miR-500a*	MIMAT0002871	ADAM19	-0.54197	2.20681	0.000197062	-2.69328	0.0492036	FALSE	-	FALSE	-	FALSE	-
hsa-miR-192*	MIMAT0004543	ADAM19	-0.605978	2.20681	0.000197062	-2.59251	0.0496439	FALSE	-	FALSE	-	FALSE	-
hsa-miR-4280	MIMAT0016911	ADAM19	-0.524976	2.20681	0.000197062	-2.08514	0.00616155	FALSE	-	FALSE	-	FALSE	-
hsa-miR-194	MIMAT0000460	ADAMTS14	-0.662399	3.17934	0.00107433	-46.2178	9.52e-10	TRUE	miRanda	FALSE	-	FALSE	-
hsa-miR-204	MIMAT0000265	ADAMTS14	-0.539906	3.17934	0.00107433	-36.81	0.00154679	TRUE	miRanda,Targetscan	FALSE	-	FALSE	-
hsa-miR-30a	MIMAT0000087	ADAMTS14	-0.510157	3.17934	0.00107433	-16.9463	7.4e-12	TRUE	miRanda,miRWalk,Targetscan	FALSE	-	FALSE	-
hsa-miR-30c-2*	MIMAT0004550	ADAMTS14	-0.612365	3.17934	0.00107433	-7.05949	0.000128821	TRUE	miRanda,miRWalk	FALSE	-	FALSE	-
hsa-miR-30c	MIMAT0000244	ADAMTS14	-0.634793	3.17934	0.00107433	-7.00515	8.66e-09	TRUE	miRanda,miRWalk,Targetscan	FALSE	-	FALSE	-
hsa-miR-138	MIMAT0000430	ADAMTS14	-0.560909	3.17934	0.00107433	-6.09319	0.0393204	TRUE	miRanda,miRWalk,Targetscan	FALSE	-	FALSE	-
hsa-miR-532-3p	MIMAT0004780	ADAMTS14	-0.555536	3.17934	0.00107433	-5.3682	0.00494485	TRUE	miRanda,miRWalk,Targetscan	FALSE	-	FALSE	-
hsa-miR-30b	MIMAT0000420	ADAMTS14	-0.650711	3.17934	0.00107433	-5.18561	2.83e-06	TRUE	miRanda,miRWalk,Targetscan	FALSE	-	FALSE	-
hsa-miR-362-3p	MIMAT0004683	ADAMTS14	-0.55186	3.17934	0.00107433	-3.80364	0.00120223	TRUE	miRanda	FALSE	-	FALSE	-
hsa-miR-192	MIMAT0000222	ADAMTS14	-0.651252	3.17934	0.00107433	-28.5527	0.00455468	FALSE	-	FALSE	-	FALSE	-
hsa-miR-429	MIMAT0001536	ADAMTS14	-0.537215	3.17934	0.00107433	-28.4646	9.52e-10	FALSE	-	FALSE	-	FALSE	-
hsa-miR-30a*	MIMAT0000088	ADAMTS14	-0.576446	3.17934	0.00107433	-18.8146	0.00022834	FALSE	-	FALSE	-	FALSE	-
hsa-miR-514	MIMAT0002883	ADAMTS14	-0.511884	3.17934	0.00107433	-9.56105	0.0315166	FALSE	-	FALSE	-	FALSE	-
hsa-miR-30e*	MIMAT0000693	ADAMTS14	-0.613198	3.17934	0.00107433	-6.40949	2.86e-08	FALSE	-	FALSE	-	FALSE	-
hsa-miR-4284	MIMAT0016915	ADAMTS14	-0.511793	3.17934	0.00107433	-5.84348	0.00234241	FALSE	-	FALSE	-	FALSE	-
hsa-miR-532-5p	MIMAT0002888	ADAMTS14	-0.583813	3.17934	0.00107433	-4.15879	0.000754552	FALSE	-	FALSE	-	FALSE	-
hsa-miR-660	MIMAT0003338	ADAMTS14	-0.606937	3.17934	0.00107433	-3.1577	0.00404992	FALSE	-	FALSE	-	FALSE	-
hsa-miR-192*	MIMAT0004543	ADAMTS14	-0.51108	3.17934	0.00107433	-2.59251	0.0496439	FALSE	-	FALSE	-	FALSE	-
hsa-miR-363	MIMAT0000707	ADAMTS14	-0.560871	3.17934	0.00107433	-2.52828	0.0236749	FALSE	-	FALSE	-	FALSE	-
hsa-miR-23b	MIMAT0000418	ADAMTS14	-0.540377	3.17934	0.00107433	-2.22707	0.000137514	FALSE	-	FALSE	-	FALSE	-
hsa-miR-320e	MIMAT0015072	ADAMTS16	-0.524907	-2.80316	0.000964329	2.96208	0.000298489	FALSE	-	FALSE	-	FALSE	-
hsa-miR-320c	MIMAT0005793	ADAMTS16	-0.571405	-2.80316	0.000964329	3.59274	3.56e-09	FALSE	-	FALSE	-	FALSE	-
hsa-miR-149	MIMAT0000450	ADAMTS9-AS2	-0.54751	-2.38883	1.03e-05	2.291	0.0120225	FALSE	-	FALSE	-	FALSE	-
hsa-miR-342-3p	MIMAT0000753	ADAMTS9-AS2	-0.505797	-2.38883	1.03e-05	2.3406	0.0190592	FALSE	-	FALSE	-	FALSE	-
hsa-miR-130b	MIMAT0000691	ADAMTS9-AS2	-0.703174	-2.38883	1.03e-05	3.80083	0.00520967	FALSE	-	FALSE	-	FALSE	-
hsa-miR-483-3p	MIMAT0002173	ADAMTS9-AS2	-0.724785	-2.38883	1.03e-05	8.10918	0.0126338	FALSE	-	FALSE	-	FALSE	-
hsa-miR-149	MIMAT0000450	ADAP1	-0.625946	-2.094	5.31e-06	2.291	0.0120225	FALSE	-	FALSE	-	FALSE	-
hsa-miR-342-3p	MIMAT0000753	ADAP1	-0.574821	-2.094	5.31e-06	2.3406	0.0190592	FALSE	-	FALSE	-	FALSE	-
hsa-miR-130b	MIMAT0000691	ADAP1	-0.616454	-2.094	5.31e-06	3.80083	0.00520967	FALSE	-	FALSE	-	FALSE	-
hsa-miR-199b-5p	MIMAT0000263	ADAP1	-0.511264	-2.094	5.31e-06	4.57993	0.00988295	FALSE	-	FALSE	-	FALSE	-
hsa-miR-483-3p	MIMAT0002173	ADAP1	-0.573524	-2.094	5.31e-06	8.10918	0.0126338	FALSE	-	FALSE	-	FALSE	-
hsa-miR-194	MIMAT0000460	ADCY7	-0.659811	2.64989	0.00958825	-46.2178	9.52e-10	TRUE	miRanda,miRWalk,Targetscan	FALSE	-	FALSE	-
hsa-miR-192	MIMAT0000222	ADCY7	-0.697034	2.64989	0.00958825	-28.5527	0.00455468	TRUE	miRanda,miRDB,miRWalk,Targetscan	FALSE	-	FALSE	-
hsa-miR-30a*	MIMAT0000088	ADCY7	-0.563497	2.64989	0.00958825	-18.8146	0.00022834	TRUE	miRanda,miRWalk	FALSE	-	FALSE	-
hsa-miR-30c	MIMAT0000244	ADCY7	-0.58808	2.64989	0.00958825	-7.00515	8.66e-09	TRUE	miRanda	FALSE	-	FALSE	-
hsa-miR-30e*	MIMAT0000693	ADCY7	-0.544668	2.64989	0.00958825	-6.40949	2.86e-08	TRUE	miRanda,miRWalk	FALSE	-	FALSE	-
hsa-miR-138	MIMAT0000430	ADCY7	-0.504789	2.64989	0.00958825	-6.09319	0.0393204	TRUE	Targetscan	FALSE	-	FALSE	-
hsa-miR-30b	MIMAT0000420	ADCY7	-0.518674	2.64989	0.00958825	-5.18561	2.83e-06	TRUE	miRanda	FALSE	-	FALSE	-
hsa-miR-204	MIMAT0000265	ADCY7	-0.591	2.64989	0.00958825	-36.81	0.00154679	FALSE	-	FALSE	-	FALSE	-
hsa-miR-514	MIMAT0002883	ADCY7	-0.563842	2.64989	0.00958825	-9.56105	0.0315166	FALSE	-	FALSE	-	FALSE	-
hsa-miR-30c-2*	MIMAT0004550	ADCY7	-0.553901	2.64989	0.00958825	-7.05949	0.000128821	FALSE	-	FALSE	-	FALSE	-
hsa-miR-4284	MIMAT0016915	ADCY7	-0.570441	2.64989	0.00958825	-5.84348	0.00234241	FALSE	-	FALSE	-	FALSE	-
hsa-miR-192*	MIMAT0004543	ADCY7	-0.584705	2.64989	0.00958825	-2.59251	0.0496439	FALSE	-	FALSE	-	FALSE	-
hsa-miR-363	MIMAT0000707	ADCY7	-0.53402	2.64989	0.00958825	-2.52828	0.0236749	FALSE	-	FALSE	-	FALSE	-
hsa-miR-4254	MIMAT0016884	ADCY7	-0.582598	2.64989	0.00958825	-2.23216	0.044083	FALSE	-	FALSE	-	FALSE	-
hsa-miR-149	MIMAT0000450	ADH6	-0.59786	-3.8887	5.34e-08	2.291	0.0120225	FALSE	-	FALSE	-	FALSE	-
hsa-miR-342-3p	MIMAT0000753	ADH6	-0.68681	-3.8887	5.34e-08	2.3406	0.0190592	FALSE	-	FALSE	-	FALSE	-
hsa-miR-320d	MIMAT0006764	ADH6	-0.512259	-3.8887	5.34e-08	3.33924	0.000298489	FALSE	-	FALSE	-	FALSE	-
hsa-miR-320c	MIMAT0005793	ADH6	-0.510539	-3.8887	5.34e-08	3.59274	3.56e-09	FALSE	-	FALSE	-	FALSE	-
hsa-miR-130b	MIMAT0000691	ADH6	-0.605335	-3.8887	5.34e-08	3.80083	0.00520967	FALSE	-	FALSE	-	FALSE	-
hsa-miR-483-3p	MIMAT0002173	ADH6	-0.564881	-3.8887	5.34e-08	8.10918	0.0126338	FALSE	-	FALSE	-	FALSE	-
hsa-miR-149	MIMAT0000450	ADIRF	-0.56671	-3.98997	4.48e-08	2.291	0.0120225	FALSE	-	FALSE	-	FALSE	-
hsa-miR-342-3p	MIMAT0000753	ADIRF	-0.622091	-3.98997	4.48e-08	2.3406	0.0190592	FALSE	-	FALSE	-	FALSE	-
hsa-miR-130b	MIMAT0000691	ADIRF	-0.629028	-3.98997	4.48e-08	3.80083	0.00520967	FALSE	-	FALSE	-	FALSE	-
hsa-miR-483-3p	MIMAT0002173	ADIRF	-0.574582	-3.98997	4.48e-08	8.10918	0.0126338	FALSE	-	FALSE	-	FALSE	-
hsa-miR-149	MIMAT0000450	ADORA2A-AS1	-0.539876	-4.00501	6.83e-06	2.291	0.0120225	FALSE	-	FALSE	-	FALSE	-
hsa-miR-342-3p	MIMAT0000753	ADORA2A-AS1	-0.724413	-4.00501	6.83e-06	2.3406	0.0190592	FALSE	-	FALSE	-	FALSE	-
hsa-miR-320e	MIMAT0015072	ADORA2A-AS1	-0.512228	-4.00501	6.83e-06	2.96208	0.000298489	FALSE	-	FALSE	-	FALSE	-
hsa-miR-320d	MIMAT0006764	ADORA2A-AS1	-0.549143	-4.00501	6.83e-06	3.33924	0.000298489	FALSE	-	FALSE	-	FALSE	-
hsa-miR-130b	MIMAT0000691	ADORA2A-AS1	-0.645995	-4.00501	6.83e-06	3.80083	0.00520967	FALSE	-	FALSE	-	FALSE	-
hsa-miR-483-3p	MIMAT0002173	ADORA2A-AS1	-0.569533	-4.00501	6.83e-06	8.10918	0.0126338	FALSE	-	FALSE	-	FALSE	-
hsa-miR-200a	MIMAT0000682	ADORA2B	-0.609693	3.37274	0.017934	-46.4655	2.79e-13	TRUE	miRanda	FALSE	-	FALSE	-
hsa-miR-204	MIMAT0000265	ADORA2B	-0.721523	3.37274	0.017934	-36.81	0.00154679	TRUE	miRanda	FALSE	-	FALSE	-
hsa-miR-192	MIMAT0000222	ADORA2B	-0.78643	3.37274	0.017934	-28.5527	0.00455468	TRUE	miRanda,miRWalk	FALSE	-	FALSE	-
hsa-miR-30a*	MIMAT0000088	ADORA2B	-0.728137	3.37274	0.017934	-18.8146	0.00022834	TRUE	miRanda,miRWalk	FALSE	-	FALSE	-
hsa-miR-30e*	MIMAT0000693	ADORA2B	-0.785885	3.37274	0.017934	-6.40949	2.86e-08	TRUE	miRanda,miRWalk	FALSE	-	FALSE	-
hsa-miR-138	MIMAT0000430	ADORA2B	-0.536874	3.37274	0.017934	-6.09319	0.0393204	TRUE	miRanda	FALSE	-	FALSE	-
hsa-miR-532-3p	MIMAT0004780	ADORA2B	-0.574617	3.37274	0.017934	-5.3682	0.00494485	TRUE	miRanda,miRWalk,Targetscan	FALSE	-	FALSE	-
hsa-miR-362-5p	MIMAT0000705	ADORA2B	-0.506199	3.37274	0.017934	-3.72617	0.0195059	TRUE	miRanda,miRWalk,Targetscan	FALSE	-	FALSE	-
hsa-miR-424	MIMAT0001341	ADORA2B	-0.564496	3.37274	0.017934	-2.78917	0.0126203	TRUE	miRanda	FALSE	-	FALSE	-
hsa-miR-101	MIMAT0000099	ADORA2B	-0.520178	3.37274	0.017934	-2.52409	0.0022804	TRUE	miRanda	FALSE	-	FALSE	-
hsa-miR-194	MIMAT0000460	ADORA2B	-0.757133	3.37274	0.017934	-46.2178	9.52e-10	FALSE	-	FALSE	-	FALSE	-
hsa-miR-200b	MIMAT0000318	ADORA2B	-0.563768	3.37274	0.017934	-35.3775	3.1e-06	FALSE	-	FALSE	-	FALSE	-
hsa-miR-429	MIMAT0001536	ADORA2B	-0.642546	3.37274	0.017934	-28.4646	9.52e-10	FALSE	-	FALSE	-	FALSE	-
hsa-miR-30a	MIMAT0000087	ADORA2B	-0.665147	3.37274	0.017934	-16.9463	7.4e-12	FALSE	-	FALSE	-	FALSE	-
hsa-miR-514	MIMAT0002883	ADORA2B	-0.581885	3.37274	0.017934	-9.56105	0.0315166	FALSE	-	FALSE	-	FALSE	-
hsa-miR-30c-2*	MIMAT0004550	ADORA2B	-0.744087	3.37274	0.017934	-7.05949	0.000128821	FALSE	-	FALSE	-	FALSE	-
hsa-miR-30c	MIMAT0000244	ADORA2B	-0.783887	3.37274	0.017934	-7.00515	8.66e-09	FALSE	-	FALSE	-	FALSE	-
hsa-miR-30b	MIMAT0000420	ADORA2B	-0.737872	3.37274	0.017934	-5.18561	2.83e-06	FALSE	-	FALSE	-	FALSE	-
hsa-miR-532-5p	MIMAT0002888	ADORA2B	-0.540121	3.37274	0.017934	-4.15879	0.000754552	FALSE	-	FALSE	-	FALSE	-
hsa-miR-30d	MIMAT0000245	ADORA2B	-0.608473	3.37274	0.017934	-4.08877	0.0040731	FALSE	-	FALSE	-	FALSE	-
hsa-miR-3174	MIMAT0015051	ADORA2B	-0.50283	3.37274	0.017934	-3.91365	0.0040731	FALSE	-	FALSE	-	FALSE	-
hsa-miR-362-3p	MIMAT0004683	ADORA2B	-0.588245	3.37274	0.017934	-3.80364	0.00120223	FALSE	-	FALSE	-	FALSE	-
hsa-miR-184	MIMAT0000454	ADORA2B	-0.506155	3.37274	0.017934	-3.77856	0.0471754	FALSE	-	FALSE	-	FALSE	-
hsa-miR-30e	MIMAT0000692	ADORA2B	-0.647662	3.37274	0.017934	-3.67906	0.000527046	FALSE	-	FALSE	-	FALSE	-
hsa-miR-3607-5p	MIMAT0017984	ADORA2B	-0.575247	3.37274	0.017934	-3.66125	0.00729408	FALSE	-	FALSE	-	FALSE	-
hsa-miR-660	MIMAT0003338	ADORA2B	-0.547007	3.37274	0.017934	-3.1577	0.00404992	FALSE	-	FALSE	-	FALSE	-
hsa-miR-200b*	MIMAT0004571	ADORA2B	-0.563023	3.37274	0.017934	-3.1324	0.0190592	FALSE	-	FALSE	-	FALSE	-
hsa-miR-509-3-5p	MIMAT0004975	ADORA2B	-0.530256	3.37274	0.017934	-2.88187	0.0368071	FALSE	-	FALSE	-	FALSE	-
hsa-miR-509-5p	MIMAT0004779	ADORA2B	-0.554792	3.37274	0.017934	-2.87305	0.0406154	FALSE	-	FALSE	-	FALSE	-
hsa-miR-192*	MIMAT0004543	ADORA2B	-0.647125	3.37274	0.017934	-2.59251	0.0496439	FALSE	-	FALSE	-	FALSE	-
hsa-miR-363	MIMAT0000707	ADORA2B	-0.553401	3.37274	0.017934	-2.52828	0.0236749	FALSE	-	FALSE	-	FALSE	-
hsa-miR-29c*	MIMAT0004673	ADORA2B	-0.531006	3.37274	0.017934	-2.48117	0.0315166	FALSE	-	FALSE	-	FALSE	-
hsa-miR-455-5p	MIMAT0003150	ADORA2B	-0.505738	3.37274	0.017934	-2.36193	0.012181	FALSE	-	FALSE	-	FALSE	-
hsa-miR-23b	MIMAT0000418	ADORA2B	-0.624092	3.37274	0.017934	-2.22707	0.000137514	FALSE	-	FALSE	-	FALSE	-
hsa-miR-665	MIMAT0004952	ADORA2B	-0.522919	3.37274	0.017934	-2.17957	0.0468347	FALSE	-	FALSE	-	FALSE	-
hsa-miR-4280	MIMAT0016911	ADORA2B	-0.510049	3.37274	0.017934	-2.08514	0.00616155	FALSE	-	FALSE	-	FALSE	-
hsa-miR-194	MIMAT0000460	ADORA3	-0.571664	2.63246	0.00104858	-46.2178	9.52e-10	FALSE	-	FALSE	-	FALSE	-
hsa-miR-192	MIMAT0000222	ADORA3	-0.552265	2.63246	0.00104858	-28.5527	0.00455468	FALSE	-	FALSE	-	FALSE	-
hsa-miR-30c	MIMAT0000244	ADORA3	-0.569265	2.63246	0.00104858	-7.00515	8.66e-09	FALSE	-	FALSE	-	FALSE	-
hsa-miR-30e*	MIMAT0000693	ADORA3	-0.526792	2.63246	0.00104858	-6.40949	2.86e-08	FALSE	-	FALSE	-	FALSE	-
hsa-miR-4284	MIMAT0016915	ADORA3	-0.679941	2.63246	0.00104858	-5.84348	0.00234241	FALSE	-	FALSE	-	FALSE	-
hsa-miR-30b	MIMAT0000420	ADORA3	-0.623983	2.63246	0.00104858	-5.18561	2.83e-06	FALSE	-	FALSE	-	FALSE	-
hsa-miR-4254	MIMAT0016884	ADORA3	-0.529646	2.63246	0.00104858	-2.23216	0.044083	FALSE	-	FALSE	-	FALSE	-
hsa-miR-149	MIMAT0000450	ADRB1	-0.677388	-3.67451	0.00322391	2.291	0.0120225	TRUE	miRanda,miRWalk,Targetscan	FALSE	-	FALSE	-
hsa-miR-342-3p	MIMAT0000753	ADRB1	-0.62086	-3.67451	0.00322391	2.3406	0.0190592	TRUE	miRanda,miRDB,miRWalk,Targetscan	FALSE	-	TRUE	TargetScan,PITA,miRanda
hsa-miR-130b	MIMAT0000691	ADRB1	-0.612676	-3.67451	0.00322391	3.80083	0.00520967	TRUE	miRanda	FALSE	-	FALSE	-
hsa-miR-483-3p	MIMAT0002173	ADRB1	-0.653827	-3.67451	0.00322391	8.10918	0.0126338	TRUE	miRanda,miRDB,miRWalk,Targetscan	FALSE	-	FALSE	-
hsa-miR-149	MIMAT0000450	ADTRP	-0.585504	-2.10366	0.000461713	2.291	0.0120225	FALSE	-	FALSE	-	FALSE	-
hsa-miR-342-3p	MIMAT0000753	ADTRP	-0.577909	-2.10366	0.000461713	2.3406	0.0190592	FALSE	-	FALSE	-	FALSE	-
hsa-miR-130b	MIMAT0000691	ADTRP	-0.625395	-2.10366	0.000461713	3.80083	0.00520967	FALSE	-	FALSE	-	FALSE	-
hsa-miR-192	MIMAT0000222	AEBP1	-0.553473	2.16525	0.000249973	-28.5527	0.00455468	TRUE	miRanda	FALSE	-	FALSE	-
hsa-miR-509-5p	MIMAT0004779	AEBP1	-0.518848	2.16525	0.000249973	-2.87305	0.0406154	TRUE	miRanda,miRWalk,Targetscan	FALSE	-	FALSE	-
hsa-miR-194	MIMAT0000460	AEBP1	-0.615816	2.16525	0.000249973	-46.2178	9.52e-10	FALSE	-	FALSE	-	FALSE	-
hsa-miR-30c	MIMAT0000244	AEBP1	-0.521911	2.16525	0.000249973	-7.00515	8.66e-09	FALSE	-	FALSE	-	FALSE	-
hsa-miR-138	MIMAT0000430	AEBP1	-0.571993	2.16525	0.000249973	-6.09319	0.0393204	FALSE	-	FALSE	-	FALSE	-
hsa-miR-4284	MIMAT0016915	AEBP1	-0.797245	2.16525	0.000249973	-5.84348	0.00234241	FALSE	-	FALSE	-	FALSE	-
hsa-miR-30b	MIMAT0000420	AEBP1	-0.592586	2.16525	0.000249973	-5.18561	2.83e-06	FALSE	-	FALSE	-	FALSE	-
hsa-miR-3174	MIMAT0015051	AEBP1	-0.516905	2.16525	0.000249973	-3.91365	0.0040731	FALSE	-	FALSE	-	FALSE	-
hsa-miR-184	MIMAT0000454	AEBP1	-0.516478	2.16525	0.000249973	-3.77856	0.0471754	FALSE	-	FALSE	-	FALSE	-
hsa-miR-4286	MIMAT0016916	AEBP1	-0.65477	2.16525	0.000249973	-3.75103	1.22e-07	FALSE	-	FALSE	-	FALSE	-
hsa-miR-29b	MIMAT0000100	AFF2	-0.668841	2.95713	3.93e-06	-6.05381	1.53e-09	TRUE	miRanda,miRWalk,Targetscan	FALSE	-	FALSE	-
hsa-miR-29a	MIMAT0000086	AFF2	-0.519482	2.95713	3.93e-06	-3.59987	1.48e-05	TRUE	miRanda,miRWalk,Targetscan	FALSE	-	FALSE	-
hsa-miR-22	MIMAT0000077	AFF2	-0.553342	2.95713	3.93e-06	-2.15966	0.0040731	TRUE	miRanda,miRWalk,Targetscan	FALSE	-	FALSE	-
hsa-miR-342-3p	MIMAT0000753	AFM	-0.691744	-8.58335	7.34e-09	2.3406	0.0190592	FALSE	-	FALSE	-	FALSE	-
hsa-miR-130b	MIMAT0000691	AFM	-0.544342	-8.58335	7.34e-09	3.80083	0.00520967	FALSE	-	FALSE	-	FALSE	-
hsa-miR-342-3p	MIMAT0000753	AFP	-0.789425	-7.74312	1.17e-05	2.3406	0.0190592	TRUE	miRanda,Targetscan	FALSE	-	FALSE	-
hsa-miR-130b	MIMAT0000691	AFP	-0.539948	-7.74312	1.17e-05	3.80083	0.00520967	FALSE	-	FALSE	-	FALSE	-
hsa-miR-199b-5p	MIMAT0000263	AFP	-0.544622	-7.74312	1.17e-05	4.57993	0.00988295	FALSE	-	FALSE	-	FALSE	-
hsa-miR-149	MIMAT0000450	AGAP1-IT1	-0.52876	-2.50213	0.000565616	2.291	0.0120225	FALSE	-	FALSE	-	FALSE	-
hsa-miR-342-3p	MIMAT0000753	AGAP1-IT1	-0.551591	-2.50213	0.000565616	2.3406	0.0190592	FALSE	-	FALSE	-	FALSE	-
hsa-miR-483-3p	MIMAT0002173	AGAP1-IT1	-0.595059	-2.50213	0.000565616	8.10918	0.0126338	FALSE	-	FALSE	-	FALSE	-
hsa-miR-342-3p	MIMAT0000753	AGMAT	-0.621645	-7.08671	2.33e-09	2.3406	0.0190592	FALSE	-	FALSE	-	FALSE	-
hsa-miR-320d	MIMAT0006764	AGMAT	-0.525524	-7.08671	2.33e-09	3.33924	0.000298489	FALSE	-	FALSE	-	FALSE	-
hsa-miR-199b-5p	MIMAT0000263	AGMAT	-0.588976	-7.08671	2.33e-09	4.57993	0.00988295	FALSE	-	FALSE	-	FALSE	-
hsa-miR-34a	MIMAT0000255	AGMAT	-0.581947	-7.08671	2.33e-09	5.47031	0.0483291	FALSE	-	FALSE	-	FALSE	-
hsa-miR-149	MIMAT0000450	AGPAT9	-0.503437	-4.6801	6.25e-10	2.291	0.0120225	FALSE	-	FALSE	-	FALSE	-
hsa-miR-342-3p	MIMAT0000753	AGPAT9	-0.660107	-4.6801	6.25e-10	2.3406	0.0190592	FALSE	-	FALSE	-	FALSE	-
hsa-miR-320d	MIMAT0006764	AGPAT9	-0.511581	-4.6801	6.25e-10	3.33924	0.000298489	FALSE	-	FALSE	-	FALSE	-
hsa-miR-130b	MIMAT0000691	AGPAT9	-0.603562	-4.6801	6.25e-10	3.80083	0.00520967	FALSE	-	FALSE	-	FALSE	-
hsa-miR-199b-5p	MIMAT0000263	AGPAT9	-0.508722	-4.6801	6.25e-10	4.57993	0.00988295	FALSE	-	FALSE	-	FALSE	-
hsa-miR-483-3p	MIMAT0002173	AGPAT9	-0.525428	-4.6801	6.25e-10	8.10918	0.0126338	FALSE	-	FALSE	-	FALSE	-
hsa-miR-483-3p	MIMAT0002173	AGT	-0.635595	-4.26338	0.000890929	8.10918	0.0126338	TRUE	miRanda,miRWalk,Targetscan	FALSE	-	FALSE	-
hsa-miR-149	MIMAT0000450	AGT	-0.554833	-4.26338	0.000890929	2.291	0.0120225	FALSE	-	FALSE	-	FALSE	-
hsa-miR-130b	MIMAT0000691	AGT	-0.577407	-4.26338	0.000890929	3.80083	0.00520967	FALSE	-	FALSE	-	FALSE	-
hsa-miR-483-3p	MIMAT0002173	AGTR1	-0.553532	-2.36597	0.00701988	8.10918	0.0126338	FALSE	-	FALSE	-	FALSE	-
hsa-miR-149	MIMAT0000450	AGXT	-0.503623	-2.90343	0.0340686	2.291	0.0120225	FALSE	-	FALSE	-	FALSE	-
hsa-miR-342-3p	MIMAT0000753	AGXT	-0.668711	-2.90343	0.0340686	2.3406	0.0190592	FALSE	-	FALSE	-	FALSE	-
hsa-miR-320e	MIMAT0015072	AGXT	-0.522772	-2.90343	0.0340686	2.96208	0.000298489	FALSE	-	FALSE	-	FALSE	-
hsa-miR-320d	MIMAT0006764	AGXT	-0.555604	-2.90343	0.0340686	3.33924	0.000298489	FALSE	-	FALSE	-	FALSE	-
hsa-miR-130b	MIMAT0000691	AGXT	-0.50773	-2.90343	0.0340686	3.80083	0.00520967	FALSE	-	FALSE	-	FALSE	-
hsa-miR-130b	MIMAT0000691	AGXT2	-0.56377	-8.4341	3.08e-16	3.80083	0.00520967	TRUE	RNA22	FALSE	-	FALSE	-
hsa-miR-149	MIMAT0000450	AGXT2	-0.522194	-8.4341	3.08e-16	2.291	0.0120225	FALSE	-	FALSE	-	FALSE	-
hsa-miR-342-3p	MIMAT0000753	AGXT2	-0.694705	-8.4341	3.08e-16	2.3406	0.0190592	FALSE	-	FALSE	-	FALSE	-
hsa-miR-320e	MIMAT0015072	AGXT2	-0.513838	-8.4341	3.08e-16	2.96208	0.000298489	FALSE	-	FALSE	-	FALSE	-
hsa-miR-320d	MIMAT0006764	AGXT2	-0.548777	-8.4341	3.08e-16	3.33924	0.000298489	FALSE	-	FALSE	-	FALSE	-
hsa-miR-483-3p	MIMAT0002173	AGXT2	-0.549476	-8.4341	3.08e-16	8.10918	0.0126338	FALSE	-	FALSE	-	FALSE	-
hsa-miR-3148	MIMAT0015021	AIF1L	-0.505627	-2.77508	0.00264407	2.16406	8.93e-05	FALSE	-	FALSE	-	FALSE	-
hsa-miR-382	MIMAT0000737	AIF1L	-0.602313	-2.77508	0.00264407	2.51265	0.000951205	FALSE	-	FALSE	-	FALSE	-
hsa-miR-595	MIMAT0003263	AIF1L	-0.500754	-2.77508	0.00264407	2.56618	0.000369323	FALSE	-	FALSE	-	FALSE	-
hsa-miR-320e	MIMAT0015072	AIF1L	-0.527073	-2.77508	0.00264407	2.96208	0.000298489	FALSE	-	FALSE	-	FALSE	-
hsa-miR-4270	MIMAT0016900	AIF1L	-0.571524	-2.77508	0.00264407	3.25387	7.35e-05	FALSE	-	FALSE	-	FALSE	-
hsa-miR-320d	MIMAT0006764	AIF1L	-0.569093	-2.77508	0.00264407	3.33924	0.000298489	FALSE	-	FALSE	-	FALSE	-
hsa-miR-1225-5p	MIMAT0005572	AIF1L	-0.542807	-2.77508	0.00264407	3.50426	9.16e-06	FALSE	-	FALSE	-	FALSE	-
hsa-miR-320c	MIMAT0005793	AIF1L	-0.524825	-2.77508	0.00264407	3.59274	3.56e-09	FALSE	-	FALSE	-	FALSE	-
hsa-miR-34a	MIMAT0000255	AIF1L	-0.651885	-2.77508	0.00264407	5.47031	0.0483291	FALSE	-	FALSE	-	FALSE	-
hsa-miR-149	MIMAT0000450	AIM1	-0.684118	-2.48298	0.00367048	2.291	0.0120225	TRUE	Targetscan	FALSE	-	FALSE	-
hsa-miR-483-3p	MIMAT0002173	AIM1	-0.602157	-2.48298	0.00367048	8.10918	0.0126338	TRUE	miRanda	FALSE	-	FALSE	-
hsa-miR-130b	MIMAT0000691	AIM1	-0.616495	-2.48298	0.00367048	3.80083	0.00520967	FALSE	-	FALSE	-	FALSE	-
hsa-miR-342-3p	MIMAT0000753	AK4	-0.638051	-4.02702	6.99e-11	2.3406	0.0190592	FALSE	-	FALSE	-	FALSE	-
hsa-miR-130b	MIMAT0000691	AK4	-0.507156	-4.02702	6.99e-11	3.80083	0.00520967	FALSE	-	FALSE	-	FALSE	-
hsa-miR-199b-5p	MIMAT0000263	AK4	-0.559072	-4.02702	6.99e-11	4.57993	0.00988295	FALSE	-	FALSE	-	FALSE	-
hsa-miR-34b*	MIMAT0000685	AKR7A3	-0.685872	-2.06778	0.00134925	2.25678	0.0363362	TRUE	miRanda,miRWalk	FALSE	-	FALSE	-
hsa-miR-34a	MIMAT0000255	AKR7A3	-0.748812	-2.06778	0.00134925	5.47031	0.0483291	TRUE	miRanda	FALSE	-	FALSE	-
hsa-miR-382	MIMAT0000737	AKR7A3	-0.621116	-2.06778	0.00134925	2.51265	0.000951205	FALSE	-	FALSE	-	FALSE	-
hsa-miR-4270	MIMAT0016900	AKR7A3	-0.508162	-2.06778	0.00134925	3.25387	7.35e-05	FALSE	-	FALSE	-	FALSE	-
hsa-miR-1207-5p	MIMAT0005871	AKR7A3	-0.505012	-2.06778	0.00134925	5.1752	0.00144797	FALSE	-	FALSE	-	FALSE	-
hsa-miR-3148	MIMAT0015021	AKR7L	-0.561111	-2.85535	1.36e-05	2.16406	8.93e-05	FALSE	-	FALSE	-	FALSE	-
hsa-miR-34b*	MIMAT0000685	AKR7L	-0.551184	-2.85535	1.36e-05	2.25678	0.0363362	FALSE	-	FALSE	-	FALSE	-
hsa-miR-3149	MIMAT0015022	AKR7L	-0.52197	-2.85535	1.36e-05	2.31002	0.00144797	FALSE	-	FALSE	-	FALSE	-
hsa-miR-382	MIMAT0000737	AKR7L	-0.568638	-2.85535	1.36e-05	2.51265	0.000951205	FALSE	-	FALSE	-	FALSE	-
hsa-miR-595	MIMAT0003263	AKR7L	-0.558921	-2.85535	1.36e-05	2.56618	0.000369323	FALSE	-	FALSE	-	FALSE	-
hsa-miR-4270	MIMAT0016900	AKR7L	-0.514943	-2.85535	1.36e-05	3.25387	7.35e-05	FALSE	-	FALSE	-	FALSE	-
hsa-miR-1225-5p	MIMAT0005572	AKR7L	-0.528554	-2.85535	1.36e-05	3.50426	9.16e-06	FALSE	-	FALSE	-	FALSE	-
hsa-miR-320c	MIMAT0005793	AKR7L	-0.50723	-2.85535	1.36e-05	3.59274	3.56e-09	FALSE	-	FALSE	-	FALSE	-
hsa-miR-149	MIMAT0000450	ALDH1A1	-0.78386	-2.55004	0.000357286	2.291	0.0120225	FALSE	-	FALSE	-	FALSE	-
hsa-miR-342-3p	MIMAT0000753	ALDH1A1	-0.502128	-2.55004	0.000357286	2.3406	0.0190592	FALSE	-	FALSE	-	FALSE	-
hsa-miR-130b	MIMAT0000691	ALDH1A1	-0.687562	-2.55004	0.000357286	3.80083	0.00520967	FALSE	-	FALSE	-	FALSE	-
hsa-miR-483-3p	MIMAT0002173	ALDH1A1	-0.690693	-2.55004	0.000357286	8.10918	0.0126338	FALSE	-	FALSE	-	FALSE	-
hsa-miR-342-3p	MIMAT0000753	ALDH1L1	-0.540061	-6.70496	4.57e-14	2.3406	0.0190592	TRUE	miRanda,Targetscan	FALSE	-	FALSE	-
hsa-miR-130b	MIMAT0000691	ALDH1L1	-0.50661	-6.70496	4.57e-14	3.80083	0.00520967	FALSE	-	FALSE	-	FALSE	-
hsa-miR-199b-5p	MIMAT0000263	ALDH1L1	-0.561299	-6.70496	4.57e-14	4.57993	0.00988295	FALSE	-	FALSE	-	FALSE	-
hsa-miR-483-3p	MIMAT0002173	ALDH1L1	-0.547552	-6.70496	4.57e-14	8.10918	0.0126338	FALSE	-	FALSE	-	FALSE	-
hsa-miR-34b*	MIMAT0000685	ALDH4A1	-0.526552	-3.60374	0.00070748	2.25678	0.0363362	TRUE	miRanda	FALSE	-	FALSE	-
hsa-miR-342-3p	MIMAT0000753	ALDH4A1	-0.530901	-3.60374	0.00070748	2.3406	0.0190592	TRUE	miRanda	FALSE	-	FALSE	-
hsa-miR-199b-5p	MIMAT0000263	ALDH4A1	-0.587955	-3.60374	0.00070748	4.57993	0.00988295	TRUE	miRanda,miRWalk	FALSE	-	FALSE	-
hsa-miR-34a	MIMAT0000255	ALDH4A1	-0.59031	-3.60374	0.00070748	5.47031	0.0483291	FALSE	-	FALSE	-	FALSE	-
hsa-miR-34b*	MIMAT0000685	ALDH6A1	-0.505987	-3.72755	3.16e-10	2.25678	0.0363362	TRUE	miRanda	FALSE	-	FALSE	-
hsa-miR-34a	MIMAT0000255	ALDH6A1	-0.611162	-3.72755	3.16e-10	5.47031	0.0483291	TRUE	miRanda	FALSE	-	FALSE	-
hsa-miR-149	MIMAT0000450	ALDH8A1	-0.663036	-5.43231	1.07e-10	2.291	0.0120225	TRUE	miRanda	FALSE	-	FALSE	-
hsa-miR-342-3p	MIMAT0000753	ALDH8A1	-0.722679	-5.43231	1.07e-10	2.3406	0.0190592	FALSE	-	FALSE	-	FALSE	-
hsa-miR-320e	MIMAT0015072	ALDH8A1	-0.541351	-5.43231	1.07e-10	2.96208	0.000298489	FALSE	-	FALSE	-	FALSE	-
hsa-miR-320d	MIMAT0006764	ALDH8A1	-0.561182	-5.43231	1.07e-10	3.33924	0.000298489	FALSE	-	FALSE	-	FALSE	-
hsa-miR-130b	MIMAT0000691	ALDH8A1	-0.706237	-5.43231	1.07e-10	3.80083	0.00520967	FALSE	-	FALSE	-	FALSE	-
hsa-miR-483-3p	MIMAT0002173	ALDH8A1	-0.637954	-5.43231	1.07e-10	8.10918	0.0126338	FALSE	-	FALSE	-	FALSE	-
hsa-miR-342-3p	MIMAT0000753	ALDOB	-0.643164	-11.9661	6.7e-15	2.3406	0.0190592	FALSE	-	FALSE	-	FALSE	-
hsa-miR-130b	MIMAT0000691	ALDOB	-0.533619	-11.9661	6.7e-15	3.80083	0.00520967	FALSE	-	FALSE	-	FALSE	-
hsa-miR-199b-5p	MIMAT0000263	ALDOB	-0.601059	-11.9661	6.7e-15	4.57993	0.00988295	FALSE	-	FALSE	-	FALSE	-
hsa-miR-194	MIMAT0000460	ALK	-0.548512	2.66776	0.000319104	-46.2178	9.52e-10	FALSE	-	FALSE	-	FALSE	-
hsa-miR-204	MIMAT0000265	ALK	-0.618141	2.66776	0.000319104	-36.81	0.00154679	FALSE	-	FALSE	-	FALSE	-
hsa-miR-192	MIMAT0000222	ALK	-0.602931	2.66776	0.000319104	-28.5527	0.00455468	FALSE	-	FALSE	-	FALSE	-
hsa-miR-30a*	MIMAT0000088	ALK	-0.563256	2.66776	0.000319104	-18.8146	0.00022834	FALSE	-	FALSE	-	FALSE	-
hsa-miR-30a	MIMAT0000087	ALK	-0.543146	2.66776	0.000319104	-16.9463	7.4e-12	FALSE	-	FALSE	-	FALSE	-
hsa-miR-30c-2*	MIMAT0004550	ALK	-0.540786	2.66776	0.000319104	-7.05949	0.000128821	FALSE	-	FALSE	-	FALSE	-
hsa-miR-30c	MIMAT0000244	ALK	-0.607683	2.66776	0.000319104	-7.00515	8.66e-09	FALSE	-	FALSE	-	FALSE	-
hsa-miR-30e*	MIMAT0000693	ALK	-0.584127	2.66776	0.000319104	-6.40949	2.86e-08	FALSE	-	FALSE	-	FALSE	-
hsa-miR-30d	MIMAT0000245	ALK	-0.601993	2.66776	0.000319104	-4.08877	0.0040731	FALSE	-	FALSE	-	FALSE	-
hsa-miR-30e	MIMAT0000692	ALK	-0.523148	2.66776	0.000319104	-3.67906	0.000527046	FALSE	-	FALSE	-	FALSE	-
hsa-miR-665	MIMAT0004952	ALK	-0.508643	2.66776	0.000319104	-2.17957	0.0468347	FALSE	-	FALSE	-	FALSE	-
hsa-miR-149	MIMAT0000450	ALPK2	-0.626417	-2.44578	0.038104	2.291	0.0120225	TRUE	miRanda	FALSE	-	FALSE	-
hsa-miR-342-3p	MIMAT0000753	ALPK2	-0.554253	-2.44578	0.038104	2.3406	0.0190592	FALSE	-	FALSE	-	FALSE	-
hsa-miR-342-3p	MIMAT0000753	ALPL	-0.607393	-2.59155	0.0208699	2.3406	0.0190592	FALSE	-	FALSE	-	FALSE	-
hsa-miR-149	MIMAT0000450	ALS2CL	-0.541346	-2.45253	0.00628048	2.291	0.0120225	TRUE	miRanda	FALSE	-	FALSE	-
hsa-miR-342-3p	MIMAT0000753	ALS2CL	-0.674509	-2.45253	0.00628048	2.3406	0.0190592	TRUE	miRanda	FALSE	-	FALSE	-
hsa-miR-320d	MIMAT0006764	ALS2CL	-0.513012	-2.45253	0.00628048	3.33924	0.000298489	TRUE	miRanda,miRWalk,Targetscan	FALSE	-	FALSE	-
hsa-miR-483-3p	MIMAT0002173	ALS2CL	-0.642319	-2.45253	0.00628048	8.10918	0.0126338	TRUE	miRanda,miRWalk,Targetscan	FALSE	-	FALSE	-
hsa-miR-130b	MIMAT0000691	ALS2CL	-0.62068	-2.45253	0.00628048	3.80083	0.00520967	FALSE	-	FALSE	-	FALSE	-
hsa-miR-320c	MIMAT0005793	AMACR	-0.543729	-2.12921	0.00013655	3.59274	3.56e-09	TRUE	miRanda,miRWalk,Targetscan	FALSE	-	FALSE	-
hsa-miR-483-3p	MIMAT0002173	AMACR	-0.505738	-2.12921	0.00013655	8.10918	0.0126338	FALSE	-	FALSE	-	FALSE	-
hsa-miR-342-3p	MIMAT0000753	AMBP	-0.674063	-5.46301	0.00115802	2.3406	0.0190592	FALSE	-	FALSE	-	FALSE	-
hsa-miR-130b	MIMAT0000691	AMBP	-0.508992	-5.46301	0.00115802	3.80083	0.00520967	FALSE	-	FALSE	-	FALSE	-
hsa-miR-149	MIMAT0000450	AMDHD1	-0.604768	-3.83461	5.89e-08	2.291	0.0120225	FALSE	-	FALSE	-	FALSE	-
hsa-miR-342-3p	MIMAT0000753	AMDHD1	-0.52962	-3.83461	5.89e-08	2.3406	0.0190592	FALSE	-	FALSE	-	FALSE	-
hsa-miR-130b	MIMAT0000691	AMDHD1	-0.55682	-3.83461	5.89e-08	3.80083	0.00520967	FALSE	-	FALSE	-	FALSE	-
hsa-miR-483-3p	MIMAT0002173	AMDHD1	-0.617404	-3.83461	5.89e-08	8.10918	0.0126338	FALSE	-	FALSE	-	FALSE	-
hsa-miR-514	MIMAT0002883	AMH	-0.525778	2.46289	0.00100256	-9.56105	0.0315166	FALSE	-	FALSE	-	FALSE	-
hsa-miR-29b	MIMAT0000100	AMH	-0.533916	2.46289	0.00100256	-6.05381	1.53e-09	FALSE	-	FALSE	-	FALSE	-
hsa-miR-514	MIMAT0002883	ANGPT2	-0.504721	2.0477	0.029408	-9.56105	0.0315166	TRUE	miRanda,miRWalk,Targetscan	FALSE	-	FALSE	-
hsa-miR-138	MIMAT0000430	ANGPT2	-0.51075	2.0477	0.029408	-6.09319	0.0393204	TRUE	miRanda,miRWalk,Targetscan	FALSE	-	FALSE	-
hsa-miR-509-5p	MIMAT0004779	ANGPT2	-0.524022	2.0477	0.029408	-2.87305	0.0406154	TRUE	miRanda,Targetscan	FALSE	-	FALSE	-
hsa-miR-194	MIMAT0000460	ANGPT2	-0.596814	2.0477	0.029408	-46.2178	9.52e-10	FALSE	-	FALSE	-	FALSE	-
hsa-miR-342-3p	MIMAT0000753	ANGPTL3	-0.720155	-5.45301	6.13e-09	2.3406	0.0190592	FALSE	-	FALSE	-	FALSE	-
hsa-miR-130b	MIMAT0000691	ANGPTL3	-0.602115	-5.45301	6.13e-09	3.80083	0.00520967	FALSE	-	FALSE	-	FALSE	-
hsa-miR-483-3p	MIMAT0002173	ANGPTL3	-0.502813	-5.45301	6.13e-09	8.10918	0.0126338	FALSE	-	FALSE	-	FALSE	-
hsa-miR-29b	MIMAT0000100	ANGPTL6	-0.578208	2.37897	0.000628774	-6.05381	1.53e-09	FALSE	-	FALSE	-	FALSE	-
hsa-miR-29a	MIMAT0000086	ANGPTL6	-0.516329	2.37897	0.000628774	-3.59987	1.48e-05	FALSE	-	FALSE	-	FALSE	-
hsa-miR-1825	MIMAT0006765	ANK3	-0.53683	-2.31488	6.92e-09	2.0258	0.0190592	TRUE	miRanda,miRWalk,Targetscan	FALSE	-	FALSE	-
hsa-miR-483-3p	MIMAT0002173	ANK3	-0.51556	-2.31488	6.92e-09	8.10918	0.0126338	TRUE	miRanda	FALSE	-	FALSE	-
hsa-miR-3148	MIMAT0015021	ANK3	-0.566012	-2.31488	6.92e-09	2.16406	8.93e-05	FALSE	-	FALSE	-	FALSE	-
hsa-miR-1281	MIMAT0005939	ANK3	-0.502452	-2.31488	6.92e-09	2.16453	0.00789577	FALSE	-	FALSE	-	FALSE	-
hsa-miR-4290	MIMAT0016921	ANK3	-0.513613	-2.31488	6.92e-09	2.16527	0.00455468	FALSE	-	FALSE	-	FALSE	-
hsa-miR-3149	MIMAT0015022	ANK3	-0.518748	-2.31488	6.92e-09	2.31002	0.00144797	FALSE	-	FALSE	-	FALSE	-
hsa-miR-595	MIMAT0003263	ANK3	-0.598671	-2.31488	6.92e-09	2.56618	0.000369323	FALSE	-	FALSE	-	FALSE	-
hsa-miR-320e	MIMAT0015072	ANK3	-0.563525	-2.31488	6.92e-09	2.96208	0.000298489	FALSE	-	FALSE	-	FALSE	-
hsa-miR-320d	MIMAT0006764	ANK3	-0.579229	-2.31488	6.92e-09	3.33924	0.000298489	FALSE	-	FALSE	-	FALSE	-
hsa-miR-320c	MIMAT0005793	ANK3	-0.732014	-2.31488	6.92e-09	3.59274	3.56e-09	FALSE	-	FALSE	-	FALSE	-
hsa-miR-29b	MIMAT0000100	ANKFN1	-0.61497	2.20558	0.000353613	-6.05381	1.53e-09	FALSE	-	FALSE	-	FALSE	-
hsa-miR-29a	MIMAT0000086	ANKFN1	-0.644639	2.20558	0.000353613	-3.59987	1.48e-05	FALSE	-	FALSE	-	FALSE	-
hsa-miR-22	MIMAT0000077	ANKFN1	-0.521921	2.20558	0.000353613	-2.15966	0.0040731	FALSE	-	FALSE	-	FALSE	-
hsa-miR-3148	MIMAT0015021	ANKRD18A	-0.518558	-2.04407	4.52e-06	2.16406	8.93e-05	FALSE	-	FALSE	-	FALSE	-
hsa-miR-3149	MIMAT0015022	ANKRD18A	-0.505578	-2.04407	4.52e-06	2.31002	0.00144797	FALSE	-	FALSE	-	FALSE	-
hsa-miR-1268	MIMAT0005922	ANKRD18A	-0.545851	-2.04407	4.52e-06	2.50794	7.21e-07	FALSE	-	FALSE	-	FALSE	-
hsa-miR-149	MIMAT0000450	ANKRD2	-0.518122	-4.16718	0.0281401	2.291	0.0120225	TRUE	miRanda	FALSE	-	FALSE	-
hsa-miR-342-3p	MIMAT0000753	ANKRD2	-0.693497	-4.16718	0.0281401	2.3406	0.0190592	FALSE	-	FALSE	-	FALSE	-
hsa-miR-320d	MIMAT0006764	ANKRD2	-0.506322	-4.16718	0.0281401	3.33924	0.000298489	FALSE	-	FALSE	-	FALSE	-
hsa-miR-130b	MIMAT0000691	ANKRD2	-0.642314	-4.16718	0.0281401	3.80083	0.00520967	FALSE	-	FALSE	-	FALSE	-
hsa-miR-483-3p	MIMAT0002173	ANKRD2	-0.568912	-4.16718	0.0281401	8.10918	0.0126338	FALSE	-	FALSE	-	FALSE	-
hsa-miR-130b	MIMAT0000691	ANKRD22	-0.503365	-2.41754	0.0262265	3.80083	0.00520967	FALSE	-	FALSE	-	FALSE	-
hsa-miR-194	MIMAT0000460	ANKRD35	-0.620965	2.3576	0.00636217	-46.2178	9.52e-10	FALSE	-	FALSE	-	FALSE	-
hsa-miR-192	MIMAT0000222	ANKRD35	-0.620231	2.3576	0.00636217	-28.5527	0.00455468	FALSE	-	FALSE	-	FALSE	-
hsa-miR-30c-2*	MIMAT0004550	ANKRD35	-0.576913	2.3576	0.00636217	-7.05949	0.000128821	FALSE	-	FALSE	-	FALSE	-
hsa-miR-30c	MIMAT0000244	ANKRD35	-0.528457	2.3576	0.00636217	-7.00515	8.66e-09	FALSE	-	FALSE	-	FALSE	-
hsa-miR-30e*	MIMAT0000693	ANKRD35	-0.515874	2.3576	0.00636217	-6.40949	2.86e-08	FALSE	-	FALSE	-	FALSE	-
hsa-miR-30e	MIMAT0000692	ANKRD35	-0.544657	2.3576	0.00636217	-3.67906	0.000527046	FALSE	-	FALSE	-	FALSE	-
hsa-miR-192*	MIMAT0004543	ANKRD35	-0.526444	2.3576	0.00636217	-2.59251	0.0496439	FALSE	-	FALSE	-	FALSE	-
hsa-miR-342-3p	MIMAT0000753	ANKS4B	-0.588696	-3.20333	3.93e-07	2.3406	0.0190592	TRUE	miRanda,miRDB,miRWalk,Targetscan	FALSE	-	FALSE	-
hsa-miR-1973	MIMAT0009448	ANO4	-0.502601	3.40523	2.22e-07	-22.3522	0.00154679	FALSE	-	FALSE	-	FALSE	-
hsa-miR-514	MIMAT0002883	ANO4	-0.590178	3.40523	2.22e-07	-9.56105	0.0315166	FALSE	-	FALSE	-	FALSE	-
hsa-miR-29c	MIMAT0000681	ANO4	-0.563631	3.40523	2.22e-07	-6.41599	7.63e-10	FALSE	-	FALSE	-	FALSE	-
hsa-miR-29b	MIMAT0000100	ANO4	-0.648581	3.40523	2.22e-07	-6.05381	1.53e-09	FALSE	-	FALSE	-	FALSE	-
hsa-miR-29a	MIMAT0000086	ANO4	-0.611756	3.40523	2.22e-07	-3.59987	1.48e-05	FALSE	-	FALSE	-	FALSE	-
hsa-miR-650	MIMAT0003320	ANO4	-0.522492	3.40523	2.22e-07	-2.82359	0.000641415	FALSE	-	FALSE	-	FALSE	-
hsa-miR-145	MIMAT0000437	ANO4	-0.503762	3.40523	2.22e-07	-2.30911	0.000190459	FALSE	-	FALSE	-	FALSE	-
hsa-miR-342-3p	MIMAT0000753	ANO5	-0.534885	-3.64528	8.74e-05	2.3406	0.0190592	FALSE	-	FALSE	-	FALSE	-
hsa-miR-130b	MIMAT0000691	ANO5	-0.564646	-3.64528	8.74e-05	3.80083	0.00520967	FALSE	-	FALSE	-	FALSE	-
hsa-miR-199b-5p	MIMAT0000263	ANO5	-0.576469	-3.64528	8.74e-05	4.57993	0.00988295	FALSE	-	FALSE	-	FALSE	-
hsa-miR-149	MIMAT0000450	ANPEP	-0.577243	-5.18756	1.24e-07	2.291	0.0120225	TRUE	miRanda,miRWalk,RNA22,Targetscan	FALSE	-	FALSE	-
hsa-miR-342-3p	MIMAT0000753	ANPEP	-0.744622	-5.18756	1.24e-07	2.3406	0.0190592	TRUE	miRanda	FALSE	-	FALSE	-
hsa-miR-130b	MIMAT0000691	ANPEP	-0.599386	-5.18756	1.24e-07	3.80083	0.00520967	FALSE	-	FALSE	-	FALSE	-
hsa-miR-483-3p	MIMAT0002173	ANPEP	-0.527123	-5.18756	1.24e-07	8.10918	0.0126338	FALSE	-	FALSE	-	FALSE	-
hsa-miR-514	MIMAT0002883	ANTXR1	-0.669044	2.91187	0.0158876	-9.56105	0.0315166	TRUE	miRanda,Targetscan	FALSE	-	FALSE	-
hsa-miR-30c-2*	MIMAT0004550	ANTXR1	-0.646579	2.91187	0.0158876	-7.05949	0.000128821	TRUE	miRanda,miRWalk	FALSE	-	FALSE	-
hsa-miR-30c	MIMAT0000244	ANTXR1	-0.533775	2.91187	0.0158876	-7.00515	8.66e-09	TRUE	miRanda,miRWalk,Targetscan	FALSE	-	FALSE	-
hsa-miR-138	MIMAT0000430	ANTXR1	-0.718748	2.91187	0.0158876	-6.09319	0.0393204	TRUE	Targetscan	FALSE	-	FALSE	-
hsa-miR-30b	MIMAT0000420	ANTXR1	-0.535476	2.91187	0.0158876	-5.18561	2.83e-06	TRUE	miRanda,miRWalk,Targetscan	FALSE	-	FALSE	-
hsa-miR-200b*	MIMAT0004571	ANTXR1	-0.532874	2.91187	0.0158876	-3.1324	0.0190592	TRUE	miRanda,miRWalk	FALSE	-	FALSE	-
hsa-miR-509-3-5p	MIMAT0004975	ANTXR1	-0.518	2.91187	0.0158876	-2.88187	0.0368071	TRUE	miRanda,miRWalk,Targetscan	FALSE	-	FALSE	-
hsa-miR-509-5p	MIMAT0004779	ANTXR1	-0.653751	2.91187	0.0158876	-2.87305	0.0406154	TRUE	miRanda,miRWalk,Targetscan	FALSE	-	FALSE	-
hsa-miR-650	MIMAT0003320	ANTXR1	-0.635055	2.91187	0.0158876	-2.82359	0.000641415	TRUE	miRanda,miRWalk	FALSE	-	FALSE	-
hsa-miR-192*	MIMAT0004543	ANTXR1	-0.63589	2.91187	0.0158876	-2.59251	0.0496439	TRUE	miRanda	FALSE	-	FALSE	-
hsa-miR-194	MIMAT0000460	ANTXR1	-0.759789	2.91187	0.0158876	-46.2178	9.52e-10	FALSE	-	FALSE	-	FALSE	-
hsa-miR-192	MIMAT0000222	ANTXR1	-0.696835	2.91187	0.0158876	-28.5527	0.00455468	FALSE	-	FALSE	-	FALSE	-
hsa-miR-429	MIMAT0001536	ANTXR1	-0.502405	2.91187	0.0158876	-28.4646	9.52e-10	FALSE	-	FALSE	-	FALSE	-
hsa-miR-1973	MIMAT0009448	ANTXR1	-0.665609	2.91187	0.0158876	-22.3522	0.00154679	FALSE	-	FALSE	-	FALSE	-
hsa-miR-200c	MIMAT0000617	ANTXR1	-0.519327	2.91187	0.0158876	-21.4575	7.21e-07	FALSE	-	FALSE	-	FALSE	-
hsa-miR-378	MIMAT0000732	ANTXR1	-0.671382	2.91187	0.0158876	-6.71232	0.000839801	FALSE	-	FALSE	-	FALSE	-
hsa-miR-4284	MIMAT0016915	ANTXR1	-0.684882	2.91187	0.0158876	-5.84348	0.00234241	FALSE	-	FALSE	-	FALSE	-
hsa-miR-514b-5p	MIMAT0015087	ANTXR1	-0.606062	2.91187	0.0158876	-4.34316	0.014236	FALSE	-	FALSE	-	FALSE	-
hsa-miR-3174	MIMAT0015051	ANTXR1	-0.694736	2.91187	0.0158876	-3.91365	0.0040731	FALSE	-	FALSE	-	FALSE	-
hsa-miR-4313	MIMAT0016865	ANTXR1	-0.541028	2.91187	0.0158876	-3.83928	0.0433536	FALSE	-	FALSE	-	FALSE	-
hsa-miR-184	MIMAT0000454	ANTXR1	-0.678757	2.91187	0.0158876	-3.77856	0.0471754	FALSE	-	FALSE	-	FALSE	-
hsa-miR-126	MIMAT0000445	ANTXR1	-0.500829	2.91187	0.0158876	-3.76663	4.46e-06	FALSE	-	FALSE	-	FALSE	-
hsa-miR-4286	MIMAT0016916	ANTXR1	-0.70134	2.91187	0.0158876	-3.75103	1.22e-07	FALSE	-	FALSE	-	FALSE	-
hsa-miR-4280	MIMAT0016911	ANTXR1	-0.577787	2.91187	0.0158876	-2.08514	0.00616155	FALSE	-	FALSE	-	FALSE	-
hsa-miR-342-3p	MIMAT0000753	ANXA9	-0.558345	-4.98732	0.000303669	2.3406	0.0190592	TRUE	miRWalk	FALSE	-	FALSE	-
hsa-miR-149	MIMAT0000450	ANXA9	-0.558242	-4.98732	0.000303669	2.291	0.0120225	FALSE	-	FALSE	-	FALSE	-
hsa-miR-320e	MIMAT0015072	ANXA9	-0.647825	-4.98732	0.000303669	2.96208	0.000298489	FALSE	-	FALSE	-	FALSE	-
hsa-miR-320d	MIMAT0006764	ANXA9	-0.678968	-4.98732	0.000303669	3.33924	0.000298489	FALSE	-	FALSE	-	FALSE	-
hsa-miR-320c	MIMAT0005793	ANXA9	-0.530528	-4.98732	0.000303669	3.59274	3.56e-09	FALSE	-	FALSE	-	FALSE	-
hsa-miR-199b-5p	MIMAT0000263	ANXA9	-0.525906	-4.98732	0.000303669	4.57993	0.00988295	FALSE	-	FALSE	-	FALSE	-
hsa-miR-483-3p	MIMAT0002173	ANXA9	-0.571343	-4.98732	0.000303669	8.10918	0.0126338	FALSE	-	FALSE	-	FALSE	-
hsa-miR-342-3p	MIMAT0000753	AOC1	-0.607693	-5.54905	9.59e-10	2.3406	0.0190592	FALSE	-	FALSE	-	FALSE	-
hsa-miR-483-3p	MIMAT0002173	AOC1	-0.525993	-5.54905	9.59e-10	8.10918	0.0126338	FALSE	-	FALSE	-	FALSE	-
hsa-miR-149	MIMAT0000450	AOX1	-0.617686	-2.70151	0.000232306	2.291	0.0120225	FALSE	-	FALSE	-	FALSE	-
hsa-miR-130b	MIMAT0000691	AOX1	-0.648358	-2.70151	0.000232306	3.80083	0.00520967	FALSE	-	FALSE	-	FALSE	-
hsa-miR-483-3p	MIMAT0002173	AOX1	-0.627239	-2.70151	0.000232306	8.10918	0.0126338	FALSE	-	FALSE	-	FALSE	-
hsa-miR-320d	MIMAT0006764	AP1M2	-0.51144	-4.75351	1.25e-06	3.33924	0.000298489	TRUE	miRanda	FALSE	-	FALSE	-
hsa-miR-320c	MIMAT0005793	AP1M2	-0.541119	-4.75351	1.25e-06	3.59274	3.56e-09	TRUE	miRanda	FALSE	-	FALSE	-
hsa-miR-485-3p	MIMAT0002176	AP1M2	-0.502072	-4.75351	1.25e-06	2.02334	0.0209151	FALSE	-	FALSE	-	FALSE	-
hsa-miR-320e	MIMAT0015072	AP1M2	-0.522874	-4.75351	1.25e-06	2.96208	0.000298489	FALSE	-	FALSE	-	FALSE	-
hsa-miR-34a	MIMAT0000255	AP1M2	-0.544899	-4.75351	1.25e-06	5.47031	0.0483291	FALSE	-	FALSE	-	FALSE	-
hsa-miR-342-3p	MIMAT0000753	AP1S3	-0.52867	-2.06082	0.00891294	2.3406	0.0190592	FALSE	-	FALSE	-	FALSE	-
hsa-miR-199b-5p	MIMAT0000263	AP1S3	-0.506709	-2.06082	0.00891294	4.57993	0.00988295	FALSE	-	FALSE	-	FALSE	-
hsa-miR-192*	MIMAT0004543	APBA2	-0.565123	3.01892	0.0128694	-2.59251	0.0496439	TRUE	miRanda,miRWalk	FALSE	-	FALSE	-
hsa-miR-22	MIMAT0000077	APBA2	-0.674516	3.01892	0.0128694	-2.15966	0.0040731	TRUE	miRanda,Targetscan	FALSE	-	FALSE	-
hsa-miR-204	MIMAT0000265	APBA2	-0.575597	3.01892	0.0128694	-36.81	0.00154679	FALSE	-	FALSE	-	FALSE	-
hsa-miR-514	MIMAT0002883	APBA2	-0.593888	3.01892	0.0128694	-9.56105	0.0315166	FALSE	-	FALSE	-	FALSE	-
hsa-miR-29c	MIMAT0000681	APBA2	-0.521134	3.01892	0.0128694	-6.41599	7.63e-10	FALSE	-	FALSE	-	FALSE	-
hsa-miR-29b	MIMAT0000100	APBA2	-0.640671	3.01892	0.0128694	-6.05381	1.53e-09	FALSE	-	FALSE	-	FALSE	-
hsa-miR-29a	MIMAT0000086	APBA2	-0.679146	3.01892	0.0128694	-3.59987	1.48e-05	FALSE	-	FALSE	-	FALSE	-
hsa-miR-145	MIMAT0000437	APBA2	-0.622693	3.01892	0.0128694	-2.30911	0.000190459	FALSE	-	FALSE	-	FALSE	-
hsa-miR-342-3p	MIMAT0000753	APCDD1L	-0.524579	-2.823	0.000423242	2.3406	0.0190592	TRUE	miRanda,Targetscan	FALSE	-	FALSE	-
hsa-miR-149	MIMAT0000450	APCDD1L	-0.520185	-2.823	0.000423242	2.291	0.0120225	FALSE	-	FALSE	-	FALSE	-
hsa-miR-149	MIMAT0000450	APCDD1L-AS1	-0.587136	-2.65823	0.00188659	2.291	0.0120225	FALSE	-	FALSE	-	FALSE	-
hsa-miR-342-3p	MIMAT0000753	APCDD1L-AS1	-0.553514	-2.65823	0.00188659	2.3406	0.0190592	FALSE	-	FALSE	-	FALSE	-
hsa-miR-130b	MIMAT0000691	APCDD1L-AS1	-0.516969	-2.65823	0.00188659	3.80083	0.00520967	FALSE	-	FALSE	-	FALSE	-
hsa-miR-483-3p	MIMAT0002173	APCDD1L-AS1	-0.581221	-2.65823	0.00188659	8.10918	0.0126338	FALSE	-	FALSE	-	FALSE	-
hsa-miR-532-3p	MIMAT0004780	APOBEC3C	-0.503939	2.00735	0.0143675	-5.3682	0.00494485	TRUE	miRanda,miRDB,miRWalk,Targetscan	FALSE	-	FALSE	-
hsa-miR-650	MIMAT0003320	APOBEC3C	-0.58013	2.00735	0.0143675	-2.82359	0.000641415	TRUE	miRanda,miRWalk,Targetscan	FALSE	-	FALSE	-
hsa-miR-194	MIMAT0000460	APOBEC3C	-0.613352	2.00735	0.0143675	-46.2178	9.52e-10	FALSE	-	FALSE	-	FALSE	-
hsa-miR-192	MIMAT0000222	APOBEC3C	-0.558663	2.00735	0.0143675	-28.5527	0.00455468	FALSE	-	FALSE	-	FALSE	-
hsa-miR-429	MIMAT0001536	APOBEC3C	-0.548469	2.00735	0.0143675	-28.4646	9.52e-10	FALSE	-	FALSE	-	FALSE	-
hsa-miR-30a*	MIMAT0000088	APOBEC3C	-0.508012	2.00735	0.0143675	-18.8146	0.00022834	FALSE	-	FALSE	-	FALSE	-
hsa-miR-514	MIMAT0002883	APOBEC3C	-0.559304	2.00735	0.0143675	-9.56105	0.0315166	FALSE	-	FALSE	-	FALSE	-
hsa-miR-30c-2*	MIMAT0004550	APOBEC3C	-0.540692	2.00735	0.0143675	-7.05949	0.000128821	FALSE	-	FALSE	-	FALSE	-
hsa-miR-138	MIMAT0000430	APOBEC3C	-0.639386	2.00735	0.0143675	-6.09319	0.0393204	FALSE	-	FALSE	-	FALSE	-
hsa-miR-362-3p	MIMAT0004683	APOBEC3C	-0.525521	2.00735	0.0143675	-3.80364	0.00120223	FALSE	-	FALSE	-	FALSE	-
hsa-miR-184	MIMAT0000454	APOBEC3C	-0.612142	2.00735	0.0143675	-3.77856	0.0471754	FALSE	-	FALSE	-	FALSE	-
hsa-miR-200b*	MIMAT0004571	APOBEC3C	-0.564772	2.00735	0.0143675	-3.1324	0.0190592	FALSE	-	FALSE	-	FALSE	-
hsa-miR-509-5p	MIMAT0004779	APOBEC3C	-0.51978	2.00735	0.0143675	-2.87305	0.0406154	FALSE	-	FALSE	-	FALSE	-
hsa-miR-192*	MIMAT0004543	APOBEC3C	-0.543058	2.00735	0.0143675	-2.59251	0.0496439	FALSE	-	FALSE	-	FALSE	-
hsa-miR-30a*	MIMAT0000088	APOC1	-0.563104	4.83923	0.00466154	-18.8146	0.00022834	TRUE	miRanda	FALSE	-	FALSE	-
hsa-miR-30e*	MIMAT0000693	APOC1	-0.577471	4.83923	0.00466154	-6.40949	2.86e-08	TRUE	miRanda	FALSE	-	FALSE	-
hsa-miR-194	MIMAT0000460	APOC1	-0.660766	4.83923	0.00466154	-46.2178	9.52e-10	FALSE	-	FALSE	-	FALSE	-
hsa-miR-204	MIMAT0000265	APOC1	-0.631547	4.83923	0.00466154	-36.81	0.00154679	FALSE	-	FALSE	-	FALSE	-
hsa-miR-192	MIMAT0000222	APOC1	-0.642332	4.83923	0.00466154	-28.5527	0.00455468	FALSE	-	FALSE	-	FALSE	-
hsa-miR-429	MIMAT0001536	APOC1	-0.516696	4.83923	0.00466154	-28.4646	9.52e-10	FALSE	-	FALSE	-	FALSE	-
hsa-miR-30a	MIMAT0000087	APOC1	-0.508387	4.83923	0.00466154	-16.9463	7.4e-12	FALSE	-	FALSE	-	FALSE	-
hsa-miR-514	MIMAT0002883	APOC1	-0.523177	4.83923	0.00466154	-9.56105	0.0315166	FALSE	-	FALSE	-	FALSE	-
hsa-miR-30c-2*	MIMAT0004550	APOC1	-0.532405	4.83923	0.00466154	-7.05949	0.000128821	FALSE	-	FALSE	-	FALSE	-
hsa-miR-30c	MIMAT0000244	APOC1	-0.636494	4.83923	0.00466154	-7.00515	8.66e-09	FALSE	-	FALSE	-	FALSE	-
hsa-miR-138	MIMAT0000430	APOC1	-0.506155	4.83923	0.00466154	-6.09319	0.0393204	FALSE	-	FALSE	-	FALSE	-
hsa-miR-4284	MIMAT0016915	APOC1	-0.619292	4.83923	0.00466154	-5.84348	0.00234241	FALSE	-	FALSE	-	FALSE	-
hsa-miR-30b	MIMAT0000420	APOC1	-0.591719	4.83923	0.00466154	-5.18561	2.83e-06	FALSE	-	FALSE	-	FALSE	-
hsa-miR-192*	MIMAT0004543	APOC1	-0.553555	4.83923	0.00466154	-2.59251	0.0496439	FALSE	-	FALSE	-	FALSE	-
hsa-miR-363	MIMAT0000707	APOC1	-0.517741	4.83923	0.00466154	-2.52828	0.0236749	FALSE	-	FALSE	-	FALSE	-
hsa-miR-4254	MIMAT0016884	APOC1	-0.630481	4.83923	0.00466154	-2.23216	0.044083	FALSE	-	FALSE	-	FALSE	-
hsa-miR-149	MIMAT0000450	APOC3	-0.527705	-4.25177	4.06e-07	2.291	0.0120225	FALSE	-	FALSE	-	FALSE	-
hsa-miR-342-3p	MIMAT0000753	APOC3	-0.706871	-4.25177	4.06e-07	2.3406	0.0190592	FALSE	-	FALSE	-	FALSE	-
hsa-miR-130b	MIMAT0000691	APOC3	-0.559708	-4.25177	4.06e-07	3.80083	0.00520967	FALSE	-	FALSE	-	FALSE	-
hsa-miR-149	MIMAT0000450	APOH	-0.510475	-5.55386	0.00103986	2.291	0.0120225	FALSE	-	FALSE	-	FALSE	-
hsa-miR-342-3p	MIMAT0000753	APOH	-0.665241	-5.55386	0.00103986	2.3406	0.0190592	FALSE	-	FALSE	-	FALSE	-
hsa-miR-320d	MIMAT0006764	APOH	-0.500043	-5.55386	0.00103986	3.33924	0.000298489	FALSE	-	FALSE	-	FALSE	-
hsa-miR-130b	MIMAT0000691	APOH	-0.538373	-5.55386	0.00103986	3.80083	0.00520967	FALSE	-	FALSE	-	FALSE	-
hsa-miR-483-3p	MIMAT0002173	APOH	-0.533329	-5.55386	0.00103986	8.10918	0.0126338	FALSE	-	FALSE	-	FALSE	-
hsa-miR-34b*	MIMAT0000685	APOM	-0.562535	-4.05884	4.04e-06	2.25678	0.0363362	FALSE	-	FALSE	-	FALSE	-
hsa-miR-342-3p	MIMAT0000753	APOM	-0.538605	-4.05884	4.04e-06	2.3406	0.0190592	FALSE	-	FALSE	-	FALSE	-
hsa-miR-320e	MIMAT0015072	APOM	-0.530317	-4.05884	4.04e-06	2.96208	0.000298489	FALSE	-	FALSE	-	FALSE	-
hsa-miR-320d	MIMAT0006764	APOM	-0.561977	-4.05884	4.04e-06	3.33924	0.000298489	FALSE	-	FALSE	-	FALSE	-
hsa-miR-199b-5p	MIMAT0000263	APOM	-0.505022	-4.05884	4.04e-06	4.57993	0.00988295	FALSE	-	FALSE	-	FALSE	-
hsa-miR-34a	MIMAT0000255	APOM	-0.594482	-4.05884	4.04e-06	5.47031	0.0483291	FALSE	-	FALSE	-	FALSE	-
hsa-miR-149	MIMAT0000450	AQP1	-0.534327	-3.41123	2.42e-08	2.291	0.0120225	TRUE	RNA22,Targetscan	FALSE	-	FALSE	-
hsa-miR-483-3p	MIMAT0002173	AQP1	-0.696197	-3.41123	2.42e-08	8.10918	0.0126338	TRUE	miRWalk,Targetscan	FALSE	-	FALSE	-
hsa-miR-342-3p	MIMAT0000753	AQP1	-0.60428	-3.41123	2.42e-08	2.3406	0.0190592	FALSE	-	FALSE	-	FALSE	-
hsa-miR-130b	MIMAT0000691	AQP1	-0.621254	-3.41123	2.42e-08	3.80083	0.00520967	FALSE	-	FALSE	-	FALSE	-
hsa-miR-342-3p	MIMAT0000753	AQP2	-0.637833	-12.0363	5.7e-07	2.3406	0.0190592	TRUE	miRanda,Targetscan	FALSE	-	FALSE	-
hsa-miR-199b-5p	MIMAT0000263	AQP2	-0.552826	-12.0363	5.7e-07	4.57993	0.00988295	TRUE	miRanda,Targetscan	FALSE	-	FALSE	-
hsa-miR-483-3p	MIMAT0002173	AQP2	-0.525087	-12.0363	5.7e-07	8.10918	0.0126338	TRUE	miRanda	FALSE	-	FALSE	-
hsa-miR-130b	MIMAT0000691	AQP2	-0.554052	-12.0363	5.7e-07	3.80083	0.00520967	FALSE	-	FALSE	-	FALSE	-
hsa-miR-342-3p	MIMAT0000753	AQP3	-0.546002	-4.1276	0.0215347	2.3406	0.0190592	FALSE	-	FALSE	-	FALSE	-
hsa-miR-382	MIMAT0000737	AQP3	-0.500055	-4.1276	0.0215347	2.51265	0.000951205	FALSE	-	FALSE	-	FALSE	-
hsa-miR-320c	MIMAT0005793	AQP6	-0.508134	-4.4306	3.36e-08	3.59274	3.56e-09	FALSE	-	FALSE	-	FALSE	-
hsa-miR-342-3p	MIMAT0000753	AQP7	-0.753508	-2.50067	0.00676336	2.3406	0.0190592	FALSE	-	FALSE	-	FALSE	-
hsa-miR-130b	MIMAT0000691	AQP7	-0.524049	-2.50067	0.00676336	3.80083	0.00520967	FALSE	-	FALSE	-	FALSE	-
hsa-miR-342-3p	MIMAT0000753	AQP7P1	-0.677548	-3.21233	0.00435106	2.3406	0.0190592	FALSE	-	FALSE	-	FALSE	-
hsa-miR-320e	MIMAT0015072	AQP7P1	-0.520994	-3.21233	0.00435106	2.96208	0.000298489	FALSE	-	FALSE	-	FALSE	-
hsa-miR-320d	MIMAT0006764	AQP7P1	-0.550661	-3.21233	0.00435106	3.33924	0.000298489	FALSE	-	FALSE	-	FALSE	-
hsa-miR-130b	MIMAT0000691	AQP7P1	-0.539841	-3.21233	0.00435106	3.80083	0.00520967	FALSE	-	FALSE	-	FALSE	-
hsa-miR-483-3p	MIMAT0002173	AQP7P1	-0.558284	-3.21233	0.00435106	8.10918	0.0126338	FALSE	-	FALSE	-	FALSE	-
hsa-miR-149	MIMAT0000450	AQP7P3	-0.532345	-3.87591	0.00241193	2.291	0.0120225	FALSE	-	FALSE	-	FALSE	-
hsa-miR-342-3p	MIMAT0000753	AQP7P3	-0.58509	-3.87591	0.00241193	2.3406	0.0190592	FALSE	-	FALSE	-	FALSE	-
hsa-miR-130b	MIMAT0000691	AQP7P3	-0.546846	-3.87591	0.00241193	3.80083	0.00520967	FALSE	-	FALSE	-	FALSE	-
hsa-miR-483-3p	MIMAT0002173	AQP7P3	-0.568008	-3.87591	0.00241193	8.10918	0.0126338	FALSE	-	FALSE	-	FALSE	-
hsa-miR-206	MIMAT0000462	ARG2	-0.570786	-3.43167	1.81e-06	2.14193	0.00699125	TRUE	miRanda,miRWalk,Targetscan	FALSE	-	FALSE	-
hsa-miR-34b*	MIMAT0000685	ARG2	-0.514921	-3.43167	1.81e-06	2.25678	0.0363362	TRUE	miRanda,miRWalk	FALSE	-	FALSE	-
hsa-miR-34a	MIMAT0000255	ARG2	-0.633301	-3.43167	1.81e-06	5.47031	0.0483291	TRUE	miRanda,Targetscan	FALSE	-	FALSE	-
hsa-miR-382	MIMAT0000737	ARG2	-0.632592	-3.43167	1.81e-06	2.51265	0.000951205	FALSE	-	FALSE	-	FALSE	-
hsa-miR-199b-5p	MIMAT0000263	ARG2	-0.628716	-3.43167	1.81e-06	4.57993	0.00988295	FALSE	-	FALSE	-	FALSE	-
hsa-miR-194	MIMAT0000460	ARHGAP20	-0.532692	2.12449	0.00143616	-46.2178	9.52e-10	FALSE	-	FALSE	-	FALSE	-
hsa-miR-1973	MIMAT0009448	ARHGAP20	-0.556302	2.12449	0.00143616	-22.3522	0.00154679	FALSE	-	FALSE	-	FALSE	-
hsa-miR-30c-2*	MIMAT0004550	ARHGAP20	-0.522676	2.12449	0.00143616	-7.05949	0.000128821	FALSE	-	FALSE	-	FALSE	-
hsa-miR-4313	MIMAT0016865	ARHGAP20	-0.517237	2.12449	0.00143616	-3.83928	0.0433536	FALSE	-	FALSE	-	FALSE	-
hsa-miR-509-3-5p	MIMAT0004975	ARHGAP22	-0.529368	2.49425	0.00462662	-2.88187	0.0368071	TRUE	miRanda	FALSE	-	FALSE	-
hsa-miR-509-5p	MIMAT0004779	ARHGAP22	-0.553633	2.49425	0.00462662	-2.87305	0.0406154	TRUE	miRanda	FALSE	-	FALSE	-
hsa-miR-194	MIMAT0000460	ARHGAP22	-0.68926	2.49425	0.00462662	-46.2178	9.52e-10	FALSE	-	FALSE	-	FALSE	-
hsa-miR-204	MIMAT0000265	ARHGAP22	-0.550226	2.49425	0.00462662	-36.81	0.00154679	FALSE	-	FALSE	-	FALSE	-
hsa-miR-192	MIMAT0000222	ARHGAP22	-0.644641	2.49425	0.00462662	-28.5527	0.00455468	FALSE	-	FALSE	-	FALSE	-
hsa-miR-30a*	MIMAT0000088	ARHGAP22	-0.525885	2.49425	0.00462662	-18.8146	0.00022834	FALSE	-	FALSE	-	FALSE	-
hsa-miR-514	MIMAT0002883	ARHGAP22	-0.570877	2.49425	0.00462662	-9.56105	0.0315166	FALSE	-	FALSE	-	FALSE	-
hsa-miR-30c-2*	MIMAT0004550	ARHGAP22	-0.520941	2.49425	0.00462662	-7.05949	0.000128821	FALSE	-	FALSE	-	FALSE	-
hsa-miR-30c	MIMAT0000244	ARHGAP22	-0.592039	2.49425	0.00462662	-7.00515	8.66e-09	FALSE	-	FALSE	-	FALSE	-
hsa-miR-30e*	MIMAT0000693	ARHGAP22	-0.507161	2.49425	0.00462662	-6.40949	2.86e-08	FALSE	-	FALSE	-	FALSE	-
hsa-miR-138	MIMAT0000430	ARHGAP22	-0.589277	2.49425	0.00462662	-6.09319	0.0393204	FALSE	-	FALSE	-	FALSE	-
hsa-miR-4284	MIMAT0016915	ARHGAP22	-0.660685	2.49425	0.00462662	-5.84348	0.00234241	FALSE	-	FALSE	-	FALSE	-
hsa-miR-30b	MIMAT0000420	ARHGAP22	-0.607257	2.49425	0.00462662	-5.18561	2.83e-06	FALSE	-	FALSE	-	FALSE	-
hsa-miR-3174	MIMAT0015051	ARHGAP22	-0.549936	2.49425	0.00462662	-3.91365	0.0040731	FALSE	-	FALSE	-	FALSE	-
hsa-miR-126	MIMAT0000445	ARHGAP22	-0.51557	2.49425	0.00462662	-3.76663	4.46e-06	FALSE	-	FALSE	-	FALSE	-
hsa-miR-4286	MIMAT0016916	ARHGAP22	-0.580728	2.49425	0.00462662	-3.75103	1.22e-07	FALSE	-	FALSE	-	FALSE	-
hsa-miR-3607-5p	MIMAT0017984	ARHGAP22	-0.562718	2.49425	0.00462662	-3.66125	0.00729408	FALSE	-	FALSE	-	FALSE	-
hsa-miR-192*	MIMAT0004543	ARHGAP22	-0.550327	2.49425	0.00462662	-2.59251	0.0496439	FALSE	-	FALSE	-	FALSE	-
hsa-miR-363	MIMAT0000707	ARHGAP22	-0.543202	2.49425	0.00462662	-2.52828	0.0236749	FALSE	-	FALSE	-	FALSE	-
hsa-miR-4254	MIMAT0016884	ARHGAP22	-0.535271	2.49425	0.00462662	-2.23216	0.044083	FALSE	-	FALSE	-	FALSE	-
hsa-miR-130b	MIMAT0000691	ARHGAP29	-0.592119	-2.12014	1.48e-05	3.80083	0.00520967	TRUE	miRanda,miRWalk	FALSE	-	FALSE	-
hsa-miR-483-3p	MIMAT0002173	ARHGAP29	-0.744615	-2.12014	1.48e-05	8.10918	0.0126338	TRUE	miRanda,Targetscan	FALSE	-	FALSE	-
hsa-miR-149	MIMAT0000450	ARHGAP29	-0.652548	-2.12014	1.48e-05	2.291	0.0120225	FALSE	-	FALSE	-	FALSE	-
hsa-miR-320c	MIMAT0005793	ARHGAP8	-0.531532	-3.33989	2.11e-08	3.59274	3.56e-09	FALSE	-	FALSE	-	FALSE	-
hsa-miR-595	MIMAT0003263	ARHGEF16	-0.595527	-3.19794	6.47e-09	2.56618	0.000369323	TRUE	miRanda,miRWalk	FALSE	-	FALSE	-
hsa-miR-485-3p	MIMAT0002176	ARHGEF16	-0.584818	-3.19794	6.47e-09	2.02334	0.0209151	FALSE	-	FALSE	-	FALSE	-
hsa-miR-1825	MIMAT0006765	ARHGEF16	-0.504649	-3.19794	6.47e-09	2.0258	0.0190592	FALSE	-	FALSE	-	FALSE	-
hsa-miR-3148	MIMAT0015021	ARHGEF16	-0.575592	-3.19794	6.47e-09	2.16406	8.93e-05	FALSE	-	FALSE	-	FALSE	-
hsa-miR-4290	MIMAT0016921	ARHGEF16	-0.556567	-3.19794	6.47e-09	2.16527	0.00455468	FALSE	-	FALSE	-	FALSE	-
hsa-miR-3149	MIMAT0015022	ARHGEF16	-0.525617	-3.19794	6.47e-09	2.31002	0.00144797	FALSE	-	FALSE	-	FALSE	-
hsa-miR-382	MIMAT0000737	ARHGEF16	-0.55606	-3.19794	6.47e-09	2.51265	0.000951205	FALSE	-	FALSE	-	FALSE	-
hsa-miR-320c	MIMAT0005793	ARHGEF16	-0.562491	-3.19794	6.47e-09	3.59274	3.56e-09	FALSE	-	FALSE	-	FALSE	-
hsa-miR-34a	MIMAT0000255	ARHGEF16	-0.562988	-3.19794	6.47e-09	5.47031	0.0483291	FALSE	-	FALSE	-	FALSE	-
hsa-miR-149	MIMAT0000450	ARHGEF38	-0.574624	-2.78401	1.3e-08	2.291	0.0120225	FALSE	-	FALSE	-	FALSE	-
hsa-miR-342-3p	MIMAT0000753	ARHGEF38	-0.663391	-2.78401	1.3e-08	2.3406	0.0190592	FALSE	-	FALSE	-	FALSE	-
hsa-miR-130b	MIMAT0000691	ARHGEF38	-0.517982	-2.78401	1.3e-08	3.80083	0.00520967	FALSE	-	FALSE	-	FALSE	-
hsa-miR-483-3p	MIMAT0002173	ARHGEF38	-0.52497	-2.78401	1.3e-08	8.10918	0.0126338	FALSE	-	FALSE	-	FALSE	-
hsa-miR-34a	MIMAT0000255	ARL4D	-0.530924	-2.52512	9.18e-07	5.47031	0.0483291	FALSE	-	FALSE	-	FALSE	-
hsa-miR-194	MIMAT0000460	ARL9	-0.603779	2.57757	0.00183515	-46.2178	9.52e-10	FALSE	-	FALSE	-	FALSE	-
hsa-miR-204	MIMAT0000265	ARL9	-0.574169	2.57757	0.00183515	-36.81	0.00154679	FALSE	-	FALSE	-	FALSE	-
hsa-miR-192	MIMAT0000222	ARL9	-0.5663	2.57757	0.00183515	-28.5527	0.00455468	FALSE	-	FALSE	-	FALSE	-
hsa-miR-1973	MIMAT0009448	ARL9	-0.533701	2.57757	0.00183515	-22.3522	0.00154679	FALSE	-	FALSE	-	FALSE	-
hsa-miR-30a*	MIMAT0000088	ARL9	-0.535199	2.57757	0.00183515	-18.8146	0.00022834	FALSE	-	FALSE	-	FALSE	-
hsa-miR-30a	MIMAT0000087	ARL9	-0.516226	2.57757	0.00183515	-16.9463	7.4e-12	FALSE	-	FALSE	-	FALSE	-
hsa-miR-514	MIMAT0002883	ARL9	-0.632423	2.57757	0.00183515	-9.56105	0.0315166	FALSE	-	FALSE	-	FALSE	-
hsa-miR-30c-2*	MIMAT0004550	ARL9	-0.547864	2.57757	0.00183515	-7.05949	0.000128821	FALSE	-	FALSE	-	FALSE	-
hsa-miR-29c	MIMAT0000681	ARL9	-0.72655	2.57757	0.00183515	-6.41599	7.63e-10	FALSE	-	FALSE	-	FALSE	-
hsa-miR-29b	MIMAT0000100	ARL9	-0.742645	2.57757	0.00183515	-6.05381	1.53e-09	FALSE	-	FALSE	-	FALSE	-
hsa-miR-3174	MIMAT0015051	ARL9	-0.525606	2.57757	0.00183515	-3.91365	0.0040731	FALSE	-	FALSE	-	FALSE	-
hsa-miR-4313	MIMAT0016865	ARL9	-0.501339	2.57757	0.00183515	-3.83928	0.0433536	FALSE	-	FALSE	-	FALSE	-
hsa-miR-184	MIMAT0000454	ARL9	-0.556324	2.57757	0.00183515	-3.77856	0.0471754	FALSE	-	FALSE	-	FALSE	-
hsa-miR-29a	MIMAT0000086	ARL9	-0.636794	2.57757	0.00183515	-3.59987	1.48e-05	FALSE	-	FALSE	-	FALSE	-
hsa-miR-509-5p	MIMAT0004779	ARL9	-0.509227	2.57757	0.00183515	-2.87305	0.0406154	FALSE	-	FALSE	-	FALSE	-
hsa-miR-192*	MIMAT0004543	ARL9	-0.593507	2.57757	0.00183515	-2.59251	0.0496439	FALSE	-	FALSE	-	FALSE	-
hsa-miR-29c*	MIMAT0004673	ARL9	-0.528243	2.57757	0.00183515	-2.48117	0.0315166	FALSE	-	FALSE	-	FALSE	-
hsa-miR-3619	MIMAT0017999	ARL9	-0.530137	2.57757	0.00183515	-2.22165	7.57e-06	FALSE	-	FALSE	-	FALSE	-
hsa-miR-22*	MIMAT0004495	ARL9	-0.615707	2.57757	0.00183515	-2.18871	3.33e-06	FALSE	-	FALSE	-	FALSE	-
hsa-miR-22	MIMAT0000077	ARL9	-0.598917	2.57757	0.00183515	-2.15966	0.0040731	FALSE	-	FALSE	-	FALSE	-
hsa-miR-342-3p	MIMAT0000753	ARSE	-0.556772	-4.06286	1.5e-09	2.3406	0.0190592	FALSE	-	FALSE	-	FALSE	-
hsa-miR-320c	MIMAT0005793	ARSE	-0.518547	-4.06286	1.5e-09	3.59274	3.56e-09	FALSE	-	FALSE	-	FALSE	-
hsa-miR-130b	MIMAT0000691	ARSE	-0.544795	-4.06286	1.5e-09	3.80083	0.00520967	FALSE	-	FALSE	-	FALSE	-
hsa-miR-483-3p	MIMAT0002173	ARSE	-0.52677	-4.06286	1.5e-09	8.10918	0.0126338	FALSE	-	FALSE	-	FALSE	-
hsa-miR-342-3p	MIMAT0000753	ARSF	-0.69876	-3.38063	3.44e-07	2.3406	0.0190592	FALSE	-	FALSE	-	FALSE	-
hsa-miR-130b	MIMAT0000691	ARSF	-0.518541	-3.38063	3.44e-07	3.80083	0.00520967	FALSE	-	FALSE	-	FALSE	-
hsa-miR-342-3p	MIMAT0000753	ASB15	-0.721718	-5.4165	1.67e-06	2.3406	0.0190592	FALSE	-	FALSE	-	FALSE	-
hsa-miR-320d	MIMAT0006764	ASB15	-0.516339	-5.4165	1.67e-06	3.33924	0.000298489	FALSE	-	FALSE	-	FALSE	-
hsa-miR-130b	MIMAT0000691	ASB15	-0.538549	-5.4165	1.67e-06	3.80083	0.00520967	FALSE	-	FALSE	-	FALSE	-
hsa-miR-34a	MIMAT0000255	ASB9	-0.583873	-2.66729	2.28e-13	5.47031	0.0483291	FALSE	-	FALSE	-	FALSE	-
hsa-miR-34a	MIMAT0000255	ASB9P1	-0.524888	-2.26919	2.28e-06	5.47031	0.0483291	FALSE	-	FALSE	-	FALSE	-
hsa-miR-483-3p	MIMAT0002173	ASB9P1	-0.502439	-2.26919	2.28e-06	8.10918	0.0126338	FALSE	-	FALSE	-	FALSE	-
hsa-miR-4327	MIMAT0016889	ASCL3	-0.518818	-2.02359	0.0410602	2.04839	0.0486507	FALSE	-	FALSE	-	FALSE	-
hsa-miR-342-3p	MIMAT0000753	ASCL3	-0.537258	-2.02359	0.0410602	2.3406	0.0190592	FALSE	-	FALSE	-	FALSE	-
hsa-miR-204	MIMAT0000265	ASGR1	-0.78429	2.0645	0.000808942	-36.81	0.00154679	TRUE	miRWalk,Targetscan	FALSE	-	FALSE	-
hsa-miR-362-5p	MIMAT0000705	ASGR1	-0.514193	2.0645	0.000808942	-3.72617	0.0195059	TRUE	miRanda,Targetscan	FALSE	-	FALSE	-
hsa-miR-200a	MIMAT0000682	ASGR1	-0.6878	2.0645	0.000808942	-46.4655	2.79e-13	FALSE	-	FALSE	-	FALSE	-
hsa-miR-194	MIMAT0000460	ASGR1	-0.727176	2.0645	0.000808942	-46.2178	9.52e-10	FALSE	-	FALSE	-	FALSE	-
hsa-miR-200b	MIMAT0000318	ASGR1	-0.661372	2.0645	0.000808942	-35.3775	3.1e-06	FALSE	-	FALSE	-	FALSE	-
hsa-miR-141	MIMAT0000432	ASGR1	-0.514048	2.0645	0.000808942	-31.9336	0.000951205	FALSE	-	FALSE	-	FALSE	-
hsa-miR-192	MIMAT0000222	ASGR1	-0.771893	2.0645	0.000808942	-28.5527	0.00455468	FALSE	-	FALSE	-	FALSE	-
hsa-miR-429	MIMAT0001536	ASGR1	-0.724033	2.0645	0.000808942	-28.4646	9.52e-10	FALSE	-	FALSE	-	FALSE	-
hsa-miR-1973	MIMAT0009448	ASGR1	-0.528497	2.0645	0.000808942	-22.3522	0.00154679	FALSE	-	FALSE	-	FALSE	-
hsa-miR-200c	MIMAT0000617	ASGR1	-0.5238	2.0645	0.000808942	-21.4575	7.21e-07	FALSE	-	FALSE	-	FALSE	-
hsa-miR-30a*	MIMAT0000088	ASGR1	-0.779305	2.0645	0.000808942	-18.8146	0.00022834	FALSE	-	FALSE	-	FALSE	-
hsa-miR-30a	MIMAT0000087	ASGR1	-0.751599	2.0645	0.000808942	-16.9463	7.4e-12	FALSE	-	FALSE	-	FALSE	-
hsa-miR-514	MIMAT0002883	ASGR1	-0.685612	2.0645	0.000808942	-9.56105	0.0315166	FALSE	-	FALSE	-	FALSE	-
hsa-miR-30c-2*	MIMAT0004550	ASGR1	-0.768149	2.0645	0.000808942	-7.05949	0.000128821	FALSE	-	FALSE	-	FALSE	-
hsa-miR-30c	MIMAT0000244	ASGR1	-0.687981	2.0645	0.000808942	-7.00515	8.66e-09	FALSE	-	FALSE	-	FALSE	-
hsa-miR-30e*	MIMAT0000693	ASGR1	-0.666185	2.0645	0.000808942	-6.40949	2.86e-08	FALSE	-	FALSE	-	FALSE	-
hsa-miR-532-3p	MIMAT0004780	ASGR1	-0.596212	2.0645	0.000808942	-5.3682	0.00494485	FALSE	-	FALSE	-	FALSE	-
hsa-miR-532-5p	MIMAT0002888	ASGR1	-0.532306	2.0645	0.000808942	-4.15879	0.000754552	FALSE	-	FALSE	-	FALSE	-
hsa-miR-30d	MIMAT0000245	ASGR1	-0.687139	2.0645	0.000808942	-4.08877	0.0040731	FALSE	-	FALSE	-	FALSE	-
hsa-miR-4313	MIMAT0016865	ASGR1	-0.519546	2.0645	0.000808942	-3.83928	0.0433536	FALSE	-	FALSE	-	FALSE	-
hsa-miR-30e	MIMAT0000692	ASGR1	-0.59677	2.0645	0.000808942	-3.67906	0.000527046	FALSE	-	FALSE	-	FALSE	-
hsa-miR-200b*	MIMAT0004571	ASGR1	-0.591591	2.0645	0.000808942	-3.1324	0.0190592	FALSE	-	FALSE	-	FALSE	-
hsa-miR-650	MIMAT0003320	ASGR1	-0.705472	2.0645	0.000808942	-2.82359	0.000641415	FALSE	-	FALSE	-	FALSE	-
hsa-miR-500a*	MIMAT0002871	ASGR1	-0.510188	2.0645	0.000808942	-2.69328	0.0492036	FALSE	-	FALSE	-	FALSE	-
hsa-miR-192*	MIMAT0004543	ASGR1	-0.690518	2.0645	0.000808942	-2.59251	0.0496439	FALSE	-	FALSE	-	FALSE	-
hsa-miR-363	MIMAT0000707	ASGR1	-0.510444	2.0645	0.000808942	-2.52828	0.0236749	FALSE	-	FALSE	-	FALSE	-
hsa-miR-665	MIMAT0004952	ASGR1	-0.612518	2.0645	0.000808942	-2.17957	0.0468347	FALSE	-	FALSE	-	FALSE	-
hsa-miR-130b	MIMAT0000691	ASPA	-0.520711	-4.44675	2.03e-08	3.80083	0.00520967	FALSE	-	FALSE	-	FALSE	-
hsa-miR-483-3p	MIMAT0002173	ASPA	-0.567032	-4.44675	2.03e-08	8.10918	0.0126338	FALSE	-	FALSE	-	FALSE	-
hsa-miR-149	MIMAT0000450	ASPDH	-0.518508	-3.07385	5.96e-09	2.291	0.0120225	FALSE	-	FALSE	-	FALSE	-
hsa-miR-342-3p	MIMAT0000753	ASPDH	-0.612947	-3.07385	5.96e-09	2.3406	0.0190592	FALSE	-	FALSE	-	FALSE	-
hsa-miR-130b	MIMAT0000691	ASPDH	-0.521851	-3.07385	5.96e-09	3.80083	0.00520967	FALSE	-	FALSE	-	FALSE	-
hsa-miR-149	MIMAT0000450	ASPG	-0.560428	-6.13385	3.42e-10	2.291	0.0120225	FALSE	-	FALSE	-	FALSE	-
hsa-miR-342-3p	MIMAT0000753	ASPG	-0.605952	-6.13385	3.42e-10	2.3406	0.0190592	FALSE	-	FALSE	-	FALSE	-
hsa-miR-130b	MIMAT0000691	ASPG	-0.589138	-6.13385	3.42e-10	3.80083	0.00520967	FALSE	-	FALSE	-	FALSE	-
hsa-miR-483-3p	MIMAT0002173	ASPG	-0.600671	-6.13385	3.42e-10	8.10918	0.0126338	FALSE	-	FALSE	-	FALSE	-
hsa-miR-194	MIMAT0000460	ASPM	-0.588826	4.26673	0.0264292	-46.2178	9.52e-10	FALSE	-	FALSE	-	FALSE	-
hsa-miR-204	MIMAT0000265	ASPM	-0.593041	4.26673	0.0264292	-36.81	0.00154679	FALSE	-	FALSE	-	FALSE	-
hsa-miR-30a*	MIMAT0000088	ASPM	-0.607272	4.26673	0.0264292	-18.8146	0.00022834	FALSE	-	FALSE	-	FALSE	-
hsa-miR-30a	MIMAT0000087	ASPM	-0.529292	4.26673	0.0264292	-16.9463	7.4e-12	FALSE	-	FALSE	-	FALSE	-
hsa-miR-514	MIMAT0002883	ASPM	-0.56806	4.26673	0.0264292	-9.56105	0.0315166	FALSE	-	FALSE	-	FALSE	-
hsa-miR-30c-2*	MIMAT0004550	ASPM	-0.543704	4.26673	0.0264292	-7.05949	0.000128821	FALSE	-	FALSE	-	FALSE	-
hsa-miR-29c	MIMAT0000681	ASPM	-0.741658	4.26673	0.0264292	-6.41599	7.63e-10	FALSE	-	FALSE	-	FALSE	-
hsa-miR-29b	MIMAT0000100	ASPM	-0.667953	4.26673	0.0264292	-6.05381	1.53e-09	FALSE	-	FALSE	-	FALSE	-
hsa-miR-30d	MIMAT0000245	ASPM	-0.588836	4.26673	0.0264292	-4.08877	0.0040731	FALSE	-	FALSE	-	FALSE	-
hsa-miR-4313	MIMAT0016865	ASPM	-0.501477	4.26673	0.0264292	-3.83928	0.0433536	FALSE	-	FALSE	-	FALSE	-
hsa-miR-502-3p	MIMAT0004775	ASPM	-0.631553	4.26673	0.0264292	-3.83844	0.0195059	FALSE	-	FALSE	-	FALSE	-
hsa-miR-362-5p	MIMAT0000705	ASPM	-0.511363	4.26673	0.0264292	-3.72617	0.0195059	FALSE	-	FALSE	-	FALSE	-
hsa-miR-29a	MIMAT0000086	ASPM	-0.727901	4.26673	0.0264292	-3.59987	1.48e-05	FALSE	-	FALSE	-	FALSE	-
hsa-miR-650	MIMAT0003320	ASPM	-0.562516	4.26673	0.0264292	-2.82359	0.000641415	FALSE	-	FALSE	-	FALSE	-
hsa-miR-500a*	MIMAT0002871	ASPM	-0.532551	4.26673	0.0264292	-2.69328	0.0492036	FALSE	-	FALSE	-	FALSE	-
hsa-miR-192*	MIMAT0004543	ASPM	-0.664333	4.26673	0.0264292	-2.59251	0.0496439	FALSE	-	FALSE	-	FALSE	-
hsa-miR-29c*	MIMAT0004673	ASPM	-0.60725	4.26673	0.0264292	-2.48117	0.0315166	FALSE	-	FALSE	-	FALSE	-
hsa-miR-22	MIMAT0000077	ASPM	-0.648551	4.26673	0.0264292	-2.15966	0.0040731	FALSE	-	FALSE	-	FALSE	-
hsa-miR-342-3p	MIMAT0000753	ASS1	-0.506636	-4.69359	4.33e-08	2.3406	0.0190592	FALSE	-	FALSE	-	FALSE	-
hsa-miR-130b	MIMAT0000691	ASS1	-0.589604	-4.69359	4.33e-08	3.80083	0.00520967	FALSE	-	FALSE	-	FALSE	-
hsa-miR-483-3p	MIMAT0002173	ASS1	-0.649935	-4.69359	4.33e-08	8.10918	0.0126338	FALSE	-	FALSE	-	FALSE	-
hsa-miR-30a	MIMAT0000087	ATAD2	-0.518889	2.41208	0.0112784	-16.9463	7.4e-12	TRUE	miRanda,Targetscan	FALSE	-	FALSE	-
hsa-miR-30c-2*	MIMAT0004550	ATAD2	-0.577015	2.41208	0.0112784	-7.05949	0.000128821	TRUE	miRanda	FALSE	-	FALSE	-
hsa-miR-362-3p	MIMAT0004683	ATAD2	-0.509981	2.41208	0.0112784	-3.80364	0.00120223	TRUE	miRanda,Targetscan	FALSE	-	FALSE	-
hsa-miR-200b*	MIMAT0004571	ATAD2	-0.518465	2.41208	0.0112784	-3.1324	0.0190592	TRUE	miRanda,miRWalk	FALSE	-	FALSE	-
hsa-miR-194	MIMAT0000460	ATAD2	-0.563084	2.41208	0.0112784	-46.2178	9.52e-10	FALSE	-	FALSE	-	FALSE	-
hsa-miR-204	MIMAT0000265	ATAD2	-0.642236	2.41208	0.0112784	-36.81	0.00154679	FALSE	-	FALSE	-	FALSE	-
hsa-miR-30a*	MIMAT0000088	ATAD2	-0.611999	2.41208	0.0112784	-18.8146	0.00022834	FALSE	-	FALSE	-	FALSE	-
hsa-miR-514	MIMAT0002883	ATAD2	-0.640601	2.41208	0.0112784	-9.56105	0.0315166	FALSE	-	FALSE	-	FALSE	-
hsa-miR-29c	MIMAT0000681	ATAD2	-0.783158	2.41208	0.0112784	-6.41599	7.63e-10	FALSE	-	FALSE	-	FALSE	-
hsa-miR-29b	MIMAT0000100	ATAD2	-0.762751	2.41208	0.0112784	-6.05381	1.53e-09	FALSE	-	FALSE	-	FALSE	-
hsa-miR-502-3p	MIMAT0004775	ATAD2	-0.593113	2.41208	0.0112784	-3.83844	0.0195059	FALSE	-	FALSE	-	FALSE	-
hsa-miR-184	MIMAT0000454	ATAD2	-0.58357	2.41208	0.0112784	-3.77856	0.0471754	FALSE	-	FALSE	-	FALSE	-
hsa-miR-29a	MIMAT0000086	ATAD2	-0.765294	2.41208	0.0112784	-3.59987	1.48e-05	FALSE	-	FALSE	-	FALSE	-
hsa-miR-650	MIMAT0003320	ATAD2	-0.529204	2.41208	0.0112784	-2.82359	0.000641415	FALSE	-	FALSE	-	FALSE	-
hsa-miR-192*	MIMAT0004543	ATAD2	-0.700113	2.41208	0.0112784	-2.59251	0.0496439	FALSE	-	FALSE	-	FALSE	-
hsa-miR-29c*	MIMAT0004673	ATAD2	-0.657087	2.41208	0.0112784	-2.48117	0.0315166	FALSE	-	FALSE	-	FALSE	-
hsa-miR-3619	MIMAT0017999	ATAD2	-0.507894	2.41208	0.0112784	-2.22165	7.57e-06	FALSE	-	FALSE	-	FALSE	-
hsa-miR-22*	MIMAT0004495	ATAD2	-0.568772	2.41208	0.0112784	-2.18871	3.33e-06	FALSE	-	FALSE	-	FALSE	-
hsa-miR-22	MIMAT0000077	ATAD2	-0.657414	2.41208	0.0112784	-2.15966	0.0040731	FALSE	-	FALSE	-	FALSE	-
hsa-miR-200a	MIMAT0000682	ATAD5	-0.574447	2.44525	9.48e-05	-46.4655	2.79e-13	TRUE	miRanda	FALSE	-	FALSE	-
hsa-miR-200b	MIMAT0000318	ATAD5	-0.566092	2.44525	9.48e-05	-35.3775	3.1e-06	TRUE	miRanda	FALSE	-	FALSE	-
hsa-miR-141	MIMAT0000432	ATAD5	-0.503626	2.44525	9.48e-05	-31.9336	0.000951205	TRUE	miRanda	FALSE	-	FALSE	-
hsa-miR-429	MIMAT0001536	ATAD5	-0.588746	2.44525	9.48e-05	-28.4646	9.52e-10	TRUE	miRanda	FALSE	-	FALSE	-
hsa-miR-30a	MIMAT0000087	ATAD5	-0.648833	2.44525	9.48e-05	-16.9463	7.4e-12	TRUE	miRanda	FALSE	-	FALSE	-
hsa-miR-30c	MIMAT0000244	ATAD5	-0.645402	2.44525	9.48e-05	-7.00515	8.66e-09	TRUE	miRanda	FALSE	-	FALSE	-
hsa-miR-30d	MIMAT0000245	ATAD5	-0.665214	2.44525	9.48e-05	-4.08877	0.0040731	TRUE	miRanda	FALSE	-	FALSE	-
hsa-miR-30e	MIMAT0000692	ATAD5	-0.50235	2.44525	9.48e-05	-3.67906	0.000527046	TRUE	miRanda	FALSE	-	FALSE	-
hsa-miR-192*	MIMAT0004543	ATAD5	-0.725131	2.44525	9.48e-05	-2.59251	0.0496439	TRUE	miRanda	FALSE	-	FALSE	-
hsa-miR-194	MIMAT0000460	ATAD5	-0.708825	2.44525	9.48e-05	-46.2178	9.52e-10	FALSE	-	FALSE	-	FALSE	-
hsa-miR-204	MIMAT0000265	ATAD5	-0.726108	2.44525	9.48e-05	-36.81	0.00154679	FALSE	-	FALSE	-	FALSE	-
hsa-miR-30a*	MIMAT0000088	ATAD5	-0.715989	2.44525	9.48e-05	-18.8146	0.00022834	FALSE	-	FALSE	-	FALSE	-
hsa-miR-514	MIMAT0002883	ATAD5	-0.670764	2.44525	9.48e-05	-9.56105	0.0315166	FALSE	-	FALSE	-	FALSE	-
hsa-miR-30c-2*	MIMAT0004550	ATAD5	-0.619987	2.44525	9.48e-05	-7.05949	0.000128821	FALSE	-	FALSE	-	FALSE	-
hsa-miR-29c	MIMAT0000681	ATAD5	-0.641794	2.44525	9.48e-05	-6.41599	7.63e-10	FALSE	-	FALSE	-	FALSE	-
hsa-miR-30e*	MIMAT0000693	ATAD5	-0.526774	2.44525	9.48e-05	-6.40949	2.86e-08	FALSE	-	FALSE	-	FALSE	-
hsa-miR-138	MIMAT0000430	ATAD5	-0.520922	2.44525	9.48e-05	-6.09319	0.0393204	FALSE	-	FALSE	-	FALSE	-
hsa-miR-532-3p	MIMAT0004780	ATAD5	-0.577606	2.44525	9.48e-05	-5.3682	0.00494485	FALSE	-	FALSE	-	FALSE	-
hsa-miR-532-5p	MIMAT0002888	ATAD5	-0.519293	2.44525	9.48e-05	-4.15879	0.000754552	FALSE	-	FALSE	-	FALSE	-
hsa-miR-4313	MIMAT0016865	ATAD5	-0.584843	2.44525	9.48e-05	-3.83928	0.0433536	FALSE	-	FALSE	-	FALSE	-
hsa-miR-502-3p	MIMAT0004775	ATAD5	-0.62613	2.44525	9.48e-05	-3.83844	0.0195059	FALSE	-	FALSE	-	FALSE	-
hsa-miR-362-5p	MIMAT0000705	ATAD5	-0.563693	2.44525	9.48e-05	-3.72617	0.0195059	FALSE	-	FALSE	-	FALSE	-
hsa-miR-29a	MIMAT0000086	ATAD5	-0.576529	2.44525	9.48e-05	-3.59987	1.48e-05	FALSE	-	FALSE	-	FALSE	-
hsa-miR-650	MIMAT0003320	ATAD5	-0.598139	2.44525	9.48e-05	-2.82359	0.000641415	FALSE	-	FALSE	-	FALSE	-
hsa-miR-500a*	MIMAT0002871	ATAD5	-0.554712	2.44525	9.48e-05	-2.69328	0.0492036	FALSE	-	FALSE	-	FALSE	-
hsa-miR-363	MIMAT0000707	ATAD5	-0.502614	2.44525	9.48e-05	-2.52828	0.0236749	FALSE	-	FALSE	-	FALSE	-
hsa-miR-455-5p	MIMAT0003150	ATAD5	-0.510427	2.44525	9.48e-05	-2.36193	0.012181	FALSE	-	FALSE	-	FALSE	-
hsa-miR-665	MIMAT0004952	ATAD5	-0.566577	2.44525	9.48e-05	-2.17957	0.0468347	FALSE	-	FALSE	-	FALSE	-
hsa-miR-193b	MIMAT0002819	ATAD5	-0.620308	2.44525	9.48e-05	-2.11453	7.87e-05	FALSE	-	FALSE	-	FALSE	-
hsa-miR-342-3p	MIMAT0000753	ATP12A	-0.587037	-5.89958	2.99e-06	2.3406	0.0190592	FALSE	-	FALSE	-	FALSE	-
hsa-miR-320e	MIMAT0015072	ATP12A	-0.531003	-5.89958	2.99e-06	2.96208	0.000298489	FALSE	-	FALSE	-	FALSE	-
hsa-miR-320d	MIMAT0006764	ATP12A	-0.5275	-5.89958	2.99e-06	3.33924	0.000298489	FALSE	-	FALSE	-	FALSE	-
hsa-miR-320c	MIMAT0005793	ATP12A	-0.549776	-5.89958	2.99e-06	3.59274	3.56e-09	FALSE	-	FALSE	-	FALSE	-
hsa-miR-483-3p	MIMAT0002173	ATP12A	-0.532429	-5.89958	2.99e-06	8.10918	0.0126338	FALSE	-	FALSE	-	FALSE	-
hsa-miR-342-3p	MIMAT0000753	ATP1A1	-0.645503	-3.26198	8.18e-09	2.3406	0.0190592	FALSE	-	FALSE	-	FALSE	-
hsa-miR-320e	MIMAT0015072	ATP1A1	-0.535155	-3.26198	8.18e-09	2.96208	0.000298489	FALSE	-	FALSE	-	FALSE	-
hsa-miR-320d	MIMAT0006764	ATP1A1	-0.565218	-3.26198	8.18e-09	3.33924	0.000298489	FALSE	-	FALSE	-	FALSE	-
hsa-miR-130b	MIMAT0000691	ATP1A1	-0.569367	-3.26198	8.18e-09	3.80083	0.00520967	FALSE	-	FALSE	-	FALSE	-
hsa-miR-199b-5p	MIMAT0000263	ATP1A1	-0.680319	-3.26198	8.18e-09	4.57993	0.00988295	FALSE	-	FALSE	-	FALSE	-
hsa-miR-34b*	MIMAT0000685	ATP1A4	-0.577307	-3.24149	0.00124818	2.25678	0.0363362	FALSE	-	FALSE	-	FALSE	-
hsa-miR-382	MIMAT0000737	ATP1A4	-0.520937	-3.24149	0.00124818	2.51265	0.000951205	FALSE	-	FALSE	-	FALSE	-
hsa-miR-199b-5p	MIMAT0000263	ATP1A4	-0.648055	-3.24149	0.00124818	4.57993	0.00988295	FALSE	-	FALSE	-	FALSE	-
hsa-miR-34a	MIMAT0000255	ATP1A4	-0.645464	-3.24149	0.00124818	5.47031	0.0483291	FALSE	-	FALSE	-	FALSE	-
hsa-miR-320d	MIMAT0006764	ATP1B1	-0.624707	-4.20105	4.65e-07	3.33924	0.000298489	TRUE	miRanda	FALSE	-	FALSE	-
hsa-miR-320c	MIMAT0005793	ATP1B1	-0.601199	-4.20105	4.65e-07	3.59274	3.56e-09	TRUE	miRanda	FALSE	-	FALSE	-
hsa-miR-130b	MIMAT0000691	ATP1B1	-0.510712	-4.20105	4.65e-07	3.80083	0.00520967	TRUE	miRanda	FALSE	-	FALSE	-
hsa-miR-320e	MIMAT0015072	ATP1B1	-0.627508	-4.20105	4.65e-07	2.96208	0.000298489	FALSE	-	FALSE	-	FALSE	-
hsa-miR-483-3p	MIMAT0002173	ATP1B1	-0.569688	-4.20105	4.65e-07	8.10918	0.0126338	FALSE	-	FALSE	-	FALSE	-
hsa-miR-320e	MIMAT0015072	ATP2C2	-0.607699	-2.3606	0.0096182	2.96208	0.000298489	FALSE	-	FALSE	-	FALSE	-
hsa-miR-320d	MIMAT0006764	ATP2C2	-0.588377	-2.3606	0.0096182	3.33924	0.000298489	FALSE	-	FALSE	-	FALSE	-
hsa-miR-320c	MIMAT0005793	ATP2C2	-0.555383	-2.3606	0.0096182	3.59274	3.56e-09	FALSE	-	FALSE	-	FALSE	-
hsa-miR-342-3p	MIMAT0000753	ATP6	-0.514934	-2.16229	6.42e-07	2.3406	0.0190592	FALSE	-	FALSE	-	FALSE	-
hsa-miR-199b-5p	MIMAT0000263	ATP6	-0.520262	-2.16229	6.42e-07	4.57993	0.00988295	FALSE	-	FALSE	-	FALSE	-
hsa-miR-342-3p	MIMAT0000753	ATP6V0A4	-0.567019	-8.96448	2.28e-13	2.3406	0.0190592	FALSE	-	FALSE	-	FALSE	-
hsa-miR-320e	MIMAT0015072	ATP6V0A4	-0.506995	-8.96448	2.28e-13	2.96208	0.000298489	FALSE	-	FALSE	-	FALSE	-
hsa-miR-320d	MIMAT0006764	ATP6V0A4	-0.506213	-8.96448	2.28e-13	3.33924	0.000298489	FALSE	-	FALSE	-	FALSE	-
hsa-miR-483-3p	MIMAT0002173	ATP6V0A4	-0.539002	-8.96448	2.28e-13	8.10918	0.0126338	FALSE	-	FALSE	-	FALSE	-
hsa-miR-149	MIMAT0000450	ATP6V0D2	-0.548069	-5.35295	6.86e-07	2.291	0.0120225	FALSE	-	FALSE	-	FALSE	-
hsa-miR-342-3p	MIMAT0000753	ATP6V0D2	-0.605134	-5.35295	6.86e-07	2.3406	0.0190592	FALSE	-	FALSE	-	FALSE	-
hsa-miR-130b	MIMAT0000691	ATP6V0D2	-0.555949	-5.35295	6.86e-07	3.80083	0.00520967	FALSE	-	FALSE	-	FALSE	-
hsa-miR-483-3p	MIMAT0002173	ATP6V0D2	-0.520265	-5.35295	6.86e-07	8.10918	0.0126338	FALSE	-	FALSE	-	FALSE	-
hsa-miR-34b*	MIMAT0000685	ATP6V1B1	-0.526761	-5.68959	1.05e-06	2.25678	0.0363362	FALSE	-	FALSE	-	FALSE	-
hsa-miR-34a	MIMAT0000255	ATP6V1B1	-0.572523	-5.68959	1.05e-06	5.47031	0.0483291	FALSE	-	FALSE	-	FALSE	-
hsa-miR-149	MIMAT0000450	ATP6V1G3	-0.519848	-8.31325	8.48e-10	2.291	0.0120225	TRUE	miRanda	FALSE	-	FALSE	-
hsa-miR-342-3p	MIMAT0000753	ATP6V1G3	-0.603692	-8.31325	8.48e-10	2.3406	0.0190592	TRUE	miRanda,miRWalk,Targetscan	FALSE	-	FALSE	-
hsa-miR-130b	MIMAT0000691	ATP6V1G3	-0.571726	-8.31325	8.48e-10	3.80083	0.00520967	FALSE	-	FALSE	-	FALSE	-
hsa-miR-483-3p	MIMAT0002173	ATP6V1G3	-0.595277	-8.31325	8.48e-10	8.10918	0.0126338	FALSE	-	FALSE	-	FALSE	-
hsa-miR-149	MIMAT0000450	ATP8	-0.511166	-2.48028	4.06e-08	2.291	0.0120225	FALSE	-	FALSE	-	FALSE	-
hsa-miR-342-3p	MIMAT0000753	ATP8	-0.677867	-2.48028	4.06e-08	2.3406	0.0190592	FALSE	-	FALSE	-	FALSE	-
hsa-miR-199b-5p	MIMAT0000263	ATP8	-0.516957	-2.48028	4.06e-08	4.57993	0.00988295	FALSE	-	FALSE	-	FALSE	-
hsa-miR-149	MIMAT0000450	AVPR1A	-0.647141	-4.34503	0.00964998	2.291	0.0120225	TRUE	Targetscan	FALSE	-	FALSE	-
hsa-miR-342-3p	MIMAT0000753	AVPR1A	-0.682392	-4.34503	0.00964998	2.3406	0.0190592	FALSE	-	FALSE	-	FALSE	-
hsa-miR-130b	MIMAT0000691	AVPR1A	-0.611584	-4.34503	0.00964998	3.80083	0.00520967	FALSE	-	FALSE	-	FALSE	-
hsa-miR-483-3p	MIMAT0002173	AVPR1A	-0.58846	-4.34503	0.00964998	8.10918	0.0126338	FALSE	-	FALSE	-	FALSE	-
hsa-miR-483-3p	MIMAT0002173	AVPR2	-0.551213	-4.32054	0.0179001	8.10918	0.0126338	TRUE	miRanda,miRWalk,Targetscan	FALSE	-	FALSE	-
hsa-miR-342-3p	MIMAT0000753	AVPR2	-0.633623	-4.32054	0.0179001	2.3406	0.0190592	FALSE	-	FALSE	-	FALSE	-
hsa-miR-130b	MIMAT0000691	AVPR2	-0.529348	-4.32054	0.0179001	3.80083	0.00520967	FALSE	-	FALSE	-	FALSE	-
hsa-miR-149	MIMAT0000450	AZGP1	-0.502559	-6.11013	3.73e-13	2.291	0.0120225	FALSE	-	FALSE	-	FALSE	-
hsa-miR-342-3p	MIMAT0000753	AZGP1	-0.72991	-6.11013	3.73e-13	2.3406	0.0190592	FALSE	-	FALSE	-	FALSE	-
hsa-miR-320d	MIMAT0006764	AZGP1	-0.516349	-6.11013	3.73e-13	3.33924	0.000298489	FALSE	-	FALSE	-	FALSE	-
hsa-miR-130b	MIMAT0000691	AZGP1	-0.530131	-6.11013	3.73e-13	3.80083	0.00520967	FALSE	-	FALSE	-	FALSE	-
hsa-miR-29b	MIMAT0000100	B3GAT1	-0.557444	2.36966	0.0102873	-6.05381	1.53e-09	TRUE	miRanda,miRWalk,Targetscan	FALSE	-	FALSE	-
hsa-miR-29a	MIMAT0000086	B3GAT1	-0.635488	2.36966	0.0102873	-3.59987	1.48e-05	TRUE	miRanda,miRWalk,Targetscan	FALSE	-	FALSE	-
hsa-miR-22*	MIMAT0004495	B3GAT1	-0.516768	2.36966	0.0102873	-2.18871	3.33e-06	TRUE	miRanda	FALSE	-	FALSE	-
hsa-miR-22	MIMAT0000077	B3GAT1	-0.722493	2.36966	0.0102873	-2.15966	0.0040731	TRUE	miRanda,miRWalk,Targetscan	FALSE	-	FALSE	-
hsa-miR-22	MIMAT0000077	B4GALNT4	-0.622803	4.36835	3.21e-07	-2.15966	0.0040731	TRUE	miRanda,miRWalk	FALSE	-	FALSE	-
hsa-miR-514	MIMAT0002883	B4GALNT4	-0.595889	4.36835	3.21e-07	-9.56105	0.0315166	FALSE	-	FALSE	-	FALSE	-
hsa-miR-29c	MIMAT0000681	B4GALNT4	-0.597508	4.36835	3.21e-07	-6.41599	7.63e-10	FALSE	-	FALSE	-	FALSE	-
hsa-miR-29b	MIMAT0000100	B4GALNT4	-0.679004	4.36835	3.21e-07	-6.05381	1.53e-09	FALSE	-	FALSE	-	FALSE	-
hsa-miR-4313	MIMAT0016865	B4GALNT4	-0.586565	4.36835	3.21e-07	-3.83928	0.0433536	FALSE	-	FALSE	-	FALSE	-
hsa-miR-29a	MIMAT0000086	B4GALNT4	-0.660419	4.36835	3.21e-07	-3.59987	1.48e-05	FALSE	-	FALSE	-	FALSE	-
hsa-miR-192*	MIMAT0004543	B4GALNT4	-0.516499	4.36835	3.21e-07	-2.59251	0.0496439	FALSE	-	FALSE	-	FALSE	-
hsa-miR-3619	MIMAT0017999	B4GALNT4	-0.504889	4.36835	3.21e-07	-2.22165	7.57e-06	FALSE	-	FALSE	-	FALSE	-
hsa-miR-514	MIMAT0002883	BAI2	-0.560964	2.04607	0.00137531	-9.56105	0.0315166	FALSE	-	FALSE	-	FALSE	-
hsa-miR-29c	MIMAT0000681	BAI2	-0.540504	2.04607	0.00137531	-6.41599	7.63e-10	FALSE	-	FALSE	-	FALSE	-
hsa-miR-29b	MIMAT0000100	BAI2	-0.63042	2.04607	0.00137531	-6.05381	1.53e-09	FALSE	-	FALSE	-	FALSE	-
hsa-miR-4313	MIMAT0016865	BAI2	-0.622803	2.04607	0.00137531	-3.83928	0.0433536	FALSE	-	FALSE	-	FALSE	-
hsa-miR-29a	MIMAT0000086	BAI2	-0.586732	2.04607	0.00137531	-3.59987	1.48e-05	FALSE	-	FALSE	-	FALSE	-
hsa-miR-650	MIMAT0003320	BAI2	-0.531127	2.04607	0.00137531	-2.82359	0.000641415	FALSE	-	FALSE	-	FALSE	-
hsa-miR-22	MIMAT0000077	BAI2	-0.523793	2.04607	0.00137531	-2.15966	0.0040731	FALSE	-	FALSE	-	FALSE	-
hsa-miR-149	MIMAT0000450	BAIAP2L2	-0.526192	-2.17923	0.00130379	2.291	0.0120225	FALSE	-	FALSE	-	FALSE	-
hsa-miR-342-3p	MIMAT0000753	BAIAP2L2	-0.739874	-2.17923	0.00130379	2.3406	0.0190592	FALSE	-	FALSE	-	FALSE	-
hsa-miR-320e	MIMAT0015072	BAIAP2L2	-0.519121	-2.17923	0.00130379	2.96208	0.000298489	FALSE	-	FALSE	-	FALSE	-
hsa-miR-320d	MIMAT0006764	BAIAP2L2	-0.57399	-2.17923	0.00130379	3.33924	0.000298489	FALSE	-	FALSE	-	FALSE	-
hsa-miR-382	MIMAT0000737	BAIAP3	-0.528942	-2.07257	0.000235968	2.51265	0.000951205	TRUE	miRanda	FALSE	-	FALSE	-
hsa-miR-34a	MIMAT0000255	BAIAP3	-0.518298	-2.07257	0.000235968	5.47031	0.0483291	FALSE	-	FALSE	-	FALSE	-
hsa-miR-3619	MIMAT0017999	BARX1	-0.578388	3.27974	1.13e-05	-2.22165	7.57e-06	FALSE	-	FALSE	-	FALSE	-
hsa-miR-22	MIMAT0000077	BARX1	-0.623421	3.27974	1.13e-05	-2.15966	0.0040731	FALSE	-	FALSE	-	FALSE	-
hsa-miR-204	MIMAT0000265	BASP1	-0.554533	2.64153	0.00201361	-36.81	0.00154679	TRUE	miRanda	FALSE	-	FALSE	-
hsa-miR-200b	MIMAT0000318	BASP1	-0.579944	2.64153	0.00201361	-35.3775	3.1e-06	TRUE	miRanda,miRWalk,RNA22,Targetscan	FALSE	-	FALSE	-
hsa-miR-429	MIMAT0001536	BASP1	-0.636472	2.64153	0.00201361	-28.4646	9.52e-10	TRUE	miRanda,miRWalk,Targetscan	FALSE	-	FALSE	-
hsa-miR-200c	MIMAT0000617	BASP1	-0.602847	2.64153	0.00201361	-21.4575	7.21e-07	TRUE	miRanda,miRWalk,Targetscan	FALSE	-	FALSE	-
hsa-miR-30a*	MIMAT0000088	BASP1	-0.620375	2.64153	0.00201361	-18.8146	0.00022834	TRUE	miRanda,miRWalk	FALSE	-	FALSE	-
hsa-miR-514	MIMAT0002883	BASP1	-0.607208	2.64153	0.00201361	-9.56105	0.0315166	TRUE	miRanda	FALSE	-	FALSE	-
hsa-miR-30e*	MIMAT0000693	BASP1	-0.595186	2.64153	0.00201361	-6.40949	2.86e-08	TRUE	miRanda,miRWalk	FALSE	-	FALSE	-
hsa-miR-532-3p	MIMAT0004780	BASP1	-0.535973	2.64153	0.00201361	-5.3682	0.00494485	TRUE	miRanda,miRWalk,Targetscan	FALSE	-	FALSE	-
hsa-miR-509-3-5p	MIMAT0004975	BASP1	-0.558884	2.64153	0.00201361	-2.88187	0.0368071	TRUE	miRanda,miRWalk,Targetscan	FALSE	-	FALSE	-
hsa-miR-509-5p	MIMAT0004779	BASP1	-0.583616	2.64153	0.00201361	-2.87305	0.0406154	TRUE	miRanda,miRWalk,Targetscan	FALSE	-	FALSE	-
hsa-miR-363	MIMAT0000707	BASP1	-0.511324	2.64153	0.00201361	-2.52828	0.0236749	TRUE	miRanda	FALSE	-	FALSE	-
hsa-miR-200a	MIMAT0000682	BASP1	-0.595775	2.64153	0.00201361	-46.4655	2.79e-13	FALSE	-	FALSE	-	FALSE	-
hsa-miR-194	MIMAT0000460	BASP1	-0.689294	2.64153	0.00201361	-46.2178	9.52e-10	FALSE	-	FALSE	-	FALSE	-
hsa-miR-141	MIMAT0000432	BASP1	-0.639155	2.64153	0.00201361	-31.9336	0.000951205	FALSE	-	FALSE	-	FALSE	-
hsa-miR-192	MIMAT0000222	BASP1	-0.684279	2.64153	0.00201361	-28.5527	0.00455468	FALSE	-	FALSE	-	FALSE	-
hsa-miR-30a	MIMAT0000087	BASP1	-0.575395	2.64153	0.00201361	-16.9463	7.4e-12	FALSE	-	FALSE	-	FALSE	-
hsa-miR-30c-2*	MIMAT0004550	BASP1	-0.593212	2.64153	0.00201361	-7.05949	0.000128821	FALSE	-	FALSE	-	FALSE	-
hsa-miR-30c	MIMAT0000244	BASP1	-0.643264	2.64153	0.00201361	-7.00515	8.66e-09	FALSE	-	FALSE	-	FALSE	-
hsa-miR-138	MIMAT0000430	BASP1	-0.600296	2.64153	0.00201361	-6.09319	0.0393204	FALSE	-	FALSE	-	FALSE	-
hsa-miR-30b	MIMAT0000420	BASP1	-0.56058	2.64153	0.00201361	-5.18561	2.83e-06	FALSE	-	FALSE	-	FALSE	-
hsa-miR-532-5p	MIMAT0002888	BASP1	-0.517556	2.64153	0.00201361	-4.15879	0.000754552	FALSE	-	FALSE	-	FALSE	-
hsa-miR-30d	MIMAT0000245	BASP1	-0.59574	2.64153	0.00201361	-4.08877	0.0040731	FALSE	-	FALSE	-	FALSE	-
hsa-miR-362-3p	MIMAT0004683	BASP1	-0.509811	2.64153	0.00201361	-3.80364	0.00120223	FALSE	-	FALSE	-	FALSE	-
hsa-miR-184	MIMAT0000454	BASP1	-0.522125	2.64153	0.00201361	-3.77856	0.0471754	FALSE	-	FALSE	-	FALSE	-
hsa-miR-362-5p	MIMAT0000705	BASP1	-0.558798	2.64153	0.00201361	-3.72617	0.0195059	FALSE	-	FALSE	-	FALSE	-
hsa-miR-30e	MIMAT0000692	BASP1	-0.539574	2.64153	0.00201361	-3.67906	0.000527046	FALSE	-	FALSE	-	FALSE	-
hsa-miR-200b*	MIMAT0004571	BASP1	-0.530002	2.64153	0.00201361	-3.1324	0.0190592	FALSE	-	FALSE	-	FALSE	-
hsa-miR-192*	MIMAT0004543	BASP1	-0.628124	2.64153	0.00201361	-2.59251	0.0496439	FALSE	-	FALSE	-	FALSE	-
hsa-miR-455-5p	MIMAT0003150	BASP1	-0.577273	2.64153	0.00201361	-2.36193	0.012181	FALSE	-	FALSE	-	FALSE	-
hsa-miR-4280	MIMAT0016911	BASP1	-0.581703	2.64153	0.00201361	-2.08514	0.00616155	FALSE	-	FALSE	-	FALSE	-
hsa-miR-342-3p	MIMAT0000753	BBOX1	-0.588013	-8.25954	1.86e-12	2.3406	0.0190592	TRUE	miRanda,miRWalk,Targetscan	FALSE	-	FALSE	-
hsa-miR-199b-5p	MIMAT0000263	BBOX1	-0.513929	-8.25954	1.86e-12	4.57993	0.00988295	FALSE	-	FALSE	-	FALSE	-
hsa-miR-483-3p	MIMAT0002173	BBOX1	-0.568797	-8.25954	1.86e-12	8.10918	0.0126338	FALSE	-	FALSE	-	FALSE	-
hsa-miR-595	MIMAT0003263	BCAM	-0.513957	-2.32284	2.92e-07	2.56618	0.000369323	FALSE	-	FALSE	-	FALSE	-
hsa-miR-320c	MIMAT0005793	BCAM	-0.508133	-2.32284	2.92e-07	3.59274	3.56e-09	FALSE	-	FALSE	-	FALSE	-
hsa-miR-4270	MIMAT0016900	BCL2L10	-0.502372	-2.49675	0.00379767	3.25387	7.35e-05	FALSE	-	FALSE	-	FALSE	-
hsa-miR-206	MIMAT0000462	BDH1	-0.565822	-2.61283	0.00228818	2.14193	0.00699125	TRUE	miRanda,miRWalk,Targetscan	FALSE	-	FALSE	-
hsa-miR-34b*	MIMAT0000685	BDH1	-0.51668	-2.61283	0.00228818	2.25678	0.0363362	TRUE	miRanda	FALSE	-	FALSE	-
hsa-miR-199b-5p	MIMAT0000263	BDH1	-0.639808	-2.61283	0.00228818	4.57993	0.00988295	TRUE	miRanda	FALSE	-	FALSE	-
hsa-miR-34a	MIMAT0000255	BDH1	-0.665249	-2.61283	0.00228818	5.47031	0.0483291	TRUE	miRanda,Targetscan	FALSE	-	FALSE	-
hsa-miR-382	MIMAT0000737	BDH1	-0.694851	-2.61283	0.00228818	2.51265	0.000951205	FALSE	-	FALSE	-	FALSE	-
hsa-miR-342-3p	MIMAT0000753	BDKRB1	-0.598857	-3.10189	0.000684602	2.3406	0.0190592	FALSE	-	FALSE	-	FALSE	-
hsa-miR-149	MIMAT0000450	BDKRB2	-0.655659	-3.81496	0.000459724	2.291	0.0120225	TRUE	miRanda,miRWalk,RNA22,Targetscan	FALSE	-	FALSE	-
hsa-miR-342-3p	MIMAT0000753	BDKRB2	-0.642312	-3.81496	0.000459724	2.3406	0.0190592	TRUE	miRanda,Targetscan	FALSE	-	FALSE	-
hsa-miR-483-3p	MIMAT0002173	BDKRB2	-0.686706	-3.81496	0.000459724	8.10918	0.0126338	TRUE	miRanda,miRWalk,Targetscan	FALSE	-	FALSE	-
hsa-miR-130b	MIMAT0000691	BDKRB2	-0.683631	-3.81496	0.000459724	3.80083	0.00520967	FALSE	-	FALSE	-	FALSE	-
hsa-miR-382	MIMAT0000737	BEX5	-0.682012	-2.29726	0.00237552	2.51265	0.000951205	TRUE	miRanda	FALSE	-	FALSE	-
hsa-miR-1207-5p	MIMAT0005871	BEX5	-0.504105	-2.29726	0.00237552	5.1752	0.00144797	TRUE	miRanda	FALSE	-	FALSE	-
hsa-miR-206	MIMAT0000462	BEX5	-0.610738	-2.29726	0.00237552	2.14193	0.00699125	FALSE	-	FALSE	-	FALSE	-
hsa-miR-638	MIMAT0003308	BEX5	-0.558747	-2.29726	0.00237552	2.46194	0.00455468	FALSE	-	FALSE	-	FALSE	-
hsa-miR-4270	MIMAT0016900	BEX5	-0.543317	-2.29726	0.00237552	3.25387	7.35e-05	FALSE	-	FALSE	-	FALSE	-
hsa-miR-1225-5p	MIMAT0005572	BEX5	-0.559311	-2.29726	0.00237552	3.50426	9.16e-06	FALSE	-	FALSE	-	FALSE	-
hsa-miR-194	MIMAT0000460	BHLHE22	-0.500225	2.28767	0.000567848	-46.2178	9.52e-10	FALSE	-	FALSE	-	FALSE	-
hsa-miR-192	MIMAT0000222	BHLHE22	-0.522072	2.28767	0.000567848	-28.5527	0.00455468	FALSE	-	FALSE	-	FALSE	-
hsa-miR-30c	MIMAT0000244	BHLHE22	-0.513192	2.28767	0.000567848	-7.00515	8.66e-09	FALSE	-	FALSE	-	FALSE	-
hsa-miR-30e*	MIMAT0000693	BHLHE22	-0.516971	2.28767	0.000567848	-6.40949	2.86e-08	FALSE	-	FALSE	-	FALSE	-
hsa-miR-149	MIMAT0000450	BHMT	-0.523066	-9.41567	2.76e-14	2.291	0.0120225	TRUE	miRanda,RNA22	FALSE	-	FALSE	-
hsa-miR-342-3p	MIMAT0000753	BHMT	-0.667465	-9.41567	2.76e-14	2.3406	0.0190592	FALSE	-	FALSE	-	FALSE	-
hsa-miR-130b	MIMAT0000691	BHMT	-0.572621	-9.41567	2.76e-14	3.80083	0.00520967	FALSE	-	FALSE	-	FALSE	-
hsa-miR-483-3p	MIMAT0002173	BHMT	-0.577533	-9.41567	2.76e-14	8.10918	0.0126338	FALSE	-	FALSE	-	FALSE	-
hsa-miR-130b	MIMAT0000691	BHMT2	-0.67363	-6.52667	1.57e-14	3.80083	0.00520967	TRUE	miRanda,miRWalk,Targetscan	FALSE	-	FALSE	-
hsa-miR-342-3p	MIMAT0000753	BHMT2	-0.639092	-6.52667	1.57e-14	2.3406	0.0190592	FALSE	-	FALSE	-	FALSE	-
hsa-miR-483-3p	MIMAT0002173	BHMT2	-0.597168	-6.52667	1.57e-14	8.10918	0.0126338	FALSE	-	FALSE	-	FALSE	-
hsa-miR-194	MIMAT0000460	BLM	-0.637232	3.58669	0.0148484	-46.2178	9.52e-10	TRUE	Targetscan	FALSE	-	FALSE	-
hsa-miR-200a	MIMAT0000682	BLM	-0.602757	3.58669	0.0148484	-46.4655	2.79e-13	FALSE	-	FALSE	-	FALSE	-
hsa-miR-204	MIMAT0000265	BLM	-0.799342	3.58669	0.0148484	-36.81	0.00154679	FALSE	-	FALSE	-	FALSE	-
hsa-miR-200b	MIMAT0000318	BLM	-0.592989	3.58669	0.0148484	-35.3775	3.1e-06	FALSE	-	FALSE	-	FALSE	-
hsa-miR-429	MIMAT0001536	BLM	-0.564882	3.58669	0.0148484	-28.4646	9.52e-10	FALSE	-	FALSE	-	FALSE	-
hsa-miR-30a*	MIMAT0000088	BLM	-0.769638	3.58669	0.0148484	-18.8146	0.00022834	FALSE	-	FALSE	-	FALSE	-
hsa-miR-30a	MIMAT0000087	BLM	-0.657828	3.58669	0.0148484	-16.9463	7.4e-12	FALSE	-	FALSE	-	FALSE	-
hsa-miR-514	MIMAT0002883	BLM	-0.699837	3.58669	0.0148484	-9.56105	0.0315166	FALSE	-	FALSE	-	FALSE	-
hsa-miR-30c-2*	MIMAT0004550	BLM	-0.640757	3.58669	0.0148484	-7.05949	0.000128821	FALSE	-	FALSE	-	FALSE	-
hsa-miR-30c	MIMAT0000244	BLM	-0.614552	3.58669	0.0148484	-7.00515	8.66e-09	FALSE	-	FALSE	-	FALSE	-
hsa-miR-29c	MIMAT0000681	BLM	-0.732945	3.58669	0.0148484	-6.41599	7.63e-10	FALSE	-	FALSE	-	FALSE	-
hsa-miR-30e*	MIMAT0000693	BLM	-0.548048	3.58669	0.0148484	-6.40949	2.86e-08	FALSE	-	FALSE	-	FALSE	-
hsa-miR-29b	MIMAT0000100	BLM	-0.641689	3.58669	0.0148484	-6.05381	1.53e-09	FALSE	-	FALSE	-	FALSE	-
hsa-miR-532-3p	MIMAT0004780	BLM	-0.574209	3.58669	0.0148484	-5.3682	0.00494485	FALSE	-	FALSE	-	FALSE	-
hsa-miR-532-5p	MIMAT0002888	BLM	-0.577598	3.58669	0.0148484	-4.15879	0.000754552	FALSE	-	FALSE	-	FALSE	-
hsa-miR-30d	MIMAT0000245	BLM	-0.588431	3.58669	0.0148484	-4.08877	0.0040731	FALSE	-	FALSE	-	FALSE	-
hsa-miR-502-3p	MIMAT0004775	BLM	-0.715301	3.58669	0.0148484	-3.83844	0.0195059	FALSE	-	FALSE	-	FALSE	-
hsa-miR-362-3p	MIMAT0004683	BLM	-0.575276	3.58669	0.0148484	-3.80364	0.00120223	FALSE	-	FALSE	-	FALSE	-
hsa-miR-184	MIMAT0000454	BLM	-0.530038	3.58669	0.0148484	-3.77856	0.0471754	FALSE	-	FALSE	-	FALSE	-
hsa-miR-362-5p	MIMAT0000705	BLM	-0.608931	3.58669	0.0148484	-3.72617	0.0195059	FALSE	-	FALSE	-	FALSE	-
hsa-miR-29a	MIMAT0000086	BLM	-0.718996	3.58669	0.0148484	-3.59987	1.48e-05	FALSE	-	FALSE	-	FALSE	-
hsa-miR-660	MIMAT0003338	BLM	-0.519886	3.58669	0.0148484	-3.1577	0.00404992	FALSE	-	FALSE	-	FALSE	-
hsa-miR-200b*	MIMAT0004571	BLM	-0.555372	3.58669	0.0148484	-3.1324	0.0190592	FALSE	-	FALSE	-	FALSE	-
hsa-miR-650	MIMAT0003320	BLM	-0.552981	3.58669	0.0148484	-2.82359	0.000641415	FALSE	-	FALSE	-	FALSE	-
hsa-miR-500a*	MIMAT0002871	BLM	-0.581779	3.58669	0.0148484	-2.69328	0.0492036	FALSE	-	FALSE	-	FALSE	-
hsa-miR-192*	MIMAT0004543	BLM	-0.766756	3.58669	0.0148484	-2.59251	0.0496439	FALSE	-	FALSE	-	FALSE	-
hsa-miR-29c*	MIMAT0004673	BLM	-0.653188	3.58669	0.0148484	-2.48117	0.0315166	FALSE	-	FALSE	-	FALSE	-
hsa-miR-455-5p	MIMAT0003150	BLM	-0.675968	3.58669	0.0148484	-2.36193	0.012181	FALSE	-	FALSE	-	FALSE	-
hsa-miR-145	MIMAT0000437	BLM	-0.53571	3.58669	0.0148484	-2.30911	0.000190459	FALSE	-	FALSE	-	FALSE	-
hsa-miR-22	MIMAT0000077	BLM	-0.57628	3.58669	0.0148484	-2.15966	0.0040731	FALSE	-	FALSE	-	FALSE	-
hsa-miR-149	MIMAT0000450	BLNK	-0.751817	-3.09135	5.7e-07	2.291	0.0120225	TRUE	RNA22	FALSE	-	FALSE	-
hsa-miR-342-3p	MIMAT0000753	BLNK	-0.558476	-3.09135	5.7e-07	2.3406	0.0190592	FALSE	-	FALSE	-	FALSE	-
hsa-miR-130b	MIMAT0000691	BLNK	-0.688518	-3.09135	5.7e-07	3.80083	0.00520967	FALSE	-	FALSE	-	FALSE	-
hsa-miR-483-3p	MIMAT0002173	BLNK	-0.709738	-3.09135	5.7e-07	8.10918	0.0126338	FALSE	-	FALSE	-	FALSE	-
hsa-miR-192	MIMAT0000222	BMP8A	-0.651259	2.48347	0.00602891	-28.5527	0.00455468	TRUE	miRanda	FALSE	-	FALSE	-
hsa-miR-514	MIMAT0002883	BMP8A	-0.506744	2.48347	0.00602891	-9.56105	0.0315166	TRUE	miRanda,miRWalk,RNA22	FALSE	-	FALSE	-
hsa-miR-30c-2*	MIMAT0004550	BMP8A	-0.581845	2.48347	0.00602891	-7.05949	0.000128821	TRUE	miRanda,miRWalk	FALSE	-	FALSE	-
hsa-miR-30e*	MIMAT0000693	BMP8A	-0.530973	2.48347	0.00602891	-6.40949	2.86e-08	TRUE	miRanda,miRWalk	FALSE	-	FALSE	-
hsa-miR-138	MIMAT0000430	BMP8A	-0.508338	2.48347	0.00602891	-6.09319	0.0393204	TRUE	miRanda,miRWalk,Targetscan	FALSE	-	FALSE	-
hsa-miR-192*	MIMAT0004543	BMP8A	-0.523671	2.48347	0.00602891	-2.59251	0.0496439	TRUE	miRanda	FALSE	-	FALSE	-
hsa-miR-194	MIMAT0000460	BMP8A	-0.732211	2.48347	0.00602891	-46.2178	9.52e-10	FALSE	-	FALSE	-	FALSE	-
hsa-miR-30c	MIMAT0000244	BMP8A	-0.529719	2.48347	0.00602891	-7.00515	8.66e-09	FALSE	-	FALSE	-	FALSE	-
hsa-miR-30b	MIMAT0000420	BMP8A	-0.552367	2.48347	0.00602891	-5.18561	2.83e-06	FALSE	-	FALSE	-	FALSE	-
hsa-miR-30d	MIMAT0000245	BMP8A	-0.513618	2.48347	0.00602891	-4.08877	0.0040731	FALSE	-	FALSE	-	FALSE	-
hsa-miR-30e	MIMAT0000692	BMP8A	-0.569137	2.48347	0.00602891	-3.67906	0.000527046	FALSE	-	FALSE	-	FALSE	-
hsa-miR-29b	MIMAT0000100	BMPER	-0.547487	3.21715	5.31e-05	-6.05381	1.53e-09	TRUE	Targetscan	FALSE	-	FALSE	-
hsa-miR-29a	MIMAT0000086	BMPER	-0.575583	3.21715	5.31e-05	-3.59987	1.48e-05	TRUE	Targetscan	FALSE	-	FALSE	-
hsa-miR-22	MIMAT0000077	BMPER	-0.561855	3.21715	5.31e-05	-2.15966	0.0040731	FALSE	-	FALSE	-	FALSE	-
hsa-miR-29c	MIMAT0000681	BOC	-0.702216	2.44903	0.00261623	-6.41599	7.63e-10	TRUE	miRanda,miRWalk,Targetscan	FALSE	-	FALSE	-
hsa-miR-29b	MIMAT0000100	BOC	-0.722751	2.44903	0.00261623	-6.05381	1.53e-09	TRUE	miRanda,miRWalk,RNA22,Targetscan	FALSE	-	FALSE	-
hsa-miR-29a	MIMAT0000086	BOC	-0.655542	2.44903	0.00261623	-3.59987	1.48e-05	TRUE	miRanda,miRWalk,RNA22,Targetscan	FALSE	-	FALSE	-
hsa-miR-192*	MIMAT0004543	BOC	-0.510312	2.44903	0.00261623	-2.59251	0.0496439	TRUE	miRanda	FALSE	-	FALSE	-
hsa-miR-514	MIMAT0002883	BOC	-0.526109	2.44903	0.00261623	-9.56105	0.0315166	FALSE	-	FALSE	-	FALSE	-
hsa-miR-184	MIMAT0000454	BOC	-0.511766	2.44903	0.00261623	-3.77856	0.0471754	FALSE	-	FALSE	-	FALSE	-
hsa-miR-29c*	MIMAT0004673	BOC	-0.564741	2.44903	0.00261623	-2.48117	0.0315166	FALSE	-	FALSE	-	FALSE	-
hsa-miR-30a*	MIMAT0000088	BRCA1	-0.581348	2.00407	0.00021325	-18.8146	0.00022834	TRUE	miRanda,miRWalk	FALSE	-	FALSE	-
hsa-miR-29c	MIMAT0000681	BRCA1	-0.681622	2.00407	0.00021325	-6.41599	7.63e-10	TRUE	miRWalk,Targetscan	FALSE	-	FALSE	-
hsa-miR-29b	MIMAT0000100	BRCA1	-0.706171	2.00407	0.00021325	-6.05381	1.53e-09	TRUE	miRWalk,Targetscan	FALSE	-	FALSE	-
hsa-miR-29a	MIMAT0000086	BRCA1	-0.741013	2.00407	0.00021325	-3.59987	1.48e-05	TRUE	miRWalk,Targetscan	FALSE	-	FALSE	-
hsa-miR-145	MIMAT0000437	BRCA1	-0.594817	2.00407	0.00021325	-2.30911	0.000190459	TRUE	miRanda	FALSE	-	FALSE	-
hsa-miR-22*	MIMAT0004495	BRCA1	-0.549466	2.00407	0.00021325	-2.18871	3.33e-06	TRUE	miRanda	FALSE	-	FALSE	-
hsa-miR-204	MIMAT0000265	BRCA1	-0.606551	2.00407	0.00021325	-36.81	0.00154679	FALSE	-	FALSE	-	FALSE	-
hsa-miR-514	MIMAT0002883	BRCA1	-0.548138	2.00407	0.00021325	-9.56105	0.0315166	FALSE	-	FALSE	-	FALSE	-
hsa-miR-502-3p	MIMAT0004775	BRCA1	-0.668054	2.00407	0.00021325	-3.83844	0.0195059	FALSE	-	FALSE	-	FALSE	-
hsa-miR-362-3p	MIMAT0004683	BRCA1	-0.506464	2.00407	0.00021325	-3.80364	0.00120223	FALSE	-	FALSE	-	FALSE	-
hsa-miR-362-5p	MIMAT0000705	BRCA1	-0.524089	2.00407	0.00021325	-3.72617	0.0195059	FALSE	-	FALSE	-	FALSE	-
hsa-miR-500a*	MIMAT0002871	BRCA1	-0.530749	2.00407	0.00021325	-2.69328	0.0492036	FALSE	-	FALSE	-	FALSE	-
hsa-miR-192*	MIMAT0004543	BRCA1	-0.572372	2.00407	0.00021325	-2.59251	0.0496439	FALSE	-	FALSE	-	FALSE	-
hsa-miR-29c*	MIMAT0004673	BRCA1	-0.548973	2.00407	0.00021325	-2.48117	0.0315166	FALSE	-	FALSE	-	FALSE	-
hsa-miR-455-5p	MIMAT0003150	BRCA1	-0.556218	2.00407	0.00021325	-2.36193	0.012181	FALSE	-	FALSE	-	FALSE	-
hsa-miR-22	MIMAT0000077	BRCA1	-0.694053	2.00407	0.00021325	-2.15966	0.0040731	FALSE	-	FALSE	-	FALSE	-
hsa-miR-204	MIMAT0000265	BRCA2	-0.776871	2.75604	0.00720042	-36.81	0.00154679	TRUE	miRanda	FALSE	-	FALSE	-
hsa-miR-200b	MIMAT0000318	BRCA2	-0.640376	2.75604	0.00720042	-35.3775	3.1e-06	TRUE	miRWalk,Targetscan	FALSE	-	FALSE	-
hsa-miR-429	MIMAT0001536	BRCA2	-0.69713	2.75604	0.00720042	-28.4646	9.52e-10	TRUE	miRanda,miRWalk,Targetscan	FALSE	-	FALSE	-
hsa-miR-200c	MIMAT0000617	BRCA2	-0.601393	2.75604	0.00720042	-21.4575	7.21e-07	TRUE	miRanda,miRWalk,Targetscan	FALSE	-	FALSE	-
hsa-miR-30a*	MIMAT0000088	BRCA2	-0.810607	2.75604	0.00720042	-18.8146	0.00022834	TRUE	miRanda	FALSE	-	FALSE	-
hsa-miR-514	MIMAT0002883	BRCA2	-0.71974	2.75604	0.00720042	-9.56105	0.0315166	TRUE	miRanda	FALSE	-	FALSE	-
hsa-miR-30e*	MIMAT0000693	BRCA2	-0.670451	2.75604	0.00720042	-6.40949	2.86e-08	TRUE	miRanda	FALSE	-	FALSE	-
hsa-miR-138	MIMAT0000430	BRCA2	-0.66143	2.75604	0.00720042	-6.09319	0.0393204	TRUE	miRanda	FALSE	-	FALSE	-
hsa-miR-532-3p	MIMAT0004780	BRCA2	-0.679335	2.75604	0.00720042	-5.3682	0.00494485	TRUE	miRanda,miRWalk,Targetscan	FALSE	-	FALSE	-
hsa-miR-192*	MIMAT0004543	BRCA2	-0.736056	2.75604	0.00720042	-2.59251	0.0496439	TRUE	miRanda,miRWalk	FALSE	-	FALSE	-
hsa-miR-200a	MIMAT0000682	BRCA2	-0.689015	2.75604	0.00720042	-46.4655	2.79e-13	FALSE	-	FALSE	-	FALSE	-
hsa-miR-194	MIMAT0000460	BRCA2	-0.798883	2.75604	0.00720042	-46.2178	9.52e-10	FALSE	-	FALSE	-	FALSE	-
hsa-miR-141	MIMAT0000432	BRCA2	-0.622262	2.75604	0.00720042	-31.9336	0.000951205	FALSE	-	FALSE	-	FALSE	-
hsa-miR-30a	MIMAT0000087	BRCA2	-0.78058	2.75604	0.00720042	-16.9463	7.4e-12	FALSE	-	FALSE	-	FALSE	-
hsa-miR-30c-2*	MIMAT0004550	BRCA2	-0.741816	2.75604	0.00720042	-7.05949	0.000128821	FALSE	-	FALSE	-	FALSE	-
hsa-miR-30c	MIMAT0000244	BRCA2	-0.740069	2.75604	0.00720042	-7.00515	8.66e-09	FALSE	-	FALSE	-	FALSE	-
hsa-miR-29c	MIMAT0000681	BRCA2	-0.640651	2.75604	0.00720042	-6.41599	7.63e-10	FALSE	-	FALSE	-	FALSE	-
hsa-miR-30b	MIMAT0000420	BRCA2	-0.573669	2.75604	0.00720042	-5.18561	2.83e-06	FALSE	-	FALSE	-	FALSE	-
hsa-miR-532-5p	MIMAT0002888	BRCA2	-0.649954	2.75604	0.00720042	-4.15879	0.000754552	FALSE	-	FALSE	-	FALSE	-
hsa-miR-30d	MIMAT0000245	BRCA2	-0.737437	2.75604	0.00720042	-4.08877	0.0040731	FALSE	-	FALSE	-	FALSE	-
hsa-miR-3174	MIMAT0015051	BRCA2	-0.538657	2.75604	0.00720042	-3.91365	0.0040731	FALSE	-	FALSE	-	FALSE	-
hsa-miR-502-3p	MIMAT0004775	BRCA2	-0.740638	2.75604	0.00720042	-3.83844	0.0195059	FALSE	-	FALSE	-	FALSE	-
hsa-miR-362-3p	MIMAT0004683	BRCA2	-0.630417	2.75604	0.00720042	-3.80364	0.00120223	FALSE	-	FALSE	-	FALSE	-
hsa-miR-362-5p	MIMAT0000705	BRCA2	-0.646434	2.75604	0.00720042	-3.72617	0.0195059	FALSE	-	FALSE	-	FALSE	-
hsa-miR-30e	MIMAT0000692	BRCA2	-0.600073	2.75604	0.00720042	-3.67906	0.000527046	FALSE	-	FALSE	-	FALSE	-
hsa-miR-3607-5p	MIMAT0017984	BRCA2	-0.510262	2.75604	0.00720042	-3.66125	0.00729408	FALSE	-	FALSE	-	FALSE	-
hsa-miR-660	MIMAT0003338	BRCA2	-0.579731	2.75604	0.00720042	-3.1577	0.00404992	FALSE	-	FALSE	-	FALSE	-
hsa-miR-200b*	MIMAT0004571	BRCA2	-0.587299	2.75604	0.00720042	-3.1324	0.0190592	FALSE	-	FALSE	-	FALSE	-
hsa-miR-650	MIMAT0003320	BRCA2	-0.559694	2.75604	0.00720042	-2.82359	0.000641415	FALSE	-	FALSE	-	FALSE	-
hsa-miR-500a*	MIMAT0002871	BRCA2	-0.703128	2.75604	0.00720042	-2.69328	0.0492036	FALSE	-	FALSE	-	FALSE	-
hsa-miR-363	MIMAT0000707	BRCA2	-0.519954	2.75604	0.00720042	-2.52828	0.0236749	FALSE	-	FALSE	-	FALSE	-
hsa-miR-29c*	MIMAT0004673	BRCA2	-0.586096	2.75604	0.00720042	-2.48117	0.0315166	FALSE	-	FALSE	-	FALSE	-
hsa-miR-455-5p	MIMAT0003150	BRCA2	-0.698351	2.75604	0.00720042	-2.36193	0.012181	FALSE	-	FALSE	-	FALSE	-
hsa-miR-665	MIMAT0004952	BRCA2	-0.63412	2.75604	0.00720042	-2.17957	0.0468347	FALSE	-	FALSE	-	FALSE	-
hsa-miR-193b	MIMAT0002819	BRCA2	-0.575187	2.75604	0.00720042	-2.11453	7.87e-05	FALSE	-	FALSE	-	FALSE	-
hsa-miR-4280	MIMAT0016911	BRCA2	-0.546624	2.75604	0.00720042	-2.08514	0.00616155	FALSE	-	FALSE	-	FALSE	-
hsa-miR-204	MIMAT0000265	BRSK1	-0.548832	2.44114	4.33e-05	-36.81	0.00154679	FALSE	-	FALSE	-	FALSE	-
hsa-miR-514	MIMAT0002883	BRSK1	-0.634682	2.44114	4.33e-05	-9.56105	0.0315166	FALSE	-	FALSE	-	FALSE	-
hsa-miR-29c	MIMAT0000681	BRSK1	-0.606658	2.44114	4.33e-05	-6.41599	7.63e-10	FALSE	-	FALSE	-	FALSE	-
hsa-miR-29b	MIMAT0000100	BRSK1	-0.680686	2.44114	4.33e-05	-6.05381	1.53e-09	FALSE	-	FALSE	-	FALSE	-
hsa-miR-4313	MIMAT0016865	BRSK1	-0.603172	2.44114	4.33e-05	-3.83928	0.0433536	FALSE	-	FALSE	-	FALSE	-
hsa-miR-184	MIMAT0000454	BRSK1	-0.511661	2.44114	4.33e-05	-3.77856	0.0471754	FALSE	-	FALSE	-	FALSE	-
hsa-miR-29a	MIMAT0000086	BRSK1	-0.654209	2.44114	4.33e-05	-3.59987	1.48e-05	FALSE	-	FALSE	-	FALSE	-
hsa-miR-650	MIMAT0003320	BRSK1	-0.639937	2.44114	4.33e-05	-2.82359	0.000641415	FALSE	-	FALSE	-	FALSE	-
hsa-miR-192*	MIMAT0004543	BRSK1	-0.612591	2.44114	4.33e-05	-2.59251	0.0496439	FALSE	-	FALSE	-	FALSE	-
hsa-miR-3619	MIMAT0017999	BRSK1	-0.595407	2.44114	4.33e-05	-2.22165	7.57e-06	FALSE	-	FALSE	-	FALSE	-
hsa-miR-22	MIMAT0000077	BRSK1	-0.535137	2.44114	4.33e-05	-2.15966	0.0040731	FALSE	-	FALSE	-	FALSE	-
hsa-miR-149	MIMAT0000450	BSND	-0.503256	-7.4379	1.21e-14	2.291	0.0120225	FALSE	-	FALSE	-	FALSE	-
hsa-miR-342-3p	MIMAT0000753	BSND	-0.626084	-7.4379	1.21e-14	2.3406	0.0190592	FALSE	-	FALSE	-	FALSE	-
hsa-miR-130b	MIMAT0000691	BSND	-0.529169	-7.4379	1.21e-14	3.80083	0.00520967	FALSE	-	FALSE	-	FALSE	-
hsa-miR-149	MIMAT0000450	BSPRY	-0.579037	-4.8163	1.88e-09	2.291	0.0120225	TRUE	miRanda,miRWalk,Targetscan	FALSE	-	FALSE	-
hsa-miR-320d	MIMAT0006764	BSPRY	-0.530845	-4.8163	1.88e-09	3.33924	0.000298489	TRUE	miRanda,miRWalk,Targetscan	FALSE	-	FALSE	-
hsa-miR-320e	MIMAT0015072	BSPRY	-0.554799	-4.8163	1.88e-09	2.96208	0.000298489	FALSE	-	FALSE	-	FALSE	-
hsa-miR-204	MIMAT0000265	BTBD17	-0.529857	3.33661	4.17e-05	-36.81	0.00154679	FALSE	-	FALSE	-	FALSE	-
hsa-miR-29c	MIMAT0000681	BTBD17	-0.502516	3.33661	4.17e-05	-6.41599	7.63e-10	FALSE	-	FALSE	-	FALSE	-
hsa-miR-29a	MIMAT0000086	BTBD17	-0.509225	3.33661	4.17e-05	-3.59987	1.48e-05	FALSE	-	FALSE	-	FALSE	-
hsa-miR-193b	MIMAT0002819	BTBD17	-0.670607	3.33661	4.17e-05	-2.11453	7.87e-05	FALSE	-	FALSE	-	FALSE	-
hsa-miR-320c	MIMAT0005793	BTC	-0.508963	-2.67896	8.13e-07	3.59274	3.56e-09	TRUE	miRanda	FALSE	-	FALSE	-
hsa-miR-130b	MIMAT0000691	BTC	-0.510718	-2.67896	8.13e-07	3.80083	0.00520967	TRUE	miRanda	FALSE	-	FALSE	-
hsa-miR-149	MIMAT0000450	BTC	-0.54311	-2.67896	8.13e-07	2.291	0.0120225	FALSE	-	FALSE	-	FALSE	-
hsa-miR-483-3p	MIMAT0002173	BTC	-0.570467	-2.67896	8.13e-07	8.10918	0.0126338	FALSE	-	FALSE	-	FALSE	-
hsa-miR-4327	MIMAT0016889	C10orf115	-0.513564	-2.08341	0.00938865	2.04839	0.0486507	FALSE	-	FALSE	-	FALSE	-
hsa-miR-320c	MIMAT0005793	C10orf115	-0.641636	-2.08341	0.00938865	3.59274	3.56e-09	FALSE	-	FALSE	-	FALSE	-
hsa-miR-342-3p	MIMAT0000753	C10orf126	-0.717749	-4.79546	2.92e-08	2.3406	0.0190592	FALSE	-	FALSE	-	FALSE	-
hsa-miR-130b	MIMAT0000691	C10orf126	-0.59516	-4.79546	2.92e-08	3.80083	0.00520967	FALSE	-	FALSE	-	FALSE	-
hsa-miR-320c	MIMAT0005793	C10orf67	-0.545161	-2.11737	0.000449535	3.59274	3.56e-09	FALSE	-	FALSE	-	FALSE	-
hsa-miR-483-3p	MIMAT0002173	C11orf35	-0.577161	-2.26971	2.03e-10	8.10918	0.0126338	TRUE	miRanda,miRWalk,Targetscan	FALSE	-	FALSE	-
hsa-miR-342-3p	MIMAT0000753	C11orf35	-0.521781	-2.26971	2.03e-10	2.3406	0.0190592	FALSE	-	FALSE	-	FALSE	-
hsa-miR-130b	MIMAT0000691	C11orf35	-0.547089	-2.26971	2.03e-10	3.80083	0.00520967	FALSE	-	FALSE	-	FALSE	-
hsa-miR-199b-5p	MIMAT0000263	C11orf35	-0.572306	-2.26971	2.03e-10	4.57993	0.00988295	FALSE	-	FALSE	-	FALSE	-
hsa-miR-320c	MIMAT0005793	C11orf52	-0.581255	-3.71089	7.07e-06	3.59274	3.56e-09	TRUE	miRanda,miRWalk	FALSE	-	FALSE	-
hsa-miR-483-3p	MIMAT0002173	C11orf52	-0.545388	-3.71089	7.07e-06	8.10918	0.0126338	TRUE	miRanda	FALSE	-	FALSE	-
hsa-miR-3148	MIMAT0015021	C11orf52	-0.512855	-3.71089	7.07e-06	2.16406	8.93e-05	FALSE	-	FALSE	-	FALSE	-
hsa-miR-595	MIMAT0003263	C11orf52	-0.571336	-3.71089	7.07e-06	2.56618	0.000369323	FALSE	-	FALSE	-	FALSE	-
hsa-miR-342-3p	MIMAT0000753	C11orf54	-0.540426	-3.08727	6.62e-13	2.3406	0.0190592	TRUE	miRanda	FALSE	-	FALSE	-
hsa-miR-320d	MIMAT0006764	C11orf54	-0.625092	-3.08727	6.62e-13	3.33924	0.000298489	TRUE	miRanda,miRDB,miRWalk,Targetscan	FALSE	-	FALSE	-
hsa-miR-320c	MIMAT0005793	C11orf54	-0.56794	-3.08727	6.62e-13	3.59274	3.56e-09	TRUE	miRanda,miRDB,miRWalk,Targetscan	FALSE	-	FALSE	-
hsa-miR-199b-5p	MIMAT0000263	C11orf54	-0.533733	-3.08727	6.62e-13	4.57993	0.00988295	TRUE	miRanda,miRWalk,Targetscan	FALSE	-	FALSE	-
hsa-miR-320e	MIMAT0015072	C11orf54	-0.584393	-3.08727	6.62e-13	2.96208	0.000298489	FALSE	-	FALSE	-	FALSE	-
hsa-miR-130b	MIMAT0000691	C11orf54	-0.579961	-3.08727	6.62e-13	3.80083	0.00520967	FALSE	-	FALSE	-	FALSE	-
hsa-miR-483-3p	MIMAT0002173	C11orf54	-0.614387	-3.08727	6.62e-13	8.10918	0.0126338	FALSE	-	FALSE	-	FALSE	-
hsa-miR-200b	MIMAT0000318	C11orf82	-0.544323	3.53659	0.0288015	-35.3775	3.1e-06	TRUE	miRanda,miRWalk,Targetscan	FALSE	-	FALSE	-
hsa-miR-532-3p	MIMAT0004780	C11orf82	-0.548611	3.53659	0.0288015	-5.3682	0.00494485	TRUE	miRanda	FALSE	-	FALSE	-
hsa-miR-200b*	MIMAT0004571	C11orf82	-0.563102	3.53659	0.0288015	-3.1324	0.0190592	TRUE	miRanda	FALSE	-	FALSE	-
hsa-miR-200a	MIMAT0000682	C11orf82	-0.5503	3.53659	0.0288015	-46.4655	2.79e-13	FALSE	-	FALSE	-	FALSE	-
hsa-miR-194	MIMAT0000460	C11orf82	-0.589705	3.53659	0.0288015	-46.2178	9.52e-10	FALSE	-	FALSE	-	FALSE	-
hsa-miR-204	MIMAT0000265	C11orf82	-0.713342	3.53659	0.0288015	-36.81	0.00154679	FALSE	-	FALSE	-	FALSE	-
hsa-miR-192	MIMAT0000222	C11orf82	-0.641941	3.53659	0.0288015	-28.5527	0.00455468	FALSE	-	FALSE	-	FALSE	-
hsa-miR-30a*	MIMAT0000088	C11orf82	-0.696867	3.53659	0.0288015	-18.8146	0.00022834	FALSE	-	FALSE	-	FALSE	-
hsa-miR-30a	MIMAT0000087	C11orf82	-0.585127	3.53659	0.0288015	-16.9463	7.4e-12	FALSE	-	FALSE	-	FALSE	-
hsa-miR-514	MIMAT0002883	C11orf82	-0.607381	3.53659	0.0288015	-9.56105	0.0315166	FALSE	-	FALSE	-	FALSE	-
hsa-miR-30c-2*	MIMAT0004550	C11orf82	-0.645951	3.53659	0.0288015	-7.05949	0.000128821	FALSE	-	FALSE	-	FALSE	-
hsa-miR-30c	MIMAT0000244	C11orf82	-0.53491	3.53659	0.0288015	-7.00515	8.66e-09	FALSE	-	FALSE	-	FALSE	-
hsa-miR-29c	MIMAT0000681	C11orf82	-0.70635	3.53659	0.0288015	-6.41599	7.63e-10	FALSE	-	FALSE	-	FALSE	-
hsa-miR-30e*	MIMAT0000693	C11orf82	-0.53317	3.53659	0.0288015	-6.40949	2.86e-08	FALSE	-	FALSE	-	FALSE	-
hsa-miR-29b	MIMAT0000100	C11orf82	-0.635671	3.53659	0.0288015	-6.05381	1.53e-09	FALSE	-	FALSE	-	FALSE	-
hsa-miR-532-5p	MIMAT0002888	C11orf82	-0.529017	3.53659	0.0288015	-4.15879	0.000754552	FALSE	-	FALSE	-	FALSE	-
hsa-miR-30d	MIMAT0000245	C11orf82	-0.539825	3.53659	0.0288015	-4.08877	0.0040731	FALSE	-	FALSE	-	FALSE	-
hsa-miR-502-3p	MIMAT0004775	C11orf82	-0.688426	3.53659	0.0288015	-3.83844	0.0195059	FALSE	-	FALSE	-	FALSE	-
hsa-miR-362-3p	MIMAT0004683	C11orf82	-0.572412	3.53659	0.0288015	-3.80364	0.00120223	FALSE	-	FALSE	-	FALSE	-
hsa-miR-184	MIMAT0000454	C11orf82	-0.573709	3.53659	0.0288015	-3.77856	0.0471754	FALSE	-	FALSE	-	FALSE	-
hsa-miR-362-5p	MIMAT0000705	C11orf82	-0.557662	3.53659	0.0288015	-3.72617	0.0195059	FALSE	-	FALSE	-	FALSE	-
hsa-miR-30e	MIMAT0000692	C11orf82	-0.524387	3.53659	0.0288015	-3.67906	0.000527046	FALSE	-	FALSE	-	FALSE	-
hsa-miR-29a	MIMAT0000086	C11orf82	-0.672315	3.53659	0.0288015	-3.59987	1.48e-05	FALSE	-	FALSE	-	FALSE	-
hsa-miR-650	MIMAT0003320	C11orf82	-0.541576	3.53659	0.0288015	-2.82359	0.000641415	FALSE	-	FALSE	-	FALSE	-
hsa-miR-500a*	MIMAT0002871	C11orf82	-0.591244	3.53659	0.0288015	-2.69328	0.0492036	FALSE	-	FALSE	-	FALSE	-
hsa-miR-192*	MIMAT0004543	C11orf82	-0.692262	3.53659	0.0288015	-2.59251	0.0496439	FALSE	-	FALSE	-	FALSE	-
hsa-miR-29c*	MIMAT0004673	C11orf82	-0.654329	3.53659	0.0288015	-2.48117	0.0315166	FALSE	-	FALSE	-	FALSE	-
hsa-miR-455-5p	MIMAT0003150	C11orf82	-0.623757	3.53659	0.0288015	-2.36193	0.012181	FALSE	-	FALSE	-	FALSE	-
hsa-miR-22*	MIMAT0004495	C11orf82	-0.534565	3.53659	0.0288015	-2.18871	3.33e-06	FALSE	-	FALSE	-	FALSE	-
hsa-miR-22	MIMAT0000077	C11orf82	-0.553324	3.53659	0.0288015	-2.15966	0.0040731	FALSE	-	FALSE	-	FALSE	-
hsa-miR-193b	MIMAT0002819	C11orf82	-0.541551	3.53659	0.0288015	-2.11453	7.87e-05	FALSE	-	FALSE	-	FALSE	-
hsa-miR-4327	MIMAT0016889	C11orf86	-0.536448	-2.88744	0.0493819	2.04839	0.0486507	FALSE	-	FALSE	-	FALSE	-
hsa-miR-342-3p	MIMAT0000753	C11orf86	-0.549286	-2.88744	0.0493819	2.3406	0.0190592	FALSE	-	FALSE	-	FALSE	-
hsa-miR-130b	MIMAT0000691	C11orf86	-0.570372	-2.88744	0.0493819	3.80083	0.00520967	FALSE	-	FALSE	-	FALSE	-
hsa-miR-1973	MIMAT0009448	C11orf87	-0.571407	2.70477	1.49e-06	-22.3522	0.00154679	FALSE	-	FALSE	-	FALSE	-
hsa-miR-4313	MIMAT0016865	C11orf87	-0.534221	2.70477	1.49e-06	-3.83928	0.0433536	FALSE	-	FALSE	-	FALSE	-
hsa-miR-149	MIMAT0000450	C12orf39	-0.518732	-2.57954	8.85e-08	2.291	0.0120225	FALSE	-	FALSE	-	FALSE	-
hsa-miR-342-3p	MIMAT0000753	C12orf39	-0.593753	-2.57954	8.85e-08	2.3406	0.0190592	FALSE	-	FALSE	-	FALSE	-
hsa-miR-320c	MIMAT0005793	C12orf39	-0.540088	-2.57954	8.85e-08	3.59274	3.56e-09	FALSE	-	FALSE	-	FALSE	-
hsa-miR-130b	MIMAT0000691	C12orf39	-0.583344	-2.57954	8.85e-08	3.80083	0.00520967	FALSE	-	FALSE	-	FALSE	-
hsa-miR-483-3p	MIMAT0002173	C12orf39	-0.549498	-2.57954	8.85e-08	8.10918	0.0126338	FALSE	-	FALSE	-	FALSE	-
hsa-miR-149	MIMAT0000450	C14orf105	-0.507454	-5.39835	3.06e-10	2.291	0.0120225	TRUE	miRanda,miRWalk,Targetscan	FALSE	-	FALSE	-
hsa-miR-320d	MIMAT0006764	C14orf105	-0.513748	-5.39835	3.06e-10	3.33924	0.000298489	TRUE	miRanda,miRWalk,Targetscan	FALSE	-	FALSE	-
hsa-miR-320c	MIMAT0005793	C14orf105	-0.549333	-5.39835	3.06e-10	3.59274	3.56e-09	TRUE	miRanda,miRWalk,Targetscan	FALSE	-	FALSE	-
hsa-miR-342-3p	MIMAT0000753	C14orf105	-0.551329	-5.39835	3.06e-10	2.3406	0.0190592	FALSE	-	FALSE	-	FALSE	-
hsa-miR-320e	MIMAT0015072	C14orf105	-0.504604	-5.39835	3.06e-10	2.96208	0.000298489	FALSE	-	FALSE	-	FALSE	-
hsa-miR-483-3p	MIMAT0002173	C14orf105	-0.555889	-5.39835	3.06e-10	8.10918	0.0126338	FALSE	-	FALSE	-	FALSE	-
hsa-miR-342-3p	MIMAT0000753	C14orf164	-0.556439	-2.08822	0.0120429	2.3406	0.0190592	FALSE	-	FALSE	-	FALSE	-
hsa-miR-342-3p	MIMAT0000753	C16orf11	-0.620693	-7.03507	1.62e-05	2.3406	0.0190592	FALSE	-	FALSE	-	FALSE	-
hsa-miR-320c	MIMAT0005793	C16orf11	-0.506503	-7.03507	1.62e-05	3.59274	3.56e-09	FALSE	-	FALSE	-	FALSE	-
hsa-miR-130b	MIMAT0000691	C16orf11	-0.507272	-7.03507	1.62e-05	3.80083	0.00520967	FALSE	-	FALSE	-	FALSE	-
hsa-miR-145	MIMAT0000437	C16orf59	-0.536886	2.65735	0.0134798	-2.30911	0.000190459	TRUE	miRanda,miRWalk,Targetscan	FALSE	-	FALSE	-
hsa-miR-204	MIMAT0000265	C16orf59	-0.506392	2.65735	0.0134798	-36.81	0.00154679	FALSE	-	FALSE	-	FALSE	-
hsa-miR-29c	MIMAT0000681	C16orf59	-0.684144	2.65735	0.0134798	-6.41599	7.63e-10	FALSE	-	FALSE	-	FALSE	-
hsa-miR-29b	MIMAT0000100	C16orf59	-0.691347	2.65735	0.0134798	-6.05381	1.53e-09	FALSE	-	FALSE	-	FALSE	-
hsa-miR-502-3p	MIMAT0004775	C16orf59	-0.527658	2.65735	0.0134798	-3.83844	0.0195059	FALSE	-	FALSE	-	FALSE	-
hsa-miR-29a	MIMAT0000086	C16orf59	-0.77094	2.65735	0.0134798	-3.59987	1.48e-05	FALSE	-	FALSE	-	FALSE	-
hsa-miR-192*	MIMAT0004543	C16orf59	-0.532336	2.65735	0.0134798	-2.59251	0.0496439	FALSE	-	FALSE	-	FALSE	-
hsa-miR-29c*	MIMAT0004673	C16orf59	-0.547715	2.65735	0.0134798	-2.48117	0.0315166	FALSE	-	FALSE	-	FALSE	-
hsa-miR-22*	MIMAT0004495	C16orf59	-0.506222	2.65735	0.0134798	-2.18871	3.33e-06	FALSE	-	FALSE	-	FALSE	-
hsa-miR-22	MIMAT0000077	C16orf59	-0.736224	2.65735	0.0134798	-2.15966	0.0040731	FALSE	-	FALSE	-	FALSE	-
hsa-miR-149	MIMAT0000450	C16orf89	-0.525329	-3.67681	0.000109835	2.291	0.0120225	FALSE	-	FALSE	-	FALSE	-
hsa-miR-483-3p	MIMAT0002173	C16orf89	-0.632373	-3.67681	0.000109835	8.10918	0.0126338	FALSE	-	FALSE	-	FALSE	-
hsa-miR-149	MIMAT0000450	C19orf33	-0.518413	-2.31272	0.022752	2.291	0.0120225	FALSE	-	FALSE	-	FALSE	-
hsa-miR-483-3p	MIMAT0002173	C19orf33	-0.603984	-2.31272	0.022752	8.10918	0.0126338	FALSE	-	FALSE	-	FALSE	-
hsa-miR-342-3p	MIMAT0000753	C19orf69	-0.704895	-3.25392	4.96e-06	2.3406	0.0190592	FALSE	-	FALSE	-	FALSE	-
hsa-miR-130b	MIMAT0000691	C19orf69	-0.618912	-3.25392	4.96e-06	3.80083	0.00520967	FALSE	-	FALSE	-	FALSE	-
hsa-miR-199b-5p	MIMAT0000263	C19orf69	-0.608059	-3.25392	4.96e-06	4.57993	0.00988295	FALSE	-	FALSE	-	FALSE	-
hsa-miR-483-3p	MIMAT0002173	C19orf69	-0.534119	-3.25392	4.96e-06	8.10918	0.0126338	FALSE	-	FALSE	-	FALSE	-
hsa-miR-149	MIMAT0000450	C19orf77	-0.523431	-6.34866	8.05e-11	2.291	0.0120225	FALSE	-	FALSE	-	FALSE	-
hsa-miR-342-3p	MIMAT0000753	C19orf77	-0.501204	-6.34866	8.05e-11	2.3406	0.0190592	FALSE	-	FALSE	-	FALSE	-
hsa-miR-320e	MIMAT0015072	C19orf77	-0.502307	-6.34866	8.05e-11	2.96208	0.000298489	FALSE	-	FALSE	-	FALSE	-
hsa-miR-320c	MIMAT0005793	C19orf77	-0.553308	-6.34866	8.05e-11	3.59274	3.56e-09	FALSE	-	FALSE	-	FALSE	-
hsa-miR-483-3p	MIMAT0002173	C19orf77	-0.542301	-6.34866	8.05e-11	8.10918	0.0126338	FALSE	-	FALSE	-	FALSE	-
hsa-miR-3148	MIMAT0015021	C1orf106	-0.623693	-2.1879	0.0001364	2.16406	8.93e-05	FALSE	-	FALSE	-	FALSE	-
hsa-miR-1281	MIMAT0005939	C1orf106	-0.545239	-2.1879	0.0001364	2.16453	0.00789577	FALSE	-	FALSE	-	FALSE	-
hsa-miR-3149	MIMAT0015022	C1orf106	-0.589464	-2.1879	0.0001364	2.31002	0.00144797	FALSE	-	FALSE	-	FALSE	-
hsa-miR-595	MIMAT0003263	C1orf106	-0.558021	-2.1879	0.0001364	2.56618	0.000369323	FALSE	-	FALSE	-	FALSE	-
hsa-miR-320c	MIMAT0005793	C1orf106	-0.511339	-2.1879	0.0001364	3.59274	3.56e-09	FALSE	-	FALSE	-	FALSE	-
hsa-miR-320d	MIMAT0006764	C1orf115	-0.543241	-3.10969	3.79e-11	3.33924	0.000298489	TRUE	miRanda,Targetscan	FALSE	-	FALSE	-
hsa-miR-320c	MIMAT0005793	C1orf115	-0.670718	-3.10969	3.79e-11	3.59274	3.56e-09	TRUE	miRanda,Targetscan	FALSE	-	FALSE	-
hsa-miR-320e	MIMAT0015072	C1orf115	-0.560389	-3.10969	3.79e-11	2.96208	0.000298489	FALSE	-	FALSE	-	FALSE	-
hsa-miR-130b	MIMAT0000691	C1orf115	-0.503146	-3.10969	3.79e-11	3.80083	0.00520967	FALSE	-	FALSE	-	FALSE	-
hsa-miR-342-3p	MIMAT0000753	C1orf116	-0.534925	-4.80167	0.000246446	2.3406	0.0190592	TRUE	miRanda,miRWalk,Targetscan	FALSE	-	FALSE	-
hsa-miR-320c	MIMAT0005793	C1orf116	-0.511921	-4.80167	0.000246446	3.59274	3.56e-09	TRUE	Targetscan	FALSE	-	FALSE	-
hsa-miR-483-3p	MIMAT0002173	C1orf116	-0.56517	-4.80167	0.000246446	8.10918	0.0126338	TRUE	miRanda,miRWalk,Targetscan	FALSE	-	FALSE	-
hsa-miR-320e	MIMAT0015072	C1orf116	-0.509862	-4.80167	0.000246446	2.96208	0.000298489	FALSE	-	FALSE	-	FALSE	-
hsa-miR-149	MIMAT0000450	C1orf168	-0.595948	-5.02303	1.44e-09	2.291	0.0120225	TRUE	miRanda	FALSE	-	FALSE	-
hsa-miR-130b	MIMAT0000691	C1orf168	-0.592471	-5.02303	1.44e-09	3.80083	0.00520967	TRUE	miRanda,miRWalk,RNA22	FALSE	-	FALSE	-
hsa-miR-342-3p	MIMAT0000753	C1orf168	-0.563603	-5.02303	1.44e-09	2.3406	0.0190592	FALSE	-	FALSE	-	FALSE	-
hsa-miR-483-3p	MIMAT0002173	C1orf168	-0.663208	-5.02303	1.44e-09	8.10918	0.0126338	FALSE	-	FALSE	-	FALSE	-
hsa-miR-3148	MIMAT0015021	C1orf172	-0.587458	-2.44058	0.000106597	2.16406	8.93e-05	FALSE	-	FALSE	-	FALSE	-
hsa-miR-1281	MIMAT0005939	C1orf172	-0.527374	-2.44058	0.000106597	2.16453	0.00789577	FALSE	-	FALSE	-	FALSE	-
hsa-miR-4290	MIMAT0016921	C1orf172	-0.527077	-2.44058	0.000106597	2.16527	0.00455468	FALSE	-	FALSE	-	FALSE	-
hsa-miR-3149	MIMAT0015022	C1orf172	-0.568261	-2.44058	0.000106597	2.31002	0.00144797	FALSE	-	FALSE	-	FALSE	-
hsa-miR-382	MIMAT0000737	C1orf172	-0.601607	-2.44058	0.000106597	2.51265	0.000951205	FALSE	-	FALSE	-	FALSE	-
hsa-miR-595	MIMAT0003263	C1orf172	-0.583764	-2.44058	0.000106597	2.56618	0.000369323	FALSE	-	FALSE	-	FALSE	-
hsa-miR-4270	MIMAT0016900	C1orf172	-0.551932	-2.44058	0.000106597	3.25387	7.35e-05	FALSE	-	FALSE	-	FALSE	-
hsa-miR-1225-5p	MIMAT0005572	C1orf172	-0.507108	-2.44058	0.000106597	3.50426	9.16e-06	FALSE	-	FALSE	-	FALSE	-
hsa-miR-320c	MIMAT0005793	C1orf172	-0.508357	-2.44058	0.000106597	3.59274	3.56e-09	FALSE	-	FALSE	-	FALSE	-
hsa-miR-34a	MIMAT0000255	C1orf172	-0.63628	-2.44058	0.000106597	5.47031	0.0483291	FALSE	-	FALSE	-	FALSE	-
hsa-miR-130b	MIMAT0000691	C1orf204	-0.514141	-2.2129	2.25e-06	3.80083	0.00520967	FALSE	-	FALSE	-	FALSE	-
hsa-miR-483-3p	MIMAT0002173	C1orf204	-0.631917	-2.2129	2.25e-06	8.10918	0.0126338	FALSE	-	FALSE	-	FALSE	-
hsa-miR-149	MIMAT0000450	C1orf210	-0.557404	-3.13037	5.53e-06	2.291	0.0120225	TRUE	miRanda	FALSE	-	FALSE	-
hsa-miR-320e	MIMAT0015072	C1orf210	-0.580749	-3.13037	5.53e-06	2.96208	0.000298489	FALSE	-	FALSE	-	FALSE	-
hsa-miR-320d	MIMAT0006764	C1orf210	-0.557744	-3.13037	5.53e-06	3.33924	0.000298489	FALSE	-	FALSE	-	FALSE	-
hsa-miR-320c	MIMAT0005793	C1orf210	-0.578898	-3.13037	5.53e-06	3.59274	3.56e-09	FALSE	-	FALSE	-	FALSE	-
hsa-miR-149	MIMAT0000450	C1orf64	-0.545144	-2.96277	0.002827	2.291	0.0120225	FALSE	-	FALSE	-	FALSE	-
hsa-miR-342-3p	MIMAT0000753	C1orf64	-0.680393	-2.96277	0.002827	2.3406	0.0190592	FALSE	-	FALSE	-	FALSE	-
hsa-miR-320d	MIMAT0006764	C1orf64	-0.53435	-2.96277	0.002827	3.33924	0.000298489	FALSE	-	FALSE	-	FALSE	-
hsa-miR-130b	MIMAT0000691	C1orf64	-0.561054	-2.96277	0.002827	3.80083	0.00520967	FALSE	-	FALSE	-	FALSE	-
hsa-miR-204	MIMAT0000265	C1QA	-0.543347	3.10776	0.0152804	-36.81	0.00154679	TRUE	miRanda	FALSE	-	FALSE	-
hsa-miR-194	MIMAT0000460	C1QA	-0.660658	3.10776	0.0152804	-46.2178	9.52e-10	FALSE	-	FALSE	-	FALSE	-
hsa-miR-192	MIMAT0000222	C1QA	-0.638017	3.10776	0.0152804	-28.5527	0.00455468	FALSE	-	FALSE	-	FALSE	-
hsa-miR-30c	MIMAT0000244	C1QA	-0.639735	3.10776	0.0152804	-7.00515	8.66e-09	FALSE	-	FALSE	-	FALSE	-
hsa-miR-30e*	MIMAT0000693	C1QA	-0.6406	3.10776	0.0152804	-6.40949	2.86e-08	FALSE	-	FALSE	-	FALSE	-
hsa-miR-4284	MIMAT0016915	C1QA	-0.600751	3.10776	0.0152804	-5.84348	0.00234241	FALSE	-	FALSE	-	FALSE	-
hsa-miR-532-3p	MIMAT0004780	C1QA	-0.517512	3.10776	0.0152804	-5.3682	0.00494485	FALSE	-	FALSE	-	FALSE	-
hsa-miR-30b	MIMAT0000420	C1QA	-0.620584	3.10776	0.0152804	-5.18561	2.83e-06	FALSE	-	FALSE	-	FALSE	-
hsa-miR-532-5p	MIMAT0002888	C1QA	-0.50279	3.10776	0.0152804	-4.15879	0.000754552	FALSE	-	FALSE	-	FALSE	-
hsa-miR-30e	MIMAT0000692	C1QA	-0.509822	3.10776	0.0152804	-3.67906	0.000527046	FALSE	-	FALSE	-	FALSE	-
hsa-miR-192*	MIMAT0004543	C1QA	-0.520563	3.10776	0.0152804	-2.59251	0.0496439	FALSE	-	FALSE	-	FALSE	-
hsa-miR-4254	MIMAT0016884	C1QA	-0.523852	3.10776	0.0152804	-2.23216	0.044083	FALSE	-	FALSE	-	FALSE	-
hsa-miR-23b	MIMAT0000418	C1QA	-0.528848	3.10776	0.0152804	-2.22707	0.000137514	FALSE	-	FALSE	-	FALSE	-
hsa-miR-194	MIMAT0000460	C1QB	-0.707808	3.84906	0.0166177	-46.2178	9.52e-10	FALSE	-	FALSE	-	FALSE	-
hsa-miR-204	MIMAT0000265	C1QB	-0.628433	3.84906	0.0166177	-36.81	0.00154679	FALSE	-	FALSE	-	FALSE	-
hsa-miR-192	MIMAT0000222	C1QB	-0.713123	3.84906	0.0166177	-28.5527	0.00455468	FALSE	-	FALSE	-	FALSE	-
hsa-miR-429	MIMAT0001536	C1QB	-0.502687	3.84906	0.0166177	-28.4646	9.52e-10	FALSE	-	FALSE	-	FALSE	-
hsa-miR-30a*	MIMAT0000088	C1QB	-0.574892	3.84906	0.0166177	-18.8146	0.00022834	FALSE	-	FALSE	-	FALSE	-
hsa-miR-514	MIMAT0002883	C1QB	-0.543753	3.84906	0.0166177	-9.56105	0.0315166	FALSE	-	FALSE	-	FALSE	-
hsa-miR-30c-2*	MIMAT0004550	C1QB	-0.565013	3.84906	0.0166177	-7.05949	0.000128821	FALSE	-	FALSE	-	FALSE	-
hsa-miR-30c	MIMAT0000244	C1QB	-0.691326	3.84906	0.0166177	-7.00515	8.66e-09	FALSE	-	FALSE	-	FALSE	-
hsa-miR-30e*	MIMAT0000693	C1QB	-0.682831	3.84906	0.0166177	-6.40949	2.86e-08	FALSE	-	FALSE	-	FALSE	-
hsa-miR-4284	MIMAT0016915	C1QB	-0.565453	3.84906	0.0166177	-5.84348	0.00234241	FALSE	-	FALSE	-	FALSE	-
hsa-miR-532-3p	MIMAT0004780	C1QB	-0.550226	3.84906	0.0166177	-5.3682	0.00494485	FALSE	-	FALSE	-	FALSE	-
hsa-miR-30b	MIMAT0000420	C1QB	-0.634614	3.84906	0.0166177	-5.18561	2.83e-06	FALSE	-	FALSE	-	FALSE	-
hsa-miR-532-5p	MIMAT0002888	C1QB	-0.549298	3.84906	0.0166177	-4.15879	0.000754552	FALSE	-	FALSE	-	FALSE	-
hsa-miR-30e	MIMAT0000692	C1QB	-0.530158	3.84906	0.0166177	-3.67906	0.000527046	FALSE	-	FALSE	-	FALSE	-
hsa-miR-660	MIMAT0003338	C1QB	-0.520018	3.84906	0.0166177	-3.1577	0.00404992	FALSE	-	FALSE	-	FALSE	-
hsa-miR-192*	MIMAT0004543	C1QB	-0.62124	3.84906	0.0166177	-2.59251	0.0496439	FALSE	-	FALSE	-	FALSE	-
hsa-miR-363	MIMAT0000707	C1QB	-0.532245	3.84906	0.0166177	-2.52828	0.0236749	FALSE	-	FALSE	-	FALSE	-
hsa-miR-4254	MIMAT0016884	C1QB	-0.522444	3.84906	0.0166177	-2.23216	0.044083	FALSE	-	FALSE	-	FALSE	-
hsa-miR-23b	MIMAT0000418	C1QB	-0.550583	3.84906	0.0166177	-2.22707	0.000137514	FALSE	-	FALSE	-	FALSE	-
hsa-miR-194	MIMAT0000460	C1QC	-0.669113	2.97514	0.0404043	-46.2178	9.52e-10	FALSE	-	FALSE	-	FALSE	-
hsa-miR-192	MIMAT0000222	C1QC	-0.605447	2.97514	0.0404043	-28.5527	0.00455468	FALSE	-	FALSE	-	FALSE	-
hsa-miR-30c	MIMAT0000244	C1QC	-0.669163	2.97514	0.0404043	-7.00515	8.66e-09	FALSE	-	FALSE	-	FALSE	-
hsa-miR-30e*	MIMAT0000693	C1QC	-0.650501	2.97514	0.0404043	-6.40949	2.86e-08	FALSE	-	FALSE	-	FALSE	-
hsa-miR-4284	MIMAT0016915	C1QC	-0.611822	2.97514	0.0404043	-5.84348	0.00234241	FALSE	-	FALSE	-	FALSE	-
hsa-miR-532-3p	MIMAT0004780	C1QC	-0.517412	2.97514	0.0404043	-5.3682	0.00494485	FALSE	-	FALSE	-	FALSE	-
hsa-miR-30b	MIMAT0000420	C1QC	-0.679822	2.97514	0.0404043	-5.18561	2.83e-06	FALSE	-	FALSE	-	FALSE	-
hsa-miR-30e	MIMAT0000692	C1QC	-0.520996	2.97514	0.0404043	-3.67906	0.000527046	FALSE	-	FALSE	-	FALSE	-
hsa-miR-363	MIMAT0000707	C1QC	-0.538666	2.97514	0.0404043	-2.52828	0.0236749	FALSE	-	FALSE	-	FALSE	-
hsa-miR-23b	MIMAT0000418	C1QC	-0.502363	2.97514	0.0404043	-2.22707	0.000137514	FALSE	-	FALSE	-	FALSE	-
hsa-miR-483-3p	MIMAT0002173	C21orf62	-0.625527	-3.57115	0.0305204	8.10918	0.0126338	TRUE	Targetscan	FALSE	-	FALSE	-
hsa-miR-149	MIMAT0000450	C2CD4D	-0.518668	-2.16246	0.00607039	2.291	0.0120225	FALSE	-	FALSE	-	FALSE	-
hsa-miR-342-3p	MIMAT0000753	C2CD4D	-0.540103	-2.16246	0.00607039	2.3406	0.0190592	FALSE	-	FALSE	-	FALSE	-
hsa-miR-3148	MIMAT0015021	C2orf40	-0.529797	-3.29386	8.03e-05	2.16406	8.93e-05	FALSE	-	FALSE	-	FALSE	-
hsa-miR-3149	MIMAT0015022	C2orf40	-0.518148	-3.29386	8.03e-05	2.31002	0.00144797	FALSE	-	FALSE	-	FALSE	-
hsa-miR-382	MIMAT0000737	C2orf40	-0.527238	-3.29386	8.03e-05	2.51265	0.000951205	FALSE	-	FALSE	-	FALSE	-
hsa-miR-595	MIMAT0003263	C2orf40	-0.54327	-3.29386	8.03e-05	2.56618	0.000369323	FALSE	-	FALSE	-	FALSE	-
hsa-miR-4281	MIMAT0016907	C2orf40	-0.504407	-3.29386	8.03e-05	3.00879	0.00234241	FALSE	-	FALSE	-	FALSE	-
hsa-miR-4270	MIMAT0016900	C2orf40	-0.516498	-3.29386	8.03e-05	3.25387	7.35e-05	FALSE	-	FALSE	-	FALSE	-
hsa-miR-34a	MIMAT0000255	C2orf40	-0.591199	-3.29386	8.03e-05	5.47031	0.0483291	FALSE	-	FALSE	-	FALSE	-
hsa-miR-342-3p	MIMAT0000753	C2orf54	-0.582737	-5.63932	2.24e-06	2.3406	0.0190592	TRUE	miRanda,Targetscan	FALSE	-	FALSE	-
hsa-miR-130b	MIMAT0000691	C2orf54	-0.576905	-5.63932	2.24e-06	3.80083	0.00520967	TRUE	miRanda,miRWalk	FALSE	-	FALSE	-
hsa-miR-149	MIMAT0000450	C2orf54	-0.505744	-5.63932	2.24e-06	2.291	0.0120225	FALSE	-	FALSE	-	FALSE	-
hsa-miR-483-3p	MIMAT0002173	C2orf54	-0.589452	-5.63932	2.24e-06	8.10918	0.0126338	FALSE	-	FALSE	-	FALSE	-
hsa-miR-342-3p	MIMAT0000753	C2orf62	-0.5333	-2.07537	0.00531778	2.3406	0.0190592	FALSE	-	FALSE	-	FALSE	-
hsa-miR-130b	MIMAT0000691	C2orf62	-0.505081	-2.07537	0.00531778	3.80083	0.00520967	FALSE	-	FALSE	-	FALSE	-
hsa-miR-149	MIMAT0000450	C2orf71	-0.597056	-2.87648	0.0248006	2.291	0.0120225	FALSE	-	FALSE	-	FALSE	-
hsa-miR-342-3p	MIMAT0000753	C2orf71	-0.652447	-2.87648	0.0248006	2.3406	0.0190592	FALSE	-	FALSE	-	FALSE	-
hsa-miR-130b	MIMAT0000691	C2orf71	-0.575385	-2.87648	0.0248006	3.80083	0.00520967	FALSE	-	FALSE	-	FALSE	-
hsa-miR-29c	MIMAT0000681	C3orf70	-0.599678	2.11915	0.0117487	-6.41599	7.63e-10	FALSE	-	FALSE	-	FALSE	-
hsa-miR-29b	MIMAT0000100	C3orf70	-0.570017	2.11915	0.0117487	-6.05381	1.53e-09	FALSE	-	FALSE	-	FALSE	-
hsa-miR-30d	MIMAT0000245	C3orf70	-0.519074	2.11915	0.0117487	-4.08877	0.0040731	FALSE	-	FALSE	-	FALSE	-
hsa-miR-30e	MIMAT0000692	C3orf70	-0.522159	2.11915	0.0117487	-3.67906	0.000527046	FALSE	-	FALSE	-	FALSE	-
hsa-miR-29a	MIMAT0000086	C3orf70	-0.516678	2.11915	0.0117487	-3.59987	1.48e-05	FALSE	-	FALSE	-	FALSE	-
hsa-miR-193b	MIMAT0002819	C3orf70	-0.565523	2.11915	0.0117487	-2.11453	7.87e-05	FALSE	-	FALSE	-	FALSE	-
hsa-miR-342-3p	MIMAT0000753	C5orf58	-0.610053	-3.93537	0.00022476	2.3406	0.0190592	FALSE	-	FALSE	-	FALSE	-
hsa-miR-199b-5p	MIMAT0000263	C5orf58	-0.551788	-3.93537	0.00022476	4.57993	0.00988295	FALSE	-	FALSE	-	FALSE	-
hsa-miR-149	MIMAT0000450	C6	-0.530339	-2.39295	0.0468865	2.291	0.0120225	FALSE	-	FALSE	-	FALSE	-
hsa-miR-130b	MIMAT0000691	C6	-0.63037	-2.39295	0.0468865	3.80083	0.00520967	FALSE	-	FALSE	-	FALSE	-
hsa-miR-483-3p	MIMAT0002173	C6	-0.603643	-2.39295	0.0468865	8.10918	0.0126338	FALSE	-	FALSE	-	FALSE	-
hsa-miR-149	MIMAT0000450	C7orf10	-0.551001	-2.10831	1.06e-07	2.291	0.0120225	FALSE	-	FALSE	-	FALSE	-
hsa-miR-483-3p	MIMAT0002173	C7orf10	-0.54327	-2.10831	1.06e-07	8.10918	0.0126338	FALSE	-	FALSE	-	FALSE	-
hsa-miR-342-3p	MIMAT0000753	C8orf12	-0.582745	-2.11417	0.00356354	2.3406	0.0190592	FALSE	-	FALSE	-	FALSE	-
hsa-miR-204	MIMAT0000265	C8orf31	-0.596417	2.7019	1.6e-05	-36.81	0.00154679	TRUE	miRanda,miRWalk,Targetscan	FALSE	-	FALSE	-
hsa-miR-30a*	MIMAT0000088	C8orf31	-0.508019	2.7019	1.6e-05	-18.8146	0.00022834	TRUE	miRanda	FALSE	-	FALSE	-
hsa-miR-30c-2*	MIMAT0004550	C8orf31	-0.554587	2.7019	1.6e-05	-7.05949	0.000128821	TRUE	miRanda,miRWalk	FALSE	-	FALSE	-
hsa-miR-29c	MIMAT0000681	C8orf31	-0.690373	2.7019	1.6e-05	-6.41599	7.63e-10	TRUE	miRanda,miRWalk,Targetscan	FALSE	-	FALSE	-
hsa-miR-29b	MIMAT0000100	C8orf31	-0.754063	2.7019	1.6e-05	-6.05381	1.53e-09	TRUE	miRanda,miRWalk,Targetscan	FALSE	-	FALSE	-
hsa-miR-29a	MIMAT0000086	C8orf31	-0.701615	2.7019	1.6e-05	-3.59987	1.48e-05	TRUE	miRanda,miRWalk,Targetscan	FALSE	-	FALSE	-
hsa-miR-509-5p	MIMAT0004779	C8orf31	-0.500548	2.7019	1.6e-05	-2.87305	0.0406154	TRUE	miRanda	FALSE	-	FALSE	-
hsa-miR-650	MIMAT0003320	C8orf31	-0.566202	2.7019	1.6e-05	-2.82359	0.000641415	TRUE	miRanda	FALSE	-	FALSE	-
hsa-miR-194	MIMAT0000460	C8orf31	-0.577978	2.7019	1.6e-05	-46.2178	9.52e-10	FALSE	-	FALSE	-	FALSE	-
hsa-miR-192	MIMAT0000222	C8orf31	-0.616692	2.7019	1.6e-05	-28.5527	0.00455468	FALSE	-	FALSE	-	FALSE	-
hsa-miR-1973	MIMAT0009448	C8orf31	-0.550466	2.7019	1.6e-05	-22.3522	0.00154679	FALSE	-	FALSE	-	FALSE	-
hsa-miR-514	MIMAT0002883	C8orf31	-0.753935	2.7019	1.6e-05	-9.56105	0.0315166	FALSE	-	FALSE	-	FALSE	-
hsa-miR-138	MIMAT0000430	C8orf31	-0.503317	2.7019	1.6e-05	-6.09319	0.0393204	FALSE	-	FALSE	-	FALSE	-
hsa-miR-3174	MIMAT0015051	C8orf31	-0.526163	2.7019	1.6e-05	-3.91365	0.0040731	FALSE	-	FALSE	-	FALSE	-
hsa-miR-4313	MIMAT0016865	C8orf31	-0.569431	2.7019	1.6e-05	-3.83928	0.0433536	FALSE	-	FALSE	-	FALSE	-
hsa-miR-184	MIMAT0000454	C8orf31	-0.648515	2.7019	1.6e-05	-3.77856	0.0471754	FALSE	-	FALSE	-	FALSE	-
hsa-miR-200b*	MIMAT0004571	C8orf31	-0.535908	2.7019	1.6e-05	-3.1324	0.0190592	FALSE	-	FALSE	-	FALSE	-
hsa-miR-192*	MIMAT0004543	C8orf31	-0.646468	2.7019	1.6e-05	-2.59251	0.0496439	FALSE	-	FALSE	-	FALSE	-
hsa-miR-29c*	MIMAT0004673	C8orf31	-0.528827	2.7019	1.6e-05	-2.48117	0.0315166	FALSE	-	FALSE	-	FALSE	-
hsa-miR-3619	MIMAT0017999	C8orf31	-0.615173	2.7019	1.6e-05	-2.22165	7.57e-06	FALSE	-	FALSE	-	FALSE	-
hsa-miR-22*	MIMAT0004495	C8orf31	-0.580848	2.7019	1.6e-05	-2.18871	3.33e-06	FALSE	-	FALSE	-	FALSE	-
hsa-miR-22	MIMAT0000077	C8orf31	-0.610397	2.7019	1.6e-05	-2.15966	0.0040731	FALSE	-	FALSE	-	FALSE	-
hsa-miR-320d	MIMAT0006764	C8orf46	-0.553622	-2.92378	2.78e-12	3.33924	0.000298489	TRUE	miRanda,miRWalk,Targetscan	FALSE	-	FALSE	-
hsa-miR-320c	MIMAT0005793	C8orf46	-0.597297	-2.92378	2.78e-12	3.59274	3.56e-09	TRUE	miRanda,miRWalk,Targetscan	FALSE	-	FALSE	-
hsa-miR-320e	MIMAT0015072	C8orf46	-0.530686	-2.92378	2.78e-12	2.96208	0.000298489	FALSE	-	FALSE	-	FALSE	-
hsa-miR-130b	MIMAT0000691	C8orf46	-0.551247	-2.92378	2.78e-12	3.80083	0.00520967	FALSE	-	FALSE	-	FALSE	-
hsa-miR-483-3p	MIMAT0002173	C8orf46	-0.604575	-2.92378	2.78e-12	8.10918	0.0126338	FALSE	-	FALSE	-	FALSE	-
hsa-miR-485-3p	MIMAT0002176	C8orf47	-0.531367	-2.10758	0.00557886	2.02334	0.0209151	FALSE	-	FALSE	-	FALSE	-
hsa-miR-1825	MIMAT0006765	C8orf47	-0.52411	-2.10758	0.00557886	2.0258	0.0190592	FALSE	-	FALSE	-	FALSE	-
hsa-miR-3148	MIMAT0015021	C8orf47	-0.658866	-2.10758	0.00557886	2.16406	8.93e-05	FALSE	-	FALSE	-	FALSE	-
hsa-miR-1281	MIMAT0005939	C8orf47	-0.514162	-2.10758	0.00557886	2.16453	0.00789577	FALSE	-	FALSE	-	FALSE	-
hsa-miR-4290	MIMAT0016921	C8orf47	-0.59209	-2.10758	0.00557886	2.16527	0.00455468	FALSE	-	FALSE	-	FALSE	-
hsa-miR-3149	MIMAT0015022	C8orf47	-0.636799	-2.10758	0.00557886	2.31002	0.00144797	FALSE	-	FALSE	-	FALSE	-
hsa-miR-1268	MIMAT0005922	C8orf47	-0.540912	-2.10758	0.00557886	2.50794	7.21e-07	FALSE	-	FALSE	-	FALSE	-
hsa-miR-595	MIMAT0003263	C8orf47	-0.675605	-2.10758	0.00557886	2.56618	0.000369323	FALSE	-	FALSE	-	FALSE	-
hsa-miR-4281	MIMAT0016907	C8orf47	-0.55893	-2.10758	0.00557886	3.00879	0.00234241	FALSE	-	FALSE	-	FALSE	-
hsa-miR-4270	MIMAT0016900	C8orf47	-0.659551	-2.10758	0.00557886	3.25387	7.35e-05	FALSE	-	FALSE	-	FALSE	-
hsa-miR-1225-5p	MIMAT0005572	C8orf47	-0.563352	-2.10758	0.00557886	3.50426	9.16e-06	FALSE	-	FALSE	-	FALSE	-
hsa-miR-320c	MIMAT0005793	C8orf47	-0.566422	-2.10758	0.00557886	3.59274	3.56e-09	FALSE	-	FALSE	-	FALSE	-
hsa-miR-1207-5p	MIMAT0005871	C8orf47	-0.509465	-2.10758	0.00557886	5.1752	0.00144797	FALSE	-	FALSE	-	FALSE	-
hsa-miR-342-3p	MIMAT0000753	C9	-0.618036	-2.66188	0.0191866	2.3406	0.0190592	FALSE	-	FALSE	-	FALSE	-
hsa-miR-29b	MIMAT0000100	C9orf129	-0.610711	2.03394	0.000840237	-6.05381	1.53e-09	FALSE	-	FALSE	-	FALSE	-
hsa-miR-29a	MIMAT0000086	C9orf129	-0.539888	2.03394	0.000840237	-3.59987	1.48e-05	FALSE	-	FALSE	-	FALSE	-
hsa-miR-145	MIMAT0000437	C9orf129	-0.526449	2.03394	0.000840237	-2.30911	0.000190459	FALSE	-	FALSE	-	FALSE	-
hsa-miR-3619	MIMAT0017999	C9orf129	-0.588666	2.03394	0.000840237	-2.22165	7.57e-06	FALSE	-	FALSE	-	FALSE	-
hsa-miR-22	MIMAT0000077	C9orf129	-0.575021	2.03394	0.000840237	-2.15966	0.0040731	FALSE	-	FALSE	-	FALSE	-
hsa-miR-29c	MIMAT0000681	C9orf171	-0.56558	3.41145	4.67e-05	-6.41599	7.63e-10	FALSE	-	FALSE	-	FALSE	-
hsa-miR-29b	MIMAT0000100	C9orf171	-0.670062	3.41145	4.67e-05	-6.05381	1.53e-09	FALSE	-	FALSE	-	FALSE	-
hsa-miR-29a	MIMAT0000086	C9orf171	-0.748133	3.41145	4.67e-05	-3.59987	1.48e-05	FALSE	-	FALSE	-	FALSE	-
hsa-miR-145	MIMAT0000437	C9orf171	-0.54702	3.41145	4.67e-05	-2.30911	0.000190459	FALSE	-	FALSE	-	FALSE	-
hsa-miR-22	MIMAT0000077	C9orf171	-0.696687	3.41145	4.67e-05	-2.15966	0.0040731	FALSE	-	FALSE	-	FALSE	-
hsa-miR-193b	MIMAT0002819	C9orf171	-0.506139	3.41145	4.67e-05	-2.11453	7.87e-05	FALSE	-	FALSE	-	FALSE	-
hsa-miR-342-3p	MIMAT0000753	C9orf24	-0.643356	-4.39465	6.25e-05	2.3406	0.0190592	FALSE	-	FALSE	-	FALSE	-
hsa-miR-320e	MIMAT0015072	C9orf24	-0.588721	-4.39465	6.25e-05	2.96208	0.000298489	FALSE	-	FALSE	-	FALSE	-
hsa-miR-320d	MIMAT0006764	C9orf24	-0.626272	-4.39465	6.25e-05	3.33924	0.000298489	FALSE	-	FALSE	-	FALSE	-
hsa-miR-320c	MIMAT0005793	C9orf24	-0.544614	-4.39465	6.25e-05	3.59274	3.56e-09	FALSE	-	FALSE	-	FALSE	-
hsa-miR-199b-5p	MIMAT0000263	C9orf24	-0.52965	-4.39465	6.25e-05	4.57993	0.00988295	FALSE	-	FALSE	-	FALSE	-
hsa-miR-483-3p	MIMAT0002173	C9orf24	-0.548851	-4.39465	6.25e-05	8.10918	0.0126338	FALSE	-	FALSE	-	FALSE	-
hsa-miR-342-3p	MIMAT0000753	C9orf66	-0.701117	-4.26637	7.57e-13	2.3406	0.0190592	TRUE	miRanda	FALSE	-	FALSE	-
hsa-miR-130b	MIMAT0000691	C9orf66	-0.541607	-4.26637	7.57e-13	3.80083	0.00520967	TRUE	miRanda,Targetscan	FALSE	-	FALSE	-
hsa-miR-199b-5p	MIMAT0000263	C9orf66	-0.50633	-4.26637	7.57e-13	4.57993	0.00988295	TRUE	miRanda,miRDB,miRWalk,Targetscan	FALSE	-	FALSE	-
hsa-miR-342-3p	MIMAT0000753	CA10	-0.554393	-5.70081	8.33e-10	2.3406	0.0190592	FALSE	-	FALSE	-	FALSE	-
hsa-miR-483-3p	MIMAT0002173	CA10	-0.541021	-5.70081	8.33e-10	8.10918	0.0126338	FALSE	-	FALSE	-	FALSE	-
hsa-miR-34b*	MIMAT0000685	CA12	-0.565372	-5.22512	3.77e-11	2.25678	0.0363362	TRUE	miRanda	FALSE	-	FALSE	-
hsa-miR-199b-5p	MIMAT0000263	CA12	-0.644467	-5.22512	3.77e-11	4.57993	0.00988295	TRUE	miRanda,Targetscan	FALSE	-	FALSE	-
hsa-miR-34a	MIMAT0000255	CA12	-0.565908	-5.22512	3.77e-11	5.47031	0.0483291	TRUE	miRanda,Targetscan	FALSE	-	FALSE	-
hsa-miR-29b	MIMAT0000100	CA14	-0.72287	2.68942	7.19e-05	-6.05381	1.53e-09	FALSE	-	FALSE	-	FALSE	-
hsa-miR-29a	MIMAT0000086	CA14	-0.683433	2.68942	7.19e-05	-3.59987	1.48e-05	FALSE	-	FALSE	-	FALSE	-
hsa-miR-145	MIMAT0000437	CA14	-0.534166	2.68942	7.19e-05	-2.30911	0.000190459	FALSE	-	FALSE	-	FALSE	-
hsa-miR-3619	MIMAT0017999	CA14	-0.510289	2.68942	7.19e-05	-2.22165	7.57e-06	FALSE	-	FALSE	-	FALSE	-
hsa-miR-22	MIMAT0000077	CA14	-0.687169	2.68942	7.19e-05	-2.15966	0.0040731	FALSE	-	FALSE	-	FALSE	-
hsa-miR-149	MIMAT0000450	CA2	-0.609669	-5.36175	8.18e-08	2.291	0.0120225	FALSE	-	FALSE	-	FALSE	-
hsa-miR-342-3p	MIMAT0000753	CA2	-0.636718	-5.36175	8.18e-08	2.3406	0.0190592	FALSE	-	FALSE	-	FALSE	-
hsa-miR-320e	MIMAT0015072	CA2	-0.549085	-5.36175	8.18e-08	2.96208	0.000298489	FALSE	-	FALSE	-	FALSE	-
hsa-miR-320d	MIMAT0006764	CA2	-0.565393	-5.36175	8.18e-08	3.33924	0.000298489	FALSE	-	FALSE	-	FALSE	-
hsa-miR-130b	MIMAT0000691	CA2	-0.621486	-5.36175	8.18e-08	3.80083	0.00520967	FALSE	-	FALSE	-	FALSE	-
hsa-miR-199b-5p	MIMAT0000263	CA2	-0.512722	-5.36175	8.18e-08	4.57993	0.00988295	FALSE	-	FALSE	-	FALSE	-
hsa-miR-483-3p	MIMAT0002173	CA2	-0.608085	-5.36175	8.18e-08	8.10918	0.0126338	FALSE	-	FALSE	-	FALSE	-
hsa-miR-1825	MIMAT0006765	CA4	-0.538532	-3.7678	2.32e-06	2.0258	0.0190592	FALSE	-	FALSE	-	FALSE	-
hsa-miR-4290	MIMAT0016921	CA4	-0.506439	-3.7678	2.32e-06	2.16527	0.00455468	FALSE	-	FALSE	-	FALSE	-
hsa-miR-595	MIMAT0003263	CA4	-0.506507	-3.7678	2.32e-06	2.56618	0.000369323	FALSE	-	FALSE	-	FALSE	-
hsa-miR-320e	MIMAT0015072	CA4	-0.508956	-3.7678	2.32e-06	2.96208	0.000298489	FALSE	-	FALSE	-	FALSE	-
hsa-miR-320d	MIMAT0006764	CA4	-0.526824	-3.7678	2.32e-06	3.33924	0.000298489	FALSE	-	FALSE	-	FALSE	-
hsa-miR-320c	MIMAT0005793	CA4	-0.574222	-3.7678	2.32e-06	3.59274	3.56e-09	FALSE	-	FALSE	-	FALSE	-
hsa-miR-342-3p	MIMAT0000753	CABP1	-0.648864	-4.54356	4.67e-11	2.3406	0.0190592	FALSE	-	FALSE	-	FALSE	-
hsa-miR-130b	MIMAT0000691	CABP1	-0.574283	-4.54356	4.67e-11	3.80083	0.00520967	FALSE	-	FALSE	-	FALSE	-
hsa-miR-192	MIMAT0000222	CABYR	-0.659084	2.68161	1.01e-07	-28.5527	0.00455468	TRUE	miRanda	FALSE	-	FALSE	-
hsa-miR-30a*	MIMAT0000088	CABYR	-0.5491	2.68161	1.01e-07	-18.8146	0.00022834	TRUE	miRanda,miRWalk	FALSE	-	FALSE	-
hsa-miR-378	MIMAT0000732	CABYR	-0.55319	2.68161	1.01e-07	-6.71232	0.000839801	TRUE	Targetscan	FALSE	-	FALSE	-
hsa-miR-200a	MIMAT0000682	CABYR	-0.500095	2.68161	1.01e-07	-46.4655	2.79e-13	FALSE	-	FALSE	-	FALSE	-
hsa-miR-194	MIMAT0000460	CABYR	-0.674315	2.68161	1.01e-07	-46.2178	9.52e-10	FALSE	-	FALSE	-	FALSE	-
hsa-miR-204	MIMAT0000265	CABYR	-0.607942	2.68161	1.01e-07	-36.81	0.00154679	FALSE	-	FALSE	-	FALSE	-
hsa-miR-141	MIMAT0000432	CABYR	-0.502985	2.68161	1.01e-07	-31.9336	0.000951205	FALSE	-	FALSE	-	FALSE	-
hsa-miR-429	MIMAT0001536	CABYR	-0.538501	2.68161	1.01e-07	-28.4646	9.52e-10	FALSE	-	FALSE	-	FALSE	-
hsa-miR-1973	MIMAT0009448	CABYR	-0.567559	2.68161	1.01e-07	-22.3522	0.00154679	FALSE	-	FALSE	-	FALSE	-
hsa-miR-200c	MIMAT0000617	CABYR	-0.537328	2.68161	1.01e-07	-21.4575	7.21e-07	FALSE	-	FALSE	-	FALSE	-
hsa-miR-514	MIMAT0002883	CABYR	-0.740151	2.68161	1.01e-07	-9.56105	0.0315166	FALSE	-	FALSE	-	FALSE	-
hsa-miR-30c-2*	MIMAT0004550	CABYR	-0.594925	2.68161	1.01e-07	-7.05949	0.000128821	FALSE	-	FALSE	-	FALSE	-
hsa-miR-29c	MIMAT0000681	CABYR	-0.516578	2.68161	1.01e-07	-6.41599	7.63e-10	FALSE	-	FALSE	-	FALSE	-
hsa-miR-138	MIMAT0000430	CABYR	-0.66093	2.68161	1.01e-07	-6.09319	0.0393204	FALSE	-	FALSE	-	FALSE	-
hsa-miR-29b	MIMAT0000100	CABYR	-0.557091	2.68161	1.01e-07	-6.05381	1.53e-09	FALSE	-	FALSE	-	FALSE	-
hsa-miR-3174	MIMAT0015051	CABYR	-0.600806	2.68161	1.01e-07	-3.91365	0.0040731	FALSE	-	FALSE	-	FALSE	-
hsa-miR-4313	MIMAT0016865	CABYR	-0.592998	2.68161	1.01e-07	-3.83928	0.0433536	FALSE	-	FALSE	-	FALSE	-
hsa-miR-184	MIMAT0000454	CABYR	-0.560814	2.68161	1.01e-07	-3.77856	0.0471754	FALSE	-	FALSE	-	FALSE	-
hsa-miR-4286	MIMAT0016916	CABYR	-0.544911	2.68161	1.01e-07	-3.75103	1.22e-07	FALSE	-	FALSE	-	FALSE	-
hsa-miR-29a	MIMAT0000086	CABYR	-0.530035	2.68161	1.01e-07	-3.59987	1.48e-05	FALSE	-	FALSE	-	FALSE	-
hsa-miR-200b*	MIMAT0004571	CABYR	-0.503573	2.68161	1.01e-07	-3.1324	0.0190592	FALSE	-	FALSE	-	FALSE	-
hsa-miR-509-5p	MIMAT0004779	CABYR	-0.549224	2.68161	1.01e-07	-2.87305	0.0406154	FALSE	-	FALSE	-	FALSE	-
hsa-miR-650	MIMAT0003320	CABYR	-0.652509	2.68161	1.01e-07	-2.82359	0.000641415	FALSE	-	FALSE	-	FALSE	-
hsa-miR-192*	MIMAT0004543	CABYR	-0.687268	2.68161	1.01e-07	-2.59251	0.0496439	FALSE	-	FALSE	-	FALSE	-
hsa-miR-3619	MIMAT0017999	CABYR	-0.572705	2.68161	1.01e-07	-2.22165	7.57e-06	FALSE	-	FALSE	-	FALSE	-
hsa-miR-22	MIMAT0000077	CABYR	-0.521456	2.68161	1.01e-07	-2.15966	0.0040731	FALSE	-	FALSE	-	FALSE	-
hsa-miR-4280	MIMAT0016911	CABYR	-0.506387	2.68161	1.01e-07	-2.08514	0.00616155	FALSE	-	FALSE	-	FALSE	-
hsa-miR-204	MIMAT0000265	CACNA1A	-0.501191	2.0551	1.79e-06	-36.81	0.00154679	TRUE	miRanda	FALSE	-	FALSE	-
hsa-miR-29c	MIMAT0000681	CACNA1A	-0.545677	2.0551	1.79e-06	-6.41599	7.63e-10	TRUE	miRanda,miRWalk	FALSE	-	FALSE	-
hsa-miR-138	MIMAT0000430	CACNA1A	-0.55544	2.0551	1.79e-06	-6.09319	0.0393204	TRUE	miRanda	FALSE	-	FALSE	-
hsa-miR-29b	MIMAT0000100	CACNA1A	-0.593173	2.0551	1.79e-06	-6.05381	1.53e-09	TRUE	miRanda,miRWalk	FALSE	-	FALSE	-
hsa-miR-29a	MIMAT0000086	CACNA1A	-0.514608	2.0551	1.79e-06	-3.59987	1.48e-05	TRUE	miRanda,miRWalk	FALSE	-	FALSE	-
hsa-miR-194	MIMAT0000460	CACNA1A	-0.610666	2.0551	1.79e-06	-46.2178	9.52e-10	FALSE	-	FALSE	-	FALSE	-
hsa-miR-192	MIMAT0000222	CACNA1A	-0.587493	2.0551	1.79e-06	-28.5527	0.00455468	FALSE	-	FALSE	-	FALSE	-
hsa-miR-429	MIMAT0001536	CACNA1A	-0.520147	2.0551	1.79e-06	-28.4646	9.52e-10	FALSE	-	FALSE	-	FALSE	-
hsa-miR-30a*	MIMAT0000088	CACNA1A	-0.505929	2.0551	1.79e-06	-18.8146	0.00022834	FALSE	-	FALSE	-	FALSE	-
hsa-miR-514	MIMAT0002883	CACNA1A	-0.581811	2.0551	1.79e-06	-9.56105	0.0315166	FALSE	-	FALSE	-	FALSE	-
hsa-miR-30c-2*	MIMAT0004550	CACNA1A	-0.567235	2.0551	1.79e-06	-7.05949	0.000128821	FALSE	-	FALSE	-	FALSE	-
hsa-miR-200b*	MIMAT0004571	CACNA1A	-0.534043	2.0551	1.79e-06	-3.1324	0.0190592	FALSE	-	FALSE	-	FALSE	-
hsa-miR-192*	MIMAT0004543	CACNA1A	-0.5614	2.0551	1.79e-06	-2.59251	0.0496439	FALSE	-	FALSE	-	FALSE	-
hsa-miR-3619	MIMAT0017999	CACNA1A	-0.524518	2.0551	1.79e-06	-2.22165	7.57e-06	FALSE	-	FALSE	-	FALSE	-
hsa-miR-192	MIMAT0000222	CACNA1G	-0.534227	2.1588	0.00895528	-28.5527	0.00455468	TRUE	miRanda	FALSE	-	FALSE	-
hsa-miR-138	MIMAT0000430	CACNA1G	-0.635733	2.1588	0.00895528	-6.09319	0.0393204	TRUE	RNA22	FALSE	-	FALSE	-
hsa-miR-650	MIMAT0003320	CACNA1G	-0.586693	2.1588	0.00895528	-2.82359	0.000641415	TRUE	Targetscan	FALSE	-	FALSE	-
hsa-miR-194	MIMAT0000460	CACNA1G	-0.56386	2.1588	0.00895528	-46.2178	9.52e-10	FALSE	-	FALSE	-	FALSE	-
hsa-miR-429	MIMAT0001536	CACNA1G	-0.516955	2.1588	0.00895528	-28.4646	9.52e-10	FALSE	-	FALSE	-	FALSE	-
hsa-miR-1973	MIMAT0009448	CACNA1G	-0.538718	2.1588	0.00895528	-22.3522	0.00154679	FALSE	-	FALSE	-	FALSE	-
hsa-miR-514	MIMAT0002883	CACNA1G	-0.542104	2.1588	0.00895528	-9.56105	0.0315166	FALSE	-	FALSE	-	FALSE	-
hsa-miR-4286	MIMAT0016916	CACNA1G	-0.531388	2.1588	0.00895528	-3.75103	1.22e-07	FALSE	-	FALSE	-	FALSE	-
hsa-miR-126*	MIMAT0000444	CACNA1G	-0.504751	2.1588	0.00895528	-2.70338	0.0126203	FALSE	-	FALSE	-	FALSE	-
hsa-miR-22	MIMAT0000077	CACNB3	-0.57177	2.0967	0.00014861	-2.15966	0.0040731	TRUE	miRanda	FALSE	-	FALSE	-
hsa-miR-514	MIMAT0002883	CACNB3	-0.518492	2.0967	0.00014861	-9.56105	0.0315166	FALSE	-	FALSE	-	FALSE	-
hsa-miR-29b	MIMAT0000100	CACNB3	-0.626741	2.0967	0.00014861	-6.05381	1.53e-09	FALSE	-	FALSE	-	FALSE	-
hsa-miR-4313	MIMAT0016865	CACNB3	-0.576548	2.0967	0.00014861	-3.83928	0.0433536	FALSE	-	FALSE	-	FALSE	-
hsa-miR-29a	MIMAT0000086	CACNB3	-0.611268	2.0967	0.00014861	-3.59987	1.48e-05	FALSE	-	FALSE	-	FALSE	-
hsa-miR-342-3p	MIMAT0000753	CALB1	-0.621685	-10.7391	1.09e-05	2.3406	0.0190592	TRUE	miRanda	FALSE	-	FALSE	-
hsa-miR-320d	MIMAT0006764	CALB1	-0.598197	-10.7391	1.09e-05	3.33924	0.000298489	TRUE	miRanda	FALSE	-	FALSE	-
hsa-miR-320c	MIMAT0005793	CALB1	-0.568802	-10.7391	1.09e-05	3.59274	3.56e-09	TRUE	miRanda	FALSE	-	FALSE	-
hsa-miR-130b	MIMAT0000691	CALB1	-0.504928	-10.7391	1.09e-05	3.80083	0.00520967	TRUE	miRanda,Targetscan	FALSE	-	FALSE	-
hsa-miR-320e	MIMAT0015072	CALB1	-0.573322	-10.7391	1.09e-05	2.96208	0.000298489	FALSE	-	FALSE	-	FALSE	-
hsa-miR-483-3p	MIMAT0002173	CALB1	-0.514717	-10.7391	1.09e-05	8.10918	0.0126338	FALSE	-	FALSE	-	FALSE	-
hsa-miR-342-3p	MIMAT0000753	CALCR	-0.545419	-3.50004	0.0270045	2.3406	0.0190592	FALSE	-	FALSE	-	FALSE	-
hsa-miR-130b	MIMAT0000691	CALCR	-0.57982	-3.50004	0.0270045	3.80083	0.00520967	FALSE	-	FALSE	-	FALSE	-
hsa-miR-200a	MIMAT0000682	CAMK1D	-0.602981	2.41399	0.00760188	-46.4655	2.79e-13	TRUE	miRanda	FALSE	-	FALSE	-
hsa-miR-192	MIMAT0000222	CAMK1D	-0.894856	2.41399	0.00760188	-28.5527	0.00455468	TRUE	miRanda	FALSE	-	FALSE	-
hsa-miR-29c	MIMAT0000681	CAMK1D	-0.59438	2.41399	0.00760188	-6.41599	7.63e-10	TRUE	miRanda,Targetscan	FALSE	-	FALSE	-
hsa-miR-138	MIMAT0000430	CAMK1D	-0.60204	2.41399	0.00760188	-6.09319	0.0393204	TRUE	miRanda	FALSE	-	FALSE	-
hsa-miR-532-3p	MIMAT0004780	CAMK1D	-0.560115	2.41399	0.00760188	-5.3682	0.00494485	TRUE	miRanda,miRWalk	FALSE	-	FALSE	-
hsa-miR-362-3p	MIMAT0004683	CAMK1D	-0.510777	2.41399	0.00760188	-3.80364	0.00120223	TRUE	miRanda,miRDB,Targetscan	FALSE	-	FALSE	-
hsa-miR-509-5p	MIMAT0004779	CAMK1D	-0.660529	2.41399	0.00760188	-2.87305	0.0406154	TRUE	miRanda	FALSE	-	FALSE	-
hsa-miR-650	MIMAT0003320	CAMK1D	-0.643382	2.41399	0.00760188	-2.82359	0.000641415	TRUE	miRanda	FALSE	-	FALSE	-
hsa-miR-192*	MIMAT0004543	CAMK1D	-0.841588	2.41399	0.00760188	-2.59251	0.0496439	TRUE	miRanda	FALSE	-	FALSE	-
hsa-miR-665	MIMAT0004952	CAMK1D	-0.515836	2.41399	0.00760188	-2.17957	0.0468347	TRUE	miRanda	FALSE	-	FALSE	-
hsa-miR-194	MIMAT0000460	CAMK1D	-0.837662	2.41399	0.00760188	-46.2178	9.52e-10	FALSE	-	FALSE	-	FALSE	-
hsa-miR-204	MIMAT0000265	CAMK1D	-0.825112	2.41399	0.00760188	-36.81	0.00154679	FALSE	-	FALSE	-	FALSE	-
hsa-miR-200b	MIMAT0000318	CAMK1D	-0.578891	2.41399	0.00760188	-35.3775	3.1e-06	FALSE	-	FALSE	-	FALSE	-
hsa-miR-429	MIMAT0001536	CAMK1D	-0.627137	2.41399	0.00760188	-28.4646	9.52e-10	FALSE	-	FALSE	-	FALSE	-
hsa-miR-1973	MIMAT0009448	CAMK1D	-0.646494	2.41399	0.00760188	-22.3522	0.00154679	FALSE	-	FALSE	-	FALSE	-
hsa-miR-30a*	MIMAT0000088	CAMK1D	-0.700696	2.41399	0.00760188	-18.8146	0.00022834	FALSE	-	FALSE	-	FALSE	-
hsa-miR-30a	MIMAT0000087	CAMK1D	-0.619592	2.41399	0.00760188	-16.9463	7.4e-12	FALSE	-	FALSE	-	FALSE	-
hsa-miR-514	MIMAT0002883	CAMK1D	-0.855924	2.41399	0.00760188	-9.56105	0.0315166	FALSE	-	FALSE	-	FALSE	-
hsa-miR-30c-2*	MIMAT0004550	CAMK1D	-0.781566	2.41399	0.00760188	-7.05949	0.000128821	FALSE	-	FALSE	-	FALSE	-
hsa-miR-30c	MIMAT0000244	CAMK1D	-0.70809	2.41399	0.00760188	-7.00515	8.66e-09	FALSE	-	FALSE	-	FALSE	-
hsa-miR-378	MIMAT0000732	CAMK1D	-0.517914	2.41399	0.00760188	-6.71232	0.000839801	FALSE	-	FALSE	-	FALSE	-
hsa-miR-30e*	MIMAT0000693	CAMK1D	-0.635873	2.41399	0.00760188	-6.40949	2.86e-08	FALSE	-	FALSE	-	FALSE	-
hsa-miR-30b	MIMAT0000420	CAMK1D	-0.510839	2.41399	0.00760188	-5.18561	2.83e-06	FALSE	-	FALSE	-	FALSE	-
hsa-miR-30d	MIMAT0000245	CAMK1D	-0.604825	2.41399	0.00760188	-4.08877	0.0040731	FALSE	-	FALSE	-	FALSE	-
hsa-miR-3174	MIMAT0015051	CAMK1D	-0.623206	2.41399	0.00760188	-3.91365	0.0040731	FALSE	-	FALSE	-	FALSE	-
hsa-miR-4313	MIMAT0016865	CAMK1D	-0.541907	2.41399	0.00760188	-3.83928	0.0433536	FALSE	-	FALSE	-	FALSE	-
hsa-miR-184	MIMAT0000454	CAMK1D	-0.744439	2.41399	0.00760188	-3.77856	0.0471754	FALSE	-	FALSE	-	FALSE	-
hsa-miR-4286	MIMAT0016916	CAMK1D	-0.507832	2.41399	0.00760188	-3.75103	1.22e-07	FALSE	-	FALSE	-	FALSE	-
hsa-miR-30e	MIMAT0000692	CAMK1D	-0.584109	2.41399	0.00760188	-3.67906	0.000527046	FALSE	-	FALSE	-	FALSE	-
hsa-miR-200b*	MIMAT0004571	CAMK1D	-0.619969	2.41399	0.00760188	-3.1324	0.0190592	FALSE	-	FALSE	-	FALSE	-
hsa-miR-29c*	MIMAT0004673	CAMK1D	-0.594893	2.41399	0.00760188	-2.48117	0.0315166	FALSE	-	FALSE	-	FALSE	-
hsa-miR-4254	MIMAT0016884	CAMK1D	-0.503594	2.41399	0.00760188	-2.23216	0.044083	FALSE	-	FALSE	-	FALSE	-
hsa-miR-4280	MIMAT0016911	CAMK1D	-0.510349	2.41399	0.00760188	-2.08514	0.00616155	FALSE	-	FALSE	-	FALSE	-
hsa-miR-638	MIMAT0003308	CAMSAP3	-0.545169	-2.1556	0.00466379	2.46194	0.00455468	FALSE	-	FALSE	-	FALSE	-
hsa-miR-1268	MIMAT0005922	CAMSAP3	-0.630101	-2.1556	0.00466379	2.50794	7.21e-07	FALSE	-	FALSE	-	FALSE	-
hsa-miR-382	MIMAT0000737	CAMSAP3	-0.530484	-2.1556	0.00466379	2.51265	0.000951205	FALSE	-	FALSE	-	FALSE	-
hsa-miR-595	MIMAT0003263	CAMSAP3	-0.531965	-2.1556	0.00466379	2.56618	0.000369323	FALSE	-	FALSE	-	FALSE	-
hsa-miR-4281	MIMAT0016907	CAMSAP3	-0.664546	-2.1556	0.00466379	3.00879	0.00234241	FALSE	-	FALSE	-	FALSE	-
hsa-miR-4270	MIMAT0016900	CAMSAP3	-0.772582	-2.1556	0.00466379	3.25387	7.35e-05	FALSE	-	FALSE	-	FALSE	-
hsa-miR-1225-5p	MIMAT0005572	CAMSAP3	-0.689356	-2.1556	0.00466379	3.50426	9.16e-06	FALSE	-	FALSE	-	FALSE	-
hsa-miR-1207-5p	MIMAT0005871	CAMSAP3	-0.707482	-2.1556	0.00466379	5.1752	0.00144797	FALSE	-	FALSE	-	FALSE	-
hsa-miR-34a	MIMAT0000255	CAMSAP3	-0.596625	-2.1556	0.00466379	5.47031	0.0483291	FALSE	-	FALSE	-	FALSE	-
hsa-miR-149	MIMAT0000450	CAPN12	-0.556718	-3.70939	8.2e-05	2.291	0.0120225	TRUE	miRanda	FALSE	-	FALSE	-
hsa-miR-342-3p	MIMAT0000753	CAPN12	-0.512494	-3.70939	8.2e-05	2.3406	0.0190592	FALSE	-	FALSE	-	FALSE	-
hsa-miR-130b	MIMAT0000691	CAPN12	-0.570414	-3.70939	8.2e-05	3.80083	0.00520967	FALSE	-	FALSE	-	FALSE	-
hsa-miR-483-3p	MIMAT0002173	CAPN12	-0.588905	-3.70939	8.2e-05	8.10918	0.0126338	FALSE	-	FALSE	-	FALSE	-
hsa-miR-199b-5p	MIMAT0000263	CAPN13	-0.530736	-4.25412	3.53e-12	4.57993	0.00988295	TRUE	miRanda,miRWalk,Targetscan	FALSE	-	FALSE	-
hsa-miR-342-3p	MIMAT0000753	CAPN13	-0.630071	-4.25412	3.53e-12	2.3406	0.0190592	FALSE	-	FALSE	-	FALSE	-
hsa-miR-320e	MIMAT0015072	CAPN13	-0.503588	-4.25412	3.53e-12	2.96208	0.000298489	FALSE	-	FALSE	-	FALSE	-
hsa-miR-320d	MIMAT0006764	CAPN13	-0.538644	-4.25412	3.53e-12	3.33924	0.000298489	FALSE	-	FALSE	-	FALSE	-
hsa-miR-320c	MIMAT0005793	CAPN13	-0.514912	-4.25412	3.53e-12	3.59274	3.56e-09	FALSE	-	FALSE	-	FALSE	-
hsa-miR-130b	MIMAT0000691	CAPN13	-0.547802	-4.25412	3.53e-12	3.80083	0.00520967	FALSE	-	FALSE	-	FALSE	-
hsa-miR-483-3p	MIMAT0002173	CAPN13	-0.524714	-4.25412	3.53e-12	8.10918	0.0126338	FALSE	-	FALSE	-	FALSE	-
hsa-miR-149	MIMAT0000450	CAPZA3	-0.549509	-2.4183	0.00204418	2.291	0.0120225	FALSE	-	FALSE	-	FALSE	-
hsa-miR-342-3p	MIMAT0000753	CAPZA3	-0.58644	-2.4183	0.00204418	2.3406	0.0190592	FALSE	-	FALSE	-	FALSE	-
hsa-miR-130b	MIMAT0000691	CAPZA3	-0.510988	-2.4183	0.00204418	3.80083	0.00520967	FALSE	-	FALSE	-	FALSE	-
hsa-miR-194	MIMAT0000460	CASC15	-0.551797	2.67913	3.75e-05	-46.2178	9.52e-10	FALSE	-	FALSE	-	FALSE	-
hsa-miR-192	MIMAT0000222	CASC15	-0.561663	2.67913	3.75e-05	-28.5527	0.00455468	FALSE	-	FALSE	-	FALSE	-
hsa-miR-1973	MIMAT0009448	CASC15	-0.531107	2.67913	3.75e-05	-22.3522	0.00154679	FALSE	-	FALSE	-	FALSE	-
hsa-miR-514	MIMAT0002883	CASC15	-0.667708	2.67913	3.75e-05	-9.56105	0.0315166	FALSE	-	FALSE	-	FALSE	-
hsa-miR-4313	MIMAT0016865	CASC15	-0.641555	2.67913	3.75e-05	-3.83928	0.0433536	FALSE	-	FALSE	-	FALSE	-
hsa-miR-650	MIMAT0003320	CASC15	-0.607299	2.67913	3.75e-05	-2.82359	0.000641415	FALSE	-	FALSE	-	FALSE	-
hsa-miR-192*	MIMAT0004543	CASC15	-0.555282	2.67913	3.75e-05	-2.59251	0.0496439	FALSE	-	FALSE	-	FALSE	-
hsa-miR-342-3p	MIMAT0000753	CASC16	-0.516406	-2.43854	0.000673721	2.3406	0.0190592	FALSE	-	FALSE	-	FALSE	-
hsa-miR-149	MIMAT0000450	CASR	-0.588063	-6.53848	2.65e-05	2.291	0.0120225	TRUE	miRanda,miRWalk,Targetscan	FALSE	-	FALSE	-
hsa-miR-342-3p	MIMAT0000753	CASR	-0.51375	-6.53848	2.65e-05	2.3406	0.0190592	TRUE	miRanda	FALSE	-	FALSE	-
hsa-miR-130b	MIMAT0000691	CASR	-0.501552	-6.53848	2.65e-05	3.80083	0.00520967	TRUE	Targetscan	FALSE	-	FALSE	-
hsa-miR-483-3p	MIMAT0002173	CASR	-0.67306	-6.53848	2.65e-05	8.10918	0.0126338	FALSE	-	FALSE	-	FALSE	-
hsa-miR-149	MIMAT0000450	CASZ1	-0.518322	-2.02001	2.38e-11	2.291	0.0120225	TRUE	miRanda,miRWalk,Targetscan	FALSE	-	FALSE	-
hsa-miR-342-3p	MIMAT0000753	CASZ1	-0.537884	-2.02001	2.38e-11	2.3406	0.0190592	TRUE	miRanda	FALSE	-	FALSE	-
hsa-miR-483-3p	MIMAT0002173	CASZ1	-0.592877	-2.02001	2.38e-11	8.10918	0.0126338	TRUE	miRanda,miRWalk,Targetscan	FALSE	-	FALSE	-
hsa-miR-130b	MIMAT0000691	CASZ1	-0.570777	-2.02001	2.38e-11	3.80083	0.00520967	FALSE	-	FALSE	-	FALSE	-
hsa-miR-320c	MIMAT0005793	CBLC	-0.534513	-3.34972	1.51e-08	3.59274	3.56e-09	FALSE	-	FALSE	-	FALSE	-
hsa-miR-204	MIMAT0000265	CBX2	-0.520949	2.01736	0.00113201	-36.81	0.00154679	TRUE	miRanda,Targetscan	FALSE	-	FALSE	-
hsa-miR-29c	MIMAT0000681	CBX2	-0.620749	2.01736	0.00113201	-6.41599	7.63e-10	TRUE	miRanda,miRWalk,Targetscan	FALSE	-	TRUE	TargetScan,PicTar
hsa-miR-29b	MIMAT0000100	CBX2	-0.666516	2.01736	0.00113201	-6.05381	1.53e-09	TRUE	miRanda,miRWalk,Targetscan	FALSE	-	TRUE	TargetScan,PicTar
hsa-miR-29a	MIMAT0000086	CBX2	-0.692955	2.01736	0.00113201	-3.59987	1.48e-05	TRUE	miRanda,miRWalk,Targetscan	FALSE	-	TRUE	TargetScan,PicTar
hsa-miR-650	MIMAT0003320	CBX2	-0.524681	2.01736	0.00113201	-2.82359	0.000641415	TRUE	miRanda,miRWalk,Targetscan	FALSE	-	FALSE	-
hsa-miR-192*	MIMAT0004543	CBX2	-0.518193	2.01736	0.00113201	-2.59251	0.0496439	TRUE	miRanda,miRWalk	FALSE	-	FALSE	-
hsa-miR-22	MIMAT0000077	CBX2	-0.671523	2.01736	0.00113201	-2.15966	0.0040731	TRUE	miRanda,Targetscan	FALSE	-	FALSE	-
hsa-miR-193b	MIMAT0002819	CBX2	-0.565138	2.01736	0.00113201	-2.11453	7.87e-05	TRUE	miRanda,miRWalk,Targetscan	FALSE	-	FALSE	-
hsa-miR-514	MIMAT0002883	CBX2	-0.572443	2.01736	0.00113201	-9.56105	0.0315166	FALSE	-	FALSE	-	FALSE	-
hsa-miR-4313	MIMAT0016865	CBX2	-0.512953	2.01736	0.00113201	-3.83928	0.0433536	FALSE	-	FALSE	-	FALSE	-
hsa-miR-3619	MIMAT0017999	CBX2	-0.570459	2.01736	0.00113201	-2.22165	7.57e-06	FALSE	-	FALSE	-	FALSE	-
hsa-miR-204	MIMAT0000265	CCDC136	-0.549735	2.42794	1.36e-08	-36.81	0.00154679	FALSE	-	FALSE	-	FALSE	-
hsa-miR-200b	MIMAT0000318	CCDC136	-0.50564	2.42794	1.36e-08	-35.3775	3.1e-06	FALSE	-	FALSE	-	FALSE	-
hsa-miR-192	MIMAT0000222	CCDC136	-0.531848	2.42794	1.36e-08	-28.5527	0.00455468	FALSE	-	FALSE	-	FALSE	-
hsa-miR-429	MIMAT0001536	CCDC136	-0.509486	2.42794	1.36e-08	-28.4646	9.52e-10	FALSE	-	FALSE	-	FALSE	-
hsa-miR-514	MIMAT0002883	CCDC136	-0.587448	2.42794	1.36e-08	-9.56105	0.0315166	FALSE	-	FALSE	-	FALSE	-
hsa-miR-29c	MIMAT0000681	CCDC136	-0.55912	2.42794	1.36e-08	-6.41599	7.63e-10	FALSE	-	FALSE	-	FALSE	-
hsa-miR-4313	MIMAT0016865	CCDC136	-0.572164	2.42794	1.36e-08	-3.83928	0.0433536	FALSE	-	FALSE	-	FALSE	-
hsa-miR-29a	MIMAT0000086	CCDC136	-0.519667	2.42794	1.36e-08	-3.59987	1.48e-05	FALSE	-	FALSE	-	FALSE	-
hsa-miR-650	MIMAT0003320	CCDC136	-0.642985	2.42794	1.36e-08	-2.82359	0.000641415	FALSE	-	FALSE	-	FALSE	-
hsa-miR-192*	MIMAT0004543	CCDC136	-0.561675	2.42794	1.36e-08	-2.59251	0.0496439	FALSE	-	FALSE	-	FALSE	-
hsa-miR-3619	MIMAT0017999	CCDC136	-0.514671	2.42794	1.36e-08	-2.22165	7.57e-06	FALSE	-	FALSE	-	FALSE	-
hsa-miR-382	MIMAT0000737	CCDC148	-0.559175	-2.83422	3.43e-08	2.51265	0.000951205	TRUE	miRanda,miRWalk,RNA22,Targetscan	FALSE	-	FALSE	-
hsa-miR-3148	MIMAT0015021	CCDC148	-0.64682	-2.83422	3.43e-08	2.16406	8.93e-05	FALSE	-	FALSE	-	FALSE	-
hsa-miR-4290	MIMAT0016921	CCDC148	-0.552492	-2.83422	3.43e-08	2.16527	0.00455468	FALSE	-	FALSE	-	FALSE	-
hsa-miR-3149	MIMAT0015022	CCDC148	-0.613161	-2.83422	3.43e-08	2.31002	0.00144797	FALSE	-	FALSE	-	FALSE	-
hsa-miR-1268	MIMAT0005922	CCDC148	-0.551666	-2.83422	3.43e-08	2.50794	7.21e-07	FALSE	-	FALSE	-	FALSE	-
hsa-miR-595	MIMAT0003263	CCDC148	-0.64854	-2.83422	3.43e-08	2.56618	0.000369323	FALSE	-	FALSE	-	FALSE	-
hsa-miR-4281	MIMAT0016907	CCDC148	-0.616376	-2.83422	3.43e-08	3.00879	0.00234241	FALSE	-	FALSE	-	FALSE	-
hsa-miR-4270	MIMAT0016900	CCDC148	-0.652727	-2.83422	3.43e-08	3.25387	7.35e-05	FALSE	-	FALSE	-	FALSE	-
hsa-miR-1225-5p	MIMAT0005572	CCDC148	-0.611561	-2.83422	3.43e-08	3.50426	9.16e-06	FALSE	-	FALSE	-	FALSE	-
hsa-miR-320c	MIMAT0005793	CCDC148	-0.532793	-2.83422	3.43e-08	3.59274	3.56e-09	FALSE	-	FALSE	-	FALSE	-
hsa-miR-1207-5p	MIMAT0005871	CCDC148	-0.616764	-2.83422	3.43e-08	5.1752	0.00144797	FALSE	-	FALSE	-	FALSE	-
hsa-miR-34a	MIMAT0000255	CCDC148	-0.55581	-2.83422	3.43e-08	5.47031	0.0483291	FALSE	-	FALSE	-	FALSE	-
hsa-miR-320c	MIMAT0005793	CCDC178	-0.570612	-2.02206	4.94e-06	3.59274	3.56e-09	FALSE	-	FALSE	-	FALSE	-
hsa-miR-378	MIMAT0000732	CCDC3	-0.546864	2.6516	0.00462308	-6.71232	0.000839801	TRUE	miRanda,miRWalk,Targetscan	FALSE	-	FALSE	-
hsa-miR-138	MIMAT0000430	CCDC3	-0.526905	2.6516	0.00462308	-6.09319	0.0393204	TRUE	miRanda,miRWalk,Targetscan	FALSE	-	FALSE	-
hsa-miR-650	MIMAT0003320	CCDC3	-0.504506	2.6516	0.00462308	-2.82359	0.000641415	TRUE	miRanda	FALSE	-	FALSE	-
hsa-miR-1973	MIMAT0009448	CCDC3	-0.585142	2.6516	0.00462308	-22.3522	0.00154679	FALSE	-	FALSE	-	FALSE	-
hsa-miR-514b-5p	MIMAT0015087	CCDC3	-0.533762	2.6516	0.00462308	-4.34316	0.014236	FALSE	-	FALSE	-	FALSE	-
hsa-miR-3174	MIMAT0015051	CCDC3	-0.579261	2.6516	0.00462308	-3.91365	0.0040731	FALSE	-	FALSE	-	FALSE	-
hsa-miR-184	MIMAT0000454	CCDC3	-0.600779	2.6516	0.00462308	-3.77856	0.0471754	FALSE	-	FALSE	-	FALSE	-
hsa-miR-509-5p	MIMAT0004779	CCDC3	-0.542652	2.6516	0.00462308	-2.87305	0.0406154	FALSE	-	FALSE	-	FALSE	-
hsa-miR-342-3p	MIMAT0000753	CCDC64	-0.608664	-3.25276	0.0141208	2.3406	0.0190592	FALSE	-	FALSE	-	FALSE	-
hsa-miR-320e	MIMAT0015072	CCDC64	-0.571726	-3.25276	0.0141208	2.96208	0.000298489	FALSE	-	FALSE	-	FALSE	-
hsa-miR-320d	MIMAT0006764	CCDC64	-0.58073	-3.25276	0.0141208	3.33924	0.000298489	FALSE	-	FALSE	-	FALSE	-
hsa-miR-320c	MIMAT0005793	CCDC64	-0.540917	-3.25276	0.0141208	3.59274	3.56e-09	FALSE	-	FALSE	-	FALSE	-
hsa-miR-342-3p	MIMAT0000753	CCDC64B	-0.57309	-2.19518	0.0010031	2.3406	0.0190592	FALSE	-	FALSE	-	FALSE	-
hsa-miR-200a	MIMAT0000682	CCDC88A	-0.786026	2.67708	3.53e-06	-46.4655	2.79e-13	TRUE	miRWalk,Targetscan	FALSE	-	FALSE	-
hsa-miR-204	MIMAT0000265	CCDC88A	-0.819078	2.67708	3.53e-06	-36.81	0.00154679	TRUE	miRWalk,Targetscan	FALSE	-	FALSE	-
hsa-miR-200b	MIMAT0000318	CCDC88A	-0.767425	2.67708	3.53e-06	-35.3775	3.1e-06	TRUE	Targetscan	FALSE	-	FALSE	-
hsa-miR-141	MIMAT0000432	CCDC88A	-0.563387	2.67708	3.53e-06	-31.9336	0.000951205	TRUE	miRWalk,Targetscan	FALSE	-	FALSE	-
hsa-miR-429	MIMAT0001536	CCDC88A	-0.806644	2.67708	3.53e-06	-28.4646	9.52e-10	TRUE	Targetscan	FALSE	-	FALSE	-
hsa-miR-200c	MIMAT0000617	CCDC88A	-0.586836	2.67708	3.53e-06	-21.4575	7.21e-07	TRUE	Targetscan	FALSE	-	FALSE	-
hsa-miR-30a*	MIMAT0000088	CCDC88A	-0.84078	2.67708	3.53e-06	-18.8146	0.00022834	TRUE	miRWalk	FALSE	-	FALSE	-
hsa-miR-30a	MIMAT0000087	CCDC88A	-0.786587	2.67708	3.53e-06	-16.9463	7.4e-12	TRUE	Targetscan	FALSE	-	FALSE	-
hsa-miR-514	MIMAT0002883	CCDC88A	-0.805488	2.67708	3.53e-06	-9.56105	0.0315166	TRUE	Targetscan	FALSE	-	FALSE	-
hsa-miR-30c	MIMAT0000244	CCDC88A	-0.698652	2.67708	3.53e-06	-7.00515	8.66e-09	TRUE	Targetscan	FALSE	-	FALSE	-
hsa-miR-29c	MIMAT0000681	CCDC88A	-0.659819	2.67708	3.53e-06	-6.41599	7.63e-10	TRUE	miRWalk,Targetscan	FALSE	-	FALSE	-
hsa-miR-30e*	MIMAT0000693	CCDC88A	-0.656418	2.67708	3.53e-06	-6.40949	2.86e-08	TRUE	miRWalk	FALSE	-	FALSE	-
hsa-miR-138	MIMAT0000430	CCDC88A	-0.596518	2.67708	3.53e-06	-6.09319	0.0393204	TRUE	Targetscan	FALSE	-	FALSE	-
hsa-miR-29b	MIMAT0000100	CCDC88A	-0.604555	2.67708	3.53e-06	-6.05381	1.53e-09	TRUE	miRWalk,Targetscan	FALSE	-	FALSE	-
hsa-miR-30b	MIMAT0000420	CCDC88A	-0.519177	2.67708	3.53e-06	-5.18561	2.83e-06	TRUE	Targetscan	FALSE	-	FALSE	-
hsa-miR-532-5p	MIMAT0002888	CCDC88A	-0.534732	2.67708	3.53e-06	-4.15879	0.000754552	TRUE	miRWalk,Targetscan	FALSE	-	FALSE	-
hsa-miR-30d	MIMAT0000245	CCDC88A	-0.677789	2.67708	3.53e-06	-4.08877	0.0040731	TRUE	Targetscan	FALSE	-	FALSE	-
hsa-miR-502-3p	MIMAT0004775	CCDC88A	-0.578071	2.67708	3.53e-06	-3.83844	0.0195059	TRUE	miRWalk,Targetscan	FALSE	-	FALSE	-
hsa-miR-362-3p	MIMAT0004683	CCDC88A	-0.643326	2.67708	3.53e-06	-3.80364	0.00120223	TRUE	Targetscan	FALSE	-	FALSE	-
hsa-miR-362-5p	MIMAT0000705	CCDC88A	-0.57145	2.67708	3.53e-06	-3.72617	0.0195059	TRUE	miRWalk	FALSE	-	FALSE	-
hsa-miR-30e	MIMAT0000692	CCDC88A	-0.613329	2.67708	3.53e-06	-3.67906	0.000527046	TRUE	Targetscan	FALSE	-	FALSE	-
hsa-miR-29a	MIMAT0000086	CCDC88A	-0.5717	2.67708	3.53e-06	-3.59987	1.48e-05	TRUE	miRWalk,Targetscan	FALSE	-	FALSE	-
hsa-miR-660	MIMAT0003338	CCDC88A	-0.543281	2.67708	3.53e-06	-3.1577	0.00404992	TRUE	miRWalk,Targetscan	FALSE	-	FALSE	-
hsa-miR-200b*	MIMAT0004571	CCDC88A	-0.743966	2.67708	3.53e-06	-3.1324	0.0190592	TRUE	miRWalk	FALSE	-	FALSE	-
hsa-miR-509-3-5p	MIMAT0004975	CCDC88A	-0.51172	2.67708	3.53e-06	-2.88187	0.0368071	TRUE	Targetscan	FALSE	-	FALSE	-
hsa-miR-509-5p	MIMAT0004779	CCDC88A	-0.628135	2.67708	3.53e-06	-2.87305	0.0406154	TRUE	Targetscan	FALSE	-	FALSE	-
hsa-miR-194	MIMAT0000460	CCDC88A	-0.758681	2.67708	3.53e-06	-46.2178	9.52e-10	FALSE	-	FALSE	-	FALSE	-
hsa-miR-192	MIMAT0000222	CCDC88A	-0.794945	2.67708	3.53e-06	-28.5527	0.00455468	FALSE	-	FALSE	-	FALSE	-
hsa-miR-1973	MIMAT0009448	CCDC88A	-0.566815	2.67708	3.53e-06	-22.3522	0.00154679	FALSE	-	FALSE	-	FALSE	-
hsa-miR-30c-2*	MIMAT0004550	CCDC88A	-0.840027	2.67708	3.53e-06	-7.05949	0.000128821	FALSE	-	FALSE	-	FALSE	-
hsa-miR-532-3p	MIMAT0004780	CCDC88A	-0.574599	2.67708	3.53e-06	-5.3682	0.00494485	FALSE	-	FALSE	-	FALSE	-
hsa-miR-3174	MIMAT0015051	CCDC88A	-0.596221	2.67708	3.53e-06	-3.91365	0.0040731	FALSE	-	FALSE	-	FALSE	-
hsa-miR-184	MIMAT0000454	CCDC88A	-0.649077	2.67708	3.53e-06	-3.77856	0.0471754	FALSE	-	FALSE	-	FALSE	-
hsa-miR-650	MIMAT0003320	CCDC88A	-0.592384	2.67708	3.53e-06	-2.82359	0.000641415	FALSE	-	FALSE	-	FALSE	-
hsa-miR-500a*	MIMAT0002871	CCDC88A	-0.594533	2.67708	3.53e-06	-2.69328	0.0492036	FALSE	-	FALSE	-	FALSE	-
hsa-miR-192*	MIMAT0004543	CCDC88A	-0.748879	2.67708	3.53e-06	-2.59251	0.0496439	FALSE	-	FALSE	-	FALSE	-
hsa-miR-29c*	MIMAT0004673	CCDC88A	-0.587511	2.67708	3.53e-06	-2.48117	0.0315166	FALSE	-	FALSE	-	FALSE	-
hsa-miR-455-5p	MIMAT0003150	CCDC88A	-0.533483	2.67708	3.53e-06	-2.36193	0.012181	FALSE	-	FALSE	-	FALSE	-
hsa-miR-665	MIMAT0004952	CCDC88A	-0.529276	2.67708	3.53e-06	-2.17957	0.0468347	FALSE	-	FALSE	-	FALSE	-
hsa-miR-4280	MIMAT0016911	CCDC88A	-0.525402	2.67708	3.53e-06	-2.08514	0.00616155	FALSE	-	FALSE	-	FALSE	-
hsa-miR-29c	MIMAT0000681	CCK	-0.514359	3.09757	0.000814656	-6.41599	7.63e-10	FALSE	-	FALSE	-	FALSE	-
hsa-miR-193b	MIMAT0002819	CCK	-0.701997	3.09757	0.000814656	-2.11453	7.87e-05	FALSE	-	FALSE	-	FALSE	-
hsa-miR-194	MIMAT0000460	CCL18	-0.61636	5.56075	0.0156861	-46.2178	9.52e-10	FALSE	-	FALSE	-	FALSE	-
hsa-miR-204	MIMAT0000265	CCL18	-0.541118	5.56075	0.0156861	-36.81	0.00154679	FALSE	-	FALSE	-	FALSE	-
hsa-miR-192	MIMAT0000222	CCL18	-0.568875	5.56075	0.0156861	-28.5527	0.00455468	FALSE	-	FALSE	-	FALSE	-
hsa-miR-30c	MIMAT0000244	CCL18	-0.622796	5.56075	0.0156861	-7.00515	8.66e-09	FALSE	-	FALSE	-	FALSE	-
hsa-miR-30e*	MIMAT0000693	CCL18	-0.609571	5.56075	0.0156861	-6.40949	2.86e-08	FALSE	-	FALSE	-	FALSE	-
hsa-miR-4284	MIMAT0016915	CCL18	-0.589991	5.56075	0.0156861	-5.84348	0.00234241	FALSE	-	FALSE	-	FALSE	-
hsa-miR-30b	MIMAT0000420	CCL18	-0.605059	5.56075	0.0156861	-5.18561	2.83e-06	FALSE	-	FALSE	-	FALSE	-
hsa-miR-363	MIMAT0000707	CCL18	-0.577042	5.56075	0.0156861	-2.52828	0.0236749	FALSE	-	FALSE	-	FALSE	-
hsa-miR-4254	MIMAT0016884	CCL18	-0.537044	5.56075	0.0156861	-2.23216	0.044083	FALSE	-	FALSE	-	FALSE	-
hsa-miR-23b	MIMAT0000418	CCL18	-0.507049	5.56075	0.0156861	-2.22707	0.000137514	FALSE	-	FALSE	-	FALSE	-
hsa-miR-342-3p	MIMAT0000753	CCNI2	-0.567767	-3.98177	3.12e-05	2.3406	0.0190592	FALSE	-	FALSE	-	FALSE	-
hsa-miR-130b	MIMAT0000691	CCNI2	-0.57688	-3.98177	3.12e-05	3.80083	0.00520967	FALSE	-	FALSE	-	FALSE	-
hsa-miR-23b	MIMAT0000418	CCR1	-0.596241	2.21894	0.037085	-2.22707	0.000137514	TRUE	miRanda	FALSE	-	FALSE	-
hsa-miR-194	MIMAT0000460	CCR1	-0.554991	2.21894	0.037085	-46.2178	9.52e-10	FALSE	-	FALSE	-	FALSE	-
hsa-miR-192	MIMAT0000222	CCR1	-0.525891	2.21894	0.037085	-28.5527	0.00455468	FALSE	-	FALSE	-	FALSE	-
hsa-miR-30c	MIMAT0000244	CCR1	-0.604336	2.21894	0.037085	-7.00515	8.66e-09	FALSE	-	FALSE	-	FALSE	-
hsa-miR-30e*	MIMAT0000693	CCR1	-0.606493	2.21894	0.037085	-6.40949	2.86e-08	FALSE	-	FALSE	-	FALSE	-
hsa-miR-4284	MIMAT0016915	CCR1	-0.505276	2.21894	0.037085	-5.84348	0.00234241	FALSE	-	FALSE	-	FALSE	-
hsa-miR-30b	MIMAT0000420	CCR1	-0.603384	2.21894	0.037085	-5.18561	2.83e-06	FALSE	-	FALSE	-	FALSE	-
hsa-miR-363	MIMAT0000707	CCR1	-0.519891	2.21894	0.037085	-2.52828	0.0236749	FALSE	-	FALSE	-	FALSE	-
hsa-miR-194	MIMAT0000460	CD14	-0.593516	2.21654	0.00927087	-46.2178	9.52e-10	FALSE	-	FALSE	-	FALSE	-
hsa-miR-192	MIMAT0000222	CD14	-0.574133	2.21654	0.00927087	-28.5527	0.00455468	FALSE	-	FALSE	-	FALSE	-
hsa-miR-30c	MIMAT0000244	CD14	-0.587789	2.21654	0.00927087	-7.00515	8.66e-09	FALSE	-	FALSE	-	FALSE	-
hsa-miR-30e*	MIMAT0000693	CD14	-0.594405	2.21654	0.00927087	-6.40949	2.86e-08	FALSE	-	FALSE	-	FALSE	-
hsa-miR-4284	MIMAT0016915	CD14	-0.522534	2.21654	0.00927087	-5.84348	0.00234241	FALSE	-	FALSE	-	FALSE	-
hsa-miR-30b	MIMAT0000420	CD14	-0.597409	2.21654	0.00927087	-5.18561	2.83e-06	FALSE	-	FALSE	-	FALSE	-
hsa-miR-23b	MIMAT0000418	CD14	-0.582304	2.21654	0.00927087	-2.22707	0.000137514	FALSE	-	FALSE	-	FALSE	-
hsa-miR-194	MIMAT0000460	CD163	-0.630237	3.3103	0.0241913	-46.2178	9.52e-10	TRUE	miRanda	FALSE	-	FALSE	-
hsa-miR-204	MIMAT0000265	CD163	-0.53535	3.3103	0.0241913	-36.81	0.00154679	TRUE	miRanda,Targetscan	FALSE	-	FALSE	-
hsa-miR-532-5p	MIMAT0002888	CD163	-0.509326	3.3103	0.0241913	-4.15879	0.000754552	TRUE	miRanda,miRWalk,Targetscan	FALSE	-	FALSE	-
hsa-miR-23b	MIMAT0000418	CD163	-0.607378	3.3103	0.0241913	-2.22707	0.000137514	TRUE	miRanda,miRWalk,Targetscan	FALSE	-	FALSE	-
hsa-miR-192	MIMAT0000222	CD163	-0.630378	3.3103	0.0241913	-28.5527	0.00455468	FALSE	-	FALSE	-	FALSE	-
hsa-miR-30a*	MIMAT0000088	CD163	-0.545127	3.3103	0.0241913	-18.8146	0.00022834	FALSE	-	FALSE	-	FALSE	-
hsa-miR-30c-2*	MIMAT0004550	CD163	-0.531816	3.3103	0.0241913	-7.05949	0.000128821	FALSE	-	FALSE	-	FALSE	-
hsa-miR-30c	MIMAT0000244	CD163	-0.648851	3.3103	0.0241913	-7.00515	8.66e-09	FALSE	-	FALSE	-	FALSE	-
hsa-miR-30e*	MIMAT0000693	CD163	-0.641419	3.3103	0.0241913	-6.40949	2.86e-08	FALSE	-	FALSE	-	FALSE	-
hsa-miR-4284	MIMAT0016915	CD163	-0.508914	3.3103	0.0241913	-5.84348	0.00234241	FALSE	-	FALSE	-	FALSE	-
hsa-miR-30b	MIMAT0000420	CD163	-0.65205	3.3103	0.0241913	-5.18561	2.83e-06	FALSE	-	FALSE	-	FALSE	-
hsa-miR-660	MIMAT0003338	CD163	-0.503059	3.3103	0.0241913	-3.1577	0.00404992	FALSE	-	FALSE	-	FALSE	-
hsa-miR-192*	MIMAT0004543	CD163	-0.515707	3.3103	0.0241913	-2.59251	0.0496439	FALSE	-	FALSE	-	FALSE	-
hsa-miR-363	MIMAT0000707	CD163	-0.524147	3.3103	0.0241913	-2.52828	0.0236749	FALSE	-	FALSE	-	FALSE	-
[truncated: 11,028 more rows]

## Sheet: Blatt1 Table S4
Table S4. Clinical data of the patients.
sample no	Sample	Age at Diagnosis [months]	Histological subtype	risk stratification	local stage	overall stage	used for miRNA analysis	used for mRNA analysis
ws1030TB	tumor	82	blastema	high risk	I	I	yes	yes
ws1063T2	tumor	26	blastema	high risk	II	II	yes	yes
ws1073TA3	tumor	97	blastema	high risk	I	I	yes	yes
ws1098TA4	tumor	7	blastema	high risk	I	I	yes	yes
ws1106TA3	tumor	104	blastema	high risk	II	IV	yes	yes
ws38T	tumor	20	blastema	high risk	I	I	yes	yes
ws601TB3	tumor	41	blastema	high risk	I	I	yes	yes
ws746T1	tumor	78	blastema	high risk	I	I	yes	yes
ws808TB2	tumor	8	blastema	high risk	I	I	yes	yes
ws881Ta	tumor	146	blastema	high risk	II	II	yes	yes
ws901T	tumor	40	blastema	high risk	II	IV	yes	yes
ws914TA4	tumor	87	blastema	high risk	III	IV	yes	yes
ws917T	tumor	43	blastema	high Risk	III	III	yes	yes
ws958T	tumor	46	blastema	high Risk	III	V, bilateral	yes	yes
ws29T	tumor	55	blastema	high risk	II	II	yes	yes
ws930T	tumor	92	diffuse anaplasia	high Risk	III	III	yes	yes
ws991T	tumor	6	epithelial	intermediate risk	I	I	yes	yes
ws953T	tumor	22	focal anaplasia	intermediate risk	I	I	yes	yes
ws1002T	tumor	28	mixed	intermediate risk	I	I	yes	yes
ws1018Ni	normal kidney	51	mixed	intermediate risk	I	I	yes	yes
ws1018T	tumor	51	mixed	intermediate risk	I	I	yes	yes
ws906T	tumor	35	mixed	intermediate risk	II	II	yes	yes
ws919T	tumor	27	mixed	intermediate risk	I	I	yes	yes
ws938T	tumor	4	mixed	intermediate risk	I	I	yes	-
ws939Ni	normal kidney	37	mixed	intermediate risk	III	III	yes	yes
ws939T	tumor	37	mixed	intermediate risk	III	III	yes	-
ws1001T	tumor	46	regressive	intermediate risk	I	IV	yes	-
ws831T	tumor	124	regressive	intermediate risk	III	IV	yes	-
ws878Ni	normal kidney	22	regressive	intermediate risk	I	I	yes	yes
ws878T	tumor	22	regressive	intermediate risk	I	I	yes	-
ws886T	tumor	65	regressive	intermediate risk	II	II	yes	-
ws927T	tumor	64	regressive	intermediate risk	III	III	yes	yes
ws933T	tumor	58	regressive	intermediate risk	I	I	yes	yes
ws954T	tumor	29	regressive	intermediate risk	III	IV	yes	-
ws967T	tumor	45	regressive	intermediate risk	I	I	yes	-
ws968Ni	normal kidney	60	regressive	intermediate risk	I	IV	yes	yes
ws968T	tumor	60	regressive	intermediate risk	I	IV	yes	yes
ws988T	tumor	116	regressive	intermediate risk	II	II	yes	yes
ws994T	tumor	148	regressive	intermediate risk	I	I	yes	yes
ws904T	tumor	41	stroma	intermediate risk	I	I	yes	yes
